# Supplementary material for: Revealing an Iranian Isolate of Tomato Brown Rugose Fruit Virus: Complete Genome Analysis and Mechanical Transmission
Source: MDPI journal article supplement (doi:10.3390/microorganisms11102434), 2023-09-28
Supplement: s1 [file s1]

# Revealing an Iranian isolate of tomato brown rugose fruit virus: complete genome analysis and mechanical transmission

Fereshteh Esmailzadeh<sup>1</sup>, Adyatma Irawan Santosa<sup>2,\*</sup>, Ali Çelik<sup>3</sup>, Davoud Koolivand<sup>1</sup>

## Affiliations

<sup>1</sup>Department of Plant Protection, Faculty of Agriculture, University of Zanjan, Zanjan, Iran

<sup>2</sup>Department of Plant Protection, Faculty of Agriculture, Universitas Gadjah Mada, Jl. Flora No. 1, Sleman, Yogyakarta, 55281, Indonesia

<sup>3</sup>Department of Plant Protection, Faculty of Agriculture, Bolu Abant İzzet Baysal University, 14030 Bolu, Turkey

Correspondence: [adyatma.i.s@ugm.ac.id](mailto:adyatma.i.s@ugm.ac.id)

Alignments of sequence of ToBRFV isolates tested in this study, based on 126 KDa gene, 183 KDa gene, MP gene, CP gene, and the complete genome, are available as Fasta files. Complete nucleotide sequence of ToBRFV isolates tested in this study can also be found below.

KT383474

```
ATGGCATACACAGACAGCTACCACATCCGCTTTGCTCGACACTGTCCGAGGTAACAATACCTTGGTCAACG
ATCTTGCGAAGCGGCGTCTTTATGACACAGCGGTCGACGAGTTCAACGCTCGTGATCGCAGGCCCAAAGTAA
ATTTTCCAAAGTAATAAGTGAGGAACAGACGCTTATTGCTACTAGGGCATATCCAGAATTCCAGATAACCTTC
TATAATACGCAGAACGCCGTGCATTGCTTGCCTGCGGTTGGACTACGATCCTTAGAACTGGAATATCTAATGATGC
AGATCCCGTACGGATCACTCACATATGATATAGGTGGGAATTTGCATCTCATCTGTTCAAAGGACGGGCATA
TGTTCACTGCTGTATGCCAATCTTGATGTCCGCGACATAATGCGGCACGAAGGCCAGAAAGACAGTATAGAA
TTATACCTTTCCAGGCTTGAGCGGGGCAACAAAGTTGTCCCAAATTTCCAAAAGGAAGCTTTTGACAGATACG
CTGAAACGCCAGACGAAGTTGTCTGTACAGTACCTTCCAAACGTGTACGCACCAGCAGGTGGAAAACACAG
GCAGGGTGTATGCTATTGCATTGCACAGTATATACGATATACCTGCTGATGAATTCGGAGCGGCACTTTTAAG
GAAAAATGTCCATGTTTGTTACGCCGCTTCCACTTTTCCGAGAATTTACTTCTCGAAGATTCACACGTCAACCT
TGACGAAATCAACGCGTGTTTTTCGCGTGATGGAGACAAGCTGACTTTTTCTTTCGCATCTGAGAGCACTTTAA
ATTATTGTCATAGTTATTCTAATATTTTAAAATACGTGTGCAAACTTACTTCCCGGCATCTAATAGAGAGGTCT
ACATGAAGGAGTTTTTGGTCACCAGGGTTAACACCTGGTTTTGTAAGTTTTCTAGGATAGATACTTTTTTATTAT
ACAAGGGGGTAGCCCAACAAAGGTGTAAATAGTGAGCAATTTTACAGCGCAATGGAAGATGCATGGCACTACA
AAAAGACTCTTGCAATGTGTAACAGCGAGAGGATTCTTCTGAAGATTCCTCATCGGTCAATTACTGGTCCCA
AAAATGAGAGATATGGTCATAGTTCTCTATTTCGACATATCTCTCGACACCAGTAAAAGGACCCGCAAGAAG
TCTTAGTGTCAAAGGATTTTGTATTACAGTTTTAAATCACATTCGCACTTATCAAGCCAAGGCACTTACATACT
CCAATGTTTTATCCTTTGTGCAATCAATTCGTTCAAGGGTAATTATCAACGGAGTGACTGCCAGGTCTGAGTGG
GATGTTGACAAATCTTTTTGCAATCCTGTCCATGACATTTTTCTTGCATACTAAGCTTGCCGTTTTAAAAGAC
```

GAATTGTTAATCAGCAAGTTTAGTTTGGGGCCAAAATCAGTAAGCCAGCATGTATGGGATGAGATTTCCCTGG  
CTTTTGGAAACGCATTTCCATCGATCAAGGAGAGACTGCTAAATCGGAAACTAATTAAGTGTGGGAGACGC  
ATTAGAAATCAGGGTGCCTGATTTATATGTGACTTTTCACGATAGATTAGTGACTGAGTACAAAACATCGGTG  
GATATGCCAGTGCTTGATATCAGAAAGAGAATGGAGGAGACTGAGGTTATGTACAATGCATTGTCTGAGCTA  
TCTGTGCTCAAGGAGTCGGACAAGTTTCGACGTTGATGTTTTTTCCCGGATGTGCCAGACTTTGGAGGTAGACC  
CAATGACTGCAGCAAAGGTTATTGTGGCAGTGATGAGCAACGAGAGCGGACTGACTCTTACATTGAAACAGC  
CAACTGAAGCAAATGTCGCATTGGCACTTAAGATTAGAAAAAGCCTCTGAGGGTGCCTAGTGTTACTTC  
TAGAGATGTTGAAGAACCATCCATGAAGGGTTCAATGGCAAGAGGAGAGTTACAATTGGCCGGTCTGTCTGG  
AGACCAACCAGAGTCTTCTATACTCGGAACGAGGAAATAGAGTCATTAGAGCAATTCCACATGGCAACGGCT  
AGTTCGTTAATTCGGAAACAGATGAGTTCGATTGTGTACACGGGCCCCATTAAAGTTCAGCAAATGAAAACT  
TTATTGATAGCCTGGTAGCATCACTCTCTGCTGCGGTGTGCAACCTAGTCAAGATCCTAAAGGATACAGCTGCT  
ATAGATCTCGAAACCCGTCAGAAGTTTGGAGTCTTAGATGTTGCGACCAAAGATGGTTAATTAACCTTTAG  
CCAAGAATCACGCATGGGGCGTTATTGAAACACATGCTAGGAAGTACCACGTTGCACTTTTGGAGTATGATGA  
GCATGGAGTGGTAACTTGCACAGTTGGAGAAGGGTGGCCGTGAGTTCGAGTCAATGGTTTATTCTGATAT  
GGCAAAGCTCAGAACTGAGGAGATTATTAAGAGATGGTGAGCCTCATGTCAGCAGTGCTAAAGTCGTCT  
AGTTGACGGTGTCCCGGGTTGTGGAAAGACAAAAGAGATTCTCTCGAAAGTAAATTTTGGAGGAAGATCTAAT  
CTTAGTACCGGGTAAGCAGGCTGCTGAAATGATAAAGAGGCGTGCTAATGCGTCAGGAATAATTCAAGCCAC  
AAGAGATAATGTTCTGACTGTTGATTCAATTATAATGAATTACGGTAAAGGAACACGCTGTCAGTTCAAAAGG  
TTATTTATCGACGAAGGTCTGATGTTGCACACTGGTTGTGTGAATTTCTTGTCTATGTCTCTGTGCGAAATT  
GCATATGTTTATGGAGACACACAACAAATTCCATACATCAACAGAGTATCCGGTTTTCCGTACCCTGCACATTT  
TGCAAAAATAGAGTTGATGAGGTGGAACTCGCAGAACTACGCTGCGTTGTCCAGCCGACATTACCCACTAT  
CTTAACAGAAGGTACGAAGGATATGTCATGTGTACATCGTCGGTTAAAAAGTCAGTTTCTCAGGAAATGGTGA  
GCGGGGCCGCAATGATCAATCCTGTATCTAAGCCATTGAATGGGAAAGTTTGACTTTCAGTCTGATGATAA  
AGAGGCGCTGCTTCTCGAGGATATACGGACGTCCATACAGTACATGAGGTACAAGGTGAGACATATGCAGA  
TGTGTGTTGGTCAGATTGACTCCGACACCTGTATCTATCATCGCAGGAGATAGTCCGCACGTTCTCGTAGCTT  
TGTCAGGCATACCCAAACATTGAAGTATTACACCGTAGTGATGGATCCTTGTGAAGTATAATTAGGGATTTA  
GAAAACTTAGTTCTTACTTGTTAGATATGTATAAAGTAGATGCAGGGACCCAATAGCAATTACAGGTAGACT  
CCGTGTTTAAAGGTTCTAATCTTTTGTGTCAGCACCAAGACTGGAGATATCTCAGATATGCAATTTTACTAT  
GATAAGTGTCTCCAGGTAATAGCACCATGTTAAATAACTATGATGCTGTTACCATGAGGTTGACTGACATTT  
TCTTAATGTCAAAGATTGCATATTGGATTTCTCTAAGTCTGTGGCTGCACCGAAGGATCCGATCAAACCACTGA  
TTCCGATGGTACGAACGGCGGCAGAAATGCCACGCCAGACTGGACTATTGGAAAATTTGGTGGCGATGATCA  
AAAGAACTTTAATTCACCGGAGTTATCAGGAATAATCGACATTGAGAATACTGCATCTTTAGTAGTAGATAA  
ATTTTTGATAGTTACTTGCTTAAAGAAAAAGAAAAACCAATAAAAAATGTTTCTTTATTTGTAGAGAGTCTCT  
CAATAGATGGTTAGAGAAGCAGGAGCAAGTGACCATTGGTCAGCTTGCAGATTTTGATTTTGTGGATCTTCT  
GCCGTTGATCAGTACAGGCATATGATTAAGCGCAACCTAAGCAGAAGCTGGATACATCAATTCAAAGCGAAT  
ATCCGGCCTTGACAGCAGATTGTGTATCATTCGAAAAAGATCAACGCAATCTTCGGTCTTTGTTCAAGTGAGCTC  
ACAAGGCAAATGCTCGAAAGCATAGACTCAAGTAAGTTTTTGTCTTTACAAGGAAGACGCCAGCTCAAATTG  
AGGATTTCTTCGGAGATCTCGATAGCCATGTCCCTATGGATATCTTGAGTTGGATATTTGGAAGTATGACAAA  
TCTCAGAACGAGTTCCTGTCAGTAGAGTATGAAATATGGAGAAGACTTGATTAGAAGATTTTCTGGGA  
GAAGTTTGGAAACAAGGCCACAGGAAACTACTCTTAAAGATTACACAGCTGGTATTAAACGTGTTTATGGT  
ACCAGAGAAAGAGTGGGGACGTTACAACATTATCGGTAATACGGTGATTATTGCTGCTTGTGTTAGCTTCCAT  
GTTGCCCATGGAGAAAATAATCAAAGGTGCATTTTGGGAGATGACAGTTTACTATACTTCCCAAAGGTTGT  
GAGTTTCTGACATACAGCATACAGCAACCTTATGTGGAATTTGAGGCTAAGCTATTCAGAAAGCAGTATG  
GTTATTTCTGTGGAAGGTACGTGATACATCATGACAGAGGGTGTATTGTTTATTATGACCTTTGAAGTTGATT  
TCTAACTTGGTGCTAAACACATCAAGGATTGGGATCACTTAGAAGAGTTCAGAAGATCCCTTTGTGATGTTG  
CAAATTCGTTGAACAACTGTGCGTATTACACGCAGTTGGACGACGCTGTGAGTGAGGTCCATAAAACCGCACC  
CCCGGGTTCGTTTGTATATAAAAGTTAGTTAAATATCTGTCCGATAAGGTTCTTTTAGAAGTTTGTATAGA  
TGGCTCTTGTTAAGGGTAAAGTCAATATTAATGAGTTCATAGACTTGTCAAAATCAGAAAAATTTCTCCGTCT

ATGTTACACCTGTTAAGAGTGTCATGATCTCCAAGGTTGATAAGATATTGGTTCATGAAGATGAATCTTTGTC  
CGAAGTCAATTTACTCAAAGGTGTAAACTCATTGATGGTGGCTATGTACATCTTGCTGGTCTTGTGGTGACA  
GGTGAATGGAATTTGCCAGATAATTGTCGTGGTGGTGTCAAGTGTCTGTTTGGTCGATAAGAGAATGGAGAGA  
GCGGACGAGGCAACTCTTGCTTCACTATACCGCAGCGGCTAAGAAAAGGTTTCAGTTCAAAGTCGTTCCAA  
ATTACAACATCACTACCAAGGACGCAGAAAAGGCAGTTTGGCAAGTACTAGTTAATATTAGAAATGTTAAAT  
TGCTGCGGGTTACTGTCCGCTGTCATTAGAATTTGTGTCAAGTGTGATTGTTTATAAAAATATTATAAACTCG  
GTTTGAGAGAGAAAATTACGAGCGTCACGGATGGAGGGCCCATGGAAGTATCAGAAGAAGTTGTTGATGAG  
TTCATGGAAGAAGTCCCGATGTCTGTAAGGCTTGCAAAATTTGTTTGAAGACCGGAAAAAGTTTAGTAGTA  
AAAGTGAGAATAATAGTGGTAATAATAGGCCGAAACCAGACAAAAACCAAGGAAGGAAAAGGGTTTAAAA  
GTTAGGGTTGAGAAGGATAATTTAATTGATAATGAATTGGAGACTTACGTCGCCGATTGAGATTCGTATTAAA  
TATGTCTTACACAATCGCAACTCCATCGCAATTTGTGTTTTTGTATCAGCATGGGCCGACCCTATAGAATTAAT  
AAATTTATGTACTAATTCAGTGGTAATCAGTTCCAAACACAACAAGCTAGAACAACCGTTCAACGGCAATTTA  
GCGAAGTGTGGAAACCTGTCCCTCAAGTCACTGTTAGGTTTCTGACAGTGGTTTTAAGGTGTATAGGTACAA  
TGCGGTACTAGATCCTCTAGTTACTGCTTTGTTAGGAGCTTCGATACTAGAAATAGGATTATAGAAGTCGAAA  
ATCAGGCGAACCCGACAACCGCCGAAACGTTAGACGCTACTCGTAGAGTAGATGACGCAACGGTGGCTATAA  
GGAGCGCTATAATAATTTAGTAGTAGAATTGGTCAAAGGAACAGGTTTGTACAATCAGAGCACATTTGAAA  
GTGCATCCGGTTTACAATGGTCCTCTGCACCTGCATCTTGA

KX619418

ATGGCATAACACAGACAGCTACCACATCCGCTTTGCTCGACACTGTCCGAGGTAACAATACCTTGGTCAACG  
ATCTTGCGAAGCGGCGTCTTTATGACACAGCGGTGACGAGTTCAACGCTCGTGATCGCAGGCCCAAAGTAA  
ATTTTTCCAAAGTAATAAGTGAGGAACAGACGCTTATTGCTACTAGGGCATATCCAGAATTCCAGATAACCTTC  
TATAATACGCAGAACGCCGTGCATTGCTTCCGGTGGACTACGATCCTTAGAACTGGAATATCTAATGATGC  
AGATCCCGTACGGATCACTCACATATGATATAGGTGGGAATTTGCATCTCATCTGTTCAAAGGACGGGCATA  
TGTTCACTGCTGTATGCCAATCTTGATGTCCGCGACATAATGCGGCACGAAGGCCAGAAAGACAGTATAGAA  
TTATACCTTTCCAGGCTTGAGCGGGGCAACAAAGTTGTCCCAAATTTCCAAAGGAAGCTTTTGACAGATACG  
CTGAAACGCCAGACGAAGTTGTCTGTACAGTACCTTCCAAACGTGTACGCACCAGCAGGTGGAAAACACAG  
GCAGGGTGTATGCTATTGCATTGCACAGTATATACGATATACCTGCTGATGAATTCGGAGCGGCACTTTTAAG  
GAAAAATGTCCATGTTTGTACGCCGCCTTCCACTTTTCCGAGAATTTACTTCTCGAAGATTCACACGTCAACCT  
TGACGAAATCAACGCGTGTTCGCGTGATGGAGACAAGCTGACTTTTCTTCGCATCTGAGAGCACTTTAA  
ATTATTGTCATAGTTATTCTAATATTTTAAAATACGTGTGCAAACTTACTTCCCGGCATCTAATAGAGAGGTCT  
ACATGAAGGAGTTTTTGGTCACCAGGGTTAACACCTGGTTTTGTAAGTTTTCTAGGATAGATACTTTTTTATTAT  
ACAAGGGGGTAGCCCAAAAGGTGTAAATAGTGAGCAATTTTACAGCGCAATGGAAGATGCATGGCACTACA  
AAAAGACTCTTGCAATGTGTAAACAGCGAGAGGATTCTTCTGAAGATTCCTCATCGGTCAATTACTGGTCCCA  
AAAATGAGAGATATGGTCATAGTTCTCTATTGACATATCTCTCGACACCAGTAAAAGGACCCGCAAAGAAG  
TCTTAGTGTCAAAGGATTTTGTATTACAGTTTTAAATCACATTGCACTTATCAAGCCAAGGCACTTACATACT  
CCAATGTTTTATCCTTTGTCGAATCAATTCGTTCAAGGGTAATTATCAACGGAGTGACTGCCAGGTCTGAGTGG  
GATGTTGACAAATCTTTTTGCAATCCTTGTCATGACATTTTCTTGCACTAAGCTTGCCGTTTTAAAAGAC  
GAATTGTTAATCAGCAAGTTTAGTTTGGGGCCAAAATCAGTAAGCCAGCATGTATGGGATGAGATTTCCCTGG  
CTTTTGAAACGCATTTCCATCGATCAAGGAGAGACTGCTAAATCGGAACTAATTAAGTGTGCGGAGACGC  
ATTAGAAATCAGGGTGCCTGATTTATATGTGACTTTTACGATAGATTAGTGACTGAGTACAAAACATCGGTG  
GATATGCCAGTGCTTGATATCAGAAAGAGAATGGAGGAGACTGAGGTTATGTACAATGCATTGTCTGAGCTA  
TCTGTGCTCAAGGAGTCGGACAAGTTGACGTTGATGTTTTTCCCGGATGTGCCAGACTTTGGAGGTAGACC  
CAATGACTGCAGCAAAGGTTATTGTGGCAGTGATGAGCAACGAGAGCGGACTGACTCTTACATTGCAACAGC  
CAACTGAAGCAAATGTCGATTGGCACTTAAAGATTGAGAAAAAGCCTCTGAGGGTGAAGTGGTTACTTC  
TAGAGATGTTGAAGAACCATCCATGAAGGGTTCAATGGCAAGAGGAGAGTTACAATTGGCCGGTCTGTCTGG

AGACCAACCAGAGTCTTCCTATACTCGGAACGAGGAAATAGAGTCATTAGAGCAATTCCACATGGCAACGGCT  
AGTTCGTTAATTCGGAACAGATGAGTTCGATTGTGTACACGGGCCCATTAAGTTCAGCAAATGAAAACT  
TTATTGATAGCCTGGTAGCATCACTCTCTGCTGCGGTGTCGAACCTAGTCAAGATCCTAAAGGATACAGCTGCT  
ATAGATCTCGAAACCCGTCAGAAGTTTGGAGTCTTAGATGTTGCGACCAAAGATGGTTAATTAACCTTTAG  
CCAAGAATCACGCATGGGGCGTTATTGAAACACATGCTAGGAAGTACCACGTTGCACTTTTGGAGTATGATGA  
GCATGGAGTGGTAACTTGCACAGTTGGAGAAGGGTGGCCGTGAGTTCAGTCAATGGTTTATTCTGATAT  
GGCAAAGCTCAGAACACTGAGGAGATTATTAAGAGATGGAGAGCCTCATGTGAGCAGTGCTAAAGTCGTCCT  
AGTTGACGGTGTCCCGGGTTGTGGAAAGACAAAAGAGATTCTCTCGAAAGTAAATTTTGAGGAAGATCTAAT  
CTTAGTACCGGGTAAGCAGGCTGCTGAAATGATAAAGAGGCGTGCTAATGCGTCAGGAATAATTCAAGCCAC  
AAGAGATAATGTTCTGACTGTTGATTCAATTTATAATGAATTACGGTAAAGGAACACGCTGTGAGTTCAAAAGG  
TTATTTATCGACGAAGGTCTGATGTTGCACACTGGTTGTGTGAATTTTCTGTTTCTATGTCTCTGTGCGAAATT  
GCATATGTTTATGGAGACACACAACAAATTCCATACATCAACAGAGTATCCGGTTTTCCGTACCCTGCACATTT  
TGCAAAAATAGAGGTTGATGAGGTGGAACTCGCAGAACTACGCTGCGTTGCCAGCCGACATTACCCACTAT  
CTTAACAGAAGGTACGAAGGACATGTCATGTGTACATCGTCGGTTAAAAAGTCAGTTTCTCAGGAAATGGTGA  
GCGGGGCCGCAATGATCAATCCTGTATCTAAGCCATTGAATGGGAAAGTTTTGACTTTCACTCAGTCTGATAA  
AGAGGCGCTGCTTCTCGAGGATATACGGACGTCCATACAGTACATGAGGTACAAGGTGAGACATATGCAGA  
TGTGTCGTTGGTCAGATTGACTCCGACACCTGTATCTATCATCGCAGGAGATAGTCCGCACGTTCTCGTAGCTT  
TGTC AAGGCATACCCAAACATTGAAGTATTACCCGTAGTGATGGATCCTCTTGTAAGTATAATTAGGGATTGA  
GAAAACTTAGTTCTTACTTGTTAGATATGTATAAAGTAGATGCAGGGACCCAATAGCAATTACAGGTAGACT  
CCGTGTTTAAAGGTTCTAATCTTTTTGTTGCAGCACCAAAGACTGGAGATATCTCAGATATGCAATTTTACTAT  
GATAAGTGCTCTCCAGGTAATAGCACCATGTTAAATAACTATGATGCTGTTACCATGAGGTTGACTGACATTTT  
TCTTAATGTCAAAGATTGCATATTGGATTTCTCTAAGTCTGTGGCTGCACCGAAGGATCCGATCAAACCACTGA  
TTCCAATGGTACGAACGGCGGCAGAAATGCCACGCCAGACTGGACTATTGGAAAATTTGGTGGCGATGATCA  
AAAGAACTTTAATTCACCGGAGTTATCAGGAATAATCGACATTGAGAATACTGCATCTTTAGTAGTAGATAA  
ATTTTTGATAGTTACTTGCTTAAAGAAAAAGAAAACCAAATAAAAAATGTTTCTTTATTTGTAGAGAGTCTCT  
CAATAGATGGTTAGAGAAGCAGGAGCAAGTGACCATTGGTCAGCTTGAGATTTTGATTTTGTGGATCTTCCT  
GCCGTTGATCAGTACAGGCATATGATTAAGCGCAACCTAAGCAGAAGCTGGATACATCAATTCAAAGCGAAT  
ATCCGGCCTTGACAGACGATTGTGTATCATTGAAAAAGATCAACGCAATCTTCGGTCCTTTGTTGAGTGAGCTC  
ACAAGGCAAATGCTCGAAAGCATAGACTCAAGTAAGTTTTTGTCTTTACAAGGAAGACGCCAGCTCAAATTG  
AGGATTTCTTCGGAGATCTCGATAGCCATGTCCCTATGGATATCTTGAGTTGGATATTTGGAAGTATGACAAA  
TCTCAGAACGAGTTCCACTGTGCAGTAGAGTATGAAATATGGAGAAGACTTGGATTAGAAGATTTTCTGGGA  
GAAGTTTGAAACAAGGCCACAGGAAAACACTCTTAAAGATTACACAGCTGGTATTAACCGTGTATGTTGTT  
ACCAGAGAAAAGAGTGGGGACGTTACAACATTATCGGTAATACGGTGATTATTGCTGCTTGTTAGCTTCCAT  
GTTGCCCATGGAGAAAATAATCAAAGGTGCATTTTTCGGAGATGACAGTTTACTATACTTCCAAAAGGTTGT  
GAGTTTCTGACATACAGCATAACAGCCAACCTTATGTGGAATTTTCGAGGCTAAGCTATTCAGAAAGCAGTATG  
GTTATTTCTGTGGAAGGTACGTGATACATCATGACAGAGGGTGTATTGTTTATTATGACCTTTGAAGTTGATT  
TCTAACTTGGTGCTAAACACATCAAGGATTGGGATCACTTAGAAGAGTTCAGAAGATCCCTTTGTGATGTTG  
CAAATTCGTTGAACAACCTGTGCGTATTACACGCAGTTGGACGACGCTGTGAGTGAGGTCCATAAAACCGCACC  
CCCGGGTTCGTTTGTATATAAAAGTTTAGTTAAATATCTGTCCGATAAGGTTCTTTTGAAGTTTGTATAGA  
TGGCTCTTGTTAAGGGTAAAGTCAATATTAATGAGTTCATAGACTTGCAAAATCAGAAAAATTTCTCCGTCT  
ATGTTACACCTGTTAAGAGTGTGATCTCCAAGGTTGATAAGATATTGGTTCATGAAGATGAATCTTTGTC  
CGAAGTCAATTTACTCAAAGGTGTAAACCTATTGATGGTGGCTATGTACATCTTGCTGGTCTTGTTGAGTACA  
GGTGAATGGAATTTGCCAGATAATTGTCGTGGTGGTGTGAGTGTCTGTTTGGTCGATAAGAGAATGGAGAGA  
GCGGACGAGGCAACTCTTGCTTCACTATACCGCAGCGGCTAAGAAAAGGTTTCAGTTCAAAGTCGTTCCAA  
ATTACAACATCACTACCAAGGACGCAGAAAAGGCAGTTTGGCAAGTACTAGTTAATATTAGAAATGTTAAAT  
TGCTGCGGGTACTGTCCGCTGTATTAGAATTTGTGTGAGTGTGATTGTTTATAAAAAATATTATAAACTCG  
GTTTGAGAGAGAAAATTACGAGCGTCACGGATGGAGGGCCCATGGAATATCAGAAAGAGTTGTTGATGAG  
TTCATGGAAGAAGTCCCGATGTCTGTAAGGCTTGCAAAATTTGTTTGAAGACCGGAAAAAGTTTAGTAGTA

AAAGTGAGAATAATAGTGGTAATAATAGGCCGAAACCAAACAAAAACCAAAGGAAGGAAAAGGGTTTAAAA  
GTTAGGGTTGAGAAGGATAATTTAATTGATAATGAATTGGAGACTTACGTCGCCGATTGAGATTCGTATTAAA  
TATGTCTTACACAATCGCACTCCATCGCAATTTGTGTTTTGTGTCATCAGCATGGGCCGACCCTATAGAATTAAT  
AAATTTATGTACTAATTCAGTGGTAATCAGTTCCAAACACAACAAGCTAGAACAAACCGTTCAACGGCAATTTA  
GCGAAGTGTGGAAACCTGTCCCTCAAGTCACTGTTAGGTTTCTGACAGTGGTTTTAAGGTGTATAGGTACAA  
TGCGGTACTAGATCCTCTAGTTACTGCTTTGTTAGGAGCTTTCGATACTAGAAATAGGATTATAGAAGTCGAAA  
ATCAGGCGAACCCGACAACCGCCGAAACGTTAGACGCTACTCGTAGAGTAGATGACGCAACGGTGGCTATAA  
GGAGCGCTATAAATAATTTAGTAGTAGAATTGGTCAAAGGAACAGGTTTGTACAATCAGAGCACATTTGAAA  
GTGCATCCGGTTTACAATGGTCCTCTGCACCTGCATCTTGA

MK133095

ATGGCATACACACAGACAGCTACCACATCCGCTTTGCTCGACACTGTCCGAGGTAACAATACCTTGGTCAACG  
ATCTTGCGAAGCGGCGTCTTTATGACACAGCGGTGACGAGTTCAACGCTCGTGATCGCAGGCCCAAAGTAA  
ATTTTTCCAAAGTAATAAGTGAGGAACAGACGCTTATTGCTACTAGGGCATATCCAGAATTCCAGATAACCTTC  
TATAATACGCAGAACGCCGTGCATTGCTTCCGGTGGACTACGATCCTTAGAACTGGAATATCTAATGATGC  
AGATCCCGTACGGATCACTCACATATGATATAGGTGGGAATTTGCATCTCATCTGTTCAAAGGACGGGCATA  
TGTTCACTGCTGTATGCCAATCTTGATGTCCGCGACATAATGCGGCACGAAGGCCAGAAAGACAGTATAGAA  
TTATACCTTTCCAGGCTTGAGCGGGGCAACAAAGTTGTCCCAAATTTCCAAAGGAAGCTTTTGACAGATACG  
CTGAAACGCCAGACGAAGTTGTCTGTACAGTACCTTCCAAACGTGTACTCACCAGCAGGTGGAAAACACAG  
GCAGGGTGTATGCTATTGCACTGCACAGTATATACGATATACCTGCTGATGAATTCGGAGCGGCACTTTTAAG  
GAAAAATGTCCATGTTTGTACGCCGCCTTCCACTTTTCCGAGAATTTACTTCTCGAAGATTCACATGTCAACCT  
TGACGAAATCAATGCGTGTTCGCGTGATGGAGACAAGCTGACTTTTCTTTCGCATCTGAGAGCACTTTAA  
ATTATTGTCATAGTTATTCTAATATTTTAAAATACGTGTGCAAACTTACTTCCCGGCATCTAATAGAGAGGTCT  
ACATGAAGGAGTTTTTGGTCACCAGGGTTAACACCTGGTTTTGTAAGTTTTCTAGGATAGATACTTTTTTATTAT  
ACAAGGGGGTAGCCCAAAAGGTGTAAATAGTGAGCAATTTTACAGCGCAATGGAAGATGCATGGCACTACA  
AAAAGACTCTTGCAATGTGTAAACAGCGAGAGGATTCTTCTGAAGATTCCTCATCGGTCAATTACTGGTCCCA  
AAAATGAGAGATATGGTCATAGTTCTCTATTGACATATCTCTCGACACCAGTAAAAGGACCCGCAAAGAAG  
TCTTAGTGTCAAAGGATTTTGTATTACAGTTTTAAATCACATTCGCACTTATCAAGCCAAGGCATTACATACT  
CCAATGTTTTATCCTTTGTGCAATCAATTCGTTCAAGGGTAATTATCAACGGAGTGACTGCCAGGTCTGAGTGG  
GATGTTGACAAATCTTTTGCAATCCTGTCCATGACATTTTCTTGCACTAAGCTTGCCGTTTTAAAAGAC  
GAATTGTTAATCAGCAAGTTTAGTTTGGGGCCAAAATCAGTAAGCCAGCATGTATGGGATGAGATTTCCCTGG  
CTTTTGAAACGCATTTCCATCGATCAAGGAGAGACTGCTAAATCGGAACTAATTAAAGTGTGCGGAGACGC  
ATTAGAAATCAGGGTGCCTGATTTATATGTGACTTTTACGATAGATTAGTGACTGAGTACAAAACATCGGTG  
GATATGCCAGTGCTTGATATCAGAAAGAGAATGGAGGAGACTGAGGTTATGTACAATGCATTGTCTGAGCTA  
TCTGTGCTCAAGGAGTCGGACAAGTTGACGTTGATGTTTTTCCCGGATGTGCCAGACTTTGGAGGTAGACC  
CAATGACTGCAGCAAAGGTTATTGTGGCAGTGATGAGCAACGAGAGCGGACTGACTCTTACATTGCAACAGC  
CAACTGAAGCAAATGTCGATTGGCACTTAAAGATTGAGAAAAAGCCTCTGAGGGTGAAGTGGTTACTTC  
TAGAGATGTTGAAGAACCATCCATGAAGGGTTCAATGGCAAGAGGAGATTACAATTGGCCGGTCTGTCTGG  
AGACCAACCAGAGTCTTCTATACTCGGAACGAGGAAATAGAGTCATTAGAGCAATTCACATGGCAACGGCT  
AGTTCGTTAATTCGGAAACAGATGAGTTGATTGTGTACACGGGCCCATTAAGTTGAGCAAATGAAAACT  
TTATTGATAGCCTGGTAGCATCACTCTCTGCTGCGGTGTGCAACCTAGTCAAGATCCTAAAGGATACAGCTGCT

ATAGATTTTCAAACCCGTCAGAAGTTTGGAGTCTTAGATGTTGCGACCAAAAGATGGTTAATTAACCTTTAG  
CCAAGAATCACGCATGGGGCGTTATTGAAACACATGCTAGGAAGTACCACGTTGCACTTTTGGAGTATGATGA  
GCATGGAGTGGTAACTTGCGACAGTTGGAGAAGGGTGGCCGTGAGTTCTGAGTCAATGGTTTATTCTGATAT  
GGCAAAGCTCAGAACACTGAGGAGATTATTAAGAGATGGTGAGCCTCATGTCAGCAGTGCTAAAGTCGTCT  
AGTTGACGGTGTCCCGGGTTGTGGAAAGACAAAAGAGATTCTCTCGAAAGTAAATTTTGAGGAAGATCTAAT  
CTTAGTACCGGGTAAGCAGGCTGCTGAAATGATAAAGAGGCGTGCTAATGCGTTAGGAATAATTCAAGCCAC  
AAGAGATAATGTTCTGACTGTTGATTCAATTATAATGAATTACGGTAAAGGAACACGCTGTCAGTTCAAAAGG  
TTATTTATCGACGAAGGTCTGATGTTGCACACTGGTTGTGTGAATTTTCTGTTTCTATGTCTCTGTGCGAAATT  
GCATATGTTTATGGAGACACACAACAAATTCCATACATCAACAGAGTATCCGGTTTTCCGTACCCTGCACATTT  
TGCAAAAATAGAGGTTGATGAGGTGGAACTCGCAGAACTACGCTGCGTTGTCCAGCCGACATTACCCACTAT  
CTTAACAGAAGGTACGAAGGACATGTCATGTGTACATCGTCGGTTAAAAAGTCAGTTTCTCAGGAAATGGTGA  
GCGGGGCCGCAATGATCAATCCTGTATCTAAGCCATTGAATGGGAAAGTTTTGACTTTCACTCAGTCTGATAA  
AGAGGCGCTGCTTCTCGAGGATATACGGACGTCCATACAGTACATGAGGTACAAGGTGAGACATATGCAGA  
TGTGTCGTTGGTCAGATTGACTCCGACACCTGTATCTATCATCGCAGGAGATAGTCCGCACGTTCTCGTAGCTT  
TGTCAAGGCATACCCAAACATTGAAGTATTACACCGTAGTGATGGATCCTCTTGTAAGTATAATTAGGGATTTA  
GAAAACTTAGTTCTTACTTGTTAGATATGTATAAAGTAGATGCAGGGACCCAATAGCAATTACAGGTAGACT  
CCGTGTTTAAAGGTTCTAATCTTTTTGTTGCAGCACCAAAGACTGGAGATATCTCAGATATGCAATTTTACTAT  
GATAAGTGCTCCCAGGTAATAGCACCATGTTAAATACTATGATGCTGTTACCATGAGGTTGACTGACATTTT  
TCTTAATGTCAAAGATTGCATATTGGATTTCTCTAAGTCTGTGTCTGCACCGAAGGATCCGATCAAACCACTGA  
TTCCAATGGTACGAACGGCGGCAGAAAAGCCACGCCAGACTGGACTATTGGAAAATTTGGTGGCGATGATCA  
AAAGAACTTTAATTCACCGGAGTTATCAGGAATAATCGACATTGAGAATACTGCATCTTTAGTAGTAGATAA  
ATTTTTGATAGTTACTTGCTTAAAGAAAAAGAAAACCAAATAAAAAATGTTTCTTTATTTGTAGAGAGTCTCT  
CAATAGATGGTTAGAGAAGCAGGAGCAAGTGACCATTGGTCAGCTTGCAGATTTTGATTTTGTGGATCTTCT  
GCCGTTGATCAGTACAGGCATATGATTAAGCGCAACCTAAGCAGAAGCTGGATACATCAATTCAAAGCGAAT  
ATCCGGCCTTGCAGACGATTGTGTATCATTGAAAAAGATCAACGCAATCTTCGGTCCTTTGTTTCAGTGAGCTC  
ACAAGGCAAATGCTCGAAAGCATAGACTCAAGTAAGTTTTTGTCTTTACAAGGAAGACGCCAGCTCAAATTG  
AGGATTTCTTCGGAGATCTCGATAGCCATGTCCCTATGGATATCTTGGAGTTGGATATTTGAAAGTATGACAAA  
TCTCAGAACGAGTTCCACTGTGCAGTAGAGTATGAAATATGGAGAAGACTTGGATTAGAAGATTTTCTGGGA  
GAAGTTTGAAACAAGGCCACAGGAAAACACTCTTAAAGATTACACAGCTGGTATTAACCGTGTTTATGGT  
ACCAGAGAAAGAGTGGGGACGTTACAACATTCATCGGTAATACGGTGATTATTGCTGCTTGTAGCTTCCAT  
GTTGCCCATGGAGAAAATAATCAAAGGTGCATTTTTCGGAGATGACAGTTTACTATACTTCCAAAAGGTTGT  
GAGTTTCTGACATACAGCATAACAGCCAACCTTATGTGGAATTTTCGAGGCTAAGCTATTCAGAAAGCAGTATG  
GTTATTTCTGTGGAAGGTACGTGATACATCACGACAGAGGGTGTATTGTTTATTATGACCTTTGAAGTTGATT  
TCTAAACTTGGTGCTAAACACATCAAGGATTGGGATCACTTAGAAGAGTTCAGAAGATCCCTTTGTGATGTTG  
CAAATTCGTTGAACAACTGTGCGTATTACACGCAGTTGGACGACGCTGTGAGTGAGGTCCATAAAACCGCACC  
CCCGGGTTCGTTTGTATATAAAAGTTTGTAAATATCTGTCCGATAAGGTTCTTTTTAGAAGTTTGTATAGA  
TGGCTCTTGTTAAGGGTAAAGTCAATATTAATGAGTTCATAGACTTGTCAAATCAGAAAAATTTCTCCGTCT  
ATGTTACACCTGTTAAGAGTGTGATGATCTCCAAGGTTGATAAGATATTGGTTCATGAAGATGAATCTTTGTC  
CGAAGTCAATTTACTCAAAGGTGTAAACTCATTGATGGTGGCTATGTACATCTTGCTGGTCTTGTGGTGACA  
GGTGAATGGAATTTGCCAGATAATTGTCGTGGTGGTGTGAGTGTCTGTTTGGTCGATAAGAGAATGGAGAGA  
GCGGACGAGGCAACTCTTGCTTCATACTATACCGCAGCGGCTAAGAAAAGGTTTCAGTTCAAAGTCGTTCCAA  
ATTACAACATCACTACCAAGGACGCAGAAAAGGCAGTTTGGCAAGTACTAGTTAATATTAGAAATGTTAAAT  
TGCTGCGGGTTACTGTCCGCTGTCATTAGAATTTGTGTGAGTGTGATTGTTTATAAAAAATATTATAAACTCG  
GTTTGAGAGAGAAAATTACGAGCGTCACGGATGGAGGGCCTATGGAATATCAGAAGAAGTTGTTGATGAGT  
TCATGGAAGAAGTCCCGATGTCTGTAAGGCTTGCAAAATTTGTTTCGAAGACCGGAAAAAAGTTTAGTAGTAA  
AAGTGAGAATAATAGTGGTAATAATAGGCCGAAACCAAACAAAAACCAAAGGAAGGAAAAGGGTTTAAAG  
TTAGGGTTGAGAAGGATGATTTAATTGATAATGAATTGGAGACTTACGTCGCCGATTGAGATTCGTATTAAT  
ATGTCTTACACAATCGCAACTCCATCGCAATTTGTGTTTTGTCATCAGCATGGGCCGACCCTATAGAATTAATA

AATTTATGTACTAATTCAGTGTCCAAACACAACAAGCTAGAACAACCGTTCAACGGCAATTTAG  
CGAAGTGTGGAAACCTGTCCCTCAAGTCACTGTTAGGTTTCTGACAGTGGTTTTAAGGTGTATAGGTACAAT  
GCGGTACTAGATCCTCTAGTTACTGCTTTGTTAGGAGCTTTCGATACTAGAAATAGGATTATAGAAGTCGAAA  
ATCAGGCGAACCCGACAACCGCCGAAACGTTAGACGCTACTCGTAGAGTAGATGACGCAACGGTGGCTATAA  
GGAGCGCTATAAATAATTTAGTAGTAGAATTGGTCAAAGGAACAGGTTTGTACAATCAGAGCACATTTGAAA  
GTGCATCCGGTTTACAATGGTCCTCTGCACCTGCATCTTGA

MK165457

ATGGCATACACACAGACAGCTACCACATCCGCTTTGCTCGACACTGTCCGAGGTAACAATACCTTGGTCAACG  
ATCTTGCGAAGCGGCGTCTTTATGACACAGCGGTGCGACGAGTTCAACGCTCGTGATCGCAGGCCCAAAGTAA  
ATTTTTCCAAAGTAATAAGTGAGGAACAGACGCTTATTGCTACTAGGGCATATCCAGAATTCAGATAACCTTC  
TATAATACGCAGAACGCCGTGCATTGCTTCCGGTGGACTACGATCCTTAGAACTGGAATATCTAATGATGC  
AGATCCCGTACGGATCACTCACATATGATATAGGTGGGAATTTTGCATCTCATCTGTTCAAAGGACGGGCATA  
TGTTCACTGCTGTATGCCAATCTTGATGTCCGCGACATAATGCGGCACGAAGGCCAGAAAGACAGTATAGAA  
TTATACCTTTCCAGGCTTGAGCGGGGCAACAAAGTTGTCCCAAATTTCCAAAAGGAAGCTTTTGACAGATACG  
CTGAAACGCCAGACGAAGTTGTCTGTACAGTACCTTCCAAACGTGTACGCACCAGCAGGTGGAAAACACAG  
GCAGGGTGTATGCTATTGCATTGCACAGTATATACGATATACCTGCAGATGAATTCGGAGCGGCACTTTTAAG  
GAAAAATGTCCATGTTTGTACGCCGCTTCCACTTTTCCGAGAATTTACTTCTCGAAGATTCACACGTCAACCT  
TGACGAAATCAACGCGTGTTTTTCGCGTGATGGAGACAAGCTGACTTTTTCTTTCGCATCTGAGAGCACTTTAA  
ATTATTGTCATAGTTATTCTAATATTTTAAAATACGTGTGCAAACTTACTTCCCGGCATCTAATAGAGAGGTCT  
ACATGAAGGAGTTTTTGGTCACCAGGGTTAACACCTGGTTTTGTAAAGTTTTCTAGGATAGATACTTTTTTATTAT  
ACAAGGGGGTAGCCCAAAAGGTGTAAATAGTGAGCAATTTTACAGCGCAATGGAAGATGCATGGCACTACA  
AAAAGACTCTTGCAATGTGTAACAGCGAGAGGATTCTTCTGAAGATTCCTCATCGGTCAATTACTGGTCCCA  
AAAATGAGAGATATGGTCATAGTTCTCTATTGACATATCTCTCGACACCAGTAAAAGGACCCGCAAAGAAG  
TCTTAGTGCAAAGGATTTTGTATTACAGTTTTAAATCACATTCGCACTTATCAAGCCAAGGCACTTACATACT  
CCAATGTTTTATCCTTTGTGAATCAATTCGTTCAAGGGTAATTATCAACGGAGTGACTGCCAGGTCTGAGTGG  
GATGTTGACAAATCTTTTTGCAATCCTTGTCATGACATTTTTCTTGCATACTAAGCTTGCCGTTTTAAAAGAC  
GAATTGTTAATCAGCAAGTTTAGTTTGGGGCCAAAATCAGTAAGCCAGCATGTATGGGATGAGATTTCCCTGG  
CTTTTGAAACGCATTTCCATCGATCAAGGAGAGACTGCTAAATCGGAACTAATTAAGTGTCGGGAGACGC  
ATTAGAAATCAGGGTGCCTGATTTATATGTGACTTTTACGATAGATTAGTGACTGAGTACAAAACATCGGTG  
GAAATGCCAGTGCTTGATATCAGAAAGAGAATGGAGGAGACTGAGGTTATGTACAATGCATTGTCTGAGCTA  
TCTGTGCTCAAGGAGTCGGACAAGTTCGACGTAGATGTTTTTCCCGGATGTGCCAGACTTTGGAGGTAGACC  
CAATGACTGCAGCAAAGGTTATTGTGGCAGTGATGAGCAACGAGAGCGGACTGACTCTTACATTGCAACAGC  
CAACTGAAGCAAATGTGCGATTGGCACTTAAAGATTGAGAAAAAGCCTCTGAGGGTGCAGTGTGTTACTTC  
TAGAGATGTTGAAGAACCATCCATGAAGGGTTCAATGGCAAGAGGAGATTACAATTGGCCGGTCTGTCTGG  
AGACCAACCAGAGTCTTCTATACTCGGAACGAGGAAATAGAGTCATTAGAGCAATTCCACATGGCAACGGCT  
AGTTCGTTAATTCGGAACAGATGAGTTCGATTGTGTACACGGGCCCCATTAAAGTTCAGCAAATGAAAACT  
TTATTGATAGCCTGGTAGCATCACTCTCTGCTGCGGTGTCGAACCTAGTCAAGATCCTAAAGGATACAGCTGCT  
ATAGATCTCGAAACCCGTCAGAAGTTTGGAGTCTTAGATGTTGCGACCAAAGATGGTTAATTAACCTTTAG  
CCAAGAATCACGCATGGGGCGTTATTGAAACACATGC-  
AGGAAGTACCACGTTGCACTTTTGGAGTATGATGAGCATGGAGTGGTAACTTGCGACAGTTGGAGAAGGGTG  
GCCGTGAGTTCTGAGTCAATGGTTTATTCTGATATGGCAAAGCTCAGAACTGAGGAGATTATTAAGAGATG  
GAGAGCCTCATGTCAGCAGTGCTAAAGTCGTCTAGTTGACGGTGTCCCGGGTGTGGAAAGACAAAAGAGA  
TTCTCTCGAAAGTAAATTTTGGAGGAAGATCTAATCTTAGTACCGGGTAAGCAGGCTGCTGAAATGATAAGAG  
GCGTGCTAATGCGTCAGGAATAATTCAAGCCACAAGAGATAATGTTCTGACTGTTGATTCAATTTATAATGAATT  
ACGGTAAAGGAACACGCTGTCAGTTCAAAAGGTTATTATCGACGAAGGTCTGATGTTGCACACTGGTTGTGT

GAATTTTCTTGTCTCTATGTCTCTGTGCGAAATTGCATATGTTTATGGAGACACACAACAAATTCCATACATCAA  
CAGAGTATCCGGTTTTCCGTACCTGCACATTTTGCAAAAATAGAGGTTGATGAGGTGGAACTCGCAGAACT  
ACGCTGCGTTGTCCAGCCGACATTACCCACTATCTTAACAGAAGGTACGAAGGACATGTCATGTGTACATCGT  
CGGTTAAAAAGTCAGTTTCTCAGGAAATGGTGAGCGGGGCCGAATGATCAATCCTGTATCTAAGCCATTGAA  
TGGGAAAGTTTTGACTTTCACTCAGTCTGATAAAGAGGCGCTGCTTTCTCGAGGATATACGGACGTCCATACA  
GTACATGAGGTACAAGGTGAGACATATGCAGATGTGTCGTTGGTCAGATTGACTCCGACACCTGTATCTATCA  
TCGCAGGAGATAGTCCGCACGTTCTCGTAGCTTTGTCAAGGCATACCCAAACATTGAAGTATTACACCGTAGT  
GATGGATCCTCTTGTAAAGTATAATTAGGGATTTAGAAAACTTAGTTCTTACTTGTTAGATATGTATAAAGTAG  
ATGCAGGGACCCAATAGCAATTACAGGTAGACTCCGTGTTAAAGGTTCTAATCTTTTTGTTGCAGCACCAAA  
GACTGGAGATATCTCAGATATGCAATTTTACTATGATAAGTGTCTCCAGGTAATAGCACCATGTTAAATAACT  
ATGATGCTGTTACCATGAGGTTGACTGACATTTCTCTTAATGTCAAAGATTGCATATTGGATTTCTCTAAGTCTG  
TGGCTGCACCGAAGGATCCGATCAAACCACTGATTCCAATGGTACGAACGGCGGCAGAAATGCCACGCCAGA  
CTGGACTATTGGAAAATTTGGTGGCGATGATCAAAAGAACTTTAATTCACCGGAGTTATCGGGAATAATCGA  
CATTGAGAATACTGCATCTTTAGTAGTAGATAAATTTTTGATAGTTACTTGCTTAAAGAAAAAAGAAAAACCA  
ATAAAAAATGTTTCTTTATTTGTAGAGAGTCTCTCAATAGATGGTTAGAGAAGCAGGAGCAAGTGACCATTGG  
TCAGCTTGAGATTTTGATTTGTGGATCTTCTGCCGTTGATCAGTACAGGCATATGATTAAAGCGCAACCTA  
AGCAGAAGCTGGATACATCAATCAAAGCGAATATCCGGCCTGCAGACGATTGTGTATCATTGAAAAAGAT  
CAACGCAATCTTCGGTCTTTGTTCAGTGAGCTCACAAGGCAAATGCTCGAAAGCATAGACTCAAGTAAGTTT  
TGTTCTTTACAAGGAAGACGCCAGCTCAAATTGAGGATTTCTTCGGAGATCTCGATAGCCATGTCCCTATGGAT  
ATCTTGAGATTGGATATTTGGAAGTATGACAAATCTCAGAACGAGTTCCTGTGCAGTAGAGTATGAAATAT  
GGAGAAGACTTGGATTAGAAGATTTCTGGGAGAAGTTGGAAACAAGGCCACAGGAAAACTACTCTTAAAG  
ATTACACAGCTGGTATTAACCGTGTATTTATGGTACCAGAGAAAGAGTGGGGACGTTACAACATTCATCGGTAA  
TACGGTGATTATTGCTGCTTGTAGCTTCCATGTTGCCCATGGAGAAAATAATCAAAGGTGCATTTTGC GGAG  
ATGACAGTTTACTATACTTCCCAAAGGTTGTGAGTTTCTGACATACAGCATAACGCCAACCTTATGTGGAAT  
TTCGAGGCTAAGCTATTCAGAAAGCAGTATGGTTATTTCTGTGGAAGGTACGTGATACATCATGACAGAGGGT  
GTATTGTTTATTATGACCCTTTGAAGTTGATTTCTAAACTTGGTGCTAAACACATCAAGGATTGGGATCACTTA  
GAAGAGTTCAGAAGATCCCTTTGTGATGTTGCAAATTCGTTGAACAACTGTGCGTATTACACGCAGTTGGACG  
ACGCTGTGAGTGAGGTCCATAAAACCGCACCCCCGGGTTGTTTGTATATAAAAGTTTAGTTAAATATCTGTCC  
GATAAGGTTCTTTTAGAAGTTTGTATATAGATGGCTCTTGTAAAGGGTAAAGTCAATATTAATGAGTTCATAG  
ACTTGTCAAATCAGAAAAATTTCTCCGTCTATGTTACACCTGTTAAGAGTGCATGATCTCCAAGGTTGAT  
AAGATATTGGTTCATGAAGATGAATCTTTGTCCGAAGTCAATTTACTCAAAGGTGTAACCTCATTGATGGTG  
GCTATGTACATCTTGCTGGTCTTGTGGTGACAGGTGAATGGAATTTGCCAGATAATTGTCGTGGTGGTGTCAG  
TGTCTGTTTGGTCGATAAGAGAATGGAGAGAGCGGACGAGGCAACTCTTGCTTCATACTATACCGCAGCGGC  
TAAGAAAAGGTTTCAGTTCAAAGTCGTTCAAATTACAACATCACTACCAAGGACGCAGAAAAGGCAGTTTGG  
CAAGTACTAGTTAATATTAGAAATGTTAAATGCTGCGGGTACTGTCCGCTGTCATTAGAATTTGTGTCAGT  
GTGTATTGTTTATAAAAAATATTATAAACTCGGTTTGAGAGAGAAAATTACGAGCGTCACGGATGGAGGGCCC  
ATGGAATATCAGAAGAAGTTGTTGATGAGTTCATGGAAGAAGTCCCGATGTCTGTAAGGCTTGCAAAATTC  
GTTGCAAGACCGGAAAAAAGTTTAGTAGTAAAAGTGAGAATAATAGTGGTAATAATAGGCCGAAACCAAACA  
AAA-  
CCAAAGGAAGGAAAAGGGTTTAAAAGTTAGGGTTGAGAAGGATAATTTAATTGATAATGAATTGGAGACTTA  
CGTCGCCGATTGAGATTCGTATTAAATATGTCTTACACAATCGCAACTCCATCGCAATTTGTGTTTTTGTATCA  
GCATGGGCCGACCCTATAGAATTAATAAATTTATGTACTAATCACTAGGTAATCAGTTCCAAACACAACAAGC  
TAGAACAACCGTTCAACGGCAATTTAGCGAAGTGTGGAAACCTGTCCCTCAAGTCACTGTTAGGTTTCTGAC  
AGTGGTTTTAAGGTGTATAGGTACAATGCGGTACTAGATCCTCTAGTTACTGCTTTGTTAGGAGCTTTCGATAC  
TAGAAATAGGATTATAGAAGTCGAAAATCAGGCGAACCCGACAACCGCCGAAACGTTAGACGCTACTCGTAG  
AGTAGATGACGCAACGGTGGCTATAAGGAGCGCTATAAATAATTTAGTAGTAGAATTGGTCAAAGGAACAGG  
TTTGTACAATCAGAGCACATTTGAAAGTGCATCCGGTTTACAATGGTCTCTGCACCTGCATCTTGA



MK319944

ATGGCATACACACAGACAGCTACCACATCCGCTTTGCTCGACACTGTCCGAGGTAACAATACCTTGGTCAACG  
ATCTTGCGAAGCGGCGTCTTTATGACACAGCGGTGACGAGTTCAACGCTCGTGATCGCAGGCCCAAAGTAA  
ATTTTTCCAAAGTAATAAGTGAGGAACAGACGCTTATTGCTACTAGGGCATATCCAGAATTCAGATAACCTTC  
TATAATACGCAGAACGCCGTGCATTGCTTGCCGGTGGACTACGATCCTTAGAACTGGAATATCTAATGATGC  
AGATCCCGTACGGATCACTCACATATGATATAGGTGGGAATTTTGCATCTCATCTGTTCAAAGGACGGGCATA  
TGTTCACTGCTGTATGCCCAATCTTGATGTCCGCGACATAATGCGGCACGAAGGCCAGAAAGACAGTATAGAA  
TTATACCTTTCCAGGCTTGAGCGGGGCAACAAAGTTGTCCCAAATTTCCAAAAGGAAGCTTTTGACAGATACG  
CTGAAACGCCAGACGAAGTTGTCTGTACAGTACCTTCCAAACGTGTACGCACCAGCAGGTGGAAAACACAG  
GCAGGGTGTATGCTATTGCATTGCACAGTATATACGATATACCTGCTGATGAATTCGGAGCGGCACTTTTAAG  
AAAAATGTCCATGTTTGTTACGCCGCTTCCACTTTTCCGAGAATTTACTTCTCGAAGATTCACACGTCAACCT  
TGACGAAATCAACGCGTGTTTTTCGCGTGATGGAGACAAGCTGACTTTTTCTTTCGCATCTGAGAGCACTTTAA  
ATTATTGTCATAGTTATTCTAATATTTTAAAATACGTGTGCAAACTTACTTCCCGGCATCTAATAGAGAGGTCT  
ACATGAAGGAGTTTTTGGTCACCAGGGTTAACACCTGGTTTTGTAAGTTTTCTAGGATAGATACTTTTTTATTAT  
ACAAGGGGGTAGCCCAAAAGGTGTAAATAGTGAGCAATTTTACAGCGCAATGGAAGATGCATGGCACTACA  
AAAAGACTCTTGCAATGTGTAACAGCGAGAGGATTCTTCTGAAGATTCCTCATCGGTCAATTACTGGTCCCA  
AAAATGAGAGATATGGTCATAGTTCTCTATTGACATATCTCTCGACACCAGTAAAAGGACCCGCAAAGAAG  
TCTTAGTGCAAAGGATTTTGTATTACAGTTCTAAATCACATTCGCACTTATCAAGCCAAGGCACTTACATACT  
CCAATGTTTTATCCTTTGTGAATCAATTCGTTCAAGGGTAATTATCAACGGAGTGACTGCCAGGTCTGAGTGG  
GATGTTGACAAATCTTTTTGCAATCCTTGTCATGACATTTTTCTTGCATACTAAGCTTGCCGTTTTAAAAGAC  
GAATTGTTAATCAGCAAGTTTAGTTTGGGGCCAAAATCAGTAAGCCAGCATGTATGGGATGAGATTTCCCTGG  
CTTTTGAAACGCATTTCCATCGATCAAGGAGAGACTGCTAAATCGGAACTAATTAAGTGTCGGGAGACGC  
ATTAGAAATCAGGGTGCCTGATTTATATGTGACTTTTACGATAGATTAGTGACTGAGTACAAAACATCGGTG  
GATATGCCAGTGCTTGATATCAGAAAGAGAATGGAGGAGACTGAGGTTATGTACAATGCATTGTCTGAGCTA  
TCTGTGCTCAAGGAGTCGGACAAGTTGACGTTGATGTTTTTCCCGGATGTGCCAGACTTTGGAGGTAGACC  
CAATGACTGCAGCAAAGGTTATTGTGGCAGTGATGAGCAACGAGAGCGGACTGACTCTCACATTCCGACAGC  
CAACTGAAGCAAATGTCGATTGGCACTTAAAGATTGAGAAAAAGCCTCTGAGGGTGCCTAGTGTTACTTC  
TAGAGATGTTGAAGAACCATCCATGAAGGGTTCAATGGCAAGAGGAGATTACAATTGGCCGGTCTGTCTGG  
AGACCAACCAGAGTCTTCTATACTCGGAACGAGGAAATAGAGTCATTAGAGCAATTCCACATGGCAACGGCT  
AGTTCGTTAATTCGGAACAGATGAGTTCGATTGTGTACACGGGCCCATTAAGTTGAGCAAATGAAAACT  
TTATTGATAGCCTGGTAGCATCACTCTCTGCTGCGGTGTGCAACCTAGTCAAGATCCTAAAGGATACAGCTGCT  
ATAGATCTCGAAACCCGTCAGAAGTTTGGAGTCTTAGATGTTGCGACCAAAGATGGTTAATTAACCTTTAG  
CCAAGAATCACGCATGGGGCGTTATTGAAACACATGCTAGGAAGTACCAGTTGCACTTTTGGAGTATGATGA  
GCATGGAGTGGTAACTTGCGACAGTTGGAGAAGGGTGGCCGTGAGTTCTGAGTCAATGGTTTATTCTGATAT  
GGCAAAGCTCAGAACACTGAGGAGATTATTAAGAGATGGTGAGCCTCATGTCAGCAGTGCTAAAGTCGTCT  
AGTTGACGGTGTCCCGGGTTGTGGAAAGACAAAAGAGATTCTCTCGAAAGTAAATTTTGAGGAAGATCTAAT  
CTTAGTACCGGGTAAGCAGGCTGCTGAAATGATAAAGAGGCGTGCTAATGCGTCAGGAATAATTCAAGCCAC  
AAGAGATAATGTTCTGACTGTTGATTCAATTTATAATGAATTACGGTAAAGGAACACGCTGTCAGTTCAAAGG  
TTATTTATCGACGAAGGTCTGATGTTGCACACTGGTTGTGTGAATTTTCTGTTTCTATGTCTCTGTGCGAAAT  
GCATATGTTTATGGAGACACACAACAAATTCATACATCAACAGAGTATCCGGTTTTCCGTACCCTGCACATTT  
TGCAAAAATAGAGGTTGATGAGGTGGAACTCGCAGAACTACGCTGCGTTGTCCAGCCGACATTACCCACTAT  
CTTAACAGAAGGTACGAAGGACATGTCATGTGTACATCGTCGGTTAAAAAGTCAGTTTCTCAGGAAATGGTGA  
GCGGGGCCGCAATGATCAATCCTGTATCTAAGCCATTGAATGGGAAAGTTTGACTTTCACTCAGTCTGATAA  
AGAGGCGCTGCTTCTCGAGGATATACGGACGTCCATACAGTACATGAGGTACAAGGTGAGACATATGCAGA  
TGTGTGCTTGGTCAGATTGACTCCGACACCTGTATCTATTATCGCAGGAGATAGTCCGCACGTTCTCGTAGCTT  
TGTCAAGGCATACCCAAACATTGAAGTATTACACCGTAGTGATGGATCCTCTTGAAGTATAATTAGGGATTTA

GAAAACTTAGTTCTTACTTGTTAGATATGTATAAAGTAGATGCAGGGACCCAATAGCAATTACAGGTAGACT  
CCGTGTTTAAAGGTTCTAATCTTTTTGTTGCAGCACCAAGACTGGAGATATCTCAGATATGCAATTTTACTAT  
GATAAGTGTCTCCAGGTAATAGCACCATGTTAAATACTATGATGCTGTTACCATGAGGTTGACTGACATTC  
TCTTAATGTCAAAGATTGCATATTGGATTTCTCTAAGTCTGTGGCTGCACCGAAGGATCCGATCAAACCACTGA  
TTCCAATGGTACGAACGGCGGCAGAAATGCCACGCCAGACTGGACTATTGGAAAATTTGGTGGCGATGATCA  
AAAGAACTTTAATTCACCGGAGTTATCAGGAATAATCGACATTGAGAATACTGCATCTTTAGTAGTAGATAA  
ATTTTTGATAGTTACTTGCTTAAAGAAAAAGAAAACCAAATAAAAATGTTTCTTTATTTGTAGAGAGTCTCT  
CAATAGATGGTTAGAGAAGCAGGAGCAAGTGACCATTGGTCAGCTTGCAGATTTTGATTTGTGGATCTTCTCT  
GCCGTTGATCAGTACAGGCATATGATTAAAGCGCAACCTAAGCAGAAGCTGGATACATCAATTCAAAGCGAAT  
ATCCGGCCTTGCAGACGATTGTGTATCATTGAAAAAGATCAACGCAATCTTCGGTCTTTGTTGAGTGAGCTC  
ACAAGGCAAATGCTCGAAAGCATAGACTCAAGTAAGTTTTGTTCTTTACAAGGAAGACGCCAGCTCAAATTG  
AGGATTTCTTCGGAGATCTCGATAGCCATGTCCCTATGGATATCTTGAGTTGGATATTTGGAAGTATGACAAA  
TCTCAGAACGAGTTCCACTGTGCAGTAGAGTATGAAATATGGAGAAGACTTGGATTAGAAGATTTTCTGGGA  
GAAGTTTGGAACAAGGCCACAGGAAAACCTACTCTTAAAGATTACACAGCTGGTATTAACCGTGTTTATGGT  
ACCAGAGAAAAGAGTGGGGACGTTACAACATTCATCGGTAATACGGTGATTATTGCTGCTTGTTAGCTTCCAT  
GTTGCCCATGGAGAAAATAATCAAAGGTGCATTTTTCGGAGATGACAGTTTACTATACTTCCAAAAGGTTGT  
GAGTTTCTTGACATACAGCATACAGCCAACCTTATGTGGAATTTGAGGCTAAGCTATTCAGAAAGCAGTATG  
GTTATTTCTGTGGAAGGTACGTGATACATCATGACAGAGGGTGTATTGTTTATTATGACCTTTGAAGTTGATT  
TCTAACTTGGTGCTAAACACATCAAGGATTGGGATCACTTAGAAGAGTTCAGAAGATCCCTTTGTGATGTTG  
CAAATTCGTTGAACAACTGTGCGTATTACACGCAGTTGGACGACGCTGTGAGTGAGGTCCATAAACCGCACC  
CCCGGGTTCGTTTGATATAAAAGTTTGTAAATATCTGTCCGATAAGGTTCTTTTGAAGTTTGTATAGA  
TGGCTCTTGTTAAGGGTAAAGTCAATATTAATGAGTTCATAGACTTGTCAAAATCAGAAAAATTTCTCCGTCT  
ATGTTACACCTGTTAAGAGTGTGATGATCTCCAAGGTTGATAAGATATTGGTTCATGAAGATGAATCTTTGTC  
CGAAGTCAATTTACTCAAAGGTGTAAACTCATTGATGGTGGCTATGTACATCTTGCTGGTCTTGTTGGTGACA  
GGTGAATGGAATTTGCCAGATAATTGTCGTGGTGGTGTGAGTGTCTGTTTGGTCGATAAGAGAATGGAGAGA  
GCGGACGAGGCAACTCTTGCTTCACTATACCGCAGCGGCTAAGAAAAGGTTTCAGTTCAAAGTCGTTCCAA  
ATTACAACATCACTACCAAGGACGCAGAAAAGGCAGTTTGGCAAGTACTAGTTAATATTAGAAATGTTAAAT  
TGCTGCGGGTACTGTCCGCTGTCATTAGAATTTGTGTGAGTGTGATTGTTTATAAAAATATTATAAACTCG  
GTTTGAGAGAGAAAATTACGAGCGTCACGGATGGAGGGCCCATGGAAGTATCAGAAGAAGTTGTTGATGAG  
TTCATGGAAGAAGTCCCGATGTCTGTAAGGCTTGCAAAATTTGTTTGAAGACCGGAAAAAGTTTAGTAGTA  
AAAGTGAGAATAATAGTGGTAATAATAGGCCGAAACCAAACAAAAACCAAAGGAAGGAAAAGGGTTAAAA  
GTTAGGGTTGAGAAGGATAATTTAATTGATAATGAATTGGAGACTTACGTCGCCGATTCAGATTCGTATTA  
TATGTCTTACACAATCGCAACTCCATCGCAATTTGTGTTTTGTGTCATCAGCATGGGCCGACCCTATAGAATTA  
AAATTTATGTACTAATTCAGTAAATCAGTTCCAAACACAACAAGCTAGAACAACCGTTCAACGCAATTTA  
GCGAAGTGTGGAACCTGTCCCTCAAGTCACTGTTAGGTTTCTGACAGTGGTTTAAAGGTGTATAGGTACAA  
TGCGGTACTAGATCCTCTAGTTACTGCTTTGTTAGGAGCTTCGATACTAGAAATAGGATTATAGAAGTCGAAA  
ATCAGGCGAACCCGACAACCGCCGAAACGTTAGACGCTACTCGTAGAGTAGATGACGCAACGGTGGCTATAA  
GGAGCGCTATAAATAATTTAGTAGTAGAATTGGTCAAAGGAACAGGTTTGTACAATCAGAGCACATTTGAAA  
GTGCATCCGGTTACAATGGTCCTCTGCACCTGCATCTTGA

MN167466

ATGGCATACACACAGACAGCTACCACATCCGCTTTGCTCGACACTGTCCGAGGTAACAATACCTTGGTCAACG  
ATCTTGCGAAGCGGCGTCTTTATGACACAGCGGTGACGAGTTCAACGCTCGTGATCGCAGGCCCAAAGTAA  
ATTTTCCAAAGTAATAAGTGAGGAACAGACGCTTATTGCTACTAGGGCATATCCAGAATTCCAGATAACCTTC  
TATAATACGCAGAACGCCGTGCATTGCTTCCGGTGGACTACGATCCTTAGAACTGGAATATCTAATGATGC  
AGATCCCGTACGGATCACTCACATATGATATAGGTGGGAATTTGCATCTCATCTGTTCAAAGGACGGGCATA

TGTTCACTGCTGTATGCCCAATCTTGATGTCCGCGACATAATGCGGCACGAAGGCCAGAAAGACAGTATAGAA  
TTATACCTTTCCAGGCTTGAGCGGGGCAACAAAGTTGTCCCAAATTTCCAAAAGGAAGCTTTTGACAGATACG  
CTGAAACGCCAGACGAAGTTGTCTGTACAGTACCTTCCAAACGTGTACTCAGCAGCAGGTGGAAAACACAG  
GCAGGGTGTATGCTATTGCACTGTACAGTATATACGATATACCTGCTGATGAATTCGGAGCGGCACTTTTAAG  
GAAAAATGTCCATGTTTGTTACGCCGCCTTCCACTTTTCCGAGAATTTACTTCTCGAAGATTCACATGTCAACCT  
TGACGAAATCAATGCGTGTTTTTCGCGTGATGGAGACAAGCTGACTTTTTCTTTCGCATCTGAGAGCACTTTAA  
ATTATTGTCATAGTTATTCTAATATTTTAAAATACGTGTGCAAACTTACTTCCCAGGCATCTAATAGAGAGGTCT  
ACATGAAGGAGTTTTTGGTCACCAGGGTTAACACCTGGTTTTGTAAGTTTTCTAGGATAGATACTTTTTTATTAT  
ACAAGGGGGTAGCCCAACAAAGGTGTAAATAGTGAGCAATTTTACAGCGCAATGGAAGATGCATGGCACTACA  
AAAAGACTCTTGCAATGTGTAAACAGCGAGAGGATTCTTCTTGAAGATTCCTCATCGGTCAATTACTGGTTCCCA  
AAAATGAGAGATATGGTCATAGTTCCTCTATTTCGACATATCTCTCGACACCAGTAAAAGGACCCGCAAGAAG  
TCTTAGTGTCAAAGGATTTTGTATTACAGTTTTAAATCACATTCGCACTTATCAAGCCAAGGCACTTACATACT  
CCAATGTTTTATCCTTTGTGCAATCAATTCGATCAAGGGTAATTATCAACGGAGTGACTGCCAGGTCTGAGTGG  
GATGTTGACAAATCTTTTTGCAATCCTTGTCATGACATTTTTCTTGCATACTAAGCTTGCCGTTTTAAAAGAC  
GAATTGTTAATCAGCAAGTTTAGTTTGGGGCCAAAATCAGTAAGCCAGCATGTATGGGATGAGATTTCCCTGG  
CTTTTGAAACGCATTTCCATCGATCAAGGAGAGACTGCTAAATCGGAACTAATTAAGTGTCGGGAGACGC  
ATTAGAAATCAGGGTGCCTGATTTATATGTGACTTTTACGATAGATTAGTGACTGAGTACAAAACATCGGTG  
GATATGCCAGTGCTTGATATCAGAAAGAGAATGGAGGAGACTGAGGTTATGTACAATGCATTGTCTGAGCTA  
TCTGTGCTCAAGGAGTCGGACAAGTTTCGACGTTGATGTTTTTCCCAGGATGTGCCAGACTTTGGAGGTAGACC  
CAATGACTGCAGCAAAGGTTATTGTGGCAGTGATGAGCAACGAGAGCGGACTGACTCTTACATTGCAACAGC  
CAACTGAAGCAAATGTCGATTGGCACTTAAAGATTAGAAAAAGCCTCTGAGGGTGAAGTGGTTACTTC  
TAGAGATGTTGAAGAACCATCCATGAAGGGTTCATGGCAAGAGGAGAGTTACAATTGGCCGGTCTGTCTGG  
AGACCAACCAGAGTCTTCTATACTCGGAACGAGGAAATAGAGTCATTAGAGCAATTCACATGGCAACGGCT  
AGTTCGTTAATTCGGAAACAGATGAGTTCGATTGTGTACACGGGCCCATTAAGTTTCAGCAAATGAAAACT  
TTATTGATAGCCTGGTAGCATCACTCTCTGCTGCGGTGTGCAACCTAGTCAAGATCCTAAAGGATACAGCTGCT  
ATAGATCTCGAAACCCGTCAGAAGTTTGGAGTCTTAGATGTTGCGACCAAAGATGGTTAATTAACCTTTAG  
CCAAGAATCACGCATGGGGCGTTATTGAAACACATGCTAGGAAGTACCACGTTGCACTTTTGGAGTATGATGA  
GCATGGAGTGGTAACTTGCGACAGTTGGAGAAGGGTGGCCGTGAGTTCTGAGTCAATGGTTTATTCTGATAT  
GGCAAAGCTCAGAACTGAGGAGATTATTAAGAGATGGTGAGCCTCATGTCAGCAGTGCTAAAGTCGTCT  
AGTTGACGGTGTCCCGGGTTGTGGAAAGACAAAAGAGATTCTCTCGAAAGTAAATTTGAGGAAGATCTAAT  
CTTAGTACCGGTAAGCAGGCTGCTGAAATGATAAAGAGGCGTGCTAATGCGTCAGGAATAATTCAAGCCAC  
AAGAGATAATGTTCTGACTGTTGATTCAATTATAATGAATTACGGTAAAGGAACACGCTGTCAGTTCAAAGG  
TTATTTATCGACGAAGGTCTGATGTTGCACACTGGTTGTGTGAATTTCTTGTCTATGTCTCTGTGCGAAATT  
GCATATGTTTATGGAGACACACAACAAATTCCATACATCAACAGAGTATCCGTTTTCCGTACCCTGCACATTT  
TGCAAAAATAGAGTTGATGAGGTGGAACTCGCAGAACTACGCTGCGTTGTCCAGCCGACATTACCACTAT  
CTTAACAGAAGGTACGAAGGATATGTCATGTGTACATCGTCGGTTAAAAAGTCAGTTTCTCAGGAAATGGTGA  
GCGGGGCCGCAATGATCAATCCTGTATCTAAGCCATTGAATGGGAAAGTTTTGACTTTCACTCAGTCTGATAA  
AGAGGCGCTGCTTCTCGAGGATATACGGACGTCCATACAGTACATGAGGTACAAGGTGAGACATATGCAGA  
TGTGTGCTTGGTCAGATTGACTCCGACACCTGTATCTATCATCGCAGGAGATAGTCCGCACGTTCTCGTAGCTT  
TGTCAAGGCATACCCAAACATTGAAGTATTACACCGTAGTGATGGATCCTCTTGAAGTATAAATTAGGGATTTA  
GAAAACTTAGTTCTTACTTATTAGATATGTATAAAGTAGATGCAGGGACCCAATAGCAATTACAGGTAGACT  
CCGTGTTTAAAGGTTCTAATCTTTTTGTTGCAGCACCAAGACTGGAGATATCTCAGATATGCAATTTTACTAT  
GATAAGTGCTCCCAGGTAATAGCACCATGTTAAATAACTATGATGCTGTTACCATGAGGTTGACTGACATTT  
TCTTAATGTCAAAGATTGCATATTGGATTTCTCTAAGTCTGTGTCTGCACCGAAGGATCCGATCAAACCACTGA  
TTCCAATGGTACGAACGGCGGCAGAAATGCCACGCCAGACTGGACTATTGGAAAATTTGGTGGCGATGATCA  
AAAGAACTTTAATTCACCGGAGTTATCAGGAATAATCGACATTGAGAATACTGCATCTTTAGTAGTAGATAA  
ATTTTTGATAGTTACTTGCTTAAAGAAAAAAGAAAAACCAATAAAAAATGTTTCTTTATTTGTAGAGAGTCTCT  
CAATAGATGGTTAGAGAAGCAGGAGCAAGTGACCATTGGTCAGTTGCAGATTTTGATTTTGTGGATCTTCTCT

GCCGTTGATCAGTACAGGCATATGATTAAAGCGCAACCTAAGCAGAAGCTGGATACATCAATTCAAAGCGAAT  
ATCCGGCCTTGACAGACGATTGTGTATCATTGAAAAAGATCAACGCAATCTTCGGTCCTTTGTTTCAGTGAGCTC  
ACAAGGCAAATGCTCGAAAGCATAGACTCAAGTAAGTTTTTGTCTTTACAAGGAAGACGCCAGCTCAAATTG  
AGGATTTCTTCGGAGATCTCGATAGCCATGTCCCTATGGATATCTTGGAGTTGGATATTTTGAAGTATGACAAA  
TCTCAGAACGAGTTCCACTGTGACGTAGAGTATGAAATATGGAGAAGACTTGGATTAGAAGATTTTCTGGGA  
GAAGTTTGGAACAAGGCCACAGGAAAACTACTCTTAAAGATTACACAGCTGGTATTAACGTTGTTTATGGT  
ACCAGAGAAAGAGTGGGGACGTTACAACATTCATCGGTAATACGGTGATTATTGCTGCTTGTGTTAGCTTCCAT  
GTTACCCATGGAGAAAATAATCAAAGGTGCATTTTGCGGAGATGACAGTTTACTATACTTCCCAAAGGTTGT  
GAGTTTCTGACATACAGCATACAGCCAACCTTATGTGGAATTTGAGGCTAAGCTATTCAGAAAGCAGTATG  
GTTATTTCTGTGGAAGGTACGTGATACATCACGACAGAGGGTGTATTGTTTATTATGACCTTTGAAGTTGATT  
TCTAACTTGGTGCTAAACACATCAAGGATTGGGATCACTTAGAAGAGTTCAGAAGATCCCTTTGTGATGTTG  
CAAATTCGTTGAACAACCTGTGCGTATTACACGCAGTTGGACGACGCTGTGAGTGAGGTCCATAAAACCGCACC  
CCCGGGTTCGTTTGATATAAAAGTTAGTTAAATATCTGTCCGATAAGGTTCTTTTAGAAGTTTGTGTTATAGA  
TGGCTCTTGTTAAGGGTAAAGTCAATATTAATGAGTTCATAGACTTGTCAAATCAGAAAAATTTCTCCGTCT  
ATGTTACACCTGTTAAGAGTGTGATGATCTCAAGGTTGATAAGATATTGGTTCATGAAGATGAATCTTTGTC  
CGAAGTCAATTTACTCAAAGGTGTAACCTCATTGATGGTGGCTATGTACATCTTGCTGGTCTGTGGTGACA  
GGTGAATGGAATTTGCCAGATAATTGTCGTGGTGGTGTGAGTGTCTGTTTGGTCGATAAGAGAATGGAGAGA  
GCGGACGAGGCAACTCTTGCTTCACTATACCGCAGCGGCTAAGAAAAGGTTTCAGTTCAAAGTCGTTCCAA  
ATTACAACATCACTACCAAGGACGCAGAAAAAGGCAGTTTGGCAAGTACTAGTTAATATTAGAAATGTTAAAT  
TGCTGCGGGTACTGTCCGCTGTCATTAGAATTTGTGTGAGTGTGATTGTTTATAAAAATATTATAAACTCG  
GTTTGAGAGAGAAAATTACGAGCGTCACGGATGGAGGGCCCATGGAATATCAGAAGAAGTTGTTGATGAG  
TTCATGGAAGAAGTCCCGATGTCTGTAAGGCTTGCAAAATTTGTTTGAAGACCGGAAAAAGTTTAGTAGTA  
AAAGTGAGAATAATAGTGGTAATAATAGGCCGAAACCAGACAAAAACCAAAGGAAGGAAAAAGGGTTAAAA  
GTTAGGGTTGAGAAGGATGATTTAATTGATAATGAATTGGAGACTTACGTCGCCGATTGAGATTCGATTAAAA  
TATGTCTTACACAATCGCAACTCCATCGCAATTTGTGTTTTTGTGATCAGCATGGGCCGACCCTATAGAATTAAT  
AAATTTATGTACTAATCACTAGGTAATCAGTTCCAAACACAACAAGCTAGAACAACCGTTCAACGGCAATTTA  
GCGAAGTGTGGAACCTGTCCCTCAAGACACTGTTAGGTTTCTGACAGTGGTTTTAAGGTGTATAGGTACAA  
TGCGGTACTAGATCCTCTAGTTACTGCTTTGTTAGGAGCTTTCGATACTAGAAATAGGATTATAGAAGTCGAAA  
ATCAGGCGAACCCGACAACCGCCGAAACGTTAGACGCTACTCGTAGAGTAGATGACGCAACGGTGGCTATAA  
GGAGCGCTATAAATAATTTAGTAGTAGAATTGGTCAAAGGAACAGGTTTGTACAATCAGAGCACATTTGAAA  
GTGCATCCGGTTTACAATGGTCCTCTGCACCTGCATCTTGA

MN549395

ATGGCATACACACAGACAGCTACCACATCCGCTTTGCTCGACACTGTCCGAGGTAACAATACCTTGGTCAACG  
ATCTTGCGAAGCGGCGTCTTTATGACACAGCGGTGACGAGTTCAACGCTCGTGATCGCAGGCCCAAAGTAA  
ATTTTTCAAAGTAATAAGTGAGGAACAGACGCTTATTGCTACTAGGGCATATCCAGAATTCAGATAACCTTC  
TATAATACGCAGAACGCCGTGCATTCGCTTGCCGGTGGACTACGATCCTTAGAACTGGAATATCTAATGATGC  
AGATCCCGTACGGATCACTCACATATGATATAGGTGGGAATTTTGCATCTCATCTGTTCAAAGGACGGGCATA  
TGTTCACTGCTGTATGCCAATCTTGATGTCCGCGACATAATGCGGCACGAAGGCCAGAAAGACAGTATAGAA  
TTATACCTTTCCAGGCTTGAGCGGGGCAACAAAGTTGTCCCAAATTTCAAAGGAAGCTTTTGACAGATACG  
CTGAAACGCCAGACGAAGTTGTCTGTACAGTACCTTCCAAACGTGTACGCACCAGCAGGTGGAAAACACAG  
GCAGGGTGTATGCTATTGCATTGCACAGTATATACGATATACCTGCTGATGAATTCGGAGCGGCACTTTTAAG  
GAAAAATGTCCATGTTTGTACGCCGCTTCCACTTTTCCGAGAATTTACTTCTCGAAGATTCACACGTCAAACCT  
TGACGAAATCAACGCGTGTGTTTTCGCGTGATGGAGACAAGCTGACTTTTTCTTTCGCATCTGAGAGCACTTTAA  
ATTATTGTCATAGTTATTCTAATATTTTAAAATACGTGTGCAAACTTACTTCCCGGCATCTAATAGAGAGGTCT  
ACATGAAGGAGTTTTTGGTCACCAGGGTTAACACCTGGTTTTGTAAGTTTTCTAGGATAGATACTTTTTTATTAT

ACAAGGGGGTAGCCACAAAGGTGTAATAGTGAGCAATTTTACAGCGCAATGGAAGATGCATGGCACTACA  
AAAAGACTCTTGCAATGTGTAAACAGCGAGAGGATTCTTCTGAAGATTCTCATCGGTCAATTACTGGTTCCCA  
AAAATGAGAGATATGGTCATAGTTCCTCTATTTCGACATATCTCTCGACACCAGTAAAAGGACCCGCAAAGAAG  
TCTTAGTGTCAAAGGATTTTGTATTACAGTTTTAAATCACATTCGCACTTATCAAGCCAAGGCATTACATACT  
CCAATGTTTTATCCTTTGTGAATCAATTCTTCAAGGGTAATTATCAACGGAGTGACTGCCAGGTCTGAGTGG  
GATGTTGACAAATCTTTTGAATCCTTGTCCATGACATTTTTCTTGCACTAAGCTTGCCGTTTTAAAGAC  
GAATTGTTAATCAGCAAGTTTAGTTTGGGGCCAAAATCAGTAAGCCAGCATGTATGGGATGAGATTTCCCTGG  
CTTTTGAAACGCATTTCCATCGATCAAGGAGAGACTGCTAAATCGGAACTAATTAAGTGTGGGAGACGC  
ATTAGAAATCAGGGTGCCTGATTTATATGTGACTTTTACGATAGATTAGTGACTGAGTACAAAACATCGGTG  
GATATGCCAGTGCTTGATATCAGAAAGAGAATGGAGGAGACTGAGGTTATGTACAATGCATTGTCTGAGCTA  
TCTGTGCTCAAGGAGTCGGACAAGTTCGACGTTGATGTTTTTCCCGATGTGCCAGACTTTGGAGGTAGACC  
CAATGACTGCAGCAAAGGTTATTGTGGCAGTGATGAGCAACGAGAGCGGACTGACTCTCACATTCGAACAGC  
CAACTGAAGCAAATGTCGCATTGGCACTTAAAGATTAGAAAAAGCCTCTGAGGGTGCACTAGTGGTTACTTC  
TAGAGATGTTGAAGAACCATCCATGAAGGGTCAATGGCAAGAGGAGATTACAATTGGCCGGTCTGTCTGG  
AGACCAACCAGAGTCTTCTATACTCGGAACGAGGAAATAGAGTCATTAGAGCAATTCACATGGCAACGGCT  
AGTTCGTTAATTCGGAACAGATGAGTTCGATTGTGTACACGGGCCCATTAAGTTCAGCAAATGAAAACT  
TTATTGATAGCCTGGTAGCATCACTCTCTGCTGCGGTGTGCAACCTAGTCAAGATCCTAAAGGATACAGCTGCT  
ATAGATCTCGAAACCCGTCAGAAGTTTGGAGTCTTAGATGTTGCGACCAAAGATGGTTAATTAACCTTTAG  
CCAAGAATCACGCATGGGGCGTTATTGAAACACATGCTAGGAAGTACCACGTTGCATTTTTGGAGTATGATGA  
GCATGGAGTGGTAACTTGCGACAGTTGGAGAAGGGTGGCCGTGAGTTCTGAGTCAATGGTTTATTCTGATAT  
GGCAAAGCTCAGAACTGAGGAGATTATTAAGAGATGGTGAGCCTCATGTCAGCAGTGCTAAAGTCGTCT  
AGTTGACGGTGTCCCGGGTTGTGGAAAGACAAAAGAGATTCTCTCGAAAGTAAATTTGAGGAAGATCTAAT  
CTTAGTACCGGGTAAGCAGGCTGCTGAAATGATAAAGAGGCGTGCTAATGCGTCAGGAATAATTCAAGCCAC  
AAGAGATAATGTTCTGACTGTTGATTCAATTATAATGAATTACGGTAAAGGAACACGCTGTCAAGTCAAAGG  
TTATTTATCGACGAAGGTCTGATGTTGCACACTGGTTGTGTGAATTTCTTGTCTATGTCTCTATGCGAAAT  
GCATATGTTTATGGAGACACACAACAATTCCATACATCAACAGAGTATCCGGTTTTCCGTACCCTGCACATTT  
TGCAAAAATAGAGGTTGATGAGGTGGAACTCGCAGAACTACGCTGCGTTGTCCAGCCGACATTACCCACTAT  
CTTAACAGAAGGTACGAAGGACATGTCATGTGTACATCGTCCGTTAAAAAGTCAGTTTCTCAGGAAATGGTGA  
GCGGGGCCGCAATGATCAATCCTGTATCTAAGCCATTGAATGGGAAAGTTTTGACTTTCACTCAGTCTGATAA  
AGAGGCGCTGCTTCTCGAGGATATACGGACGTCCATACAGTACATGAGGTACAAGGTGAGACATATGCAGA  
TGTGTCGTTGGTCAGATTGACTCCGACACCTGTATCTATTATCGCAGGAGATAGTCCGCACGTTCTCGTAGCTT  
TGTCAAGGCATACCCAAACATTGAAGTATTACACCGTAGTGATGGATCCTCTTGTAAGTATAATTAGGGATTTA  
GAAAACTTAGTTCTTACTTGTTAGATATGTATAAAGTAGATGCAGGGACCCAATAGCAATTACAGGTAGACT  
CCGTGTTTAAAGGTTCTAATCTTTTTGTTGCAGCACCAAAGACTGGAGATATCTCAGATATGCAATTTTACTAT  
GATAAGTGTCTCCAGGTAATAGCACCATGTTAAATACTATGATGCTGTTACCATGAGGTTGACTGACATTTT  
TCTTAATGTCAAAGATTGCATATTGGATTTCTCTAAGTCTGTGGCTGCACCGAAGGATCCGATCAAACCACTGA  
TTCCAATGGTACGAACGGCGGCAGAAATGCCACGCCAGACTGGACTATTGGAAAATTTGGTGGCGATGATCA  
AAAGAACTTTAATTCACCGGAGTTATCAGGAATAATCGACATTGAGAATACTGCATCTTAGTAGTAGATAA  
ATTTTTGATAGTTACTTGCTTAAAGAAAAAGAAAACCAAATAAAAAATGTTTCTTTATTTGTAGAGAGTCTCT  
CAATAGATGGTTAGAGAAGCAGGAGCAAGTGACCATTGGTCAGCTTGAGATTTTGATTTTGTGGATCTTCTT  
GCCGTTGATCAGTACAGGCATATGATTAAGCGCAACCTAAGCAGAAGCTGGATACATCAATTCAAAGCGAAT  
ATCCGGCCTTGACAGACGATTGTGTATCATTCGAAAAAGATCAACGCAATCTTCGGTCTTTGTTCAAGTACGCTC  
ACAAGGCAAATGCTCGAAAGCATAGACTCAAGTAAGTTTTGTTCTTTACAAGGAAGACGCCAGCTCAAATTG  
AGGATTTCTTCGGAGATCTCGATAGCCATGTCCCTATGGATATCTTGAGTTGGATATTTGGAAGTATGACAAA  
TCTCAGAACGAGTTCCACTGTGCAGTAGAGTATGAAATATGGAGAAGACTTGATTAGAAGATTTTCTGGGA  
GAAGTTTGAAACAAGGCCACAGGAAAACCTCTTAAAGATTACACAGCTGGTATTAACCGTGTATGTTTATGGT  
ACCAGAGAAAGAGTGGGGACGTTACAACATTCATCGGTAATACGGTGATTATTGCTGCTTGTAGCTTCCAT  
GTTGCCCATGGAGAAAATAATCAAAGGTGCATTTTTCGGAGATGACAGTTTACTATACTTCCAAAAGGTTGT

GAGTTTCCTGACATACAGCATACAGCCAACCTTATGTGGAATTTGAGGCTAAGCTATTCAGAAAAGCAGTATG  
GTTATTTCTGTGGAAGGTACGTGATACATCATGACAGAGGGTGTATTGTTTATTATGACCCTTTGAAGTTGATT  
TCTAAACTTGGTGCTAAACACATCAAGGATTGGGATCACTTAGAAGAGTTTCAAGAGATCCCTTTGTGATGTTG  
CAAATTCGTTGAACAACTGTGCGTATTACACGCAGTTGGACGACGCTGTGAGTGAGGTCCATAAAACCGCACC  
CCCGGGTTCGTTTGTATATAAAAGTTTGTAAATATCTGTCCGATAAGGTTCTTTTTAGAAAGTTTGTATAGA  
TGGCTCTTGTTAAGGGTAAAGTCAATATTAATGAGTTCATAGACTTGTCAAATCAGAAAAATTTCTCCGTCT  
ATGTTTACACCTGTTAAGAGTGTGATCTCCAAGGTTGATAAGATATTGGTTCATGAAGATGAATCTTTGTC  
CGAAGTCAATTTACTCAAAGGTGTAAACTCATTGATGGTGGCTATGTACATCTTGCTGGTCTTGTTGAGTACA  
GGTGAATGGAATTTGCCAGATAATTGTCGTGGTGGTGTGAGTGTCTGTTTGGTCGATAAGAGAATGGAGAGA  
GCGGACGAGGCAACTCTTGCTTCATACTATACCGCAGCGGCTAAGAAAAGGTTTCAGTTCAAAGTCGTTCCAA  
ATTACAACATCACTACCAAGGACGCAGAAAAGGCAGTTTGGCAAGTACTAGTTAATATTAGAAATGTTAAAT  
TGCTGCGGGTACTGTCCGCTGTCATTAGAATTTGTGTGAGTGTGATTGTTTATAAAAATATTATAAACTCG  
GTTTGAGAGAGAAAATTACGAGCGTCACGGATGGAGGGCCCATGGAATATCAGAAGAAGTTGTTGATGAG  
TTCATGGAAGAAGTCCCGATGTCTGTAAGGCTTGCAAAATTTCTGTTGGAAGACCGGAAAAAGTTTAGTAGTA  
AAAGTGAGAATAATAGTGGTAATAATAGGCCGAAACCAACAAAAACCAAGGAAGGAAAAGGGTTTAAAA  
ATTAGGGTTGAGAAGGATAATTTAATTGATAATGAATTGGAGACTTACGTCGCCGATTGAGATTCGTATTAAA  
TATGTCTTACACAATCGCAACTCCATCGCAATTTGTGTTTTTGTATCAGCATGGGCCGACCCTATAGAATTAAT  
AAATTTATGTACTAATTCCTAGGTAATCAGTTCCAAACACAACAAGCTAGAACAACCGTTCAACGGCAATTA  
GCGAAGTGTGGAACCTGTCCCTCAAGTCACTGTTAGGTTTCTGACAGTGGTTTTAAGGTGTATAGGTACAA  
TGCGGTACTAGATCCTCTTGTTACTGCTTTGTTAGGAGCTTTCGATACTAGAAATAGGATTATAGAAGTCGAAA  
ATCAGGCGAACCCGACGACCGCCGAAACGTTAGACGCTACTCGTAGAGTAGATGACGCAACGGTGGCTATAA  
GGAGCGCTATAAATAATTTAGTAGTAGAATTGGTCAAAGGAACAGGTTTGTACAATCAGAGCACATTTGAAA  
GTGCATCCGGTTTACAATGGTCCTCTGCACCTGCATCTTGA

MN549396

ATGGCATAACACAGACAGCTACCACATCCGCTTTGCTCGACACTGTCCGAGGTAACAATACCTTGGTCAACG  
ATCTTGCGAAGCGGCGTCTTTATGACACAGCGGTCGACGAGTTCAACGCTCGTGATCGCAGGCCCAAAGTAA  
ATTTTCCAAAGTAATAAGTGAGGAACAGACGCTTATTGCTACTAGGGCATATCCAGAATTCAGATAACCTTC  
TATAATACGCAGAACGCCGTGCATTGCTTGGCGGTGGACTACGATCCTTAGAACTGGAATATCTAATGATGC  
AGATCCCGTACGGATCACTCACATATGATATAGGTGGGAATTTGCATCTCATCTGTTCAAAGGACGGGCATA  
TGTTCACTGCTGTATGCCAATCTTGATGTCCGCGACATAATGCGGCACGAAGGCCAGAAAGACAGTATAGAA  
TTATACCTTTCCAGGCTTGAGCGGGGCAACAAAGTTGTCCCAAATTTCCAAAAGGAAGCTTTTGACAGATACG  
CTGAAACGCCAGACGAAGTTGTCTGTACAGTACCTTCCAAACGTGTACGCACCAGCAGGTGGAAAACACAG  
GCAGGGTGTATGCTATTGCATTGCACAGTATATACGATATACCTGCTGATGAATTCGGAGCGGCACTTTTAAG  
AAAAAATGTCCATGTTTGTACGCCGCTTCCACTTTTCCGAGAATTTACTTCTCGAAGATTCACACGTCAACCT  
TGACGAAATCAACGCGTGTTTTTCGCGTGATGGAGACAAGCTGACTTTTTCTTTTCGCATCTGAGAGCACTTTAA  
ATTATTGTCATAGTTATTCTAATATTTTAAAAACGTGTGCAAACTTACTTCCCGGCATCTAATAGAGAGGTCT  
ACATGAAGGAGTTTTTGGTCACCAGGGTTAACACCTGGTTTTGTAAGTTTTCTAGGATAGATACTTTTTTATTAT  
ACAAGGGGGTAGCCCAACAAAGGTGTAAATAGTGAGCAATTTTACAGCGCAATGGAAGATGCATGGCACTACA  
AAAAGACTCTTGCAATGTGTAACAGCGAGAGGATTCTTCTGAAGATTCCTCATCGGTCAATTACTGGTCCCA  
AAAATGAGAGATATGGTCATAGTTCTCTATTGACATATCTCTCGACACCAGTAAAAGGACCCGCAAGAAG  
TCTTAGTGTCAAAGGATTTTGTATTACAGTTCTAAATCACATTCGCACTTATCAAGCCAAGGCACTTACATACT  
CCAATGTTTTATCCTTTGTGCAATCAATTCGTTCAAGGGTAATTATCAACGGAGTGACTGCCAGGTCTGAGTGG  
GATGTTGACAAATCTTTTTGCAATCCTTGTCATGACATTTTTCTTGCTACTAAGCTTGCCGTTTTAAAGAC  
GAATTGTTAATCAGCAAGTTTAGTTGGGGCCAAAATCAGTAAGCCAGCATGTATGGGATGAGATTTCCCTGG  
CTTTTGAAACGCATTTCCATCGATCAAGGAGAGACTGCTAAATCGGAACTAATTAAGTGTGCGGAGACGC

ATTAGAAATCAGGGTGCCTGATTTATATGTGACTTTTCACGATAGATTAGTGACTGAGTACAAAACATCGGTG  
GATATGCCAGTGCTTGATATCAGAAAGAGAATGGAGGAGACTGAGGTTATGTACAATGCATTGTCTGAGCTA  
TCTGTGCTCAAGGAGTCGGACAAGTTCGACGTTGATGTTTTTCCCGGATGTGCCAGACTTTGGAGGTAGACC  
CAATGACTGCAGCAAAGGTTATTGTGGCAGTGATGAGCAACGAGAGCGGACTGACTCTCACATTCGAACAGC  
CAACTGAAGCAAATGTCGCATTGGCACTTAAAGATTAGAAAAAGCCTCTGAGGGTGCCTAGTGTTACTTC  
TAGAGATGTTGAAGAACCATCCATGAAGGGTTCATGGCAAGAGGAGAGTTACAATTGGCCGGTCTGTCTGG  
AGACCAACCAGAGTCTTCCTATACTCGGAACGAGGAAATAGAGTCATTAGAGCAATTCCACATGGCAACGGCT  
AGTTCGTTAATTCGGAACAGATGAGTTCGATTGTGTACACGGGCCCCATTAAAGTTCAGCAAATGAAAACT  
TTATTGATAGCCTGGTAGCATCACTCTCTGCTGCGGTGTGCAACCTAGTCAAGATCCTAAAGGATACAGCTGCT  
ATAGATCTCGAAACCCGTCAGAAGTTTGGAGTCTTAGATGTTGCGACCAAAGATGGTTAATTAACCTTTAG  
CCAAGAATCACGCATGGGGCGTTATTGAAACACATGCTAGGAAGTACCAGTTGCACCTTTGGAGTATGATGA  
GCATGGAGTGGTAACTTGCGACAGTTGGAGAAGGGTGGCCGTGAGTTCTGAGTCAATGGTTTATTCTGATAT  
GGCAAAGCTCAGAACACTGAGGAGATTATTAAGAGATGGTGAGCCTCATGTCAGCAGTGCTAAAGTCGTCT  
AGTTGACGGTGTCCCGGGTGTGGAAAGACAAAAGAGATTCTCTCGAAAGTAAATTTGAGGAAGATCTAAT  
CTTAGTACCGGGTAAGCAGGCTGCTGAAATGATAAAGAGGCGTGCTAATGCGTCAGGAATAATTCAAGCCAC  
AAGAGATAATGTTCTGACTGTTGATTCAATTTATAATGAATTACGGTAAAGGAACACGCTGTCAGTTCAAAGG  
TTATTTATCGACGAAGGTCTGATGTTGCACACTGGTTGTGTGAATTTTCTGTTTCTATGTCTCTGTGCGAAAT  
GCATATGTTTATGGAGACACACAACAAATTCATACATCAACAGAGTATCCGGTTTTCCGTACCCTGCACATTT  
TGCAAAAATAGAGGTTGATGAGGTGGAACTCGCAGAACTACGCTGCGTTGTCCAGCCGACATTACCCACTAT  
CTTAACAGAAGGTACGAAGGACATGTCATGTGTACATCGTCGGTTAAAAAGTCAGTTTCTCAGGAATGGTGA  
GCGGGGCCGCAATGATCAATCCTGTATCTAAGCCATTGAATGGGAAGTTTTGACTTTCAGTCTGATAA  
AGAGGCGCTGCTTCTCGAGGATATACGGACGTCCATACAGTACATGAGGTACAAGGTGAGACATATGCAGA  
TGTGTGCTTGGTCAGATTGACTCCGACACCTGTATCTATTATCGCAGGAGATAGTCCGCACGTTCTCGTAGCTT  
TGTCAAGGCATACCCAAACATTGAAGTATTACACCGTAGTGATGGATCCTCTTGTAAGTATAATTAGGGATTTA  
GAAAACTTAGTTCTTACTTGTTAGATATGTATAAAGTAGATGCAGGGACCCAATAGCAATTACAGGTAGACT  
CCGTGTTTAAAGGTTCTAATCTTTTTGTTGCAGCACCAAGACTGGAGATATCTCAGATATGCAATTTTACTAT  
GATAAGTGTCTCCAGGTAATAGCACCATGTTAAATAACTATGATGCTGTTACCATGAGGTTGACTGACATTTT  
TCTTAATGTCAAAGATTGCATATTGGATTTCTCTAAGTCTGTGGCTGCACCGAAGGATCCGATCAAACCACTGA  
TTCCAATGGTACGAACGGCGGCAGAAATGCCACGCCAGACTGGACTATTGGAAAATTTGGTGGCGATGATCA  
AAAGAACTTTAATTCACCGGAGTTATCAGGAATAATCGACATTGAGAATACTGCATCTTTAGTAGTAGATAA  
ATTTTTGATAGTTACTTGCTTAAAGAAAAAGAAAACCAAATAAAAAATGTTTCTTTATTTGTAGAGAGTCTCT  
CAATAGATGGCTAGAGAAGCAGGAGCAAGTGACCATTGGTCAGCTTGCAGATTTTGATTTGTGGATCTTCCT  
GCCGTTGATCAGTACAGGCATATGATTAAAGCGCAACCTAAGCAGAAGCTGGATACATCAATTCAAAGCGAAT  
ATCCGGCCTTGCAGACGATTGTGTATCATTGAAAAAGATCAACGCAATCTTCGGTCTTTGTTCAAGTGAGCTC  
ACAAGGCAAATGCTCGAAAGCATAGACTCAAGTAAGTTTTGTTCTTTACAAGGAAGACGCCAGCTCAAATTG  
AGGATTTCTTCGGAGATCTCGATAGCCATGTCCCTATGGATATCTTGAGTTGGATATTTGCAAGTATGACAAA  
TCTCAGAACGAGTTCCACTGTGCAGTAGAGTATGAAATATGGAGAAGACTTGGATTAGAAGATTTTCTGGGA  
GAAGTTTGGAACAAGGCCACAGGAAAACACTCTTAAAGATTACACAGCTGGTATTAAACGTGTTTATGGT  
ACCAGAGAAAGAGTGGGGACGTTACAACATTCATCGGTAATACGGTGATTATTGCTGCTTGTGTTAGCTTCCAT  
GTTGCCCATGGAGAAAATAATCAAAGGTGCATTTTGCGGAGATGACAGTTTACTATACTTCCAAAAGGTTGT  
GAGTTTCTGACATACAGCATAACGCCAACCCTATGTGGAATTTGAGGCTAAGCTATTCAGAAAGCAGTATG  
GTTATTTCTGTGGAAGGTACGTGATACATCATGACAGAGGGTGTATTGTTTATTATGACCTTTGAAGTTGATT  
TCTAAACTTGGTGCTAAACACATCAAGGATTGGGATCACTTAGAAGAGTTCAGAAGATCCCTTTGTGATGTTG  
CAAATTCGTTGAACAACTGTGCGTATTACACGCAGTTGGACGACGCTGTGAGTGAGGTCCATAAAACCGCAC  
CCCGGGTTCGTTGTATATAAAAGTTAGTTAAATATCTGTCCGATAAGGTTCTTTTAGAAGTTTGTATAGA  
TGGCTCTTGTTAAGGGTAAAGTCAATATTAATGAGTTCATAGACTTGTCAAATCAGAAAAATTTCTCCGTCT  
ATGTTACACCTGTTAAGAGTGTGATGATCTCAAGGTTGATAAGATATTGGTTCATGAAGATGAATCTTTGTC  
CGAAGTCAATTTACTCAAAGGTGTAACCTCATTGATGGTGGCTATGTACATCTTGCTGGTCTTGTTGGTGACA

GGTGAATGGAATTTGCCAGATAATTGTCGTGGTGGTGTCAAGTGTCTGTTTGGTCGATAAGAGAATGGAGAGA  
GCGGACGAGGCAACTCTTGCTTCATACTATACCGCAGCGGCTAAGAAAAGGTTTCAGTTCAAAGTCGTTCCAA  
ATTACAACATCACTACCAAGGACGCAGAAAAGGCAGTTTGGCAAGTACTAGTTAATATTAGAAATGTTAAAAAT  
TGCTGCGGGTTACTGTCCGCTGTCATTAGAATTTGTGTCAAGTGTGTATTGTTTATAAAAAATATTATAAACTCG  
GTTTGAGAGAGAAAAATTACGAGCGTCACGGATGGAGGGCCCATGGAATATCAGAAGAAGTTGTTGATGAG  
TTCATGGAAGAAGTCCCGATGTCTGTAAGGCTTGCAAAATTTGTTTGAAGACCGGAAAAAAGTTTAGTAGTA  
AAAGTGAGAATAATAGTGGTAATAATAGGCCGAAACCAACAAAAACCAAGGAAGGAAAAGGGTTTAAAA  
GTTAGGGTTGAGAAGGATAATTTAATTGATAATGAATTGGAGACTTACGTCGCCGATTAGATTTCGATTAAA  
TATGTCTTACACAATCGCAACTCCATCGCAATTTGTGTTTTTGTATCAGCATGGGCCGACCCTATAGAATTAAT  
AAATTTATGTACTAATTCAGTGGTAATCAGTTCCAAACACAACAAGCTAGAACAACCGTTCAACGGCAATTTA  
GCGAAGTGTGGAACCTGTCCCTCAAGTCACTGTTAGGTTTCTGACAGTGGTTTTAAGGTGTATAGGTACAA  
TGCGGTACTAGATCCTCTAGTTACTGCTTTGTTAGGAGCTTTGATACTAGAAATAGGATTATAGAAGTCGAAA  
ATCAGGCGAACCCGACAACCGCCGAAACGTTAGACGCTACTCGTAGAGTAGATGACGCAACGGTGGCTATAA  
GGAGCGCTATAAATAATTTAGTAGTAGAATTGGTCAAAGGAACAGGTTTGTACAATCAGAGCACATTTGAAA  
GTGCATCCGTTTACAATGGTCCTCTGCACCTGCATCTTGA

MN882011

ATGGCATACACACAGACAGCTACCACATCCGCTTTGCTCGACACTGTCCGAGGTAACAATACCTTGGTCAACG  
ATCTTGCGAAGCGGCGTCTTTATGACACAGCGGTGCGAGGTTCAACGCTCGTGATCGCAGGCCCAAAGTAA  
ATTTTTCCAAAGTAATAAGTGAGGAACAGACGCTTATTGCTACTAGGGCATATCCAGAATTCCAGATAACCTTC  
TATAATACGCAGAACGCCGTGCATTGCTTGCCGGTGGACTACGATCCTTAGAACTGGAATATCTAATGATGC  
AGATCCCGTACGGATCACTCACATATGATATAGGTGGGAATTTTGCATCTCATCTGTTCAAAGGACGGGCATA  
TGTTCACTGCTGTATGCCAATCTTGATGTCCGCGACATAATGCGGCACGAAGGCCAGAAAGACAGTATAGAA  
TTATACCTTTCCAGGCTTGAGCGGGGCAACAAAGTTGTCCCAAATTTCCAAAAGGAAGCTTTTGACAGATACG  
CTGAAACGCCAGACGAAGTTGTCTGTACAGTACCTTCCAAACGTGTACGCACCAGCAGGTGGAAAACACAG  
GCAGGGTGTATGCTATTGCACTGCACAGTATATACGATATACCTGCTGATGAATTCGGAGCGGCACTTTTAAG  
GAAAAATGTCCATGTTTGTTACGCCGCCTTCCACTTTTCCGAGAATTTACTTCTCGAAGATTCACACGTCAACCT  
TGACGAAATCAATGCGTGTTTTTCGCGTGATGGAGACAAGCTGACTTTTTCTTTCGCATCTGAGAGCACTTTAA  
ATTATTGTCATAGTTATTCTAATATTTTAAAATACGTGTGCAAACTTACTTCCCGGCATCTAATAGAGAGGTCT  
ACATGAAGGAGTTTTTGGTCACCAGGGTTAACACCTGGTTTTGTAAGTTTTCTAGGATAGATACTTTTTTATTAT  
ACAAGGGGGTAGCCCAACAAAGGTGTAAATAGTGAGCAATTTTACAGCGCAATGGAAGATGCATGGCACTACA  
AAAAGACTCTTGCAATGTGTAAACAGCGAGAGGATTCTTCTGAAGATTCCTCATCGGTCAATTACTGGTTCCCA  
AAAATGAGAGATATGGTCATAGTTCTCTATTGACATATCTCTCGACACCAGTAAAAGGACCCGCAAGAAG  
TCTTAGTGTCAAAGGATTTTGTATTACAGTTTTAAATCACATTGCACTTATCAAGCCAAGGCACTTACATACT  
CCAATGTTTTATCCTTTGTGCAATCAATTCGTTCAAGGGTAATTATCAACGGAGTGACTGCCAGGTCTGAGTGG  
GATGTTGACAAATCTTTTTGCAATCCTTGTCATGACATTTTTCTTGCACTAAGCTTGCCGTTTTAAAAGAC  
GAATTGTTAATCAGCAAGTTTAGTTTGGGGCCAAAATCAGTAAGCCAGCACGTATGGGATGAGATTTCCCTGG  
CTTTTGAAACGCATTTCCATCGATCAAGGAGAGACTGCTAAATCGGAACTAATTAAGTGTCGGGAGACGC  
ATTAGAAATCAGGGTGCCTGATTTATATGTGACTTTTACGATAGATTAGTGACTGAGTACAAAACATCGGTG  
GATATGCCAGTGCTTGATATCAGAAAGAGAATGGAGGAGACTGAGGTTATGTACAATGCATTGTCTGAGCTA  
TCTGTGCTCAAGGAGTCGGACAAGTTGACGTTGATGTTTTTCCCGGATGTGCCAGACTTTGGAGGTAGACC  
CAATGACTGCAGCAAAGGTTATTGTGGCAGTGATGAGCAACGAGAGCGGACTGACTCTTACATTGAAACAGC  
CAACTGAAGCAAATGTGCAATTGGCACTTAAAGATTGAGAAAAAGCCTCTGAGGGTGAAGTGGTTACTTC  
TAGAGATGTTGAAGAACCATCCATGAAGGGTTCAATGGCAAGAGGAGAGTTACAATTGGCCGGTCTGTCTGG  
CGACCAACCAGAGTCTTCTATACTCGGAACGAGGAAATAGAGTCATTAGAGCAATTCACATGGCAACGGCT  
AGTTCGTTAATTCGGAAACAGATGAGTTCGATTGTGTACACGGGCCCCATTAAAGTTCAGCAATGAAAACT



TTATTGATAGCCTGGTAGCATCACTCTCTGCTGCGGTGTGCGAACCTAGTCAAGATCCTAAAGGATACAGCTGCT  
ATAGATCTCGAAACCCGTCAGAAGTTTGGAGTCTTAGATGTTGCGACCAAAGATGGTTAATTAACCTTTAG  
CCAAGAATCACGCATGGGGCGTTATTGAAACACATGCTAGGAAGTACCACGTTGCACTTTTGGAGTATGATGA  
GCATGGAGTGGTAACTTGCGACAGTTGGAGAAGGGTGGCCGTGAGTCTGAGTCAATGGTTTATTCTGATAT  
GGCAAAGCTCAGAACACTGAGGAGATTATTAAGAGATGGTGAGCCTCATGTCAGCAGTGCTAAAGTCGTCT  
AGTTGACGGTGTCCCGGTTGTGGAAAGACAAAGAGATTCTCTCGAAAGTAAATTTTGGAGGAAGATCTAAT  
CTTAGTACCGGGTAAGCAGGCTGCTGAAATGATAAAGAGGGCTGCTAATGCGTCAGGAATAATTCAAGCCAC  
AAGAGATAATGTTTCGTAAGTTCATTATAATGAATTACGGTAAAGGAACACGCTGTCAGTTCAAAGG  
TTATTTATCGACGAAGGTCTGATGTTGCACACTGGTTGTGTGAATTTCTTGTCTATGTCTCTGTGCGAAATT  
GCATATGTTTATGGAGACACACAACAAATTCCATACATCAACAGAGTATCCGTTTTCCGTACCCTGCACATTT  
TGCAAAAATAGAGTTGATGAGGTGGAACTCGCAGAACTACGCTGCGTTGTCCAGCCGACATTACCCACTAT  
CTTAACAGAAGGTACGAAGGACATGTCATGTGTACATCGTTCGTTAAAAAGTCAGTTTCTCAGGAAATGGTGA  
GCGGGGCCGCAATGATCAATCCTGTATCTAAGCCATTGAATGGGAAAGTTTGACTTTCACTCAGTCTGATAA  
AGAGGCGCTGCTTCTCGAGGATATACGGACGTCCATACAGTACATGAGGTACAAGGTGAGACATATGCAGA  
TGTGTCGTTGGTCAGATTGACTCCGACACCTGTATCTATCATCGCAGGAGATAGTCCGCACGTTCTCGTAGCTT  
TGTCAGGCATACCCAAACATTGAAGTATTACCCGTAGTGATGGATCCTCTTGAAGTATAATTAGGGATTTA  
GAAAACTTAGTTCTTACTTGTAGATATGTATAAAGTAGATGCAGGGACCCAATAGCAATTACAGGTAGACT  
CCGTGTTTAAAGTTCTAATCTTTTTGTTGCAGCACCAAGACTGGAGATATCTCAGATATGCAATTTTACTAT  
GATAAGTGTCTCCAGGTAATAGCACCATGTTAAATAACTATGATGCTGTTACCATGAGGTTGACTGACATTT  
TCTTAATGTCAAAGATTGCATATTGGATTTCTCTAAGTCTGTGGCTGCACCGAAGGATCCGATCAAACCACTGA  
TTCCAATGGTACGAACGGCGGCAGAAAAGCCACGCCAGACTGGACTATTGGAAAATTTGGTGGCGATGATCA  
AAAGAACTTTAATTCACCGGAGTTATCAGGAATAATCGACATTGAGAATACTGCATCTTTAGTAGTAGATAA  
ATTTTTGATAGTTACTTGCTTAAAGAAAAAGAAAACCAATAAAAAATGTTTCTTTATTTGTAGAGAGTCTCT  
CAATAGATGGTTAGAGAAGCAGGAGCAAGTGACCATTGGTCAGCTTGCAGATTTTGATTTTGTGGATCTTCT  
GCCGTTGATCAGTACAGGCATATGATTAAGCGCAACCTAAGCAGAAGCTGGATACATCAATTCAAAGCGAAT  
ATCCGGCCTTGACAGCAGATTGTGTATCATTCGAAAAAGATCAACGCAATCTTCGGTCCTTTGTTCAAGTGTG  
ACAAGGCAAATGCTCGAAAGCATAGACTCAAGTAAGTTTTTGTCTTTACAAGGAAGGCGCCAGCTCAAATTG  
AGGATTTCTTCGGAGATCTCGATAGCCATGTCCCTATGGATATCTTGGAGTTGGATATTTTGAAGTATGACAAA  
TCTCAGAACGAGTTCCACTGTGCAGTAGAGTATGAAATATGGAGAAGACTTGGATTAGAAGATTTTCTGGGA  
GAAGTTTGAAACAAGGCCACAGAAAACTACTCTTAAAGATTATACAGCTGGTATTAACGTTTATGGT  
ACCAGAGAAAGAGTGGGGACGTTACAACATTCATCGGTAATACGGTGATTATTGCTGCTTGTGTTAGCATCCAT  
GTTACCCATGGAGAAAATAATCAAAGGTGCATTTTTCGGAGATGACAGTTTACTATACTTCCAAAAGGTTGT  
GAGTTTCTGACATACAGCATACAGCCAACCTTATGTGGAATTTTCGAGGCTAAGCTATTCAGAAAAGCAGTATG  
GTTATTTCTGTGGAAGGTACGTGATACATCACGACAGAGGGTGTATTGTTTATTATGACCTTTGAAGTTGATT  
TCTAACTTGGTGCTAAACACATCAAGGATTGGGATCACTTAGAAGAGTTCAGAAGATCCCTTTGTGATGTTG  
CAAATTCGTTGAACAACCTGTGCGTATTACACGCAGTTGGACGACGCTGTGAGTGAGGTCCATAAAACCGCACCC  
CCCGGTTTCGTTGTATATAAAAGTTTAGTTAAATATCTGTCCGATAAGGTTCTTTTGAAGTTTGTGTTATAGA  
TGGCTCTTGTTAAGGGTAAAGTCAATATTAATGAGTTCATAGACTTGTCAAAATCAGAAAAATTTCTCCGTCT  
ATGTTACACCTGTTAAGAGTGTGATGATCTCCAAGGTTGATAAGATATTGGTTCATGAAGATGAATCTTTGTC  
CGAAGTCAATTTACTCAAAGGTGTAACCTCATTGATGGTGGCTATGTACATCTTGCTGGTCTTGTTGGTGACA  
GGTGAATGGAATTTGCCAGATAATTGTCGTGGTGGTGTGAGTGTCTGTTTGGTCGATAAGAGAATGGAGAGA  
GCGGACGAGGCAACTCTTGCTTCATACTATACCGCAGCGGCTAAGAAAAGGTTTCAGTTCAAAGTCGTTCCAA  
ATTACAACATCACTACCAAGGACGCAAGAAAGGAGTTTGGCAAGTACTAGTTAATATTAGAAATGTTAAAT  
TGCTGCGGGTTACTGTCCGCTGTCATTAGAATTTGTGTGAGTGTGATTGTTTATAAAAAATATTATAAACTCG  
GTTTGAGAGAGAAAATTACGAGCGTCACGGATGGAGGGCCTATGGAATATCAGAAGAAGTTGTTGATGAGT  
TCATGGAAGAAGTCCCGATGTCTGTAAGGCTTGCAAAATTTGTTTCGAAGACCGGAAAAAAGTTTAGTAGTAA  
AAGTGAGAATAATAGTGGAATAATAGGCCGAAACCAACAAAAACCAAGGAAGGAAAAAGGGTTTAAAG  
TAGGGTTGAGAAGGATAATTAATTGATAATGAATTGGAGACTTACGTCGCCGATTGAGATTCGTATTAAT

ATGTCTTACACAATCGCAACTCCATCGCAATTTGTGTTTTGTGCATCAGCATGGGCCGACCCTATAGAATTAATA  
AATTTATGTACTAATTCAGTGTCCAAACACAACAAGCTAGAACAACCGTTCAACGGCAATTTAG  
CGAAGTGTGGAAACCTGTCCCTCAAGTCACTGTTAGGTTTCCTGACAGTGGTTTTAAGGTGTATAGGTACAAT  
GCGGTACTAGATCCTCTAGTTACTGCTTTGTTAGGAGCTTTCGATACTAGAAATAGGATTATAGAAGTCGAAA  
ATCAGGCGAACCCGACAACCGCCGAAACGTTAGACGCTACTCGTAGAGTAGATGACGCAACGGTGGCTATAA  
GGAGCGCTATAAATAATTTAGTAGTAGAATTGGTCAAAGGAACAGGTTTGTACAATCAGAGCACATTTGAAA  
GTGCATCCGGTTTACAATGGTCCTCTGCACCTGCATCTTGA

MN882013

ATGGCATAACACAGACAGCTACCACATCCGCTTTGCTCGACACTGTCCGAGGTAACAATACCTTGGTCAACG  
ATCTTGCGAAGCGGCGTCTTTATGACACAGCGGTGCGAGGTTCAACGCTCGTGATCGCAGGCCCAAAGTAA  
ATTTTTCCAAAGTAATAAGTGAGGAACAGACGCTTATTGCTACTAGGGCATATCCTGAATTCCAGATAACCTTC  
TATAATACGCAGAACGCCGTGCATTGCTTCCGGTGGACTACGATCCTTAGAACTGGAATATCTAATGATGC  
AGATCCCGTACGGATCACTCACATATGATATAGGTGGGAATTTGCATCTCATCTGTTCAAAGGACGGGCATA  
TGTTCACTGCTGTATGCCAATCTTGATGTCCGCGACATAATGCGGCACGAAGGCCAGAAAGACAGTATAGAA  
TTATACCTTTCCAGGCTTGAGCGGGGCAACAAAGTTGTCCCAAATTTCCAAAGGAAGCTTTTGACAGATACG  
CTGAAACGCCAGACGAAGTTGTCTGTACAGTACCTTCCAAACGTGTACGCACCAGCAGGTGGAAAACACAG  
GCAGGGTGTATGCTATTGCATTGCACAGTATATACGATATACCTGCTGATGAATTCGGAGCGGCACTTTTAAG  
GAAAAATGTCCATGTTTGTACGCCGCCTTCCACTTTTCCGAGAATTTACTTCTCGAAGATTCACACGTCAACCT  
TGACGAAATCAACGCGTGTTCGCGTGATGGAGACAAGCTGACTTTTCTTTCGCATCTGAGAGCACTTTAA  
ATTATTGTCATAGTTATTCTAATATTTAAAATACGTGTGCAAACTTACTTCCCGGCATCTAATAGAGAGGTCT  
ACATGAAGGAGTTTTTGGTCACCAGGGTTAACACCTGGTTTTGTAAGTTTTCTAGGATAGATACTTTTTTATTAT  
ACAAGGGGGTAGCCCAAAAGGTGTAAATAGTGAGCAATTTTACAGCGCAATGGAAGATGCATGGCACTACA  
AAAAGACTCTTGCAATGTGTAAACAGCGAGAGGATTCTTCTGAAGATTCTCATCGGTCAATTACTGGTCCCA  
AAAATGAGAGATATGGTCATAGTTCTCTATTGACATATCTCTCGACACTAGTAAAAGGACCCGCAAAGAAG  
TCTTAGTGCAAAGGATTTGTATTACAGTTTTAAATCACATTCGCACTTATCAAGCCAAGGCACTTACATACT  
CCAATGTTTTATCCTTTGTGAATCAATTCGTTCAAGGGTAATTATCAACGGAGTGACTGCCAGGTCTGAGTGG  
GATGTTGACAAATCTTTTGCAATCCTTGTCATGACATTTTCTTGCACTAAGCTTGCCGTTTTAAAGAC  
GAATTGTTAATCAGCAAGTTTAGTTTGGGGCCAAAATCAGTAAGCCAGCATGTATGGGATGAGATTTCCCTGG  
CTTTTGAAACGCATTTCCATCGATCAAGGAGAGACTGCTAAATCGGAACTAATTAAGTGTGCGGAGACGC  
ATTAGAAATCAGGGTGCCTGATTTATATGTGACTTTTACGATAGATTAGTGACTGAGTACAAAACATCGGTG  
GATATGCCAGTGCTTGATATCAGAAAGAGAATGGAGGAGACTGAGGTTATGTACAATGCATTGTCTGAGCTA  
TCTGTGCTCAAGGAGTCGGACAAGTTGACGTTGATGTTTTTCCCGGATGTGCCAGACTTTGGAGGTAGACC  
CAATGACTGCAGCAAAGGTTATTGTGGCAGTGATGAGCAACGAGAGCGGACTGACTCTTACATTGCAACAGC  
CAACTGAAGCAAATGTCGATTGGCACTTAAAGATTGAGAAAAAGCCTCTGAGGGTGCAGTAGTGGTTACTTC  
TAGAGATGTTGAAGAACCATCCATGAAGGGTTCAATGGCAAGAGGAGATTACAATTGGCCGGTCTGTCTGG  
AGACCAACCAGAGTCTTCCTATACTCGGAACGAGGAAATAGAGTCATTAGAGCAATTCACATGGCAACGGCT  
GGTTCGTTAATTCGGAAACAGATGAGTTGATTGTGTACACGGGCCCATTAAGTTGAGCAAATGAAAACT  
TTATTGATAGCCTGGTAGCATCACTCTCTGCTGCGGTGTGCAACCTAGTCAAGATCCTAAAGGATACAGCTGCT  
ATAGATCTCGAAACCCGTCAGAAGTTTGGAGTCTTAGATGTTGCGACCAAAGATGGTTAATTAACCTTTAG  
CCAAGAATCACGCATGGGGCGTTATTGAAACACATGCTAGGAAGTACCACGTTGCACTTTTGGAGTATGATGA  
GCATGGAGTGGTAACTTGCGACAGTTGGAGAAGGGTGGCCGTGAGTTCTGAGTCAATGGTTTATTCTGATAT  
GGCAAAGCTCAGAACTGAGGAGATTATTAAGAGATGGTGAGCCTCATGTCAGCAGTGCTAAAGTCGTCT  
AGTTGACGGTGTCCCGGTTGTGGAAAGACAAAAGAGATTCTCTCGAAAGTAAATTTGAGGAAGATCTAAT  
CTTAGTACCGGTAAAGCAGGCTGCTGAAATGATAAAGAGGCGTGCTAATGCGTCAGGAATAATTCAAGCCAC  
AAGAGATAATGTTCTGACTGTTGATTCAATTTATAATGAATTACGGTAAAGGAACACGCTGTCAGTTCAAAGG

TTATTTATCGACGAAGGTCTGATGTTGCACACTGGTTGTGTGAATTTTCTTGTTTCTATGTCTCTGTGCGAAATT  
GCATATGTTTATGGAGACACACAACAAATTCCATACATCAACAGAGTATCCGGTTTTCCGTACCCTGCACATTT  
TGCAAAAATAGAGGTTGATGAGGTGGAACTCGCAGAACTACGCTGCGTTGTCCAGCCGACATTACCCACTAT  
CTTAACAGAAGGTACGAAGGACATGTCATGTGTACATCGTCGGTTAAAAAGTCAGTTTCTCAGGAAATGGTGA  
GCGGGGCCGAATGATCAATCCTGTATCTAAGCCATTGAATGGGAAAGTTTTGACTTTCACTCAGTCTGATAA  
AGAGGCGCTGCTTTCTCGAGGATATACGGACGTCCATACAGTACATGAGGTACAAGGTGAGACATATGCAGA  
TGTGTCGTTGGTCAGATTGACTCCGACACCTGTATCTATCATCGCAGGAGATAGTCCGCACGTTCTCGTAGCTT  
TGTCAAGGCATACCCAAACATTGAAGTATTACCCGTAGTGATGGATCCTCTTGTAAGTATAAATTAGGGATTTA  
GAAAACTTAGTTCTTACTTGTTAGATATGTATAAAGTAGATGCAGGGACCCAATAGCAATTACAGGTAGACT  
CCGTGTTTAAAGGTTCTAACCTTTTTGTTGCAGCACCAAGACTGGAGATATCTCAGATATGCAATTTTACTAT  
GATAAGTGTCTCCAGGTAATAGCACCATGTTAAATACTATGATGCTGTTACCATGAGGTTGACTGACATTTT  
TCTTAATGTCAAAGATTGCATATTGGATTTCTCTAAGTCTGTGGCTGCACCGAAGGATCCGATCAAACCACTGA  
TTCCAATGGTACGAACGGCGGCAGAAATGCCACGCCAGACTGGACTATTGGAAAATTTGGTGGCGATGATCA  
AAAGAACTTTAATTCACCGGAGTTATCAGGAATAATCGACATTGAGAATACTGCATCTTTAGTAGTAGATAA  
ATTTTTGATAGTTACTTGCTTAAAGAAAAAGAAAAACCAAATAAAAAATGTTTCTTTATTTGTAGAGAGTCTCT  
CAATAGATGGTTAGAGAAGCAGGAGCAAGTGACCATTGGTCAGCTTGCAGATTTTGATTTTGTGGATCTTCT  
GCCGTTGATCAGTACAGGCATATGATTAAAGCGCAACCTAAGCAGAAGCTGGATACATCAATTCAAAGCGAAT  
ATCCGGCCTTGACAGACGATTGTGTATCATTGAAAAAGATCAACGCAATCTTCGGTCCTTTGTTCAGTGAGCTC  
ACAAGGCAAATGCTCGAAAGCATAGACTCAAGTAAGTTTTGTTCTTTACAAGGAAGACGCCAGCTCAAATTG  
AGGATTTCTTCGGAGATCTCGATAGCCATGTCCCTATGGATATCTTGGAGTTGGATATTTGGAAGTATGACAAA  
TCTCAGAACGAGTTCCACTGTGCAGTAGAGTATGAAATATGGAGAAGACTTGGATTAGAAGATTTTCTGGGA  
GAAGTTTGAAACAAGGCCACAGGAAAACTACTCTTAAAGATTACACAGCTGGTATTAACCGTGTTTATGGT  
ACCAGAGAAAAGAGTGGGGACGTTACAACATTATCGGTAATACGGTGATTATTGCTGCTTGTTAGCTTCCAT  
GTTGCCCATGGAGAAAATAATCAAAGGTGCATTTTGCGGAGATGACAGTTTACTATACTTCCAAAAGGTTGT  
GAGTTTCTGACATACAGCATAACAGCAACCTTATGTGGAATTTGAGGCTAAGCTATTCAGAAAGCAGTATG  
GTTATTTCTGTGGAAGGTACGTGATACATCATGACAGAGGGTGTATTGTTTATTATGACCTTTGAAGTTGATT  
TCTAACTTGGTGCTAAACACATCAAGGATTGGGATCACTTAGAAGAGTTCAGAAGATCCCTTTGTGATGTTG  
CAAATTCGTTGAACAACTGTGCGTATTACACGCAGTTGGACGACGCTGTGAGTGAGGTCCATAAAACCGCACC  
CCCGGGTTCGTTTGATATAAAAGTTTAGTTAAATATCTGTCGATAAGGTTCTTTTTAGAAGTTTGTATAGA  
TGGCTCTTGTTAAGGGTAAAGTCAATATTAATGAGTTCATAGACTTGTCAAATCAGAAAAATTTCTCCGTCT  
ATGTTACACCTGTTAAGAGTGTGATCTCCAAGGTTGATAAGATATTGGTTCATGAAGATGAATCTTTGTC  
CGAAGTCAATTTACTCAAAGGTGTAAACTCATTGATGGTGGCTATGTACATCTTGCTGGTCTTGTTGGTGACA  
GGTGAATGGAATTTGCCAGATAATTGTCGTGGTGGTGTGAGTGTCTGTTTGGTCGATAAAGAATGGAGAGA  
GCGGACGAGGCAACTCTTGCTTCATACTATACCGCAGCGGCTAAGAAAAGGTTTCAGTTCAAAGTCGTTCCAA  
ATTACAACATCACTACCAAGGACGCAGAAAAGGCAGTTTGCAAGTACTAGTTAATATTAGAAATGTTAAAA  
TGCTGCGGGTACTGTCCGCTGTCATTAGAATTTGTGTGAGTGTGATTGTTTATAAAAAATATTATAAACTCG  
GTTTGAGAGAGAAAATTACGAGCGTCACGGATGGAGGGCCCATGGAATATCAGAAGAAGTTGTTGATGAG  
TTCATGGAAGAAGTCCCGATGTCTGTAAGGCTTGCAAAATTTGTTTGAAGACCGGGAAAAAGTTTAGTAGTA  
AAAGTGAGAATAATAGTGGAATAATAGGCCGAAACCAACAAAAACCAAAGGAAGGAAAAGGGTTTAAAA  
GTTAGGGTTGAGAAGGATAATTTAATTGATAATGAATTGGAGACTTACGTCGCCGATTGAGATTCGATTAAA  
TATGTCTTACACAATCGCAACTCCATCGCAATTTGTGTTTTGTGTCAGCATGGGCCGACCCTATAGAATTAAT  
AAATTTATGTACTAATTCAGTAAATCAATTCAAACACAACAAGCTAGAACAACCGTTCAACGGCAATTTA  
GCGAAGTGTGGAACCTGTCCCTCAAGTCACTGTTAGGTTTCTGACAGTGGTTTTAAGGTGTATAGGTACAA  
TGCGGTACTAGATCCTCTAGTTACTGCTTTGTTAGGAGCTTTCGATACTAGAAATAGGATTATAGAAGTCGAAA  
ATCAGGCGAACCCGACAACCGCCGAAACGTTAGACGCTACTCGTAGAGTAGATGACGCAACGGTGGCTATAA  
GGAGCGCTATAAATAATTTAGTAGTAGAATTGGTCAAAGGAACAGGTTTGTACAATCAGAGCACATTTGAAA  
GTGCATCCGGTTTACAATGGTCCTCTGCACCTGCATCTTGA

MN882016

ATGGCATACACACAGACAGCTACCACATCCGCTTTGCTCGACACTGTCCGAGGTAACAATACCTTGGTCAACG  
ATCTTGCGAAGCGGCGTCTTTATGACACAGCGGTGACGAGTTCAACGCTCGTGATCGCAGGCCCAAAGTAA  
ATTTTTCCAAAGTAATAAGTGAGGAACAGACGCTTATTGCTACTAGGGCATATCCTGAATTCCAGATAACCTTC  
TATAATACGCAGAACGCCGTGCATTGCTTGCCGGTGGACTACGATCCTTAGAACTGGAATATCTAATGATGC  
AGATCCCGTACGGATCACTCACATATGATATAGGTGGGAATTTTGCATCTCATCTGTTCAAAGGACGGGCATA  
TGTTCACTGCTGTATGCCCAATCTTGATGTCCGCGACATAATGCGGCACGAAGGCCAGAAAGACAGTATAGAA  
TTATACCTTTCCAGGCTTGAGCGGGGCAACAAAGTTGTCCCAAATTTCCAAAAGGAAGCTTTTGACAGATACG  
CTGAAACGCCAGACGAAGTTGTCTGTACAGTACCTTCCAAACGTGTACGCACCAGCAGGTGAAAAACACAG  
GCAGGGTGTATGCTATTGCATTGCACAGTATATACGATATACCTGCTGATGAATTCGGAGCGGCACTTTTAAG  
GAAAAATGTCCATGTTTGTACGCCGCTTCCACTTTTCCGAGAATTTACTTCTCGAAGATTCACACGTCAACCT  
TGACGAAATCAACGCGTGTTTTTCGCGTGATGGAGACAAGCTGACTTTTTCTTTCGCATCTGAGAGCACTTTAA  
ATTATTGTCATAGTTATTCTAATATTTAAAATACGTGTGCAAACTTACTTCCCGGCATCTAATAGAGAGGTCT  
ACATGAAGGAGTTTTTGGTCACCAGGGTTAACACCTGGTTTTGTAAGTTTTCTAGGATAGATACTTTTTTATTAT  
ACAAGGGGGTAGCCCAAAAGGTGTAAATAGTGAGCAATTTTACAGCGCAATGGAAGATGCATGGCACTACA  
AAAAGACTCTTGCAATGTGTAACAGCGAGAGGATTCTTCTGAAGATTCCTCATCGGTCAATTACTGGTCCCA  
AAAATGAGAGATATGGTCATAGTTCTCTATTGACATATCTCTCGACACTAGTAAAAGGACCCGCAAAGAAG  
TCTTAGTGCAAAGGATTTTGTATTACAGTTTTAAATCACATTCGCACTTATCAAGCCAAGGCACTTACATACT  
CCAATGTTTTATCCTTTGTGAATCAATTGTTCAAGGGTAATTATCAACGGAGTGACTGCCAGGTCTGAGTGG  
GATGTTGACAAATCTTTTTGCAATCCTTGTCATGACATTTTTCTTGCATACTAAGCTTGCCGTTTTAAAGAC  
GAATTGTTAATCAGCAAGTTTAGTTTGGGGCCAAAATCAGTAAGCCAGCATGTATGGGATGAGATTTCCCTGG  
CTTTTGAAACGCATTTCCATCGATCAAGGAGAGACTGCTAAATCGGAACTAATTAAGTGTCGGGAGACGC  
ATTAGAAATCAGGGTGCCTGATTTATATGTGACTTTTACGATAGATTAGTGACTGAGTACAAAACATCGGTG  
GATATGCCAGTGCTTGATATCAGAAAGAGAATGGAGGAGACTGAGGTTATGTACAATGCATTGTCTGAGCTA  
TCTGTGCTCAAGGAGTCGGACAAGTTGACGTTGATGTTTTTCCCGGATGTGCCAGACTTTGGAGGTAGACC  
CAATGACTGCAGCAAAGGTTATTGTGGCAGTGATGAGCAACGAGAGCGGACTGACTCTTACATTGCAACAGC  
CAACTGAAGCAAATGTCGATTGGCACTTAAAGATTGAGAAAAAGCCTCTGAGGGTGCCTAGTGTTACTTC  
TAGAGATGTTGAAGAACCATCCATGAAGGGTTCAATGGCAAGAGGAGATTACAATTGGCCGGTCTGTCTGG  
AGACCAACCAGAGTCTTCTATACTCGGAACGAGGAAATAGAGTCATTAGAGCAATTCCACATGGCAACGGCT  
GGTTCGTTAATTCGGAAACAGATGAGTTCGATTGTGTACACGGGCCCATTAAGTTGAGCAAATGAAAACT  
TTATTGATAGCCTGGTAGCATCACTCTCTGCTGCGGTGTGCAACCTAGTCAAGATCCTAAAGGATACAGCTGCT  
ATAGATCTCGAAACCCGTCAGAAGTTTGGAGTCTTAGATGTTGCGACCAAAGATGGTTAATTAACCTTTAG  
CCAAGAATCACGCATGGGGCGTCATTGAAACACATGCTAGGAAGTACCAGTTGCACTTTTGGAGTATGATGA  
GCATGGAGTGGTAACTTGCGACAGTTGGAGAAGGGTGGCCGTGAGTTCTGAGTCAATGGTTTATTCTGATAT  
GGCAAAGCTCAGAACTGAGGAGATTATTAAGAGATGGTGAGCCTCATGTCAGCAGTGCTAAAGTCGTCTT  
AGTTGACGGTGTCCCGGGTTGTGGAAAGACAAAAGAGATTCTCTCGAAAGTAAATTTTGAGGAAGATCTAAT  
CTTAGTACCGGGTAAGCAGGCTGCTGAAATGATAAAGAGGCGTGCTAATGCGTCAGGAATAATTCAAGCCAC  
AAGAGATAATGTTCTGACTGTTGATTCAATTTATAATGAATTACGGTAAAGGAACACGCTGTCAGTTCAAAGG  
TTATTTATCGACGAAGGTCTGATGTTGCACACTGGTTGTGTGAATTTTCTGTTTCTATGTCTCTGTGCGAAAT  
GCATATGTTTATGGAGACACACAACAAATTCCATACATCAACAGAGTATCCGGTTTTCCGTACCCTGCACATTT  
TGCAAAAATAGAGGTTGATGAGGTGGAACTCGCAGAACTACGCTGCGTTGTCCAGCCGACATTACCACTAT  
CTTAACAGAAGGTACGAAGGACATGTCATGTGTACATCGTCGGTTAAAAAGTCAGTTTCTCAGGAAATGGTGA  
GCGGGGCCGCAATGATCAATCCTGTATCTAAGCCATTGAATGGGAAAGTTTGACTTTCACTCAGTCTGATAA  
AGAGGCGCTGCTTCTCGAGGATATACGGACGTCCATACAGTACATGAGGTACAAGGTGAGACATATGCAGA  
TGTGTGCTTGGTCAGATTGACTCCGACACCTGTATCTATCATCGCAGGAGATAGTCCGCACGTTCTCGTAGCTT  
TGTCAAGGCATACCCAAACATTGAAGTATTACACCGTAGTGATGGATCCTCTTGTAAGTATAATTAGGGATTTA

GAAAACTTAGTTCCTTACTTGTTAGATATGTATAAAGTAGATGCAGGGACCCAATAGCAATTACAGGTAGACT  
CCGTGTTTAAAGGTTCTAATCTTTTTGTTGCAGCACCAAGACTGGAGATATCTCAGATATGCAATTTTACTAT  
GATAAGTGTCTCCAGGTAATAGCACCATGTTAAATACTATGATGCTGTTACCATGAGGTTGACTGACATTC  
TCTTAATGTCAAAGATTGCATATTGGATTTCTCTAAGTCTGTGGCTGCACCGAAGGATCCGATCAAACCACTGA  
TTCCAATGGTACGAACGGCGGCAGAAATGCCACGCCAGACTGGACTATTGGAAAATTTGGTGGCGATGATCA  
AAAGAACTTTAATTCACCGGAGTTATCAGGAATAATCGACATTGAGAATACTGCATCTTAGTAGTAGATAA  
ATTTTTGATAGTTACTTGCTTAAAGAAAAAGAAAACCAAATAAAAATGTTTCTTTATTTGTAGAGAGTCTCT  
CAATAGATGGTTAGAGAAGCAGGAGCAAGTGACCATTGGTCAGCTTGCAGATTTTGATTTGTGGATCTTCCT  
GCCGTTGATCAGTACAGGCATATGATTAAAGCGCAACCTAAGCAGAAGCTGGATACATCAATTCAAAGCGAAT  
ATCCGGCCTTGCAGACGATTGTGTATCATTGAAAAAGATCAACGCAATCTTCGGTCTTTGTTGAGTGAGCTC  
ACAAGGCAAATGCTCGAAAGCATAGACTCAAGTAAGTTTTGTTCTTTACAAGGAAGACGCCAGCTCAAATTG  
AGGATTTCTTCGGAGATCTCGATAGCCATGTCCCTATGGATATCTTGAGTTGGATATTTGGAAGTATGACAAA  
TCTCAGAACGAGTTCCACTGTGCAGTAGAGTATGAAATATGGAGAAGACTTGGATTAGAAGATTTTCTGGGA  
GAAGTTTGAAACAAGGCCACAGGAAAACCTACTCTTAAAGATTACACAGCTGGTATTAACCGTGTTTATGGT  
ACCAGAGAAAAGAGTGGGGACGTTACAACATTCATCGGTAATACGGTGATTATTGCTGCTTGTTAGCTTCCAT  
GTTGCCCATGGAGAAAATAATCAAAGGTGCATTTTTCGGAGATGACAGTTTACTATACTTCCAAAAGGTTGT  
GAGTTTCTTGACATACAGCATACAGCCAACCTTATGTGGAATTTGAGGCTAAGCTATTCAGAAAGCAGTATG  
GTTATTTCTGTGGAAGGTACGTGATACATCATGACAGAGGGTGTATTGTTTATTATGACCTTTGAAGTTGATT  
TCTAAACTTGGTGCTAAACACATCAAGGATTGGGATCACTTAGAAGAGTTCAGAAGATCCCTTTGTGATGTTG  
CAAATTCGTTGAACAACTGTGCGTATTACACGCAGTTGGACGACGCTGTGAGTGAGGTCCATAAAACCGCACC  
CCCGGGTTCGTTTGATATAAAAGTTAGTTAAATATCTGTCCGATAAGGTTCTTTTAGAAGTTTGTATAGA  
TGGCTCTTGTTAAGGGTAAAGTCAATATTAATGAGTTCATAGACTTGTCAAAATCAGAAAAATTTCTCCGTCT  
ATGTTACACCTGTTAAGAGTGTGATGATCTCAAGGTTGATAAGATATTGGTTCATGAAGATGAATCTTTGTC  
CGAAGTCAATTTACTCAAAGGTGTAAACTCATTGATGGTGGCTATGTACATCTTGCTGGTCTTGTTGGTGACA  
GGTGAATGGAATTTGCCAGATAATTGTCGTGGTGGTGTGAGTGTCTGTTTGGTCGATAAAAGAATGGAGAGA  
GCGGACGAGGCAACTCTTGCTTCACTATACCGCAGCGGCTAAGAAAAGGTTTCAGTTCAAAGTCGTTCCAA  
ATTACAACATCACTACCAAGGACGCAAAAAAGGCAGTTTGGCAAGTACTAGTTAATATTAGAAATGTTAAAT  
TGCTGCGGGTACTGTCCGCTGTCATTAGAATTTGTGTGAGTGTGATTGTTTATAAAAAATATTATAAACTCG  
GTTTGAGAGAGAAAATTACGAGCGTAACGGATGGAGGGCCCATGGAAGTATCAGAAGAAGTTGTTGATGAG  
TTCATGGAAGAAGTCCCGATGTCTGTAAGGCTTGCAAAATTTGTTTGAAGACCGGGAAAAAGTTTAGTAGTA  
AAAGTGAGAATAATAGTGGTAATAATAGGCCGAAACCAACAAAAACCAAGGAAGGAAAAGGGTTAAAA  
GTTAGGGTTGAGAAGGATAATTTAATTGATAATGAATTGGAGACTTACGTCGCCGATTGAGATTCGTATTA  
TATGTCTTACACAATCGCAACTCCATCGCAATTTGTGTTTTGTGTCATCAGCATGGGCCGACCCTATAGAATTA  
AAATTTATGTACTAATTCAGTAAATCAATTCAAACACAACAAGCTAGAACAACCGTTCAACGGCAATTTA  
GCGAAGTGTGGAACCTGTCCCTCAAGTCACTGTTAGGTTTCTGACAGTGGTTTAAAGGTGTATAGGTACAA  
TGCGGTACTAGATCCTCTAGTTACTGCTTTGTTAGGAGCTTCGATACTAGAAATAGGATTATAGAAGTCGAAA  
ATCAGGCGAACCCGACAACCGCCGAAACGTTAGACGCTACTCGTAGAGTAGATGACGCAACGGTGGCTATAA  
GGAGCGCTATAAATAATTTAGTAGTAGAATTGGTCAAAGGAACAGGTTTGTACAATCAGAGCACATTTGAAA  
GTGCATCCGGTTACAATGGTCCTCTGCACCTGCATCTTGA

MN882020

ATGGCATACACACAGACAGCTACCACATCCGCTTTGCTCGACACTGTCCGAGGTAACAATACCTTGGTCAACG  
ATCTTGCGAAGCGGCGTCTTTATGACACAGCGGTGACGAGTTCAACGCTCGTGATCGCAGGCCCAAAGTAA  
ATTTTTCCAAAGTAATAAGTGAGGAACAGACGCTTATTGCTACTAGGGCATATCCAGAATTCCAGATAACCTC  
TATAATACGCAGAATGCCGTGCATTCGCTTGCCGGTGGACTACGATCCTTAGAACTGGAATATCTAATGATGC  
AGATCCCGTACGGATCACTCACATATGATATAGGTGGGAATTTGCATCTCATCTGTTCAAAGGACGGGCATA

TGTTCACTGCTGTATGCCCAATCTTGATGTCCGCGACATAATGCGGCACGAAGGCCAGAAAGACAGTATAGAA  
TTATACCTTTCCAGGCTTGAGCGGGGCAACAAAGTTGTCCCAAATTTCCAAAAGGAAGCTTTTGACAGATACG  
CTGAAACGCCAGACGAAGTTGTCTGTACAGTACCTTCCAAACGTGTACGCACCAGCAGGTGAAAAACACAG  
GCAGGGTGTATGCTATTGCACTGCACAGTATATACGATATACCTGCTGATGAATTCGGAGCGGCACTTTTAAG  
GAAAAATGTCCATGTTTGTTACGCCGCCTTCCACTTTTCCGAGAATTTACTTCTCGAAGATTCACACGTCAACCT  
TGACGAAATCAATGCGTGTTTTTCGCGTGATGGAGACAAGCTGACTTTTTCTTTCGCATCTGAGAGCACTTTAA  
ATTATTGTCATAGTTATTCTAATATTTTAAAATACGTGTGCAAACTTACTTCCCAGCATCTAATAGAGAGGTCT  
ACATGAAGGAGTTTTTGGTCACCAGGGTTAACACCTGGTTTTGTAAGTTTTCTAGGATAGATACTTTTTATTAT  
ACAAGGGGGTAGCCCACAAAGGTGTAAATAGTGAGCAATTTTACAGCGCAATGGAAGATGCATGGCACTACA  
AAAAGACTCTTGCAATGTGTAAACAGCGAGAGGATTCTTCTTGAAGATTCCTCATCGGTCAATTACTGGTTCCTCA  
AAAATGAGAGATATGGTCATAGTTCCTCTATTTCGACATATCTCTCGACACCAGTAAAAGGACCCGCAAAGAAG  
TCTTAGTGTCAAAGGATTTTGTATTACAGTTTTAAATCACATTTCGCACTTATCAAGCCAAGGCACTTACATACT  
CCAATGTTTTATCCTTTGTGCAATCAATTCGTTCAAGGGTAATTATCAACGGAGTGACTGCCAGGTCTGAGTGG  
GATGTTGACAAATCTTTTTGCAATCCTTGTCATGACATTTTTCTTGCATACTAAGCTTGCCGTTTTAAAAGAC  
GAATTGTTAATCAGCAAGTTTAGTTTGGGGCCAAAATCAGTAAGCCAGCATGTATGGGATGAGATTTCCCTGG  
CTTTTGAAACGCATTTCCATCGATCAAGGAGAGACTGCTAAATCGGAACTAATTAAGTGTCGGGAGACGC  
ATTAGAAATCAGGGTGCCTGATTTATATGTGACTTTTACGATAGATTAGTGACTGAGTACAAAACATCGGTG  
GATATGCCAGTGCTTGATATCAGAAAGAGAATGGAGGAGACTGAGGTTATGTACAATGCATTGTCTGAGCTA  
TCTGTGCTCAAGGAGTCGGACAAGTTTCGACGTTGATGTTTTTCCCAGGATGTGCCAGACTTTGGAGGTAGACC  
CAATGACTGCAGCAAAGGTTATTGTGGCAGTGATGAGCAACGAGAGCGGACTGACTCTTACATTGCAACAGC  
CAACTGAAGCAAATGTCGATTGGCACTTAAAGATTAGAAAAAGCCTCTGAGGGTGCCTAGTGTTACTTC  
TAGAGATGTTGAAGAACCATCCATGAAGGGTTCATGGCAAGAGGAGAGTTACAATTGGCCGGTCTGTCTGG  
AGACCAACCAGAGTCTTCTATACTCGGAACGAGGAAATAGAGTCATTAGAGCAATTCACATGGCAACGGCT  
AGTTCGTTAATTCGGAAACAGATGAGTTGATTGTGTACACGGGCCCATTAAGTTTCAGCAAATGAAAACT  
TTATTGATAGCCTGGTAGCATCACTCTCTGCTGCGGTGTGCAACCTAGTCAAGATCCTAAAGGATACAGCTGCT  
ATAGATCTCGAAACCCGTCAGAAGTTTGGAGTCTTAGATGTTGCGACCAAAGATGGTTAATTAACCTTTAG  
CCAAGAATCACGCATGGGGCGTTATTGAAACACATGCTAGGAAGTACCACGTTGCACTTTTGGAGTATGATGA  
GCATGGAGTGGTAACTTGCGACAGTTGGAGAAGGGTGGCCGTGAGTTCTGAGTCAATGGTTTATTCTGATAT  
GGCAAAGCTTAGAACACTGAGGAGATTATTAAGAGATGGTGAGCCTCATGTCAGCAGTGCTAAAGTCGTCT  
AGTTGACGGTGTCCCGGGTTTGGGAAAGACAAAAGAGATTCTCTCGAAAGTAAATTTGAGGAAGATCTAAT  
CTTAGTACCGGTAAGCAGGCTGCTGAAATGATAAAGAGGCGTGCTAATGCGTCAGGAATAATTCAAGCCAC  
AAGAGATAATGTTCTGACTGTTGATTCAATTTATAATGAATTACGGTAAAGGAACACGCTGTCAGTTCAAAGG  
TTATTTATCGACGAAGGTCTGATGTTGCACACTGGTTGTGTGAATTTCTTGTCTATGTCTCTGTGCGAAATT  
GCATATGTTTATGGAGACACACAACAAATTCATACATCAACAGAGTATCCGGTTTTCCGTACCCTGCACATTT  
TGCAAAAATAGAGTTGATGAGGTGGAAGTCTGCGAGAACTACGCTGCGTTGTCCAGCCGACATTACCACTAT  
CTTAACAGAAGGTACGAAGGACATGTCATGTGTACATCGTCGGTTAAAAAGTCGGTTTTCTCAGGAAATGGTG  
AGCGGGGCCGCAATGATCAATCCTGTATCTAAGCCATTGAATGGGAAAGTTTTGACTTTCACTCAGTCTGATA  
AAGAGGCGCTGCTTCTCGAGGATATACGGACGTCCATACAGTACATGAGGTACAAGGTGAGACATATGCAG  
ATGTGTCGTTGGTCAGATTGACTCCGACACCTGTATCTATCATCGCAGGAGATAGTCCGCACGTTCTCGTAGCT  
TTGTCAAGGCATACCCAAACATTGAAGTATTACACCGTAGTGATGGATCCTCTTGAAGTATAATTAGGGATTT  
AGAAAACTTAGTTCTTACTTGTTAGATATGTATAAAGTAGATGCAGGGACCCAATAGCAATTACAGGTAGAC  
TCCGTGTTCAAAGGTTCTAATCTTTTTGTTGCAGCACCAAAGACTGGAGATATCTCAGATATGCAATTTTACTAT  
GATAAGTGCTCCCAGGTAATAGCACCATGTTAAATAACTATGATGCTGTTACCATGAGGTTGACTGACATTT  
TCTTAATGTCAAAGATTGCATATTGGATTTCTCTAAGTCTGTGGCTGCACCGAAGGATCCGATCAAACCACTGA  
TTCCAATGGTACGAACGGCGGCAGAAAAGCCACGCCAGACTGGACTATTGGAAAATTTGGTGGCGATGATCA  
AAAGAACTTTAATTCACCGGAGTTATCAGGAATAATCGACATTGAGAATACTGCATCTTTAGTAGTAGATAA  
ATTTTTGATAGTTACTTGCTTAAAGAAAAAGAAAAACCAATAAAAAATGTTTCTTTATTTGTAGAGAGTCTCT  
CAATAGATGGTTAGAGAAGCAGGAGCAAGTGACCATTGGTCAGTTGCAGATTTTGATTTTGTGGATCTTCTCT

GCCGTTGATCAGTACAGGCATATGATTAAAGCGCAACCTAAGCAGAAGCTGGATACATCAATTCAAAGCGAAT  
ATCCGGCCTTGACAGACGATTGTGTATCATTGAAAAAGATCAACGCAATCTTCGGTCCTTTGTTTCAGTGAGCTC  
ACAAGGCAAATGCTCGAAAGCATAGACTCAAGTAAAGTTTTGTTCTTTACAAGGAAGGCGCCAGCTCAAATTG  
AGGATTTCTTCGGAGATCTCGATAGCCATGTCCCTATGGATATCTTGGAGTTGGATATTTTGAAGTATGACAAA  
TCTCAGAACGAGTTCCACTGTGACGTAGAGTATGAAATATGGAGAAGACTTGGATTAGAAGATTTTCTGGGA  
GAAGTTTGGAACAAGGCCACAGAAAACTACTCTTAAAGATTACACAGCTGGTATTAACGTTGTTTATGGT  
ACAGAGAAAAGAGTGGGGACGTTACAACATTCATCGGTAATACGGTGATTATTGCTGCTTGTGTTAGCATCCAT  
GTTGCCCATGGAGAAAATAATCAAAGGTGCATTTTGGGAGATGACAGTTTACTATACTTCCCAAAGGTTGT  
GAGTTTCTGACATACAGCATACAGCCAACCTTATGTGGAATTTGAGGCTAAGCTATTCAGAAAGCAGTATG  
GTTATTTCTGTGGAAGGTACGTGATACATCACGACAGAGGGTGTATTGTTTATTATGACCTTTGAAGTTGATT  
TCTAACTTGGTGCTAAACACATCAAGGATTGGGATCACTTAGAAGAGTTCAGAAGATCCCTTTGTGATGTTG  
CAAATTCGTTGAACAACCTGTGCGTATTACACGCAGTTGGACGACGCTGTGAGTGAGGTCCATAAAACCGCACC  
CCCGGGTTCGTTTGATATAAAAGTTAGTTAAATATCTGTCCGATAAGGTTCTTTTAGAAGTTTGTGTTATAGA  
TGGCTCTTGTTAAGGGTAAAGTCAATATTAATGAGTTCATAGACTTGTCAAATCAGAAAAATTTCTCCGCTCT  
ATGTTACACCTGTTAAGAGTGTGATGATCTCAAGGTTGATAAGATATTGGTTCATGAAGATGAATCTTTGTC  
CGAAGTCAATTTACTCAAAGGTGTAACCTCATTGATGGTGGCTATGTACATCTTGCTGGTCTGTGGTGACA  
GGTGAATGGAATTTGCCAGATAATTGTCGTGGTGGTGTGAGTGTCTGTTTGGTCGATAAGAGAATGGAGAGA  
GCGGACGAGGCAACTCTTGCTTCACTATACCGCAGCGGCTAAGAAAAGGTTTCAGTTCAAAGTCGTTCCAA  
ATTACAACATCACTACCAAGGACGCAGAAAAGGCAGTTTGGCAAGTACTAGTTAATATTAGAAATGTTAAAT  
TGCTGCGGGTACTGTCCGCTGTCATTAGAATTTGTGTGAGTGTGATTGTTTATAAAAATATTATAAACTCG  
GTTTGAGAGAGAAAATTACGAGCGTCACGGATGGAGGGCCTATGGAATATCAGAAGAAGTTGTTGATGAGT  
TCATGGAAGAAGTCCCGATGTCTGTAAGGCTTGCAAAATTTGTTTCGAAGACCGGAAAAAGTTTAGTAGTAA  
AAGTGAGAATAATAGTGGAATAATAGGCCGAAACCAAACAAAAACCAAAGGAAGGAAAAGGGTTTAAAG  
TTAGGGTTGAGAAGGATAATTTAATTGATAATGAATTGGAGACTTACGTCGCCGATTACAGATTCGTATTAAT  
ATGTCTTACACAATCGCAACTCCATCGCAATTTGTGTTTTGTGTCATCAGCATGGGCCGACCCTATAGAATTAATA  
AATTTATGTACTAATTCAGTGAATCAGTTCCAAACACAACAAGCTAGAACAAACCGTTCAACGGCAATTTAG  
CGAAGTGTGGAACCTGTCCCTCAAGTCACTGTTAGGTTTCTGACAGTGGTTTTAAGGTGTATAGGTACAAT  
GCGGTACTAGATCCTCTAGTTACTGCTTTGTTAGGAGCTTTCGATACTAGAAATAGGATTATAGAAGTCGAAA  
ATCAGGCGAACCCGACAACCGCCGAAACGTTAGACGCTACTCGTAGAGTAGATGACGCAACGGTGGCTATAA  
GGAGCGCTATAAATAATTTAGTAGTAGAATTGGTCAAAGGAACAGGTTTGTACAATCAGAGCACATTTGAAA  
GTGCATCCGGTTTACAATGGTCCTCTGCACCTGCATCTTGA

MN882028

ATGGCATACACACAGACAGCTACCACATCCGCTTTGCTCGACACTGTCCGAGGTAACAATACCTTGGTCAACG  
ATCTTGCGAAGCGGCGTCTTTATGACACAGCGGTGACGAGTTCAACGCTCGTGATCGCAGGCCCAAAGTAA  
ATTTTTCAAAGTAATAAGTGAGGAACAGACGCTTATTGCTACTAGGGCATATCCAGAATTCAGATAACCTTC  
TATAATACGCAGAACGCCGTGCATTCGCTTGCCGGTGGACTACGATCCTTAGAACTGGAATATCTAATGATGC  
AGATCCCGTACGGATCACTCACATATGATATAGGTGGGAATTTGTCATCTCATCTGTTCAAAGGACGAGCATA  
TGTTCACTGCTGTATGCCCAATCTTGATGTCCGCGACATAATGCGGCACGAAGGCCAGAAAGACAGTATAGAA  
TTATACCTTTCCAGGCTTGAGCGGGGCAACAAAGTTGTCCCAAATTTCAAAGGAAGCTTTTGACAGATACG  
CTGAAACGCCAGACGAAGTTGTCTGTACAGTACCTTCCAAACGTGTACGCACCAGCAGGTGGAAAACACAG  
GCAGGGTGTATGCTATTGCACTGCACAGTATATACGATATACCTGCTGATGAATTCGGAGCGGCACTTTTAAG  
GAAAAATGTCCATGTTTGTTACGCCGCCTTCCACTTTTCCGAGAATTTACTTCTCGAAGATTCACACGTCAAACCT  
TGACGAAATCAATGCGTGTTTTTCGCGTGATGGAGACAAGCTGACTTTTTCTTTCGCATCTGAGAGCACTTTAA  
ATTATTGTCATAGTTATTCTAATATTTTAAATACGTGTGCAAACTTACTTCCCGGCATCTAATAGAGAGGTCT  
ACATGAAGGAGTTTTTGGTCACCAGGGTTAACACCTGGTTTTGTAAGTTTTCTAGGATAGATACTTTTTTATTAT

ACAAGGGGGTAGCCCAAAAGGTGTAATAGTGAGCAATTTTACAGCGCAATGGAAGATGCATGGCACTACA  
AAAAGACTCTTGCAATGTGTAAACAGCGAGAGGATTCTTCTGAAGATTCTCATCGGTCAATTACTGGTTCCCA  
AAAATGAGAGATATGGTCATAGTTCCTCTATTTCGACATATCTCTCGACACCAGTAAAAGGACCCGCAAAGAAG  
TCTTAGTGTCAAAGGATTTTGTATTACAGTTTTAAATCACATTCGCACTTATCAAGCCAAGGCATTACATACT  
CCAATGTTTTATCCTTTGTGAATCAATTCTTCAAGGGTAATTATCAACGGAGTGACTGCCAGGTCTGAGTGG  
GATGTTGACAAATCTTTTTGCAATCCTTGTCATGACATTTTTCTGCATACTAAGCTTGCCGTTTTAAAGAC  
GAATTGTTAATCAGCAAGTTTAGTTTGGGGCCAAAATCAGTAAGCCAGCATGTATGGGATGAGATTTCCCTGG  
CTTTTGAAACGCATTTCCATCGATCAAGGAGAGACTGCTAAATCGGAACTAATTAAGTGTGGGAGACGC  
ATTAGAAATCAGGGTGCCTGATTTATATGTGACTTTTACGATAGATTAGTGACTGAGTACAAAACATCGGTG  
GATATGCCAGTGCTTGATATCAGAAAGAGAATGGAGGAGACTGAGGTTATGTACAATGCATTGTCTGAGCTA  
TCTGTGCTCAAGGAGTCGGACAAGTTCGACGTTGATGTTTTTCCCGATGTGCCAGACTTTGGAGGTAGACC  
CAATGACTGCAGCAAAGTTATTGTGGCAGTGATGAGCAACGAGAGCGGACTGACTCTTACATTGCAACAGC  
CAACTGAAGCAAATGTCGCATTGGCACTTAAAGATTGAGAAAAAGCCTCTGAGGGTGCCTAGTGGTTACTTC  
TAGAGATGTTGAAGAACCATCCATGAAGGGTCAATGGCAAGAGGAGATTACAATTGGCCGGTCTGTCTGG  
AGACCAACCAGAGTCTTCTATACTCGGAACGAGGAAATAGAGTCATTAGAGCAATTCACATGGCAACGGCT  
AGTTCGTTAATTCGGAACAGATGAGTTCGATTGTGTACACGGGCCCATTAAGTTCAGCAAATGAAAACT  
TTATTGATAGCCTGGTAGCATCACTCTCTGCTGCGGTGTGCAACCTAGTCAAGATCCTAAAGGATACAGCTGCT  
ATAGATCTCGAAACCCGTCAGAAGTTTGGAGTCTTAGATGTTGCGACCAAAGATGGTTAATTAACCTTTAG  
CCAAGAATCACGCATGGGGCGTTATTGAAACACATGCTAGGAAGTACCACGTTGCATTTTTGGAGTATGATGA  
GCATGGAGTGGTAACTTGCGACAGTTGGAGAAGGGTGGCCGTGAGTTCTGAGTCAATGGTTTATTCTGATAT  
GGCAAAGCTCAGAACTGAGGAGATTATTAAGAGATGGTGAGCCTCATGTCAGCAGTGCTAAAGTCGTCT  
AGTTGACGGTGTCCCGGGTTGTGGAAAGACAAAAGAGATTCTCTCGAAAGTAAATTTGAGGAAGATCTAAT  
CTTAGTACCGGGTAAGCAGGCTGCTGAAATGATAAAGAGGCGTGCTAATGCGTCAGGAATAATTCAAGCCAC  
AAGAGATAATGTTCTGACTGTTGATTCAATTATAATGAATTACGGTAAAGGAACACGCTGTCAGTTCAAAAGG  
TTATTTATCGACGAAGGTCTGATGTTGCACACTGGTTGTGTGAATTTTCTGTTTCTATGTCTCTGTGCGAAAT  
GCATATGTTTATGGAGACACACAACAATTCCATACATCAACAGAGTATCCGGTTTTCCGTACCCTGCACATTT  
TGCAAAAATAGAGGTTGATGAGGTGGAACTCGCAGAACTACGCTGCGTTGTCCAGCCGACATTACCCACTAT  
CTTAACAGAAGGTACGAAGGACATGTCATGTGTACATCGTCCGTTAAAAAGTCAGTTTCTCAGGAAATGGTGA  
GCGGGGCCGCAATGATCAATCCTGTATCTAAGCCATTGAATGGGAAAGTTTTGACTTTCCTCAGTCTGATAA  
AGAGGCGCTGCTTCTCGAGGATATACGGACGTCCATACAGTACATGAGGTACAAGGTGAGACATATGCAGA  
TGTGTCGTTGGTCAGATTGACTCCGACACCTGTATCTATCATCGCAGGAGATAGTCCGCACGTTCTCGTAGCTT  
TGTCAAGGCATACCCAAACATTGAAGTATTACACCGTAGTGATGGATCCTCTTGTAAGTATAATTAGGGATTTA  
GAAAACTTAGTTCTTACTTGTTAGATATGTATAAAGTAGATGCAGGGACCCAATAGCAATTACAGGTAGACT  
CCGTGTTTAAAGTTCTAATCTTTTTGTTGCAGCACCAAAGACTGGAGATATCTCAGATATGCAATTTTACTAT  
GATAAGTGTCTCCAGGTAATAGCACCATGTTAAATACTATGATGCTGTTACCATGAGGTTGACTGACATTTT  
TCTTAATGTCAAAGATTGCATATTGGATTTCTCTAAGTCTGTGGCTGCACCGAAGGATCCGATCAAACCACTGA  
TTCCAATGGTACGAACGGCGGCAGAAAAGCCACGCCAGACTGGACTATTGAAAATTTGGTGGCGATGATCA  
AAAGAACTTTAATTCACCGGAGTTATCAGGAATAATCGACATTGAGAATACTGCATCTTAGTAGTAGATAA  
ATTTTTGATAGTTACTTGCTTAAAGAAAAAGAAAACCAATAAAAAATGTTTCTTTATTTGTAGAGAGTCTCT  
CAATAGATGGTTAGAGAAGCAGGAGCAAGTGACCATTGGTCAGCTTGAGATTTTGATTTTGTGGATCTTCT  
GCCGTTGATCAGTACAGGCATATGATCAAAGCGCAACCTAAGCAGAAGCTGGATACATCAATTCAAAGCGAA  
TATCCGGCCTTGACAGCATTGTGTATCATTCGAAAAAGATCAACGCAATCTTCGGTCTTTGTTGAGTGAGCT  
CACAAGGCAAATGCTCGAAAGCATAGACTCAAGTAAGTTTTGTTCTTTACAAGGAAGGCGCCAGCTCAAATT  
GAGGATTTCTTCGAGATCTCGATAGCCATGTCCCTATGGATATCTTGGAGTTGGATATTTGAAAGTATGACA  
AATCTCAGAACGAGTTCCACTGTGCAGTAGAGTATGAAATATGGAGAAGACTTGGATTAGAAGATTTTCTGG  
GAGAAGTTTGGAACAAGGCCACAGAAAACTACTCTTAAAGATTACACAGCTGGTATTAAACGTGTTTATG  
GTACCAGAGAAAGAGTGGGGACGTTACAACATTATCGGTAATACGGTGATTATTGCTGCTTGTAGCATCC  
ATGTTGCCCATGGAGAAAATAATCAAAGGTGCATTTTGGGAGATGACAGTTTACTATACTTCCAAAAGGTT



GTGAGTTTCCTGACATACAGCATACAGCCAACCTTATGTGGAATTTTCGAGGCTAAGCTATTCAGAAAAGCAGTA  
TGGTTATTTCTGTGGAAGGTACGTGATACATCACGACAGAGGGTGTATTGTTTATTATGACCCTTTGAAGTTGA  
TTTCTAAACTTGGTGCTAAACACATCAAGGATTGGGATCACTTAGAAGAGTTCAGAAAGATCCCTTTGTGATGTT  
GCAAATTCGTTGAACAACTGTGCGTATTACACGCAGTTGGACGACGCTGTGAGTGAGGTCCATAAAACCGCAC  
CCCCGGGTTCTGTTGTATATAAAAGTTTAGTTAAATATCTGTCCGATAAGGTTCTTTTTAGAAGTTTGTTTATAG  
ATGGCTCTTGTTAAGGGTAAAGTCAATATTAATGAGTTCATAGACTTGTCAAATCAGAAAAATTTCTTCCGTC  
TATGTTACACCTGTTAAGAGTGTCTGATCTCCAAGTTGATAAGATATTGGTTCATGAAGATGAATCTTTGT  
CCGAAGTCAATTTACTCAAAGGTGTAAACTCATTGATGGTGGCTATGTACATCTTGCTGGTCTTGTTGGTGACA  
GGTGAATGGAATTTGCCAGATAATTGTCGTGGTGGTGTGAGTGTCTGTTTGGTCGATAAGAGAATGGAGAGA  
GCGGACGAGGCAACTCTTGCTTCATACTATACCGCAGCGGCTAAGAAAAGGTTTCAGTTCAAAGTCGTTCCAA  
ATTACAACATCACTACCAAGGACGCAGAAAAGGCAGTTTGGCAAGTACTAGTTAATATTAGAAATGTTAAAT  
TGCTGCGGGTTACTGTCCGCTGTCATTAGAATTTGTGTGAGTGTGATTGTTTATAAAAATATTATAAACTCG  
GTTTGAGAGAGAAAATTACGAGCGTCACGGATGGAGGGCCTATGGAATATCAGAAGAAGTTGTTGATGAGT  
TCATGGAAGAAGTCCCGATGTCTGTAAGGCTTGCAAAATTTCTGTTGGAAGACCGGAAAAAAGTTTAGTAGTAA  
AAGTGAGAATAATAGTGGTAATAATAGGCCGAAACCAAAACAAAAGGAAGGAAAAGGGTTTAAAG  
TTAGGGTTGAGAAGGATAATTTAATTGATAATGAATTGGAGACTTACGTCGCCGATTGAGATTGCTATTAAAT  
ATGTCTTACACAATCGCAACTCCATCGCAATTTGTGTTTTGTGTCATCAGCATGGGCCGACCCTATAGAATTAATA  
AATTTATGTACTAATTCAGTAGGTAATCAGTTCCAAACACAACAAGCTAGAACAAACCGTTCAACGGCAATTTAG  
CGAAGTGTGGAAACCTGTCCCTCAAGTCACTGTTAGGTTTCTGACAGTGGTTTTAAGGTGTATAGGTACAAT  
GCGGTACTAGATCCTCTAGTTACTGCTTTGTTAGGAGCTTCGATACTAGAAATAGGATTATAGAAGTCGAAA  
ATCAGGCGAACCCGACAACCGCCGAAACGTTAGACGCTACTCGTAGAGTAGATGACGCAACGGTGGCTATAA  
GGAGCGCTATAAATAATTTAGTAGTAGAATTGGTCAAAGGAACAGGTTTGTACAATCAGAGCACATTTGAAA  
GTGCATCCGGTTTACAATGGTCCTCTGCACCTGCATCTTGA

MN882030

ATGGCATAACACAGACAGCTACCACATCCGCTTTGCTCGACACTGTCCGAGGTAACAATACCTTGGTCAACG  
ATCTTGCGAAGCGGCGTCTTTATGACACAGCGGTGACGAGTTCAACGCTCGTGATCGCAGGCCCAAAGTAA  
ATTTTCCAAAGTAATAAGTGAGGAACAGACGCTTATTGCTACTAGGGCATATCCAGAATTCAGATAACCTTC  
TATAATACGCAGAACGCCGTGCATTGCTTCCGGTGGACTACGATCCTTAGAACTGGAATATCTAATGATGC  
AGATCCCGTACGGATCACTCACATATGATATAGGTGGGAATTTGCATCTCATCTGTTCAAAGGACGGGCATA  
TGTTCACTGCTGTATGCCAATCTTGATGTCCGCGACATAATGCGGCACGAAGGCCAGAAAGACAGTATAGAA  
TTATACCTTTCCAGGCTTGAGCGGGGCAACAAAGTTGTCCCAAATTTCCAAAAGGAAGCTTTTGACAGATACG  
CTGAAACGCCAGACGAAGTTGTCTGTACAGTACCTTCCAAACGTGTACGCACCAGCAGGTGGAAAACACAG  
GCAGGGTGTATGCTATTGCATTGCACAGTATATACGATATACCTGCTGATGAATTCGGAGCGGCACTTTTAAG  
GAAAAATGTCCATGTTTGTACGCCGCTTCCACTTTTCCGAGAATTTACTTCTCGAAGATTCACACGTCAACCT  
TGACGAAATCAACGCGTGTTTTTCGCGCGATGGAGACAAGCTGACTTTTTCTTTTCGCATCTGAGAGCACTTTAA  
ATTACTGTCATAGTTATTCTAATATTTTAAATACGTGTGCAAACTTACTTCCCGGCATCTAATAGAGAGGTCT  
ACATGAAGGAGTTTTTGGTCACCAGGGTTAACACCTGGTTTTGTAAGTTTTCTAGGATAGATACTTTTTTATTAT  
ACAAGGGGGTAGCCCACAAAGGTGTAAATAGTGAGCAATTTTACAGCGCAATGGAAGATGCATGGCACTACA  
AAAAGACTCTTGCAATGTGTAACAGCGAGAGGATTCTTCTGAAGATTCCTCATCGGTCAATTACTGGTCCCA  
AAAATGAGAGATATGGTCATAGTTCTCTATTGACATATCTCTCGACACCAGTAAAAGGACCCGCAAAGAAG  
TCTTAGTGTCAAAGGATTTTGTATTACAGTTTTTAAATCACATTCGCACTTATCAAGCCAAGGCACTTACATACT  
CCAATGTTTTATCCTTTGTGCAATCAATTCGTTCAAGGGTAATTATCAACGGAGTGACTGCCAGGTCTGAGTGG  
GATGTTGACAAATCTTTTTGCAATCCTTGTCATGACATTTTTCTTGCTACTAAGCTTGCCGTTTTAAAGAC  
GAATTGTTAATCAGCAAGTTTAGTTTGGGGCCAAAATCAGTAAGCCAGCATGTATGGGATGAGATTTCCCTGG  
CTTTTGAAACGCATTTCCATCGATCAAGGAGAGACTGCTAAATCGGAACTAATTAAGTGTCGGGAGACGC

ATTAGAAATCAGGGTGCCTGATTTATATGTGACTTTTCACGATAGATTAGTGACTGAGTACAAAACATCGGTG  
GATATGCCAGTGCTTGATATCAGAAAGAGAATGGAGGAGACTGAGGTTATGTACAATGCATTGTCTGAGCTA  
TCTGTGCTCAAGGAGTCGGACAAGTTCGACGTTGATGTTTTTCCCGATGTGCCAGACTTTGGAGGTAGACC  
CAATGACTGCAGCAAAGGTTATTGTGGCAGTGATGAGCAATGAGAGCGGACTGACTCTTACATTCGAACAGC  
CAACTGAAGCAAATGTCGCATTGGCACTTAAAGATTAGAAAAAGCCTCTGAGGGTGCCTAGTGGTTACTTC  
TAGAGATGTTGAAGAACCATCCATGAAGGGTTCATGGCAAGAGGAGAGTTACAATTGGCCGGTCTGTCTGG  
AGACCAACCAGAGTCTTCTATACTCGGAACGAGGAAATAGTGTCATTAGAGCAATTCCACATGGCAACGGCT  
AGTTCGTTAATTCGGAACAGATGAGTTCGATTGTGTACACGGGCCCCATTAAAGTTCAGCAAATGAAAACT  
TTATTGATAGCCTGGTAGCATCACTCTCTGCTGCGGTGTCGAACCTAGTCAAGATCCTAAAGGATACAGCTGCT  
ATAGATCTCGAAACCCGTCAGAAGTTTGGAGTCTTAGATGTTGCGACCAAAGATGGTTAATTAACCTTTAG  
CCAAGAATCACGCATGGGGCGTTATTGAAACACATGCTAGGAAGTACCACGTTGCACCTTTGGAGTATGATGA  
GCATGGAGTGGTAACTTGCGACAGTTGGAGAAGGGTGGCCGTGAGTTCTGAGTCAATGGTTTATTCTGATAT  
GGCAAAGCTCAGAACACTGAGGGGATTATTAAGAGATGGTGAGCCTCATGTCAGCAGTGCTAAAGTCGTCT  
AGTTGACGGTGTCCCGGGTGTGGAAAGACAAAAGAGATTCTCTCGAAAGTAAATTTGAGGAAGATCTAAT  
CTTAGTACCGGGTAAGCAGGCTGCTGAAATGATAAAGAGGCGTGCTAATGCGTCAGGAATAATTCAAGCCAC  
AAGAGATAATGTTCTGACTGTTGATTCAATTTATAATGAATTACGGTAAAGGAACACGCTGTCAGTTCAAAGG  
TTATTTATCGACGAAGGTCTGATGTTGCACACTGGTTGTGTGAATTTTCTGTTTCTATGTCTCTGTGCGAAAT  
GCATATGTTTATGGAGACACACAACAAATTCATACATCAACAGAGTATCCGGTTTTCCGTACCCTGCACATTT  
TGCAAAAATAGAGGTTGATGAGGTGGAACTCGCAGAACTACGCTGCGTTGTCCAGCCGACATTACTCACTAT  
CTTAACAGAAGGTACGAAGGACATGTCATGTGTACATCGTCGGTTAAAAAGTCAGTTTCTCAGGAAATGGTGA  
GCGGGGCCGCAATGATCAATCCTGTATCTAAGCCATTGAATGGGAAAGTTTGACTTTCAGTCTGATAA  
AGAGGCGCTGCTTCTCGAGGATATACGGACGTCCATACAGTACATGAGGTACAAGGTGAGACATATGCAGA  
CGTGTGCTTGGTCAGATTGACTCCGACACCTGTATCTATCATCGCAGGAGATAGTCCGCACGTTCTCGTAGCTT  
TGTCAGGCATACCCAAACATTGAAGTATTACACCGTAGTGATGGATCCTCTTGTAAGTATAATTAGGGATTTA  
GAAAACTTAGTTCTTACTTGTTAGATATGTATAAAGTAGATGCAGGGACCCAATAGCAATTACAGGTAGACT  
CCGTGTTTAAAGGTTCTAATCTTTTTGTTGCAGCACAAAGACTGGAGATATCTCAGATATGCAATTTTACTAT  
GATAAGTGTCTCCAGGTAATAGCACCATGTTAAATAACTATGATGCTGTTACCATGAGGTTGACTGACATTTT  
TCTTAATGTCAAAGATTGCATATTGGATTTCTCTAAGTCTGTGGCTGCACCGAAGGATCCGATCAAACCACTGA  
TTCCAATGGTACGAACGGCGGCAGAAATGCCACGCCAGACTGGACTATTGGAAAATTTGGTGGCGATGATCA  
AAAGAACTTCAATTCACCGGAGTTATCAGGAATAATCGACATTGAGAATACTGCATCTTTAGTAGTAGATAA  
ATTTTTGATAGTTACTTGCTTAAAGAAAAAGAAAACCAAATAAAAAATGTTTCTTTATTTGTAGAGAGTCTCT  
CAATAGATGGTTAGAGAAGCAGGAGCAAGTGACCATTGGTCAGCTTGCAGATTTTGATTTGTGGATCTTCT  
GCCGTTGATCAGTACAGGCATATGATTAAAGCGCAACCTAAGCAGAAGCTGGATACATCAATTCAAAGCGAAT  
ATCCGGCCTTGCAGACGATTGTGTATCATTGAAAAAGATCAACGCAATCTTCGGTCTTTGTTTCAGTGAGCTC  
ACAAGGCAAATGCTCGAAAGCATAGACTCAAGTAAGTTTTGTTCTTTACAAGGAAGACGCCAGCTCAAATTG  
AGGATTTCTTCGGAGATCTCGATAGCCATGTCCCTATGGATATCTTGAGTTGGATATTTGCAAGTATGACAAA  
TCTCAGAACGAGTTCCACTGTGCAGTAGAGTATGAAATATGGAGAAGACTTGGATTAGAAAATTTCTGGGA  
GAAGTTTGGAACAAGGCCACAGGAAAATACTCTTAAAGATTACACAGCTGGTATTAAACGTGTTTATGGT  
ACCAGAGAAAGAGTGGGGACGTTACAACATTCATCGGTAATACGGTGATTATTGCTGCTTGTGTTAGCTTCCAT  
GTTGCCCATGGAGAAAATAATCAAAGGTGCATTTTGCGGAGATGACAGTTTACTATACTTCCAAAAGGTTGT  
GAGTTTCTGACATACAGCATACAGCCAACCTTATGTGGAATTTGAGGCTAAGCTATTCAGAAAGCAGTATG  
GTTATTTCTGTGGAAGGTACGTGATACATCATGACAGAGGGTGTATTGTTTATTATGACCTTTGAAGTTGATT  
TCTAACTTGGTGCTAAACACATCAAGGATTGGGATCACTTAGAAGAGTTCAGAAGATCCCTTTGTGATGTTG  
CAAATTCGTTGAACAACTGTGCGTATTACACGCAGTTGGACGACGCTGTGAGTGAGGTCCATAAAACCGCAC  
CCCGGTTCTGTTGTATATAAAAGTTAGTTAAATATCTGTCCGATAAGGTTCTTTTGAAGTTTGTATAGA  
TGCTCTTGTGAAGGGTAAAGTCAATATTAATGAGTTCATAGACTTGTCAAATCAGAAAAATTTCTTCCGTCT  
ATGTTACACCTGTTAAGAGTGTGATGATCTCAAGGTTGATAAGATATTGGTTCATGAAGATGAATCTTTGTC  
CGAAGTCAATTTACTCAAAGGTGTAAGTCAATGATGGTGGCTATGTACATCTTGCTGGTCTTGTGGTGACA

GGTGAATGGAATTTGCCAGATAATTGTCGTGGTGGTGTCAAGTGTCTGTTTGGTCGATAAGAGAATGGAGAGA  
GCGGACGAGGCAACTCTTGCTTCATACTATACCGCAGCGGCTAAGAAAAGGTTTCAGTTCAAAGTCGTTCCAA  
ATTACAACATCACTACCAAGGACGCAGAAAAGGCAGTTTGGCAAGTACTAGTTAATATTAGAAATGTTAAAAAT  
TGCTGCGGGTTACTGTCCGCTGTCATTAGAATTTGTGTCAAGTGTGTATTGTTTATAAAAAATATTATAAACTCG  
GTTTGAGAGAGAAAAATTACGAGCGTCACGGATGGAGGGCCCATGGAATATCAGAAGAAGTTGTTGATGAG  
TTCATGGAAGAAGTCCCGATGTCTGTAAGGCTTGCAAAATTTGTTTGAAGACCGGAAAAAAGTTTAGTAGTA  
AAAGTGAGAATAATAGTGGTAATAATAGGCCGAAACCAACAAAAACCAAGGAAGGAAAAGGGTTTAAAA  
GTTAGGGTTGAGAAGGATAATTTAATTGATAATGAATTGGAGACTTACGTCGCCGATTGAGATTGCTATTAAA  
TATGTCTTACACAATCGCAACTCCATCGCAATTTGTGTTTTTGTATCAGCATGGGCCGACCCTATAGAATTAAT  
AAATTTATGTACTAATTCAGTGGTAATCAGTTCCAAACACAACAAGCTAGAACAACCGTTCAACGGCAATTTA  
GCGAAGTGTGGAACCTGTCCCTCAAGTCACTGTTAGGTTTCTGACAGTGGTTTTAAGGTGTATAGGTACAA  
TGCGGTACTAGATCCTCTAGTTACTGCTTTGTTAGGAGCTTTGATACTAGAAATAGGATTATAGAAGTCGAAA  
ATCAGGCGAACCCGACAACCGCCGAAACGTTAGACGCTACTCGTAGAGTAGATGACGCAACGGTGGCTATAA  
GGAGCGCTATAAATAATTTAGTAGTAGAATTGGTCAAAGGAACAGGTTTGTACAATCAGAGCACATTTGAAA  
GTGCATCCGTTTACAATGGTCCTCTGCACCTGCATCTTGA

MN882041

ATGGCATACACACAGACAGCTACCACATCCGCTTTGCTCGACACTGTCCGAGGTAACAATACCTTGGTCAACG  
ATCTTGCGAAGCGGCGTCTTTATGACACAGCGGTGCGAGGTTCAACGCTCGTGATCGCAGGCCCAAAGTAA  
ATTTTTCCAAAGTAATAAGTGAGGAACAGACGCTTATTGCTACTAGGGCATATCTGAATTCAGATAACCTTC  
TATAATACGCAGAACGCCGTGCATTGCTTGCCGGTGGACTACGATCCTTAGAACTGGAATATCTAATGATGC  
AGATCCCGTACGGATCACTCACATATGATATAGGTGGGAATTTTGCATCTCATCTGTTCAAAGGACGGGCATA  
TGTTCACTGCTGTATGCCAATCTTGATGTCCGCGACATAATGCGGCACGAAGGCCAGAAAGACAGTATAGAA  
TTATACCTTTCCAGGCTTGAGCGGGGCAACAAAGTTGTCCCAAATTTCCAAAAGGAAGCTTTTGACAGATACG  
CTGAAACGCCAGACGAAGTTGTCTGTACAGTACCTTCCAAACGTGTACGCACCAGCAGGTGGAAAACACAG  
GCAGGGTGTATGCTATTGCATTGCACAGTATATACGATATACCTGCTGATGAATTCGGAGCGGCACTTTTAAG  
GAAAAATGTCCATGTTTGTACGCCGCCTTCCACTTTTCCGAGAATTTACTTCTCGAAGATTCACACGTCAACCT  
TGACGAAATCAACGCGTGTTTTTCGCGTGATGGAGACAAGCTGACTTTTTCTTTCGCATCTGAGAGCACTTTAA  
ATTATTGTCATAGTTATTCTAATATTTTAAAATACGTGTGCAAACTTACTTCCCGGCATCTAATAGAGAGGTCT  
ACATGAAGGAGTTTTTGGTCACCAGGGTTAACACCTGGTTTTGTAAGTTTTCTAGGATAGATACTTTTTTATTAT  
ACAAGGGGGTAGCCCACAAAGGTGTAAATAGTGAGCAATTTTACAGCGCAATGGAAGATGCATGGCACTACA  
AAAAGACTCTTGCAATGTGTAAACAGCGAGAGGATTCTTCTGAAGATTCCTCATCGGTCAATTACTGGTTCCCA  
AAAATGAGAGATATGGTCATAGTTCTCTATTGACATATCTCTCGACACTAGTAAAAGGACCCGCAAAGAAG  
TCTTAGTGCAAAGGATTTTGTATTACAGTTTTTAATCACATTGCACTTATCAAGCCAAGGCACTTACATACT  
CCAATGTTTTATCCTTTGTGAATCAATTCGTTCAAGGGTAATTATCAACGGAGTGACTGCCAGGTCTGAGTGG  
GATGTTGACAAATCTTTTTGCAATCCTTGTCATGACATTTTTCTTGCACTAAGCTTGCCGTTTTAAAAGAC  
GAATTGTTAATCAGCAAGTTTAGTTTGGGGCCAAAATCAGTAAGCCAGCATGTATGGGATGAGATTTCCCTGG  
CTTTTGAAACGCATTTCCATCGATCAAGGAGAGACTGCTAAATCGGAACTAATTAAGTGTCGGGAGACGC  
ATTAGAAATCAGGGTGCCTGATTTATATGTGACTTTTACGATAGATTAGTGACTGAGTACAAAACATCGGTG  
GATATGCCAGTGCTTGATATCAGAAAGAGAATGGAGGAGACTGAGGTTATGTACAATGCATTGTCTGAGCTA  
TCTGTGCTCAAGGAGTCGGACAAGTTGACGTTGATGTTTTTCCCGGATGTGCCAGACTTTGGAGGTAGACC  
CAATGACTGCAGCAAAGGTTATTGTGGCAGTGATGAGCAACGAGAGCGGACTGACTCTTACATTGAAACAGC  
CAACTGAAGCAAATGTGCAATTGGCACTTAAAGATTGAGAAAAAGCCTCTGAGGGTGCACTAGTGGTTACTTC  
TAGAGATGTTGAAGAACCATCCATGAAGGGTTCAATGGCAAGAGGAGAGTTACAATTGGCCGGTCTGTCTGG  
AGACCAACCAGAGTCTTCTATACTCGGAACGAGGAAATAGAGTCATTAGAGCAATTCCACATGGCAACGGCT  
GGTTCGTTAATTCGGAAACAGATGAGTTCGATTGTGTACACGGGCCCCATTAAAGTTCAGCAAATGAAAACT

TTATTGATAGCCTGGTAGCATCACTCTCTGCTGCGGTGTCGAACCTAGTCAAGATCCTAAAGGATACAGCTGCT  
ATAGATCTCGAAACCCGTCAGAAGTTTGGAGTCTTAGATGTTGCGACCAAAGATGGTTAATTAACCTTTAG  
CCAAGAATCACGCATGGGGCGTTATTGAAACACATGCTAGGAAGTACCACGTTGCACTTTTGGAGTATGATGA  
GCATGGAGTGGTAACTTGCGACAGTTGGAGAAGGGTGGCCGTGAGTTCTGAGTCAATGGTTTATTCTGATAT  
GGCAAAGCTCAGAACACTGAGGAGATTATTAAGAGATGGTGAGCCTCATGTCAGCAGTGCTAAAGTCGTCT  
AGTTGACGGTGTCCCGGTTGTGGAAAGACAAAAGAGATTCTCTCGAAAGTAAATTTTGGAGGAAGATCTAAT  
CTTAGTACCGGGTAAGCAGGCTGCTGAAATGATAAAGAGGGCTGCTAATGCGTCAGGAATAATTCAAGCCAC  
AAGAGATAATGTTTCGTACTGTTGATTCATTATAATGAATTACGGTAAAGGAACACGCTGTCAGTTCAAAGG  
TTATTTATCGACGAAGGTCTGATGTTGCACACTGGTTGTGTGAATTTCTTGTCTATGTCTCTGTGCGAAATT  
GCATATGTTTATGGAGACACACAACAAATTCCATACATCAACAGAGTATCCGGTTTTCCGTACCCTGCACATTT  
TGCAAAAATAGAGTTGATGAGGTGGAACTCGCAGAACTACGCTGCGTTGTCCAGCCGACATTACCCACTAT  
CTTAACAGAAGGTACGAAGGACATGTCATGTGTACATCGTCGGTTAAAAAGTCAGTTTCTCAGGAAATGGTGA  
GCGGGGCCGCAATGATCAATCCTGTATCTAAGCCATTGAATGGGAAAGTTTGACTTTCACTCAGTCTGATAA  
AGAGGCGCTGCTTCTCGAGGATATACGGACGTCCATACAGTACATGAGGTACAAGGTGAGACATATGCAGA  
TGTGTCGTTGGTCAGATTGACTCCGACACCTGTATCTATCATCGCAGGAGATAGTCCGCACGTTCTCGTAGCTT  
TGTC AAGGCATACCCAAACATTGAAGTATTACACCGTAGTGATGGATCCTCTTGTAAGTATAATTAGGGATTTA  
GAAAACTTAGTTCTTACTTGTTAGATATGTATAAAGTAGATGCAGGGACCCAATAGCAATTACAGGTAGACT  
CCGTGTTTAAAGGTTCTAATCTTTTTGTTGCAGCACCAAAGACTGGAGATATCTCAGATATGCAATTTTACTAT  
GATAAGTGTCTCCAGGTAATAGCACCATGTTAAATAACTATGATGCTGTTACCATGAGGTTGACTGACATTTCT  
TCTTAATGTCAAAGATTGCATATTGGATTTCTCTAAGTCTGTGGCTGCACCGAAGGATCCGATCAAACCACTGA  
TTCCAATGGTACGAACGGCGGCAGAAATGCCACGCCAGACTGGACTATTGGAAAATTTGGTGGCGATGATCA  
AAAGAACTTTAATTCACCGGAGTTATCAGGAATAATCGACATTGAGAATACTGCATCTTTAGTAGTAGATAA  
ATTTTTGATAGTTACTTGCTTAAAGAAAAAGAAAACCAAATAAAAAATGTTTCTTTATTTGTAGAGAGTCTCT  
CAATAGATGGTTAGAGAAGCAGGAGCAAGTGACCATTGGTCAGCTTGCAGATTTTGATTTTGTGGATCTTCT  
GCCGTTGATCAGTACAGGCATATGATTAAAGCGCAACCTAAGCAGAAGCTGGATACATCAATTCAAAGCGAAT  
ATCCGGCCTTGACAGCAGATTGTGTATCATTGAAAAAGATCAACGCAATCTTCGGTCCTTTGTTCAAGTGTGCTC  
ACAAGGCAAATGCTCGAAAGCATAGACTCAAGTAAGTTTTTGTCTTTACAAGGAAGACGCCAGCTCAAATTG  
AGGATTTCTTCGGAGATCTCGATAGCCATGTCCCTATGGATATCTTGAGTTGGATATTTGGAAGTATGACAAA  
TCTCAGAACGAGTTCCACTGTGCAGTAGAGTATGAAATATGGAGAAGACTTGGATTAGAAGATTTTCTGGGA  
GAAGTTTGAAACAAGGCCACAGGAAAACCTACTCTTAAAGATTACACAGCTGGTATTAAACGTGTTTATGGT  
ACCAGAGAAAGAGTGGGGACGTTACAACATTCATCGGTAATACGGTGATTATTGCTGCTTGTTTAGCTTCCAT  
GTTGCCCATGGAGAAAATAATCAAAGGTGCATTTTTCGGAGATGACAGTTTACTATACTTCCCAAAGGTTGT  
GAGTTTCTGACATACAGCATACAGCCAACCTTATGTGGAATTTGAGGCTAAGCTATTCAGAAAAGCAGTATG  
GTTATTTCTGTGGAAGGTACGTGATACATCATGACAGAGGGTGTATTGTTTATTATGACCTTTGAAGTTGATT  
TCTAACTTGGTGCTAAACACATCAAGGATTGGGATCACTTAGAAGAGTTCAGAAGATCCCTTTGTGATGTTG  
CAAATTCGTTGAACAACCTGTGCGTATTACACGCAGTTGGACGACGCTGTGAGTGAGGTCCATAAAACCGCACCC  
CCCGGTTTCGTTTGATATATAAAAGTTTAGTTAAATATCTGTCCGATAAGGTTCTTTTAGAAGTTTGTATAGA  
TGGCTCTTGTTAAGGGTAAAGTCAATATTAATGAGTTCATAGACTTGTCAAAATCAGAAAAATTTCTCCGTCT  
ATGTTACACCTGTTAAGAGTGTGATGATCTCCAAGGTTGATAAGATATTGGTTCATGAAGATGAATCTTTGTC  
CGAAGTCAATTTACTCAAAGGTGTAACCTCATTGATGGTGGCTATGTACATCTTGCTGGTCTTGTTGGTGACA  
GGTGAATGGAATTTGCCAGATAATTGTCGTGGTGGTGTGAGTGTCTGTTTGGTCGATAAAAGAATGGAGAGA  
GCGGACGAGGCAACTCTTGCTTCATACTATACCGCAGCGGCTAAGAAAAGGTTTCAGTTCAAAGTCGTTCCAA  
ATTACAACATCACTACCAAGGACGCAGAAAAGGCAGTTTGGCAAGTACTAGTTAATATTAGAAATGTTAAAT  
TGCTGCGGGTTACTGTCCGCTGTCATTAGAATTTGTGTGAGTGTGATTGTTTATAAAAAATATTATAAACTCG  
GTTTGAGAGAGAAAATTACGAGCGTCACGGATGGAGGGCCCATGGAATATCAGAAGAAGTTGTTGATGAG  
TTCATGGAAGAAGTCCCGATGTCTGTAAGGCTTGCAAAATTTGTTTCGAAGACCGGGAAAAAGTTTAGTAGTA  
AAAGTGAGAATAATAGTGGTAATAATAGGCCGAAACCAAACAAAAACCAAAGGAAGGAAAAGGGTTTAAAA  
GTTAGGGTTGAGAAGGATAATTTAATTGATAATGAATTGGAGACTTACGTCGCCGATTGAGATTCGTATTA

TATGTCTTACACAATCGCAACTCCGTCGCAATTTGTGTTTTTGTATCAGCATGGGCCGACCCTATAGAATTAAT  
AAATTTATGTACTAATTCAGTAGGTAATCAATTCAAACACAACAAGCTAGAACAACCGTTCAACGGCAATTTA  
GCGAAGTGTGGAAACCTGTCCCTCAAGTCACTGTTAGGTTTCCTGACAGTGGTTTTAAGGTGTATAGGTACAA  
TGCGGTACTAGATCCTCTAGTTACTGCTTTGTTAGGAGCTTCGATACTAGAAATAGGATTATAGAAGTCGAAA  
ATCAGGCGAACCCGACAACCGCCGAAACGTTAGACGCTACTCGTAGAGTAGATGACGCAACGGTGGCTATAA  
GGAGCGCTATAAATAATTTAGTAGTAGAATTGGTCAAAGGAACAGGTTTGTACAATCAGAGCACATTTGAAA  
GTGCATCCGGATTACAATGGTCCTCTGCACCTGCATCTTGA

MN882042

ATGGCATAACACAGACAGCTACCACATCCGCTTTGCTCGACACTGTCCGAGGTAACAATACCTTGGTCAATG  
ATCTTGCGAAGCGGCGTCTTTATGACACAGCGGTGCGACGAGTTCAACGCTCGTGATCGCAGGCCCAAAGTAA  
ATTTTTCCAAAGTAATAAGTGAGGAACAGACGCTTATTGCTACTAGGGCATATCCAGAATTCCAGATAACCTTC  
TATAATACGCAGAACGCCGTGCATTGCTTCCGGTGGACTACGATCCTTAGAACTGGAATATCTAATGATGC  
AGATCCCGTACGGATCACTCACATATGATATAGGTGGGAATTTGCATCACATCTGTTCAAAGGACGGGCATA  
TGTTCACTGCTGTATGCCAATCTTGATGTCCGCGACATAATGCGGCACGAAGGCCAGAAAGACAGTATAGAA  
TTATACCTTTCCAGGCTTGAGCGGGGCAACAAAGTTGTCCCAAATTTCCAAAAGGAAGCTTTTGACAGATACG  
CTGAAACGCCAGACGAAGTTGTCTGTACAGTACCTTCCAAACGTGTACGCACCAGCAGGTGGAAAACACAG  
GCAGGGTGTATGCTATTGCATTGCACAGTATATACGATATACCTGCTGATGAATTCGGAGCGGCACTTTTAAG  
GAAAAATGTCCATGTTTGTACGCCGCCTTCCACTTTTCCGAGAATTTACTTCTCGAAGATTCACACGTCAACCT  
TGACGAAATCAACGCGTGTTCCTGCGTGATGGAGACAAGCTGACTTTTCTTTCGCATCTGAGAGCACTTTAA  
ATTATTGTCATAGTTATTCTAATATTTTAAAATACGTGTGCAAACTTACTTCCCGGCATCTAATAGAGAGGTCT  
ACATGAAGGAGTTTTTAGTCACCAGGGTTAACACCTGGTTTTGTAAGTTTTCTAGGATTGATACTTTTTTATTAT  
ACAAGGGGGTAGCCCAAAAGGTGTAAATAGTGAGCAATTTTACAGCGCAATGGAAGATGCATGGCACTACA  
AAAAGACTCTTGCAATGTGTAAACAGCGAGAGGATTCTTCTGAAGATTCTCATCGGTCAATTACTGGTTCCCA  
AAAATGAGAGATATGGTCATAGTTCTCTATTGACATATCTCTCGACACCAGTAAAAGGACCCGCAAAGAAG  
TCTTAGTGCAAAGGATTTTGTATTACAGTTTTAAATCACATTCGCACTTATCAAGCCAAGGCATTACATACT  
CCAATGTTTTATCCTTTGTGAATCAATTCGTTCAAGGGTAATTATCAACGGAGTGACTGCTAGGTCTGAGTGG  
GATGTTGACAAATCTCTTTTGAATCCTTGTCATGACATTTTCTTGCATACTAAGCTTGCCGTTTTAAAAGAC  
GAATTGTTAATCAGCAAGTTTAGTTTGGGGCCAAAATCAGTAAGCCAGCATGTATGGGATGAGATTTCCCTGG  
CTTTTGAAACGCATTTCCATCGATCAAGGAGAGACTGCTAAATCGGAACTAATTAAGTGTGCGGAGACGC  
ATTAGAAATCAGGGTGCCTGATTTATATGTGACTTTTACGATAGATTAGTGACTGAGTACAAAACATCGGTG  
GATATGCCAGTGCTTGATATCAGAAAGAGAATGGAGGAGACTGAGGTTATGTACAATGCATTGTCTGAGCTA  
TCTGTGCTCAAGGAGTCGGACAAGTTGACGTTGATGTTTTTCCCGGATGTGCCAGACTTTGGAGGTAGACC  
CAATGACTGCAGCAAAGGTTATAGTGGCAGTGATGAGCAACGAGAGCGGACTGACTCTTACATTGCAACAGC  
CAACTGAAGCAAATGTCGATTGGCACTTAAAGATTGAGAAAAAGCCTCTGAGGGTGCCTAGTGTTACTTC  
TAGAGATGTTGAAGAACCATCCATGAAGGGTTCAATGGCAAGAGAGAGTTACAATTGGCCGGTCTGTCTGG  
AGACCAACCAGAGTCTTCCTATACTCGGAACGAGGAAATAGAGTCATTAGAGCAATTCACATGGCAACGGCT  
AGTTCGTTAATTCGGAAACAGATGAGTTCGATTGTGTACACGGGCCCATTAAGTTTACAGCAATGAAAACT  
TTATTGATAGCCTGGTAGCATCACTCTCTGCTGCGGTGTGCAACCTAGTCAAGATCCTAAAGGATACAGCTGCT  
ATAGATCTCGAAACCCGTCAGAAGTTTGGAGTCTTAGATGTTGCGACCAAAGATGGTTAATTAACCTTTAG  
CCAAAAATCACGCATGGGGCGTTATTGAAACACATGCTAGGAAGTACCACGTTGCACTTTTGGAGTATGATGA  
GCATGGAGTGGTAACTTGCGACAGTTGGAGAAGGGTGGCCGTGAGTTCTGAGTCAATGGTTTATTCTGATAT  
GGCAAAGCTCAGAACACTGAGGAGATTATTAAGAGATGGTGAGCCTCATGTCAGCAGTGCTAAAGTCGTCT  
AGTTGACGGTGTCCCGGGTTGTGGAAAGACAAAAGAGATTCTCTCGAAAGTAAATTTGAGGAAGATCTAAT  
CTTAGTACCGGGTAAGCAGGCTGCTGAAATGATAAAGAGGCGTGCTAATGCGTCAGGAATAATTCAAGCCAC  
AAGAGATAATGTTCTGACTGTTGATTCAATTTATAATGAATTACGGTAAAGGAACACGCTGTCAGTTCAAAGG

TTATTTATCGACGAAGGTCTGATGTTGCACACTGGTTGTGTGAATTTCTTGTTTCTATGTCTCTGTGCGAAATT  
GCATATGTATATGGAGACACACAACAAATTCCATACATCAACAGAGTATCCGGTTTTCCGTACCCCTGCACATTT  
TGCAAAAATAGAGGTTGATGAGGTGGAACTCGCAGAACTACGCTGCGTTGTCCAGCCGACATTACCCACTAT  
CTTAACAGAAGGTACGAAGGACATGTCATGTGTACATCGTCGGTTAAAAAGTCAGTTTCTCAGGAAATGGTGA  
GCGGGGCCGAATGATCAATCCTGTATCTAAGCCATTGAATGGGAAAGTTTTGACTTTCACTCAGTCCGATAA  
AGAGGCGCTGCTTTCTCGAGGATATACGGACGTCCATACAGTACATGAGGTACAAGGTGAGACATATGCAGA  
TGTGTCGTTGGTCAGATTGACTCCGACACCTGTATCTATCATCGCAGGAGATAGTCCGCACGTTCTCGTAGCTT  
TGTCAAGGCATACCCAAACATTGAAGTATTACCCGTAGTGATGGATCCTCTTGTAAGTATAAATTAGGGATTTA  
GAAAACTTAGTTCTTACTTGTTAGATATGTATAAAGTAGATGCAGGGACCCAATAGCAATTACTGGTAGACT  
CCGTGTTTAAAGGTTCTAATCTTTTTGTTGCAGCACCAAGACTGGAGATATCTCAGATATGCAATTTTACTAT  
GATAAGTGTCTCCAGGTAATAGCACCATGTTAAATACTATGATGCTGTTACCATGAGGTTGACTGACATTTT  
TCTTAATGTCAAAGATTGCATATTGGATTTCTCTAAGTCTGTGGCTGCACCGAAGGATCCGATCAAACCACTGA  
TTCCAATGGTACGAACGGCGGCAGAAATGCCACGCCAGACTGGACTATTGGAAAATTTGGTGGCGATGATCA  
AAAGAACTTTAATTCACCGGAGTTATCAGGAATAATCGACATTGAGAATACTGCATCTTTGGTAGTAGATAA  
ATTTTTGATAGTTACTTGCTTAAAGAAAAAGAAAAACCAAATAAAAAATGTTTCTTTATTTGTAGAGAGTCTCT  
CAATAGATGGTTAGAGAAGCAGGAGCAAGTGACCATTGGTCAGCTTGCAGATTTTGATTTTGTGGATCTTCCT  
GCCGTTGATCAGTACAGGCATATGATTAAAGCGCAACCTAAGCAGAAGCTGGATACATCAATTCAAAGCGAAT  
ATCCGGCCTTGACAGACGATTGTGTATCATTGAAAAAGATCAACGCAATCTTCGGTCCTTTGTTCAGTGAGCTC  
ACAAGGCAAATGCTCGAAAGCATAGACTCAAGTAAGTTTTGTCTTTACAAGGAAGACGCCAGCTCAAATCG  
AGGATTTCTTCGGAGATCTCGATAGCCATGTCCCTATGGATATCTTGAGTTGGATATTTGGAAGTATGACAAA  
TCTCAGAACGAGTTCCACTGTGCAGTAGAGTATGAAATATGGAGAAGACTTGGATTAGAAGATTTTCTGGGA  
GAAGTTTGAAACAAGGCCACAGAAAACTACTCTTAAAGATTACACAGCTGGTATTAACCGTGTTTATGGT  
ACCAGAGAAAAGAGTGGGGACGTTACAACATTATCGGTAATACGGTGATTATTGCTGCTTGTTAGCTTCCAT  
GTTGCCCATGGAGAAAATAATCAAAGGTGCATTTTTCGGAGATGACAGTTTACTATACTTCCAAAAGGTTGT  
GAGTTTCCCGACATACAGCATACAGCTAACCTTATGTGGAATTTTCGAGGCTAAGCTATTCAGAAAGCAGTATG  
GTTATTTCTGTGGAAGGTACGTGATACATCATGACAGAGGGTGTATTGTTTATTACGACCTTTGAAGTTGATT  
TCTAACTTGGTGCTAAACACATCAAGGATTGGGATCACTTAGAAGAGTTCAGAAGATCCCTTTGTGATGTTG  
CAATTTCTGTTGAACAACTGTGCGTATTACACGCAAGTTGGACGACGCTGTGAGTGAGGTCCATAAAACCGCACC  
CCCGGTTCTGTTTGTATAAAAGTTTAGTTAAATATCTGTCCGATAAGGTTCTTTTTAGAAGTTTGTATAGA  
TGGCTCTTGTAAGGGTAAAGTCAATATTAATGAGTTCATAGACTTGTCAAAATCAGAAAAATTTCTCCGTCT  
ATGTTACACCTGTTAAGAGTGTGATCTCCAAGGTTGATAAGATATTGGTTCATGAAGATGAATCTTTGTC  
CGAAGTCAATTTACTCAAAGGTGTAAACTCATTAAATGGTGGCTATGTACATCTTGCTGGTCTTGTAGTGACAG  
GTGAATGGAATTTGCCAGATAATTGTCGTGGTGGTGTGAGTGTCTGTTTGGTCGATAAGAGAATGGAGAGAG  
CGGACGAGGCAACTCTTGCTTCATACTATACCGCAGCGGCTAAGAAAAGGTTTCAGTTCAAAGTCGTTCCAAA  
TTACAACATCACTACCAAGGACGCAGAAAAGGCAGTTTGGCAAGTACTAGTTAATATTAGAAATGTTAAAATT  
GCTGCGGGTTACTGTCCGCTGTCATTAGAATTTGTGTGAGTGTGTATTGTTTATAAAAATATTATAAACTCGG  
TTTGAGAGAGAAAATTACGAGCGTCACGGAAGGAGGGCCCATGGAATATCAGAAGAAGTTGTTGATGAGTT  
CATGGAAGAAGTCCCGATGTCTGTAAGGCTTGCAAAATTTGTTTCGAAGACCGGGAAAAAGTTTAGTAGTAA  
AAGTGAGAATAATAGTGGAATAATAGGCCGAAACCAGACAAAAACCAAAGGAAGGAAAAGGGTTTAAAG  
TTAGGGTTGAGAAGGATAATTTAATTGATAATGAATTGGAGACTTACGTCGCCGATTAGATTTCGTATTAAT  
ATGTCTTACACAATCGCAACTCCATCGCAATTTGTGTTTTGTCATCAGCATGGGCCGACCCTATAGAATTAATA  
AATTTATGTACTAATTCAGTAGGCAATCAGTTCCAAACACAACAAGCTAGAACAACCGTTCAACGGCAATTTAG  
CGAAGTGTGGAAACCTGTCCCTCAAGTCACTGTTAGGTTTCTGACAGTGGTTTAAAGTGTATAGGTACAAT  
GCGGTACTAGATCCTCTAGTTACTGCTTTGTTGGGAGCTTTCGATACTAGAAATAGGATTATAGAAGTCGAAA  
ATCAGGCGAACCCGACAACCGCCGAAACGTTAGACGCTACTCGTAGAGTAGATGACGCAACGGTGGCTATAA  
GGAGCGCTATAAATAATTTAGTAGTAGAATTGGTCAAAGGAACAGGTTTGTACAATCAGAGCACATTTGAAA  
GTGCATCCGGTTTACAATGGTCCTCTGCACCTGCATCTTGA

MN882043

ATGGCATAACACAGACAGCTACCACATCCGCTTTGCTCGACACTGTCCGAGGTAACAATACCTTGGTCAATG  
ATCTTGCGAAGCGGCGTCTTTATGACACAGCGGTGACGAGTTCAACGCTCGTGATCGCAGGCCCAAAGTAA  
ATTTTTCCAAAGTAATAAGTGAGGAACAGACGCTTATTGCTACTAGGGCATATCCAGAATTCAGATAACCTTC  
TATAATACGCAGAACGCCGTGCATTGCTTGGCGGTGGACTACGATCCTTAGAACTGGAATATCTAATGATGC  
AGATCCCGTACGGATCACTCACATATGATATAGGTGGGAATTTTGCATCACATCTGTTCAAAGGACGGGCATA  
TGTTCACTGCTGTATGCCCAATCTTGATGTCCGCGACATAATGCGGCACGAAGGCCAGAAAGACAGTATAGAA  
TTATACCTTTCCAGGCTTGAGCGGGGCAACAAAGTTGTCCCAAATTTCCAAAAGGAAGCTTTTGACAGATACG  
CTGAAACGCCAGACGAAGTTGTCTGTACAGTACCTTCCAAACGTGTACGCACCAGCAGGTGGAAAACACAG  
GCAGGGTGTATGCTATTGCATTGCACAGTATATACGATATACCTGCTGATGAATTCGGAGCGGCACTTTTAAG  
GAAAAATGTCCATGTTTGTACGCCGCTTCCACTTTTCCGAGAATTTACTTCTCGAAGATTCACACGTCAACCT  
TGACGAAATCAACGCGTGTTTTTCGCGTGATGGAGACAAGCTGACTTTTTCTTTCGCATCTGAGAGCACTTTAA  
ATTATTGTCATAGTTATTCTAATATTTAAAATACGTGTGCAAACTTACTTCCCGGCATCTAATAGAGAGGTCT  
ACATGAAGGAGTTTTTAGTCACCAGGGTTAACACCTGGTTTTGTAAGTTTTCTAGGATTGATACTTTTTTATTAT  
ACAAGGGGGTAGCCCAAAAGGTGTAAATAGTGAGCAATTTTACAGCGCAATGGAAGATGCATGGCACTACA  
AAAAGACTCTTGCAATGTGTAACAGCGAGAGGATTCTTCTGAAGATTCCTCATCGGTCAATTACTGGTCCCA  
AAAATGAGAGATATGGTCATAGTTCTCTATTGACATATCTCTCGACACCAGTAAAAGGACCCGCAAAGAAG  
TCTTAGTGCAAAGGATTTTGTATTACAGTTTTAAATCACATTCGCACTTATCAAGCCAAGGCACCTACATACT  
CCAATGTTTTATCCTTTGTGAATCAATTCGTTCAAGGGTAATTATCAACGGAGTGACTGCTAGGTCTGAGTGG  
GATGTTGACAAATCTTTTTGCAATCCTTGTCATGACATTTTTCTTGCATACTAAGCTTGCCGTTTTAAAGAC  
GAATTGTTAATCAGCAAGTTTAGTTTGGGGCCAAAATCAGTAAGCCAGCATGTATGGGATGAGATTTCCCTGG  
CTTTTGAAACGCATTTCCATCGATCAAGGAGAGACTGCTAAATCGGAACTAATTAAGTGTCGGGAGACGC  
ATTAGAAATCAGGGTGCCTGATTTATATGTGACTTTTACGATAGATTAGTGACTGAGTACAAAACATCGGTG  
GATATGCCAGTGCTTGATATCAGAAAGAGAATGGAGGAGACTGAGGTTATGTACAATGCATTGTCTGAGCTA  
TCTGTGCTCAAGGAGTCGGACAAGTTCGACGTTGATGTTTTTCCCGGATGTGCCAGACTTTGGAGGTAGACC  
CAATGACTGCAGCAAAGGTTATAGTGGCAGTGATGAGCAACGAGAGCGGACTGACTCTTACATTGCAACAGC  
CAACTGAAGCAAATGTCGATTGGCACTTAAAGATTGAGAAAAAGCCTCTGAGGGTGCCTAGTGTTACTTC  
TAGAGATGTTGAAGAACCATCCATGAAGGGTTCAATGGCAAGAGGAGATTACAATTGGCCGGTCTGTCTGG  
AGACCAACCAGAGTCTTCTATACTCGGAACGAGGAAATAGAGTCATTAGAGCAATTCCACATGGCAACGGCT  
AGTTCGTTAATTCGGAACAGATGAGTTCGATTGTGTACACGGGCCCATTAAGTTGAGCAAATGAAAACT  
TTATTGATAGCCTGGTAGCATCACTCTCTGCTGCGGTGTGCAACCTAGTCAAGATCCTAAAGGATACAGCTGCT  
ATAGATCTCGAAACCCGTCAGAAGTTTGGAGTCTTAGATGTTGCGACCAAAGATGGTTAATTAACCTTTAG  
CCAAAAATCACGCATGGGGCGTTATTGAAACACATGCTAGGAAGTACCAGTTGCACTTTTGAGTATGATGA  
GCATGGAGTGGTAACTTGCGACAGTTGGAGAAGGGTGGCCGTGAGTTCTGAGTCAATGGTTTATTCTGATAT  
GGCAAAGCTCAGAACTGAGGAGATTATTAAGAGATGGTGAGCCTCATGTCAGCAGTGCTAAAGTCGTCT  
AGTTGACGGTGTCCCGGGTTGTGGAAAGACAAAAGAGATTCTCTCGAAAGTAAATTTTGAGGAAGATCTAAT  
CTTAGTACCGGGTAAGCAGGCTGCTGAAATGATAAAGAGGCGTGCTAATGCGTCAGGAATAATTCAAGCCAC  
AAGAGATAATGTTCTGACTGTTGATTCAATTTATAATGAATTACGGTAAAGGAACACGCTGTCAGTTCAAAGG  
TTATTTATCGACGAAGGTCTGATGTTGCACACTGGTTGTGTGAATTTCTTGTCTATGTCTCTGTGCGAAATT  
GCATATGTATATGGAGACACACAACAAATTCATACATCAACAGAGTATCCGGTTTTCCGTACCCTGCACATTT  
TGCAAAAAATAGAGGTTGATGAGGTGGAACTCGCAGAACTACGCTGCGTTGTCCAGCCGACATTACCACTAT  
CTTAACAGAAGGTACGAAGGACATGTCATGTGTACATCGTCGGTTAAAAAGTCAGTTTCTCAGGAAATGGTGA  
GCGGGGCCGCAATGATCAATCCTGTATCTAAGCCATTGAATGGGAAAGTTTGACTTTCACTCAGTCCGATAA  
AGAGGCGCTGCTTCTCGAGGATATACGGACGTCCATACAGTACATGAGGTACAAGGTGAGACATATGCAGA  
TGTGTGCTTGGTCAGATTGACTCCGACACCTGTATCTATCATCGCAGGAGATAGTCCGCACGTTCTCGTAGCTT  
TGTCAAGGCATACCCAAACATTGAAGTATTACACCGTAGTGATGGATCCTCTTGTAAGTATAATTAGGGATTTA

GAAAACTTAGTTCCTTACTTGTTAGATATGTATAAAGTAGATGCAGGGACCCAATAGCAATTACTGGTAGACT  
CCGTGTTTAAAGGTTCTAATCTTTTTGTTGCAGCACCAAAGACTGGAGATATCTCAGATATGCAATTTTACTAT  
GATAAGTGTCTCCCAGGTAATAGCACCATGTTAAATACTATGATGCTGTTACCATGAGGTTGACTGACATTTT  
TCTTAATGTCAAAGATTGCATATTGGATTTCTCTAAGTCTGTGGCTGCACCGAAGGATCCGATCAAACCACTGA  
TTCCAATGGTACGAACGGCGGCAGAAATGCCACGCCAGACTGGACTATTGGAAAATTTGGTGGCGATGATCA  
AAAGAACTTTAATTCACCGGAGTTATCAGGAATAATCGACATTGAGAATACTGCATCTTTGGTAGTAGATAA  
ATTTTTGATAGTTACTTGCTTAAAGAAAAAGAAAACCAAATAAAAATGTTTCTTTATTTGTAGAGAGTCTCT  
CAATAGATGGTTAGAGAAGCAGGAGCAAGTGACCATTGGTCAGCTTGCAGATTTTGATTTGTGGATCTTCTCT  
GCCGTTGATCAGTACAGGCATATGATTAAAGCGCAACCTAAGCAGAAGCTGGATACATCAATTCAAAGCGAAT  
ATCCGGCCTTGCAGACGATTGTGTATCATTGAAAAAGATCAACGCAATCTTCGGTCTTTGTTTCAGTGAGCTC  
ACAAGGCAAATGCTCGAAAGCATAGACTCAAGTAAGTTTTGTTCTTTACAAGGAAGACGCCAGCTCAAATCG  
AGGATTTCTTCGGAGATCTCGATAGCCATGTCCCTATGGATATCTTGAGTTGGATATTTGGAAGTATGACAAA  
TCTCAGAACGAGTTCCACTGTGCAGTAGAGTATGAAATATGGAGAAGACTTGGATTAGAAGATTTTCTGGGA  
GAAGTTTGGAACAAGGCCACAGAAAACTACTCTTAAAGATTACACAGCTGGTATTAACCGTGTATGTTATGGT  
ACCAGAGAAAGAGTGGGGACGTTACAACATTCATCGGTAATACGGTGATTATTGCTGCTTGTAGCTTCCAT  
GTTGCCCATGGAGAAAATAATCAAAGGTGCATTTTGGGAGATGACAGTTTACTATACTTCCAAAAGGTTGT  
GAGTTTCCCGACATACAGCATACAGCTAACCTTATGTGGAATTTGAGGCTAAGCTATTCAGAAAGCAGTATG  
GTTATTTCTGTGGAAGGTACGTGATACATCATGACAGAGGGTGTATTGTTTATTACGACCTTTGAAGTTGATT  
TCTAACTTGGTGCTAAACACATCAAGGATTGGGATCACTTAGAAGAGTTCAGAAGATCCCTTTGTGATGTTG  
CAATTTGTTGAACAACTGTGCGTATTACACGCAGTTGGACGACGCTGTGAGTGAGGTCCATAAAACCGCACC  
CCCGGTTGTTGTTTATAAAAGTTAGTTAAATATCTGTCCGATAAGGTTCTTTTAGAAGTTGTTTATAGA  
TGGCTCTTGTAAGGGTAAAGTCAATATTAATGAGTTCATAGACTTGTCAAAATCAGAAAAATTTCTCCGTCT  
ATGTTACACCTGTTAAGAGTGTGATGATCTCAAGGTTGATAAGATATTGGTTCATGAAGATGAATCTTTGTC  
CGAAGTCAATTTACTCAAAGGTGTAAACTCATTAAATGGTGGCTATGTACATCTTGCTGGTCTTGTAGTGACAG  
GTGAATGGAATTTGCCAGATAATTGTCGTGGTGGTGTGAGTGTCTGTTGGTCGATAAGAGAATGGAGAGAG  
CGGACGAGGCAACTCTTGCTTCACTATACCGCAGCGGCTAAGAAAAGGTTTCAGTTCAAAGTCGTTCCAAA  
TTACAACATCACTACCAAGGACGCAGAAAAGGCAGTTTGGCAAGTACTAGTTAATATTAGAAATGTTAAAT  
GCTGCGGTTACTGTCCGCTGTCATTAGAATTTGTGTCAGTGTGTATTGTTTATAAAATATTATAAACTCGG  
TTTGAGAGAGAAAATTACGAGCGTCACGGAAGGAGGGCCCATGGAAGTATCAGAAGAAGTTGTTGATGAGTT  
CATGGAAGAAGTCCCGATGTCTGTAAGGCTTGCAAAATTCGTTGGAAGACCGGGAAAAAGTTTAGTAGTAA  
AAGTGAGAATAATAGTGGTAATAATAGGCCGAAACCAGACAAAACCAAAGGAAGGAAAAGGGTTTAAAG  
TTAGGGTTGAGAAGGATAATTTAATTGATAATGAATTGGAGACTTACGTCGCCGATTGAGATTCGTATTAAT  
ATGTCTTACACAATCGCAACTCCATCGCAATTTGTGTTTTGTCATCAGCATGGGCCGACCCTATAGAATTAATA  
AATTTATGTACTAATTCAGTGGCAATCAGTTCCAAACACAACAAGCTAGAACAAACCGTTCAACGGCAATTTAG  
CGAAGTGTGGAAACCTGTCCCTCAAGTCACTGTTAGGTTTCTGACAGTGGTTTAAAGGTGTATAGGTACAAT  
GCGGTACTAGATCCTCTAGTTACTGCTTTGTTGGGAGCTTTCGATACTAGAAATAGGATTATAGAAGTCGAAA  
ATCAGGCGAACCCGACAACCGCCGAAACGTTAGACGCTACTCGTAGAGTAGATGACGCAACGGTGGCTATAA  
GGAGCGCTATAAATAATTTAGTAGTAGAATTGGTCAAAGGAACAGGTTTGTACAATCAGAGCACATTTGAAA  
GTGCATCCGGTTTACAATGGTCCTCTGCACCTGCATCTTGA

MN882045

ATGGCATACACACAGACAGCTACCACATCCGCTTTGCTCGACACTGTCCGAGGTAACAATACCTTGGTCAACG  
ATCTTGCGAAGCGGCGTCTTTATGACACAGCGGTGACGAGTTCAACGCTCGTGATCGCAGGCCCAAAGTAA  
ATTTTTCCAAAGTAATAAGTGAGGAACAGACGCTTATTGCTACTAGGGCATATCCTGAATTCAGATAACCTTC  
TATAATACGCAGAACGCCGTGCATTCGCTTGCCGGTGGACTACGATCCTTAGAACTGGAATATCTAATGATGC  
AGATCCCGTACGGATCACTCACATATGATATAGGTGGGAATTTTGCATCTCATCTGTTCAAAGGACGGGCATA



TGTTCACTGCTGTATGCCCAATCTTGATGTCCGCGACATAATGCGGCACGAAGGCCAGAAAGACAGTATAGAA  
TTATACCTTTCCAGGCTTGAGCGGGGCAACAAAGTTGTCCCAAATTTCCAAAAGGAAGCTTTTGACAGATACG  
CTGAAACGCCAGACGAAGTTGTCTGTACAGTACCTTCCAAACGTGTACGCACCAGCAGGTGGAAAACACAG  
GCAGGGTGTATGCTATTGCATTGCACAGTATATACGATATACCTGCTGATGAATTCGGAGCGGCACTTTTAAG  
GAAAAATGTCCATGTTTGTTACGCCGCCTTCCACTTTTCCGAGAATTTACTTCTCGAAGATTCACACGTCAACCT  
TGACGAAATCAACGCGTGTTTTTCGCGTGATGGAGACAAGCTGACTTTTTCTTTCGCATCTGAGAGCACTTTAA  
ATTATTGTCATAGTTATTCTAATATTTTAAAATACGTGTGCAAACTTACTTCCCGGCATCTAATAGAGAGGTCT  
ACATGAAGGAGTTTTTGGTCACCAGGGTTAACACCTGGTTTTGTAAGTTTTCTAGGATAGATACTTTTTTATTAT  
ACAAGGGGGTAGCCCACAAAGGTGTAAATAGTGAGCAATTTTACAGCGCAATGGAAGATGCATGGCACTACA  
AAAAGACTCTTGCAATGTGTAAACAGCGAGAGGATTCTTCTTGAAGATTCCTCATCGGTCAATTACTGGTTCCCA  
AAAATGAGAGATATGGTCATAGTTCTCTATTTCGACATATCTCTCGACACTAGTAAAAGGACCCGCAAAGAAG  
TCTTAGTGTCAAAGGATTTTGTATTACAGTTTTAAATCACATTGCACTTATCAAGCCAAGGCACTTACATACT  
CCAATGTTTTATCCTTTGTGCAATCAATTCGTTCAAGGGTAATTATCAACGGAGTGACTGCCAGGTCTGAGTGG  
GATGTTGACAAATCTTTTTGCAATCCTTGTCATGACATTTTTCTTGCATACTAAGCTTGCCGTTTTAAAAGAC  
GAATTGTTAATCAGCAAGTTTAGTTTGGGGCCAAAATCAGTAAGCCAGCATGTATGGGATGAGATTTCCCTGG  
CTTTTGAAACGCATTTCCATCGATCAAGGAGAGACTACTAAATCGGAACTAATTAAGTGTCGGGAGACGC  
ATTAGAAATCAGGGTGCCTGATTTATATGTGACTTTTACGATAGATTAGTGACTGAGTACAAAACATCGGTG  
GATATGCCAGTGCTTGATATCAGAAAGAGAATGGAGGAGACTGAGGTTATGTACAATGCATTGTCTGAGCTA  
TCTGTGCTTAAGGAGTCGGACAAGTTTCGACGTTGATGTTTTTCCCGGATGTGCCAGACTTTGGAGGTAGACC  
CAATGACTGCAGCAAAGGTTATTGTGGCAGTGATGAGCAACGAGAGCGGACTGACTCTTACATTGCAACAGC  
CAACTGAAGCAAATGTCGATTGGCACTTAAAGATTGAGAAAAAGCCTCTGAGGGTGCCTAGTGTTACTTC  
TAGAGATGTTGAAGAACCATCCATGAAGGGTTCATGGCAAGAGGAGAGTTACAATTGGCCGGTCTGTCTGG  
AGACCAACCAGAGTCTTCTATACTCGGAACGAGGAAATAGAGTCATTAGAGCAATTCACATGGCAACGGCT  
GGTTCGTTAATTCGGAAACAGATGAGTTGATTGTGTACACGGGCCCATTAAGTTTCAGCAAATGAAAACT  
TTATTGATAGCCTGGTAGCATCACTCTCTGCTGCGGTGTGCAACCTAGTCAAGATCCTAAAGGATACAGCTGCT  
ATAGATCTCGAAACCCGTCAGAAGTTTGGAGTCTTAGATGTTGCGACCAAAGATGGTTAATTAACCTTTAG  
CCAAGAATCACGCATGGGGCGTTATTGAAACACATGCTAGGAAGTACCACGTTGCACTTTTGGAGTATGATGA  
GCATGGAGTGGTAACTTGCGACAGTTGGAGAAGGGTGGCCGTGAGTTCTGAGTCAATGGTTTATTCTGATAT  
GGCAAAGCTCAGAACTGAGGAGATTATTAAGAGATGGTGAGCCTCATGTCAGCAGTGCTAAAGTCGTCT  
AGTTGACGGTGTCCCGGGTTGTGGAAAGACAAAAGAGATTCTCTCGAAAGTAAATTTGAGGAAGATCTAAT  
CTTAGTACCGGTAAGCAGGCTGCTGAAATGATAAAGAGGCGTGCTAATGCGTCAGGAATAATTCAAGCCAC  
AAGAGATAATGTTCTGACTGTTGATTCATTTATAATGAATTACGGTAAAGGAACACGCTGTCAGTTCAAAGG  
TTATTTATCGACGAAGGTCTGATGTTGCACACTGGTTGTGTGAATTTCTTGTCTATGTCTCTGTGCGAAATT  
GCATATGTTTATGGAGACACACAACAATTCATACATCAACAGAGTATCCGGTTTTCCGTACCCTGCGCATTT  
TGCAAAAATAGAGTTGATGAGGTGGAACTCGCAGAACTACGCTGCGTTGTCCAGCCGACATTACCCACTAT  
CTTAACAGAAGGTACGAAGGACATGTCATGTGTACATCGTCGGTTAAAAAGTCAGTTTCTCAGGAAATGGTGA  
GCGGGGCCGCAATGATCAATCCTGTATCTAAGCCATTGAATGGGAAAGTTTTGACTTTCACTCAGTCTGATAA  
AGAGGCGTGCTTTCTCGAGGATATACGGACGTCCATACAGTACATGAGGTACAAGGTGAGACATATGCAGA  
TGTGTGCTTGGTCAGATTGACTCCGACACCTGTATCTATCATCGCAGGAGATAGTCCGCACGTTCTCGTAGCTT  
TGTCAAGGCATACCCAAACATTGAAGTATTACACCGTAGTGATGGATCCTCTTGAAGTATAAATTAGGGATTTA  
GAAAACTTAGTTCTTACTTGTTAGATATGTATAAAGTAGATGCAGGGACCCAATAGCAATTACAGGTAGACT  
CCGTGTTTAAAGGTTCTAATCTTTTTGTTGCAGCACCAAGACTGGAGATATCTCAGATATGCAATTTTACTAT  
GATAAGTGTTCTCCAGGTAATAGCACCATGTTAAATAACTATGATGCTGTTACCATGAGGTTGACTGACATTC  
TCTTAATGTCAAAGATTGCATATTGGATTTCTCTAAGTCTGTGGCTGCACCGAAGGATCCGATCAAACCACTGA  
TTCCAATGGTACGAACGGCGGCAGAAATGCCACGCCAGACTGGACTATTGGAAAATTTGGTGGCGATGATCA  
AAAGAACTTTAATTCACCGGAGTTATCAGGAATAATCGACATTGAGAATACTGCATCTTTAGTAGTAGATAA  
ATTTTTGATAGTTACTTGCTTAAAGAAAAAAGAAAAACCAATAAAAAATGTTTCTTTATTTGTAGAGAGTCTCT  
CAATAGATGGTTAGAGAAGCAGGAGCAAGTGACCATTGGTCAGTTGCAGATTTTGATTTTGTGGATCTTCTCT

GCCGTTGATCAGTACAGGCATATGATTAAAGCGCAACCTAAGCAGAAGCTGGATACATCAATTCAAAGCGAAT  
ATCCGGCCTTGACAGACGATTGTGTATCATTGAAAAAGATCAACGCAATCTTCGGTCCTTTGTTTCAGTGAGCTC  
ACAAGGCAAATGCTCGAAAGCATAGACTCAAGTAAGTTTTTGTCTTTACAAGGAAGACGCCAGCTCAAATTG  
AGGATTTCTTCGGAGATCTCGATAGCCATGTCCCTATGGATATCTTGGAGTTGGATATTTTGAAGTATGACAAA  
TCTCAGAACGAGTTCCACTGTGACGTAGAGTATGAAATATGGAGAAGACTTGGATTAGAAGATTTTCTGGGA  
GAAGTTTGGAACAAGGCCACAGGAAAACTACTCTTAAAGATTACACAGCTGGTATTAACGTTGTTTATGGT  
ACCAGAGAAAGAGTGGGGACGTTACAACATTCATCGGTAATACGGTGATTATTGCTGCTTGTGTTAGCTTCCAT  
GTTGCCCATGGAGAAAATAATCAAAGGTGCATTTTGGGAGATGACAGTTTACTATACTTCCCAAAGGTTGT  
GAGTTTCTGACATACAGCATACAGCCAACCTTATGTGGAATTTGAGGCTAAGCTATTCAGAAAGCAGTATG  
GTTATTTCTGTGGAAGGTACGTGATACATCATGACAGAGGGTGTATTGTTTATTATGACCTTTGAAGTTGATT  
TCTAAACTTGGTGCTAAACACATCAAGGATTGGGATCACTTAGAAGAGTTCAGAAGATCCCTTTGTGATGTTG  
CAAATTCGTTGAACAACCTGTGCGTATTACACGCAGTTGGACGACGCTGTGAGTGAGGTCCATAAAACCGCACC  
CCCGGGTTCGTTTGTATATAAAAGTTAGTTAAATATCTGTCCGATAAGGTTCTTTTAGAAGTTTGTGTTATAGA  
TGGCTCTTGTTAAGGGTAAAGTCAATATTAATGAGTTCATAGACTTGTCAAATCAGAAAAATTTCTCCGTCT  
ATGTTACACCTGTTAAGAGTGTGATCTCCAAGGTTGATAAGATATTGGTTCATGAAGATGAATCTTTGTC  
CGAAGTCAATTTACTCAAAGGTGTAACCTCATTGATGGTGGCTATGTACATCTTGCTGGTCTGTGGTGACA  
GGTGAATGGAATTTGCCAGATAATTGTCGTGGTGGTGTGAGTGTCTGTTTGGTCGATAAAAGAATGGAGAGA  
GCGGACGAGGCAACTCTTGCTTCACTATACCGCAGCGGCTAAGAAAAGGTTTCAGTTCAAAGTCGTTCCAA  
ATTACAACATCACTACCAAGGACGCAGAAAAAGGCAGTTTGGCAAGTACTAGTTAATATTAGAAATGTTAAAT  
TGCTGCGGGTACTGTCCGCTGTCATTAGAATTTGTGTGAGTGTGATTGTTTATAAAAATATTATAAACTCG  
GTTTGAGAGAGAAAATTACGAGCGTCACGGATGGAGGGCCCATGGAATATCAGAAGAAGTTGTTGATGAG  
TTCATGGAAGAAGTCCCGATGTCTGTAAGGCTTGCAAAATTTGTTTGAAGACCGGGAAAAAGTTTAGTAGTA  
AAAGTGAGAATAATAGTGGTAATAATAGGCCGAAACCAAACAAAAACCAAAGGAAGGAAAAAGGTTTAAAA  
GTTAGGGTTGAGAAGGATAATTTAATTGATAATGAATTGGAGACTTACGTCGCCGATTGAGATTGATTTAAA  
TATGTCTTACACAATCGCAACTCCATCGCAATTTGTGTTTTTGTGATCAGCATGGGCCGACCCTATAGAATTAAT  
AAATTTATGTACTAATTCATAGGTAATCAATTCAAACACAACAAGCTAGAACAAACGTTCAACGGCAATTTA  
GCGAAGTGTGGAAACCTGTCCCTCAAGTCACTGTTAGGTTTCTGACAGTGGTTTTAAGGTGTATAGGTACAA  
TGCGGTACTAGATCCTCTAGTTACTGCTTTGTTAGGAGCTTTCGATACTAGAAATAGGATTATAGAAGTCGAAA  
ATCAGGCGAACCCGACAACCGCCGAAACGTTAGACGCTACTCGTAGAGTAGATGACGCAACGGTGGCTATAA  
GGAGCGCTATAAATAATTTAGTAGTAGAATTGGTCAAAGGAACAGGTTTGTACAATCAGAGCACATTTGAAA  
GTGCATCCGGTTTACAATGGTCCTCTGCACCTGCATCTTGA

MN882050

ATGGCATACACACAGACAGCTACCACATCCGCTTTGCTCGACACTGTCCGAGGTAACAATACCTTGGTCAACG  
ATCTTGCGAAGCGGCGTCTTTATGACACAGCGGTGACGAGTTCAACGCTCGTGATCGCAGGCCCAAAGTAA  
ATTTTTCAAAGTAATAAGTGAGGAACAGACGCTTATTGCTACTAGGGCATATCCAGAATTCAGATAACCTTT  
TATAATACGCAGAACGCCGTGCATTCGCTTGCCGGTGGACTACGATCCTTAGAACTGGAATATCTAATGATGC  
AGATCCCGTACGGATCACTCACATATGATATAGGTGGGAATTTTGCATCTCATCTGTTCAAAGGACGGGCATA  
TGTTCACTGCTGTATGCCAATCTTGATGTCCGCGACATAATGCGGCACGAAGGCCAGAAAGACAGTATAGAA  
TTATACCTTTCCAGGCTTGAGCGGGGCAACAAAGTTGTCCCAAATTTCAAAGGAAGCTTTTGACAGATACG  
CTGAAACGCCAGACGAAGTTGTCTGTACAGTACCTTCCAAACGTGTACGCACCAGCAGGTGGAAAACACAG  
GCAGGGTGTATGCTATTGCACTGCACAGTATATACGATATACCTGCTGATGAATTCGGAGCGGCACTTTTAAG  
GAAAAATGTCCATGTTTGTACGCCGCTTCCACTTTTCCGAGAATTTACTTCTCGAAGATTCACACGTCAAACCT  
TGACGAAATCAATGCGTGTGTTTTCGCGTGATGGAGACAAGCTGACTTTTTCTTTCGCATCTGAGAGCACTTTAA  
ATTATTGTCATAGTTATTCTAATATTTTAAAATACGTGTGCAAACTTACTTCCCGGCATCTAATAGAGAGGTCT  
ACATGAAGGAGTTTTTGGTCACCAGGGTTAACACCTGGTTTTGTAAGTTTTCTAGGATAGATACTTTTTTATTAT

ACAAGGGGGTAGCCCAAAAGGTGTAATAGTGAGCAATTTTACAGCGCAATGGAAGATGCATGGCACTACA  
AAAAGACTCTTGCAATGTGTAAACAGCGAGAGGATTCTTCTGAAGATTCTCATCGGTCAATTACTGGTCCCA  
AAAATGAGAGATATGGTCATAGTTCCTCTATTTCGACATATCTCTCGACACCAGTAAAAGGACCCGCAAAGAAG  
TCTTAGTGTCAAAGGATTTTGTATTACAGTTTTAAATCACATTCGCACTTATCAAGCCAAGGCATTACATACT  
CCAATGTTTTATCCTTTGTGAATCAATTCGTTCAAGGGTAATTATCAACGGAGTGACTGCCAGGTCTGAGTGG  
GATGTTGACAAATCTTTTGAATCCTTGTCATGACATTTTTCTGCATACTAAGCTTGCCGTTTTAAAGAC  
GAATTGTTAATCAGCAAGTTTAGTTGGGGCCAAAATCAGTAAGCCAGCATGTATGGGATGAGATTTCCCTGG  
CTTTTGAAACGCATTTCCATCGATCAAGGAGAGACTGCTAAATCGGAACTAATTAAGTGTGGGAGACGC  
ATTAGAAATCAGGGTGCCTGATTTATATGTGACTTTTCACGATAGATTAGTGACTGAGTACAAAACATCGGTG  
GATATGCCAGTGCTTGATATCAGAAAGAGAATGGAGGAGACTGAGGTTATGTACAATGCATTGTCTGAGCTA  
TCTGTGCTCAAGGAGTCGGACAAGTTCGACGTTGATGTTTTTCCCGATGTGCCAGACTTTGGAGGTAGACC  
CAATGACTGCAGCAAAGGTTATTGTGGCAGTGATGAGCAACGAGAGCGGACTGACTCTTACATTGCAACAGC  
CAACTGAAGCAAATGTCGCATTGGCACTTAAAGATTAGAAAAAGCCTCTGAGGGTGCACTAGTGGTTACTTC  
TAGAGATGTTGAAGAACCATCCATGAAGGGTTCAATGGCAAGAGGAGAGTTACAATTGGCCGGTCTGTCTGG  
AGACCAACCAGAGTCTTCTATACTCGGAACGAGGAAATAGAGTCATTAGAGCAATTCACATGGCAACGGCT  
AGTTCGTTAATTCGGAACAGATGAGTTCGATTGTGTACACGGGCCCATTAAGTTCAGCAAATGAAAACT  
TTATTGATAGCCTGGTAGCATCACTCTCTGCTGCGGTGTGCAACCTAGTCAAGATCCTAAAGGATACAGCTGCT  
ATAGATCTCGAAACCCGTCAGAAGTTTGGAGTCTTAGATGTTGCGACCAAAGATGGTTAATTAACCTTTAG  
CCAAGAATCACGCATGGGGCGTTATTGAAACACATGCTAGGAAGTACCACGTTGCATTTTTGGAGTATGATGA  
GCATGGAGTGGTAACTTGCGACAGTTGGAGAAGGGTGGCCGTGAGTTCTGAGTCAATGGTTTATTCTGATAT  
GGCAAAGCTCAGAACTGAGGAGATTATTAAGAGATGGTGAGCCTCATGTCAGCAGTGCTAAAGTCGTCT  
AGTTGACGGTGTCCCGGGTTGTGGAAAGACAAAAGAGATTCTCTCGAAAGTAAATTTGAGGAAGATCTAAT  
CTTAGTACCGGGTAAGCAGGCTGCTGAAATGATAAAGAGGCGTGCTAATGCGTCAGGAATAATTCAAGCCAC  
AAGAGATAATGTTCTGACTGTTGATTCAATTAATGAATTACGGTAAAGGAACACGCTGTCAGTTCAAAAGG  
TTATTTATCGACGAAGGTCTGATGTTGCACACTGGTTGTGTGAATTTCTGTTTCTATGTCTCTGTGCGAAAT  
GCATATGTTTATGGAGACACACAATAATTCATACATCAACAGAGTATCCGGTTTTCCGTACCCTGCACATTT  
TGCAAAAATAGAGGTTGATGAGGTGGAACTCGCAGAACTACGCTGCGTTGTCCAGCCGACATTACCCACTAT  
CTTAACAGAAGGTACGAAGGACATGTCATGTGTACATCGTCGGTTAAAAAGTCAGTTTCTCAGGAAATGGTGA  
GCGGGGCCGCAATGATCAATCCTGTATCTAAGCCATTGAATGGGAAAGTTTTGACTTTCAGTCTGATAA  
AGAGGCGCTGCTTCTCGAGGATATACGGACGTCCATACAGTACATGAGGTACAAGGTGAGACATATGCAGA  
TGTGTCGTTGGTCAGATTGACTCCGACACCTGTATCTATCATCGCAGGAGATAGTCCGCACGTTCTCGTAGCTT  
TGTCAAGGCATACCCAAACATTGAAGTATTACACCGTAGTGATGGATCCTCTTGTAAGTATAATTAGGGATTTA  
GAAAACTTAGTTCTTACTTGTTAGATATGTATAAAGTAGATGCAGGGACCCAATAGCAATTACAGGTAGACT  
CCGTGTTTAAAGGTTCTAATCTTTTTGTTGCAGCACCAAAGACTGGAGATATCTCAGATATGCAATTTTACTAT  
GATAAGTGTCTCCAGGTAATAGCACCATGTTAAATACTATGATGCTGTTACCATGAGGTTGACTGACATTTT  
TCTTAATGTCAAAGATTGCATATTGGATTTCTCTAAGTCTGTGGCTGCACCGAAGGATCCGATCAAACCACTGA  
TTCCAATGGTACGAACGGCGGCAGAAAAGCCACGCCAGACTGGACTATTGGAAAATTTGGTGGCGATGATCA  
AAAGAACTTTAATTCACCGGAGTTATCAGGAATAATCGACATTGAGAATACTGCATCTTAGTAGTAGATAA  
ATTTTTGATAGTTACTTGCTTAAAGAAAAAGAAAACCAAATAAAAAATGTTTCTTTATTTGTAGAGAGTCTCT  
CAATAGATGGTTAGAGAAGCAGGAGCAAGTGACCATTGGTCAGCTTGAGATTTTGATTTGTGGATCTTCCT  
GCCGTTGATCAGTACAGGCATATGATTAAGCGCAACCTAAGCAGAAGCTGGATACATCAATTCAAAGCGAAT  
ATCCGGCCTTGACAGACGATTGTGTATCATTCGAAAAAGATCAACGCAATCTTCGGTCCTTTGTTCAAGTACGCTC  
ACAAGGCAAATGCTCGAAAGCATAGACTCAAGTAAGTTTTGTTCTTTACAAGGAAGGCGCCAGCTCAAATTG  
AGGATTTCTTCGGAGATCTCGATAGCCATGTCCCTATGGATATCTTGAGTTGGATATTTGGAAGTATGACAAA  
TCTCAGAACGAGTTCCACTGTGCAGTAGAGTATGAAATATGGAGAAGACTTGATTAGAAGATTTTCTGGGA  
GAAGTTTGGAACAAGGCCACAGAAAACTACTCTTAAAGATTACACAGCTGGTATTAACGTTGTTTATGGT  
ACCAGAGAAAGAGTGGGGACGTTACAACATTATCGGTAATACGGTGATTATTGCTGCTTGTTTAGCATCCAT  
GTTGCCCATGGAGAAAATAATCAAAGGTGCATTTTTCGGAGATGACAGTTTACTATACTTCCAAAAGGTTGT

GAGTTTCCTGACATACAGCATACAGCCAACCTTATGTGGAATTTGAGGCTAAGCTATTCAGAAAAGCAGTATG  
GTTATTTCTGTGGAAGGTACGTGATACATCACGACAGAGGGTGTATTGTTTATTATGACCCTTTGAAGTTGATT  
TCTAAACTTGGTGCTAAACACATCAAGGATTGGGATCACTTAGAAGAGTTCAGAAGATCCCTTTGTGATGTTG  
CAAATTCGTTGAACAACTGTGCGTATTACACGCAGTTGGACGACGCTGTGAGTGAGGTCCATAAAACCGCACC  
CCCGGGTTCGTTTGTATATAAAAGTTTGTAAATATCTGTCCGATAAGGTTCTTTTTAGAAAGTTGTTTATAGA  
TGGCTCTTGTTAAGGGTAAAGTCAATATTAATGAGTTCATAGACTTGTCAAATCAGAAAAATTTCTTCCGTCT  
ATGTTACACCTGTTAAGAGTGTGATCTCCAAGGTTGATAAGATATTGGTTCATGAAGATGAATCTTTGTC  
CGAAGTCAATTTACTCAAAGGTGTAAACTCATTGATGGTGGCTATGTACATCTTGCTGGTCTTGTTGGTGACA  
GGTGAATGGAATTTGCCAGATAATTGTCGTGGTGGTGTGAGTGTCTGTTTGGTCGATAAGAGAATGGAGAGA  
GCGGACGAGGCAACTCTTGCTTCATACTATACCGCAGCGGCTAAGAAAAGGTTTCAGTTCAAAGTCGTTCCAA  
ATTACAACATCACTACCAAGGACGCAGAAAAGGCAGTTTGGCAAGTACTAGTTAATATTAGAAATGTTAAAT  
TGCTGCGGGTACTGTCCGCTGTCATTAGAATTTGTGTGAGTGTGATTGTTTATAAAAATATTATAAACTCG  
GTTTGAGAGAGAAAATTACGAGCGTCACGGATGGAGGGCCTATGGAATATCAGAAGAAGTTGTTGATGAGT  
TCATGGAAGAAGTCCCGATGTCTGTAAGGCTTGCAAAATTTGTTTCGAAGACCGGAAAAAAGTTTAGTAGTAA  
AAGTGAGAATAATAGTGGTAATAATAGGCCGAAACCAACAAAAACCAAAGGAAGGAAAAGGGTTTAAAG  
TTAGGGTTGAGAAGGATAATTTAATTGATAATGAATTGGAGACTTACGTCGCCGATTGAGATTGCTATTAAAT  
ATGTCTTACACAATCGCAACTCCATCGCAATTTGTGTTTTGTGTCATCAGCATGGGCCGACCCTATAGAATTAATA  
AATTTATGTACTAATTCAGTAGGTAATCAGTTCCAAACACAACAAGCTAGAACAAACCGTTCAACGGCAATTTAG  
CGAAGTGTGGAAACCTGTCCCTCAAGTCACTGTTAGGTTTCTGACAGTGGTTTTAAGGTGTATAGGTACAAT  
GCGGTACTAGATCCTCTAGTTACTGCTTTGTTAGGAGCTTCGATACTAGAAATAGGATTATAGAAGTCGAAA  
ATCAGGCGAACCCGACAACCGCCGAAACGTTAGACGCTACTCGTAGAGTAGATGACGCAACGGTGGCTATAA  
GGAGCGCTATAAATAATTTAGTAGTAGAATTGGTCAAAGGAACAGGTTTGTACAATCAGAGCACATTTGAAA  
GTGCATCTGGTTACAATGGTCCTCTGCACCTGCATCTTGA

MN882053

ATGGCATAACACAGACAGCTACCACATCCGCTTTGCTCGACACTGTCCGAGGTAACAATACCTTGGTCAACG  
ATCTTGCGAAGCGGCGTCTTTATGACACAGCGGTCGACGAGTTCAACGCTCGTGATCGCAGGCCCAAAGTAA  
ATTTTCCAAAGTAATAAGTGAGGAACAGACGCTTATTGCTACTAGGGCATATCCTGAATTCCAGATAACCTTC  
TATAATACGCAGAACGCCGTGCATTGCTTCCCGGTGGACTACGATCCTTAGAACTGGAATATCTAATGATGC  
AGATCCCGTACGGATCACTTACATATGATATAGGTGGGAATTTGCATCTCATCTGTTCAAAGGACGGGCATA  
TGTTCACTGCTGTATGCCAATCTTGATGTCCGCGACATAATGCGGCACGAAGGCCAGAAAGACAGTATAGAA  
TTATACCTTTCCAGGCTTGAGCGGGGCAACAAAGTTGTCCCAAATTTCCAAAAGGAAGCTTTTGACAGATACG  
CTGAAACGCCAGACGAAGTTGTCTGTACAGTACCTTCCAAACGTGTACGCACCAGCAGGTGGAAAACACAG  
GCAGGGTGTATGCTATTGCATTGCACAGTATATACGATATACCTGCTGATGAATTCGGAGCGGCACTTTTAAG  
GAAAAATGTCCATGTTTGTACGCCGCTTCCACTTTTCCGAGAATTTACTTCTCGAAGATTCACACGTCAACCT  
TGACGAAATCAACGCGTGTTTTTCGCGTGATGGAGACAAGCTGACTTTTTCTTTTCGCATCTGAGAGCACTTTAA  
ATTATTGTCATAGTTATTCTAATATTTTAAAATACGTGTGCAAACTTACTTCCCGGCATCTAATAGAGAGGTCT  
ACATGAAGGAGTTTTTGGTCACCAGGGTTAACACCTGGTTTTGTAAGTTTTCTAGGATAGATACTTTTTTATTAT  
ACAAGGGGGTAGCCCAACAAAGGTGTAAATAGTGAGCAATTTTACAGCGCAATGGAAGATGCATGGCACTACA  
AAAAGACTCTTGCAATGTGTAACAGCGAGAGGATTCTTCTGAAGATTCCTCATCGGTCAATTACTGGTCCCA  
AAAATGAGAGATATGGTCATAGTTCTCTATTGACATATCTCTCGACACTAGTAAAAGGACCCGCAAAGAAG  
TCTTAGTGTCAAAGGATTTTGTATTACAGTTTTTAAATCACATTCGCACTTATCAAGCCAAGGCACTTACATACT  
CCAATGTTTTATCCTTTGTGCAATCAATTCGTTCAAGGGTAATTATCAACGGAGTGACTGCCAGGTCTGAGTGG  
GATGTTGACAAATCTTTTTGCAATCCTTGTCATGACATTTTTCTTGCTACTAAGCTTGCCGTTTTAAAAGAC  
GAATTGTTAATCAGCAAGTTTAGTTGGGGCCAAAATCAGTAAGCCAGCATGTATGGGATGAGATTTCCCTGG  
CTTTTGAAACGCATTTCCATCGATCAAGGAGAGACTGCTAAATCGGAACTAATTAAGTGTCGGGAGACGC

ATTAGAAATCAGGGTGCCTGATTTATATGTGACTTTTCACGATAGATTAGTGACTGAGTACAAAACATCGGTG  
GATATGCCAGTGCTTGATATCAGAAAGAGAATGGAGGAGACTGAGGTTATGTACAATGCATTGTCTGAGCTA  
TCTGTGCTCAAGGAGTCGGACAAGTTCGACGTTGATGTTTTTCCCGGATGTGCCAGACTTTGGAGGTAGACC  
CAATGACTGCAGCAAAGGTTATTGTGGCAGTGATGAGCAACGAGAGCGGACTGACTCTTACATTCGAACAGC  
CAACTGAAGCAAATGTCGCATTGGCACTTAAAGATTAGAAAAAGCCTCTGAGGGTGCAGTGTGTTACTTC  
TAGAGATGTTGAAGAACCATCCATGAAGGGTTCATGGCAAGAGGAGAGTTACAATTGGCCGGTCTGTCTGG  
AGACCAACCAGAGTCTTCTATACTCGGAACGAGGAAATAGAGTCATTAGAGCAATTCCACATGGCAACGGCT  
GGTTCGTTAATTCGGAACAGATGAGTTCGATTGTGTACACGGGCCCCATTAAAGTTCAGCAAATGAAAACT  
TTATTGATAGCCTGGTAGCATCACTCTCTGCTGCGGTGTGCAACCTAGTCAAGATCCTAAAGGATACAGCTGCT  
ATAGATCTCGAAACCCGTCAGAAGTTTGGAGTCTTAGATGTTGCGACCAAAGATGGTTAATTAACCTTTAG  
CCAAGAATCACGCATGGGGCGTTATTGAAACACATGCTAGGAAGTACCAGTTGCAGTTTTGGAGTATGATGA  
GCATGGAGTGGTAACTTGCGACAGTTGGAGAAGGGTGGCCGTGAGTTCTGAGTCAATGGTTTATTCTGATAT  
GGCAAAGCTCAGAACTGAGGAGATTATTAAGAGATGGTGAGCCTCATGTCAGCAGTGCTAAAGTCGTCT  
AGTTGACGGTGTCCCGGGTGTGGAAAGACAAAAGAGATTCTCTCGAAAGTAAATTTGAGGAAGATCTAAT  
CTTAGTACCGGTAAAGCAGGCTGCTGAAATGATAAAGAGGCGTGCTAATGCGTCAGGAATAATTCAAGCCAC  
AAGAGATAATGTTCTGACTGTTGATTCAATTTATAATGAATTACGGTAAAGGAACACGCTGTCAGTTCAAAGG  
TTATTTATCGACGAAGGTCTGATGTTGCACACTGGTTGTGTGAATTTCTTGTCTATGTCTCTGTGCGAAAT  
GCATATGTTTATGGAGACACACAACAAATTCATACATCAACAGAGTATCCGGTTTTCCGTACCCTGCACATTT  
TGCAAAAATAGAGGTTGATGAGGTGGAACTCGCAGAACTACGCTGCGTTGTCCAGCCGACATTACCCACTAT  
CTTAACAGAAGGTACGAAGGACATGTCATGTGTACATCGTCGGTTAAAAAGTCAGTTTCTCAGGAATGGTGA  
GCGGGGCCGCAATGATCAATCCTGTATCTAAGCCATTGAATGGGAAGTTTTGACTTTCAGTCTGATAA  
AGAGGCGCTGCTTCTCGAGGATATACGGACGTCCATACAGTACATGAGGTACAAGGTGAGACATATGCAGA  
TGTGTGCTTGGTCAGATTGACTCCGACACCTGTATCTATCATCGCAGGAGATAGTCCGCACGTTCTCGTAGCTT  
TGTCAAGGCATACCCAAACATTGAAGTATTACACCGTAGTGATGGATCCTCTTGTAAGTATAATTAGGGATTTA  
GAAAACTTAGTTCTTACTTGTTAGATATGTATAAAGTAGATGCAGGGACCCAATAGCAATTACAGGTAGACT  
CCGTGTTTAAAGGTTCTAATCTTTTTGTTGCAGCACAAAGACTGGAGATATCTCAGATATGCAATTTTACTAT  
GATAAGTGTCTCCAGGTAATAGCACCATGTTAAATAACTATGATGCTGTTACCATGAGGTTGACTGACATTTT  
TCTTAATGTCAAAGATTGCATATTGGATTTCTCTAAGTCTGTGGCTGCACCGAAGGATCCGATCAAACCACTGA  
TTCCAATGGTACGAACGGCGGCAGAAATGCCACGCCAGACTGGACTATTGGAAAATTTGGTGGCGATGATCA  
AAAGAACTTTAATTCACCGGAGTTATCAGGAATAATCGACATTGAGAATACTGCATCTTTAGTAGTAGATAA  
ATTTTTGATAGTTACTTGCTTAAAGAAAAAGAAAACCAAATAAAAAATGTTTCTTTATTTGTAGAGAGTCTCT  
CAATAGATGGTTAGAGAAGCAGGAGCAAGTGACCATTGGTCAGCTTGCAGATTTTGATTTGTGGATCTTCT  
GCCGTTGATCAGTACAGGCATATGATTAAAGCGCAACCTAAGCAGAAGCTGGATACATCAATTCAAAGCGAAT  
ATCCGGCCTTGCAGACGATTGTGTATCATTGAAAAAGATCAACGCAATCTTCGGTCTTTGTTTCAGTGAGCTC  
ACAAGGCAAATGCTCGAAAGCATAGACTCAAGTAAGTTTTGTTCTTTACAAGGAAGACGCCAGCTCAAATTG  
AGGATTTCTTCGGAGATCTCGATAGCCATGTCCCTATGGATATCTTGAGTTGGATATTTGCAAGTATGACAAA  
TCTCAGAACGAGTTCCACTGTGCAGTAGAGTATGAAATATGGAGAAGACTTGGATTAGAAGATTTTCTGGGA  
GAAGTTTGGAACAAGGCCACAGGAAAATACTCTTAAAGATTACACAGCTGGTATTAACCGTGTATGGT  
ACCAGAGAAAGAGTGGGGACGTTACAACATTCATCGGTAATACGGTGATTATTGCTGCTTGTATAGCTTCCAT  
GTTGCCCATGGAGAAAATAATCAAAGGTGCATTTTGCGGAGATGACAGTTTACTATACTTCCAAAAGGTTGT  
GAGTTTCTGACATACAGCATAACGCCAACCCTATGTGGAATTTGAGGCTAAGCTATTCAGAAAGCAGTATG  
GTTATTTCTGTGGAAGGTACGTGATACATCATGACAGAGGGTGTATTGTTTATTATGACCTTTGAAGTTGATT  
TCTAACTTGGTGCTAAACACATCAAGGATTGGGATCACTTAGAAGAGTTCAGAAGATCCCTTTGTGATGTTG  
CAAATTCGTTGAACAACTGTGCGTATTACACGCAGTTGGACGACGCTGTGAGTGAGGTCCATAAAACCGCAC  
CCCGGTTCTGTTGTATATAAAAGTTAGTTAAATATCTGTCCGATAAGGTTCTTTTAGAAGTTTGTATAGA  
TGGCTCTTGTAAAGGGTAAAGTCAATATTAATGAGTTCATAGACTTGTCAAATCAGAAAAATTTCTTCCGTCT  
ATGTTACACCTGTTAAGAGTGTGATGATCTCAAGGTTGATAAGATATTGGTTCATGAAGATGAATCTTTGTC  
CGAAGTCAATTTACTCAAAGGTGTAACCTCATTGATGGTGGCTATGTACATCTTGCTGGTCTTGTGGTGACA

GGTGAATGGAATTTGCCAGATAATTGTCGTGGTGGTGTCAAGTGTCTGTTTGGTCGATAAAAGAATGGAGAGA  
GCGGACGAGGCAACTCTTGCTTCATACTATACCGCAGCGGCTAAGAAAAGGTTTCAGTTCAAAGTCGTTCCAA  
ATTACAACATCACTACCAAGGACGCAGAAAAGGCAGTTTGGCAAGTACTAGTTAATATTAGAAATGTTAAAT  
TGCTGCGGGTACTGTCCGCTGTCATTAGAATTTGTGTCAAGTGTGTATTGTTTATAAAAATATTATAAACTCG  
GTTTGAGAGAGAAAATTACGAGCGTCACGGATGGAGGGCCCATGGAATATCAGAAGAAGTTGTTGATGAG  
TTCATGGAAGAAGTCCCGATGTCTGTAAGGCTTGCAAAATTTGTTTGAAGACCGGGAAAAAGTTTAGTAGTA  
AAAGTGAGAATAATAGTGGTAATAATAGGCCGAAACCAACAAAAACCAAAGGAAGGAAAAGGGTTTAAAA  
GTTAGGGTTGAGAAGGATAATTTAATTGATAATGAATTGGAGACTTACGTCGCCGATTGAGATTGCTATTAAA  
TATGTCTTACACAATCGCAACTCCATCGCAATTTGTGTTTTTGTATCAGCATGGGCCGACCCTATAGAATTAAT  
AAATTTATGTACTAATTCAGTGGTAATCAATTCAAACACAACAAGCTAGAACAACCGTTCAACGGCAATTTA  
GCGAAGTGTGGAACCTGTCCCTCAAGTCACTGTTAGGTTTCTGACAGTGGTTTTAAGGTGTATAGGTACAA  
TGCGGTACTAGATCCTCTAGTTACTGCTTTGTTAGGAGCTTTGATACTAGAAATAGGATTATAGAAGTCGAAA  
ATCAGGCGAACCCGACAACCGCCGAAACGTTAGACGCTACTCGTAGAGTAGATGACGCAACGGTGGCTATAA  
GGAGCGCTATAAATAATTTAGTAGTAGAATTGGTCAAAGGAACAGGTTTGTACAATCAGAGCACATTTGAAA  
GTGCATCCGTTTACAATGGTCCTCTGCACCTGCATCTTGA

MN882058

ATGGCATACACACAGACAGCTACCACATCCGCTTTGCTCGACACTGTCCGAGGTAACAATACCTTGGTCAACG  
ATCTTGCGAAGCGGCGTCTTTATGACACAGCGGTGCGAGGTTCAACGCTCGTGATCGCAGGCCCAAAGTAA  
ATTTTTCCAAAGTAATAAGTGAGGAACAGACGCTTATTGCTACTAGGGCATATCTGAATTCAGATAACCTTC  
TATAATACGCAGAACGCCGTGCATTGCTTGCCGGTGGACTACGATCCTTAGAACTGGAATATCTAATGATGC  
AGATCCCGTACGGATCACTCACATATGATATAGGTGGGAATTTTGCATCTCATCTGTTCAAAGGACGGGCATA  
TGTTCACTGCTGTATGCCAATCTTGATGTCCGCGACATAATGCGGCACGAAGGCCAGAAAGACAGTATAGAA  
TTATACCTTTCCAGGCTTGAGCGGGGCAACAAAGTTGTCCCAAATTTCCAAAAGGAAGCTTTTGACAGATACG  
CTGAAACGCCAGACGAAGTTGTCTGTACAGTACCTTCCAAACGTGTACGCACCAGCAGGTGGAAAACACAG  
GCAGGGTGTATGCTATTGCATTGCACAGTATATACGATATACCTGCTGATGAATTCGGAGCGGCACTTTTGAG  
GAAAAATGTCCATGTTTGTACGCCGCCTTCCACTTTTCCGAGAATTTACTTCTCGAAGATTCACACGTCAACCT  
TGACGAAATCAACGCGTGTTTTTCGCGTGATGGAGACAAGCTGACTTTTTCTTTCGCATCTGAGAGCACTTTAA  
ATTATTGTCATAGTTATTCTAATATTTTAAAATACGTGTGCAAACTTACTTCCCGGCATCTAATAGAGAGGTCT  
ACATGAAGGAGTTTTTGGTCACCAGGGTTAACACCTGGTTTTGTAAGTTTTCTAGGATAGATACTTTTTTATTAT  
ACAAGGGGGTAGCCCACAAAGGTGTAAATAGTGAGCAATTTTACAGCGCAATGGAAGATGCATGGCACTACA  
AAAAGACTCTTGCAATGTGTAAACAGCGAGAGGATTCTTCTGAAGATTCTCATCGGTCAATTACTGGTTCCCA  
AAAATGAGAGATATGGTCATAGTTCTCTATTGACATATCTCTGACACTAGTAAAAGGACCCGCAAAGAAG  
TCTTAGTGTCAAAGGATTTTGTATTACAGTTTTTAATCACATTGCACTTATCAAGCCAAGGCACTTACATACT  
CCAATGTTTTATCCTTTGTGAATCAATTCGTTCAAGGGTAATTATCAACGGAGTGACTGCCAGGTCTGAGTGG  
GATGTTGACAAATCTTTTTGCAATCCTTGTCATGACATTTTTCTTGCACTAAGCTTGCCGTTTTAAAAGAC  
GAATTGTTAATCAGCAAGTTTAGTTTGGGGCCAAAATCAGTAAGCCAGCATGTATGGGATGAGATTTCCCTGG  
CTTTTGAAACGCATTTCCATCGATCAAGGAGAGACTGCTAAATCGGAACTAATTAAGTGTCGGGAGACGC  
ATTAGAAATCAGGGTGCCTGATTTATATGTGACTTTTACGATAGATTAGTGACTGAGTACAAAACATCGGTG  
GATATGCCAGTGCTTGATATCAGAAAGAGAATGGAGGAGACTGAGGTTATGTACAATGCATTGTCTGAGCTA  
TCTGTGCTCAAGGAGTCGGACAAGTTGACGTTGATGTTTTTCCCGGATGTGCCAGACTTTGGAGGTAGACC  
CAATGACTGCAGCAAAGGTTATTGTGGCAGTGATGAGCAACGAGAGCGGACTGACTCTTACATTGAAACAGC  
CAACTGAAGCAAATGTGCAATTGGCACTTAAAGATTGAGAAAAAGCCTCTGAGGGTGCACTAGTGGTTACTTC  
TAGAGATGTTGAAGAACCATCCATGAAGGGTTCAATGGCAAGAGGAGAGTTACAATTGGCCGGTCTGTCTGG  
AGACCAACCAGAGTCTTCTATACTCGGAACGAGGAAATAGAGTCATTAGAGCAATTCCACATGGCAACGGCT  
GGTTCGTTAATTCGGAAACAGATGAGTTCGATTGTGTACACGGGCCCCATTAAAGTTCAGCAAATGAAAACT

TTATTGATAGCCTGGTAGCATCACTCTCTGCTGCGGTGTGCGAACCTAGTCAAGATCCTAAAGGATACAGCTGCT  
ATAGATCTCGAAACCCGTCAGAAGTTTGGAGTCTTAGATGTTGCGACCAAAGATGGTTAATTAACCTTTAG  
CCAAGAATCACGCATGGGGCGTTATTGAAACACATGCTAGGAAGTACCACGTTGCACTTTTGGAGTATGATGA  
GCATGGAGTGGTAACTTGCGACAGTTGGAGAAGGGTGGCCGTGAGTTCTGAGTCAATGGTTTATTCTGATAT  
GGCAAAGCTCAGAACACTGAGGAGATTATTAAGAGATGGTGAGCCTCATGTCAGCAGTGCTAAAGTCGTCT  
AGTTGACGGTGTCCCGGTTGTGGAAAAGACAAAAGAGATTCTCTCGAAAGTAAATTTTGGAGGAAGATCTAAT  
CTTAGTACCGGGTAAGCAGGCTGCTGAAATGATAAAGAGGGCTGCTAATGCGTCAGGAATAATTCAAGCCAC  
AAGAGATAATGTTTCGTAAGTTCATTATAATGAATTACGGTAAAGGAACACGCTGTCAGTTCAAAGG  
TTATTTATCGACGAAGGTCTGATGTTGCACACTGGTTGTGTGAATTTCTTGTCTATGTCTCTGTGCGAAATT  
GCATATGTTTATGGAGACACACAACAAATTCCATACATCAACAGAGTATCCGTTTTCCGTACCCTGCACATTT  
TGCCAAAATAGAGTTGATGAGGTGGAACTCGCAGAACTACGCTGCGTTGTCCAGCCGACATTACCCACTAT  
CTTAACAGAAGGTACGAAGGACATGTCATGTGTACATCGTCGGTTAAAAAGTCAGTTTCTCAGGAAATGGTGA  
GCGGGGCCGCAATGATCAATCCTGTATCTAAGCCATTGAATGGGAAAGTTTGACTTTCACTCAGTCTGATAA  
AGAGGCGCTGCTTCTCGAGGATATACGGACGTCCATACAGTACATGAGGTACAAGGTGAGACATATGCAGA  
TGTGTCGTTGGTCAGATTGACTCCGACACCTGTATCTATCATCGCAGGAGATAGTCCGCACGTTCTCGTAGCTT  
TGTCAGGCATACCCAAACATTGAAGTATTACACCGTAGTGATGGATCCTCTTGAAGTATAATTAGGGATTTA  
GAAAACTTAGTTCTTACTTGTTAGATATGTATAAAGTAGATGCAGGGACCCAATAGCAATTACAGGTAGACT  
CCGTGTTTAAAGTTCTAATCTTTTGTGTCAGCACCAAGACTGGAGATATCTCAGATATGCAATTTTACTAT  
GATAAGTGTCTCCAGGTAATAGCACCATGTTAAATAACTATGATGCTGTTACCATGAGGTTGACTGACATTT  
TCTTAATGTCAAAGATTGCATATTGGATTTCTCTAAGTCTGTGGCTGCACCGAAGGATCCGATCAAACCACTGA  
TTCCAATGGTACGAACGGCGGCAGAAATGCCACGCCAGACTGGACTATTGGAAAATTTGGTGGCGATGATCA  
AAAGAACTTTAATTCACCGGAGTTATCAGGAATAATCGACATTGAGAATACTGCATCTTTAGTAGTAGATAA  
ATTTTTGATAGTTACTTGCTTAAAGAAAAAGAAAAACCAATAAAAAATGTTTCTTTATTTGTAGAGAGTCTCT  
CAATAGATGGTTAGAGAAGCAGGAGCAAGTGACCATTGGTCAGCTTGCAGATTTTGATTTTGTGGATCTTCT  
GCCGTTGATCAGTACAGGCATATGATTAAAGCGCAACCTAAGCAGAAGCTGGATACATCAATTCAAAGCGAAT  
ATCCGGCCTTGACAGCAGATTGTGTATCATTCGAAAAAGATCAACGCAATCTTCGGTCCTTTGTTCAAGTGTG  
ACAAGGCAAATGCTCGAAAGCATAGACTCAAGTAAGTTTTTGTCTTTACAAGGAAGACGCCAGCTCAAATTG  
AGGATTTCTTCGGAGATCTCGATAGCCATGTCCCTATGGATATCTTGGAGTTGGATATTTTGAAGTATGACAAA  
TCTCAGAACGAGTTCCACTGTGCAGTAGAGTATGAAATATGGAGAAGACTTGGATTAGAAGATTTTCTGGGA  
GAAGTTTGAAACAAGGCCACAGGAAAACCTACTCTTAAAGATTACACAGCTGGTATTAAACGTGTTTATGGT  
ACCAGAGAAAGAGTGGGGACGTTACAACATTCATCGGTAATACGGTGATTATTGCTGCTTGTGTTAGCTTCCAT  
GTTGCCCATGGAGAAAATAATCAAAGGTGCATTTTTCGGAGATGACAGTTTACTATACTTCCCAAAGGTTGT  
GAGTTTCTGACATACAGCATACAGCCAACCTTATGTGGAATTTTCGAGGCTAAGCTATTCAGAAAAGCAGTATG  
GTTATTTCTGTGGAAGGTACGTGATACATCATGACAGAGGGTGTATTGTTTATTATGACCTTTGAAGTTGATT  
TCTAACTTGGTGCTAAACACATCAAGGATTGGGATCACTTAGAAGAGTTCAGAAGATCCCTTTGTGATGTTG  
CAAATTCGTTGAACAACCTGTGCGTATTACACGCAGTTGGACGACGCTGTGAGTGAGGTCCATAAAACCGCACCC  
CCCGGTTTCGTTTGTATATAAAAGTTTAGTTAAATATCTGTCCGATAAGGTTCTTTTGAAGTTTGTGTTATAGA  
TGGCTCTTGTTAAGGGTAAAGTCAATATTAATGAGTTCATAGACTTGTCAAATCAGAAAAATTTCTTCCGTCT  
ATGTTACACCTGTTAAGAGTGTGATGATCTCCAAGGTTGATAAGATATTGGTTCATGAAGATGAATCTTTGTC  
CGAAGTCAATTTACTCAAAGGTGTAACCTCATTGATGGTGGCTATGTACATCTTGCTGGTCTTGTGGTGACA  
GGTGAATGGAATTTGCCAGATAATTGTCGTGGTGGTGTGAGTGTCTGTTTGGTCGATAAAAGAATGGAGAGA  
GCGGACGAGGCAACTCTTGCTTCATACTATACCGCAGCGGCTAAGAAAAGGTTTCAGTTCAAAGTCGTTCCAA  
ATTACAACATCACTACCAAGGACGCAAAAAAGGCAGTTTGGCAAGTACTAGTTAATATTAGAAATGTTAAAT  
TGCTGCGGGTTACTGTCCGCTGTCATTAGAATTTGTGTGAGTGTGATTGTTTATAAAAAATATTATAAACTCG  
GTTTGAGAGAGAAAATTACGAGCGTAACGGATGGAGGGCCCATGGAAGTATCAGAAGAAGTTGTTGATGAG  
TTCATGGAAGAAGTCCCGATGTCTGTAAGGCTTGCAAAATTTGTTTGAAGACCGGGAAAAAGTTTAGTAGTA  
AAAGTGAGAATAATAGTGGTAATAATAGGCCGAAACCAACAAAAACCAAGGAAGGAAAAAGGGTTTAAAA  
GTTAGGGTTGAGAAGGATAATTTAATTGATAATGAATTGGAGACTTACGTCGCCGATTGAGATTCGTATTA

TATGTCTTACACAATCGCAACTCCATCGCAATTTGTGTTTTTGTGCATCAGCATGGGCCGACCCTATAGAATTAAT  
AAATTTATGTACTAATTCCTAGGTAATCAATTCAAACACAACAAGCTAGAACAACCGTTCAACGGCAATTTA  
GCGAAGTGTGGAAACCTGTCCCTCAAGTCACTGTTAGGTTTCCTGACAGTGGTTTTAAGGTGTATAGGTACAA  
TGCGGTACTAGATCCTCTAGTTACTGCTTTGTTAGGAGCTTCGATACTAGAAATAGGATTATAGAAGTCGAAA  
ATCAGGCGAACCCGACAACCGCCGAAACGTTAGACGCTACTCGTAGAGTAGATGACGCAACGGTGGCTATAA  
GGAGCGCTATAAATAATTTAGTAGTAGAATTGGTCAAAGGAACAGGTTTGTACAATCAGAGCACATTTGAAA  
GTGCATCCGGTTTACAATGGTCCTCTGCACCTGCATCTTGA

MN882059

ATGGCATACACACAGACAGCTACCACATCCGCTTTGCTCGACACTGTCCGAGGTAACAATACCTTGGTCAACG  
ATCTTGCGAAGCGGCGTCTTTATGACACAGCGGTGACGAGTTCAACGCTCGTGATCGCAGGCCCAAAGTAA  
ATTTTTCCAAAGTAATAAGTGAGGAACAGACGCTTATTGCTACTAGGGCATATCCTGAATTCCAGATAACCTTC  
TATAATACGCAGAACGCCGTGCATTGCTTCCGGTGGACTACGATCCTTAGAACTGGAATATCTAATGATGC  
AGATCCCGTACGGATCACTCACATATGATATAGGTGGGAATTTGCATCTCATCTGTTCAAAGGACGGGCATA  
TGTTCACTGCTGTATGCCAATCTTGATGTCCGCGACATAATGCGGCACGAAGGCCAGAAAGACAGTATAGAA  
TTATACCTTTCCAGGCTTGAGCGGGGCAACAAAGTTGTCCCAAATTTCCAAAAGGAAGCTTTTGACAGATACG  
CTGAAACGCCAGACGAAGTTGTCTGTACAGTACCTTCCAAACGTGTACGCACCAGCAGGTGGAAAACACAG  
GCAGGGTGTATGCTATTGCATTGCACAGTATATACGATATACCTGCTGATGAATTCGGAGCGGCACTTTTAAG  
GAAAAATGTCCATGTTTGTACGCCGCCTTCCACTTTTCCGAGAATTTACTTCTCGAAGATTCACACGTCAACCT  
TGACGAAATCAACGCGTGTTCCTGCGTGATGGAGACAAGCTGACTTTTCTTTCGCATCTGAGAGCACTTTAA  
ATTATTGTCATAGTTATTCTAATATTTTAAAATACGTGTGCAAACTTACTTCCCGGCATCTAATAGAGAGGTCT  
ACATGAAGGAGTTTTTGGTCACCAGGGTTAACACCTGGTTTTGTAAGTTTTCTAGGATAGATACTTTTTTATTAT  
ACAAGGGGGTAGCCCAAAAGGTGTAAATAGTGAGCAATTTTACAGCGCAATGGAAGATGCATGGCACTACA  
AAAAGACTCTTGCAATGTGTAAACAGCGAGAGGATTCTTCTGAAGATTCCTCATCGGTCAATTACTGGTCCCA  
AAAATGAGAGATATGGTCATAGTTCTCTATTGACATATCTCTCGACACTAGTAAAAGGACCCGCAAAGAAG  
TCTTAGTGCAAAGGATTTGTATTACAGTTTTAAATCACATTCGCACTTATCAAGCCAAGGCACCTACATACT  
CCAATGTTTTATCCTTTGTGCAATCAATTCGTTCAAGGGTAATTATCAACGGAGTGACTGCCAGGTCTGAGTGG  
GATGTTGACAAATCTCTTTTGAATCCTTGTCATGACATTTTCTTGCATACTAAGCTTGCCGTTTTAAAAGAC  
GAATTGTTAATCAGCAAGTTTAGTTTGGGGCCAAAATCAGTAAGCCAGCATGTATGGGATGAGATTTCCCTGG  
CTTTTGAAACGCATTTCCATCGATCAAGGAGAGACTGCTAAATCGGAACTAATTAAGTGTGCGGAGACGC  
ATTAGAAATCAGGGTGCCTGATTTATATGTGACTTTTACGATAGATTAGTGACTGAGTACAAAACATCGGTG  
GATATGCCAGTGCTTGATATCAGAAAGAGAATGGAGGAGACTGAGGTTATGTACAATGCATTGTCTGAGCTA  
TCTGTGCTCAAGGAGTCGGACAAGTTGACGTTGATGTTTTTCCCGGATGTGCCAGACTTTGGAGGTAGACC  
CAATGACTGCAGCAAAGGTTATTGTGGCAGTGATGAGCAACGAGAGCGGACTGACTCTTACATTGCAACAGC  
CAACTGAAGCAAATGTCGATTGGCACTTAAAGATTGAGAAAAAGCCTCTGAGGGTGCAGTAGTGTTACTTC  
TAGAGATGTTGAAGAACCATCCATGAAGGGTTCAATGGCAAGAGAGAGTTACAATTGGCCGGTCTGTCTGG  
AGACCAACCAGAGTCTTCCTATACTCGGAACGAGGAAATAGAGTCATTAGAGCAATTCACATGGCAACGGCT  
GGTTCGTTAATTCGGAAACAGATGAGTTGATTGTGTACACGGGCCCATTAAGTTTACAGCAAATGAAAACT  
TTATTGATAGCCTGGTAGCATCACTCTCTGCTGCGGTGTGCAACCTAGTCAAGATCCTAAAGGATACAGCTGCT  
ATAGATCTCGAAACCCGTCAGAAGTTTGGAGTCTTAGATGTTGCGACCAAAGATGGTTAATTAACCTTTAG  
CCAAGAATCACGCATGGGGCGTTATTGAAACACATGCTAGGAAGTACCACGTTGCACTTTTGGAGTATGATGA  
GCATGGAGTGGTAACTAGCGACAGTTGGAGAAGGGTGGCCGTGAGTTCTGAGTCAATGGTTTATTCTGATAT  
GGCAAAGCTCAGAACTGAGGAGATTATTAAGAGATGGTGAGCCTCATGTCAGCAGTGCTAAAGTCGTCT  
AGTTGACGGTGTCCCGGTTGTGGAAAGACAAAAGAGATTCTCTCGAAAGTAAATTTGAGGAAGATCTAAT  
CTTAGTACCGGTAAAGCAGGCTGCTGAAATGATAAAGAGGCGTGCTAATGCGTCAGGAATAATTCAAGCCAC  
AAGAGATAATGTTCTGACTGTTGATTCAATTTATAATGAATTACGGTAAAGGAACACGCTGTCAGTTCAAAGG



TTATTTATCGACGAAGGTCTGATGTTGCACACTGGTTGTGTGAATTTCTTGTTTCTATGTCTCTGTGCGAAATT  
GCATATGTTTATGGAGACACACAACAAATTCCATACATCAACAGAGTATCCGGTTTTCCGTACCCTGCACATTT  
TGCAAAAATAGAGGTTGATGAGGTGGAACCTCGCAGAACTACGCTGCGTTGTCCAGCCGACATTACCCACTAT  
CTTAACAGAAGGTACGAAGGACATGTCATGTGTACATCGTCGGTTAAAAAGTCAGTTTCTCAGGAAATGGTGA  
GCGGGGCCGAATGATCAATCCTGTATCTAAGCCATTGAATGGGAAAGTTTTGACTTTCACTCAGTCTGATAA  
AGAGGCGCTGCTTTCTCGAGGATATACGGACGTCCATACAGTACATGAGGTACAAGGTGAGACATATGCAGA  
TGTGTCGTTGGTCAGATTGACTCCGACACCTGTATCTATCATCGCAGGAGATAGTCCGCACGTTCTCGTAGCTT  
TGTCAAGGCATACCCAAACATTGAAGTATTACACCGTAGTGATGGATCCTCTTGTAAGTATAAATTAGGGATTTA  
GAAAACTTAGTTCTTACTTGTTAGATATGTATAAAGTAGATGCAGGGACCCAATAGCAATTACAGGTAGACT  
CCGTGTTTAAAGGTTCTAATCTTTTTGTTGCAGCACCAAGACTGGAGATATCTCAGATATGCAATTTTACTAT  
GATAAGTGTCTCCAGGTAATAGCACCATGTTAAATACTATGATGCTGTTACCATGAGGTTGACTGACATTTT  
TCTTAATGTCAAAGATTGCATATTGGATTTCTCTAAGTCTGTGGCTGCACCGAAGGATCCGATCAAACCACTGA  
TTCCAATGGTACGAACGGCGGCAGAAATGCCACGCCAGACTGGACTATTGGAAAATTTGGTGGCGATGATCA  
AAAGAACTTTAATTCACCGGAGTTATCAGGAATAATCGACATTGAGAATACTGCATCTTAGTAGTAGATAA  
ATTTTTGATAGTTACTTGCTTAAAGAAAAAGAAAAACCAAATAAAAAATGTTTCTTTATTTGTAGAGAGTCTCT  
CAATAGATGGTTAGAGAAGCAGGAGCAAGTGACCATTGGTCAGCTTGCAGATTTTGATTTTGTGGATCTTCCT  
GCCGTTGATCAGTACAGGCATATGATTAAAGCGCAACCTAAGCAGAAGCTGGATACATCAATTCAAAGCGAAT  
ATCCGGCCTTGACAGACGATTGTGTATCATTGAAAAAGATCAACGCAATCTTCGGTCCTTTGTTTCAGTGAGCTC  
ACAAGGCAAATGCTCGAAAGCATAGACTCAAGTAAGTTTTGTTCTTTACAAGGAAGACGCCAGCTCAAATTG  
AGGATTTCTTCGGAGATCTCGATAGCCATGTCCCTATGGATATCTTGAGTTGGATATTTGGAAGTATGACAAA  
TCTCAGAACGAGTTCCACTGTGCAGTAGAGTATGAAATATGGAGAAGACTTGGATTAGAAGATTTTCTGGGA  
GAAGTTTGAAACAAGGCCACAGGAAAACTACTCTTAAAGATTACACAGCTGGTATTAACCGTGTTTATGGT  
ACCAGAGAAAAGAGTGGGGACGTTACAACATTATCGGGAATACGGTGATTATTGCTGCTTGTTAGCTTCCAT  
GTTACCCATGGAGAAAATAATCAAAGGTGCATTTTGCGGAGATGACAGTTTACTATACTTCCAAAAGGTTGT  
GAGTTTCTGACATACAGCATAACAGCAACCTTATGTGGAATTTGAGGCTAAGCTATTCAGAAAGCAGTATG  
GTTATTTCTGTGGAAGGTACGTGATACATCATGACAGAGGGTGTATTGTTTATTATGACCTTTGAAGTTGATT  
TCTAACTTGGTGCTAAACACATCAAGGATTGGGATCACTTAGAAGAGTTCAGAAGATCCCTTTGTGATGTTG  
CAAATTCGTTGAACAACCTGTGCGTATTACACGCAGTTGGACGACGCTGTGAGTGAGGTCCATAAAACCGCACC  
CCCGGGTTCGTTTGATATAAAAGTTAGTTAAATATCTGTCCGATAAGGTTCTTTTTAGAAAGTTGTTTATAGA  
TGGCTCTTGTTAAGGGTAAAGTCAATATTAATGAGTTCATAGACTTGTCAAATCAGAAAAATTTCTCCGTCT  
ATGTTACACCTGTTAAGAGTGTGATCTCCAAGGTTGATAAGATATTGGTTCATGAAGATGAATCTTTGTC  
CGAAGTCAATTTACTCAAAGGTGTAAACTCATTGATGGTGGCTATGTACATCTTGCTGGTCTTGTTGGTGACA  
GGTGAATGGAATTTGCCAGATAATTGTCGTGGTGGTGTGAGTGTCTGTTTGGTCGATAAAAGAATGGAGAGA  
GCGGACGAGGCAACTCTTGCTTCATACTATACCGCAGCGGCTAAGAAAAGGTTTCAGTTCAAAGTCGTTCCAA  
ATTACAACATCACTACCAAGGACGCAGAAAAGGCAGTTTGCAAGTACTAGTTAATATTAGAAATGTTAAAA  
TGCTGCGGGTTACTGTCCGCTGTCATTAGAATTTGTGTGAGTGTGATTGTTTATAAAAAATATTATAAACTCG  
GTTTGAGAGAGAAAATTACGAGCGTCACGGATGGAGGGCCCATGGAATATCAGAAGAAGTTGTTGATGAG  
TTCATGGAAGAAGTCCCGATGTCTGTAAGGCTTGCAAAATTTGTTTGAAGACCGGGAAAAAGTTTAGTAGTA  
AAAGTGAGAATAATAGTGGTAATAATAGGCCGAAACCAACAAAAACCAAAGGAAGGAAAAGGGTTTAAAA  
GTTAGGGTTGAGAAGGATAATTTAATTGATAATGAATTGGAGACTTACGTCGCCGATTGAGATTCGATTAA  
TATGTCTTACACAATCGCAACTCCATCGCAATTTGTGTTTTTGTATCAGCATGGGCCGACCCTATAGAATTAAT  
AAATTTATGTACTAATTCAGTAGGTAATCAATTCAAACACAACAAGCTAGAACAACCGTTCAACGGCAATTTA  
GCGAAGTGTGGAACCTGTCCCTCAAGTCACTGTTAGGTTTCTGACAGTGGTTTTAAGGTGTATAGGTACAA  
TGCGGTACTAGATCCTCTAGTTACTGCTTTGTTAGGAGCTTTGATACTAGAAATAGGATTATAGAAGTCGAAA  
ATCAGGCGAACCCGACAACCGCCGAAACGTTAGACGCTACTCGTAGAGTAGATGACGCAACGGTGGCTATAA  
GGAGCGCTATAATAATTTAGTAGTAGAATTGGTCAAAGGAACAGGTTTGTACAATCAGAGCACATTTGAAA  
GTGCATCCGGTTTACAATGGTCCTCTGCACCTGCATCTTGA

MN882062

ATGGCATACACACAGACAGCTACCACATCCGCTTTGCTCGACACTGTCCGAGGTAACAATACCTTGGTCAACG  
ATCTTGCGAAGCGGCGTCTTTATGACACAGCGGTGACGAGTTCAACGCTCGTGATCGCAGGCCCAAAGTAA  
ATTTTTCCAAAGTAATAAGTGAGGAACAGACGCTTATTGCTACTAGGGCATATCCTGAATTCCAGATAACCTTC  
TATAATACGCAGAACGCCGTGCATTGCTTGCCGGTGGACTACGATCCTTAGAACTGGAATATCTAATGATGC  
AGATCCCGTACGGATCACTCACATATGATATAGGTGGGAATTTTGCATCTCATCTGTTCAAAGGACGGGCATA  
TGTTCACTGCTGTATGCCCAATCTTGATGTCCGCGACATAATGCGGCACGAAGGCCAGAAAGACAGTATAGAA  
TTATACCTTTCCAGGCTTGAGCGGGGCAACAAAGTTGTCCCAAATTTCCAAAAGGAAGCTTTTGACAGATACG  
CTGAAACGCCAGACGAAGTTGTCTGTACAGTACCTTCCAAACGTGTACGCACCAGCAGGTGGAAAACACAG  
GCAGGGTGTATGCTATTGCATTGCACAGTATATACGATATACCTGCTGATGAATTCGGAGCGGCACTTTTAAG  
GAAAAATGTCCATGTTTGTACGCCGCTTCCACTTTTCCGAGAATTTACTTCTCGAAGATTCACACGTCAACCT  
TGACGAAATCAACGCGTGTTCGCGTGATGGAGACAAGCTGACTTTTTCTTTCGCATCTGAGAGCACTTTAA  
ATTATTGTCATAGTTATTCTAATATTTAAAATACGTGTGCAAACTTACTTCCCGGCATCTAATAGAGAGGTCT  
ACATGAAGGAGTTTTTGGTCACCAGGGTTAACACCTGGTTTTGTAAGTTTTCTAGGATAGATACTTTTTATTAT  
ACAAGGGGGTAGCCCAAAAGGTGTAAATAGTGAGCAATTTTACAGCGCAATGGAAGATGCATGGCACTACA  
AAAAGACTCTTGCAATGTGTAACAGCGAGAGGATTCTTCTGAAGATTCCTCATCGGTCAATTACTGGTCCCA  
AAAATGAGAGATATGGTCATAGTTCCTCTATTGACATATCTCTCGACACTAGTAAAAGGACCCGCAAAGAAG  
TCTTAGTGCAAAGGATTTTGTATTACAGTTTTAAATCACATTCGCACTTATCAAGCCAAGGCACTTACATACT  
CCAATGTTTTATCCTTTGTGAATCAATTGTTCAAGGGTAATTATCAACGGAGTGACTGCCAGGTCTGAGTGG  
GATGTTGACAAATCTTTTTGCAATCCTTGTCATGACATTTTTCTTGCATACTAAGCTTGCCGTTTTAAAGAC  
GAATTGTTAATCAGCAAGTTTAGTTTGGGGCCAAAATCAGTAAGCCAGCATGTATGGGATGAGATTTCCCTGG  
CTTTTGAAACGCATTTCCATCGATCAAGGAGAGACTGCTAAATCGGAACTAATTAAGTGTCGGGAGACGC  
ATTAGAAATCAGGGTGCCTGATTTATATGTGACTTTTACGATAGATTAGTGACTGAGTACAAAACATCGGTG  
GATATGCCAGTGCTTGATATCAGAAAGAGAATGGAGGAGACTGAGGTTATGTACAATGCATTGTCTGAGCTA  
TCTGTGCTCAAGGAGTCGGACAAGTTCGACGTTGATGTTTTTCCCGGATGTGCCAGACTTTGGAGGTAGACC  
CAATGACTGCAGCAAAGGTTATTGTGGCAGTGATGAGCAACGAGAGCGGACTGACTCTTACATTGCAACAGC  
CAACTGAAGCAAATGTCGATTGGCACTTAAAGATTGAGAAAAAGCCTCTGAGGGTGCCTAGTGTTACTTC  
TAGAGATGTTGAAGAACCATCCATGAAGGGTTCAATGGCAAGAGGAGATTACAATTGGCCGGTCTGTCTGG  
AGACCAACCAGAGTCTTCCTATACTCGGAACGAGGAAATAGAGTCATTAGAGCAATTCCACATGGCAACGGCT  
GGTTCGTTAATTCGGAAACAGATGAGTTCGATTGTGTACACGGGCCCATTAAGTTGAGCAAATGAAAACT  
TTATTGATAGCCTGGTAGCATCACTCTCTGCTGCGGTGTGCAACCTAGTCAAGATCCTAAAGGATACAGCTGCT  
ATAGATCTCGAAACCCGTCAGAAGTTTGGAGTCTTAGATGTTGCGACCAAAGATGGTTAATTAACCTTTAG  
CCAAGAATCACGCATGGGGCGTTATTGAAACACATGCTAGGAAGTACCAGTTGCACTTTTGGAGTATGATGA  
GCATGGAGTGGTAACTTGCGACAGTTGGAGAAGGGTGGCCGTGAGTTCTGAGTCAATGGTTTATTCTGATAT  
GGCAAAGCTCAGAACTGAGGAGATTATTAAGAGATGGTGAGCCTCATGTCAGCAGTGCTAAAGTCGTCTT  
AGTTGACGGTGTCCCGGGTTGTGGAAAGACAAAAGAGATTCTCTCGAAAGTAAATTTTGAGGAAGATCTAAT  
CTTAGTACCGGGTAAGCAGGCTGCTGAAATGATAAAGAGGCGTGCTAATGCGTCAGGAATAATTCAAGCCAC  
AAGAGATAATGTTCTGACTGTTGATTCAATTTATAATGAATTACGGTAAAGGAACACGCTGTCAGTTCAAAGG  
TTATTTATCGACGAAGGTCTGATGTTGCACACTGGTTGTGTGAATTTTCTGTTTCTATGTCTCTGTGCGAAAT  
GCATATGTTTATGGAGACACACAACAAATTCCATACATCAACAGAGTATCCGGTTTTCCGTACCCTGCACATTT  
TGCAAAAATAGAGGTTGATGAGGTGGAACTCGCAGAACTACGCTGCGTTGTCCAGCCGACATTACCACTAT  
CTTAACAGAAGGTACGAAGGACATGTCATGTGTACATCGTCGGTTAAAAAGTCAGTTTCTCAGGAAATGGTGA  
GCGGGGCCGCAATGATCAATCCTGTATCTAAGCCATTGAATGGGAAAGTTTGACTTTCCTCAGTCTGATAA  
AGAGGCGCTGCTTCTCGAGGATATACGGACGTCCATACAGTACATGAGGTACAAGGTGAGACATATGCAGA  
TGTGTGCTTGGTCAGATTGACTCCGACACCTGTATCTATCATCGCAGGAGATAGTCCGCACGTTCTCGTAGCTT  
TGTCAAGGCATACCCAAACATTGAAGTATTACACCGTAGTGATGGATCCTCTTGTAAGTATAATTAGGGATTTA

GAAAACTTAGTTCCTTACTTGTTAGATATGTATAAAGTAGATGCAGGGACCCAATAGCAATTACAGGTAGACT  
CCGTGTTTAAAGGTTCTAATCTTTTTGTTGCAGCACCAAGACTGGAGATATCTCAGATATGCAATTTTACTAT  
GATAAGTGTCTCCAGGTAATAGCACCATGTTAAATACTATGATGCTGTTACCATGAGGTTGACTGACATTTT  
TCTTAATGTCAAAGATTGCATATTGGATTTCTCTAAGTCTGTGGCTGCACCGAAGGATCCGATCAAACCACTGA  
TTCCAATGGTACGAACGGCGGCAGAAATGCCACGCCAGACTGGACTATTGGAAAATTTGGTGGCGATGATCA  
AAAGAACTTTAATTCACCGGAGTTATCAGGAATAATCGACATTGAGAATACTGCATCTTAGTAGTAGATAA  
ATTTTTGATAGTTACTTGCTTAAAGAAAAAGAAAACCAAATAAAAATGTTTCTTTATTTGTAGAGAGTCTCT  
CAATAGATGGTTAGAGAAGCAGGAGCAAGTGACCATTGGTCAGCTTGCAGATTTTGATTTGTGGATCTTCTCT  
GCCGTTGATCAGTACAGGCATATGATTAAAGCGCAACCTAAGCAGAAGCTGGATACATCAATTCAAAGCGAAT  
ATCCAGCCTTGCAGACGATTGTGTATCATTGAAAAAGATCAACGCAATCTTCGGTCTTTGTTCAAGTGAGCTC  
ACAAGGCAAATGCTCGAAAGCATAGACTCAAGTAAGTTTTGTTCTTTACAAGGAAGACGCCAGCTCAAATTG  
AGGATTTCTTCGGAGATCTCGATAGCCATGTCCCTATGGATATCTTGAGTTGGATATTTGGAAGTATGACAAA  
TCTCAGAACGAGTTCCACTGTGCAGTAGAGTATGAAATATGGAGAAGACTTGGATTAGAAGATTTTCTGGGA  
GAAGTTTGGAACAAGGCCACAGGAAAACCTACTCTTAAAGATTACACAGCTGGTATTAACCGTGTTTATGGT  
ACCAGAGAAAAGAGTGGGGACGTTACAACATTCATCGGTAATACGGTGATTATTGCTGCTTGTTAGCTTCCAT  
GTTGCCCATGGAGAAAATAATCAAAGGTGCATTTTGGGAGATGACAGTTTACTATACTTCCAAAAGGTTGT  
GAGTTTCTTGACATACAGCATACAGCCAACCTTATGTGGAATTTGAGGCTAAGCTATTCAGAAAGCAGTATG  
GTTATTTCTGTGGAAGGTACGTGATACATCATGACAGAGGGTGTATTGTTTATTATGACCTTTGAAGTTGATT  
TCTAAACTTGGTGCTAAACACATCAAGGATTGGGATCACTTAGAAGAGTTCAGAAGATCCCTTTGTGATGTTG  
CAAATTCGTTGAACAACTGTGCGTATTACACGCAGTTGGACGACGCTGTGAGTGAGGTCCATAAAACCGCACC  
CCCGGGTTCGTTTGATATAAAAGTTAGTTAAATATCTGTCCGATAAGGTTCTTTTAGAAGTTTGTATAGA  
TGGCTCTTGTTAAGGGTAAAGTCAATATTAATGAGTTCATAGACTTGTCAAAATCAGAAAAATTTCTTCCGTCT  
ATGTTACACCTGTTAAGAGTGTGATGATCTCCAAGGTTGATAAGATATTGGTTCATGAAGATGAATCTTTGTC  
CGAAGTCAATTTACTCAAAGGTGTAAACTCATTGATGGTGGCTATGTACATCTTGCTGGTCTTGTTGGTGACA  
GGTGAATGGAATTTGCCAGATAATTGTCGTGGTGGTGTGAGTGTCTGTTTGGTCGATAAAAGAATGGAGAGA  
GCGGACGAGGCAACTCTTGCTTCACTATACCGCAGCGGCTAAGAAAAGGTTTCAGTTCAAAGTCGTTCCAA  
ATTACAACATCACTACCAAGGACGCAAAAAAGGCAGTTTGGCAAGTACTAGTTAATATTAGAAATGTTAAAT  
TGCTGCGGGTACTGTCCGCTGTCATTAGAATTTGTGTGAGTGTGATTGTTTATAAAAATATTATAAACTCG  
GTTTGAGAGAGAAAATTACGAGCGTAACGGATGGAGGGCCCATGGAAGTATCAGAAGAAGTTGTTGATGAG  
TTCATGGAAGAAGTCCCGATGTCTGTAAGGCTTGCAAAATTTGTTTGAAGACCGGGAAAAAGTTTAGTAGTA  
AAAGTGAGAATAATAGTGGTAATAATAGGCCGAAACCAAACAAAAACCAAAGGAAGGAAAAGGGTTTAAAA  
GTTAGGGTTGAGAAGGATAATTTAATTGATAATGAATTGGAGACTTACGTCGCCGATTCAGATTCGTATTA  
TATGTCTTACACAATCGCAACTCCATCGCAATTTGTGTTTTGTGTCATCAGCATGGGCCGACCCTATAGAATTA  
AAATTTATGTACTAATTCCTAGGTAATCAATTCAAACACAACAAGCTAGAACAACCGTTCAACGGCAATTTA  
GCGAAGTGTGGAACCTGTCCCTCAAGTCACTGTTAGGTTTCTGACAGTGGTTTAAAGGTGTATAGGTACAA  
TGCGGTACTAGATCCTCTAGTTACTGCTTTGTTAGGAGCTTCGATACTAGAAATAGGATTATAGAAGTCGAAA  
ATCAGGCGAACCCGACAACCGCCGAAACGTTAGACGCTACTCGTAGAGTAGATGACGCAACGGTGGCTATAA  
GGAGCGCTATAAATAATTTAGTAGTAGAATTGGTCAAAGGAACAGGTTTGTACAATCAGAGCACATTTGAAA  
GTGCATCCGGTTACAATGGTCCTCTGCACCTGCATCTTGA

#MT002973

ATGGCATACACAGACAGCTACCACATCCGCTTTGCTCGACACTGTCCGAGGTAACAATACCTTGGTCAACG  
ATCTTGCGAAGCGGCGTCTTTATGACACAGCGGTGACGAGTTCAACGCTCGTGATCGCAGGCCCAAAGTAA

ATTTTCCAAAGTAATAAGTGAGGAACAGACGCTTATTGCTACTAGGGCATATCCAGAATTCCAGATAACCTTC  
TATAATACGCAGAACGCCGTGCATTGCTTGCCGGTGGACTACGATCCTTAGAACTGGAATATCTAATGATGC  
AGATCCCGTACGGATCACTCACATATGATATAGGTGGGAATTTGCATCTCATCTGTTCAAAGGACGGGCATA  
TGTTCACTGCTGTATGCCAATCTTGATGTCCGCGACATAATGCGGCACGAAGGCCAGAAAGACAGTATAGAA  
TTATACCTTTCCAGGCTTGAGCGGGGCAACAAAGTTGTCCCAAATTTCCAAAAGGAAGCTTTTGACAGATACG  
CTGAAACGCCAGACGAAGTTGTCTGTACAGTACCTTCCAAACGTGTACTCACCAGCAGGTGGAAAACACAG  
GCAGGGTGTATGCTATTGCATTGCACAGTATATACGATATACCTGCTGATGAATTCGGAGCGGCACTTTTAAG  
AAAAATGTCCATGTTTGTACGCCCTTCCACTTTTCCGAGAATTTACTTCTCGAAGATTCACACGTCAACCT  
TGACGAAATCAACGCGTGTTTTCGCGTGATGGAGACAAGCTGACTTTTTCTTTCGCATCTGAGAGCACTTTAA  
ATTATTGTCATAGTTATTCTAATATTTTAAAATACGTGTGCAAACTTACTTCCCGGCATCTAATAGAGAGGTCT  
ACATGAAGGAGTTTTTGGTCACCAGGGTTAACACCTGGTTTTGTAAGTTTTCTAGGATAGATACTTTTTATTAT  
ACAAGGGGGTAGCCCAAAAGGTGTAAATAGTGAGCAATTTTACAGCGCAATGGAAGATGCATGGCACTACA  
AAAAGACTCTTGCAATGTGTAAACAGCGAGAGGATTCTTCTGAAGATTCCTCATCGGTCAATTACTGGTTCCTCA  
AAAATGAGAGATATGGTCATAGTTCTCTATTGACATATCTCTCGACACCAGTAAAAGGACCCGCAAAGAAG  
TCTTAGTGCAAAGGATTTTGTATTACAGTTCTAAATCACATTCGCACTTATCAAGCCAAGGCACTTACATACT  
CCAATGTTTTATCCTTTGTGAATCAATTCGTTCAAGGGTAATTATCAACGGAGTGACTGCCAGGTCTGAGTGG  
GATGTTGACAAATCTTTTTGCAATCCTTGTCATGACATTTTTCTGCATACTAAGCTTGCCGTTTTAAAAGAC  
GAATTGTTAATCAGCAAGTTAGTTTGGGGCCAAAATCAGTAAGCCAGCATGTATGGGATGAGATTTCCCTGG  
CTTTGGAAACGCATTTCCATCGATCAAGGAGAGACTGCTAAATCGGAACTAATTAAGTGTCGGGAGACGC  
ATTAGAAATCAGGGTGCCTGATTTATATGTGACTTTTACGATAGATTAGTGACTGAGTACAAAACATCGGTG  
GATATGCCAGTGCTTGATATCAGAAAGAGAATGGAGGAGACTGAGGTTATGTACAATGCATTGTCTGAGCTA  
TCTGTGCTCAAGGAGTCGGACAAGTTCGACGTTGATGTTTTTCCCGGATGTGCCAGACTTTGGAGGTAGACC  
CAATGACTGCAGCAAAGGTTATTGTGGCAGTGATGAGCAACGAGAGCGGACTGACTCTCACATTCGAACAGC  
CAACTGAAGCAAATGTGCGATTGGCACTTAAAGATTGAGAAAAAGCCTCTGAGGGTGCCTAGTGGTTACTTC  
TAGAGATGTTGAAGAACCATCCATGAAGGGTCAATGGCAAGAGGAGATTACAATTGGCCGGTCTGTCTGG  
AGACCAACCAGAGTCTTCTATACTCGGAACGAGGAAATAGAGTCATTAGAGCAATTCACATGGCAACGGCT  
AGTTCGTTAATTCGGAAACAGATGAGTTCGATTGTGTACACGGGCCCCATTAAAGTTCAGCAAATGAAAACT  
TTATTGATAGCCTGGTAGCATCACTCTCTGCTGCGGTGTGCAACCTAGTCAAGATCCTAAAGGATACAGCTGCT  
ATAGATCTCGAAACCCGTCAGAAGTTTGGAGTCTTAGATGTTGCGACCAAAGATGGTTAATTAACCTTTAG  
CCAAGAATCACGCATGGGGCGTTATTGAAACACATGCTAGGAAGTACCACGTTGCACTTTGGAGTATGATGA  
GCATGGAGTGGTAACTTGCGACAGTTGGAGAAGGGTGGCCGTGAGTTCTGAGTCAATGGTTTATTCTGATAT  
GGCAAAGCTCAGAACTGAGGAGATTATTAAGAGATGGTGAGCCTCATGTCAGCAGTGCTAAAGTCGTCTCT  
AGTTGACGGTGTCCGGGTTGTGGAAAAGACAAAAGAGATTCTCTCGAAAGTAAATTTGAGGAAGATCTAAT  
CTTAGTACCGGGTAAGCAGGCTGCTGAAATGATAAAGAGGCGTGCTAATGCGTCAGGAATAATTCAAGCCAC  
AAGAGATAATGTTCTGACTGTTGATTATTATAATGAATTACGGTAAAGGAACACGCTGTCAGTTCAAAGG  
TTATTTATCGACGAAGGTCTGATGTTGCACACTGGTTGTGTGAATTTCTTGTCTATGTCTCTGTGCGAAATT  
GCATATGTTTATGGAGACACACAACAAATTCCATACATCAACAGAGTATCCGGTTTTCCGTACCCTGCACATTT  
TGCAAAAATAGAGGTTGATGAGGTGGAACTCGCAGAACTACGCTGCGTTGTCCAGCCGACATTACCCACTAT  
CTTAACAGAAGGTACGAAGGACATGTCATGTGTACATCGTCGGTTAAAAGTCAGTTTCTCAGGAAATGGTGA  
GCGGGGCCGCAATGATCAATCCTGTATCTAAGCCATTGAATGGGAAAGTTTTGACTTTCACTCAGTCTGACAA  
AGAGGCGCTGCTTCTCGAGGATATACGGACGTCCATACAGTACATGAGGTACAAGGTGAGACATATGCAGA  
TGTGTCGTTGGTCAGATTGACTCCGACACCTGTATCTATTATCGCAGGAGATAGTCCGCACGTTCTCGTAGCTT  
TGTCAGGCATACCCAAACATTGAAGTATTACACCGTAGTGATGGATCCTCTTGTAAGTATAATTAGGGATTTA  
GAAAACTTAGTTCTTACTTGTTAGATATGTATAAAGTAGATGCAGGGACCCAATAGCAATTACAGGTAGACT  
CCGTGTTTAAAGGTTCTAATCTTTTTGTTGCAGCACCAAGACTGGAGATATCTCAGATATGCAATTTTACTAT  
GATAAGTGTCTCCAGGTAATAGCACCATGTTAAATAACTATGATGCTGTTACCATGAGGTTGACTGACATTTT  
TCTTAATGTCAAAGATTGCATATTGGATTTCTCTAAGTCTGTGGCTGCACCGAAGGATCCGATCAAACCACTGA  
TTCCAATGGTACGAACGGCGGCAGAAATGCCACGCCAGACTGGACTATTGGAAAATTTGGTGGCGATGATCA

AAAGAACTTTAATTCACCGGAGTTATCAGGAATAATCGACATTGAGAATACTGCATCTTTAGTAGTAGATAA  
ATTTTTTGATAGTTACTTGCTTAAAGAAAAAGAAAACCAAATAAAAATGTTTCTTTATTTGTAGAGAGTCTCT  
CAATAGATGGTTAGAGAAGCAGGAGCAAGTGACCATTGGTCAGCTTGCAGATTTTGATTTGTGGATCTTCCT  
GCCGTTGATCAGTACAGGCATATGATTAAAGCGCAACCTAAGCAGAAGCTGGATACATCAATTCAAAGCGAAT  
ATCCGGCCTTGACAGACGATTGTGTATCATTCGAAAAAGATCAACGCAATCTTCGGTCCTTTGTTTCAGTGAGCTC  
ACAAGGCAAATGCTCGAAAGCATAGACTCAAGTAAGTTTTTGTCTTTACAAGGAAGACGCCAGCTCAAATTG  
AGGATTTCTTCGGAGATCTCGATAGCCATGTCCCTATGGATATCTTGGAGTTGGATATTTCGAAGTATGACAAA  
TCTCAGAACGAGTTCCACTGTGCAGTAGAGTATGAAATATGGAGAAGACTTGGATTAGAAGATTTTCTGGGA  
GAAGTTTGAAAACAAGGCCACAGGAAAACCTACTCTTAAAGATTACACAGCTGGTATTAACCGTGTTTATGGT  
ACCAGAGAAAAGAGTGGGGACGTTACAACATTCATCGGTAATACGGTGATTATTGCTGCTTGTAGCTTCCAT  
GTTGCCCATGGAGAAAATAATCAAAGGTGCATTTTGGGAGATGACAGTTTACTATACTTCCAAAAGGTTGT  
GAGTTTCTGACATACAGCATAACGCCAACCTTATGTGGAATTTTCGAGGCTAAGCTATTCAGAAAGCAGTATG  
GTTATTTCTGTGGAAGGTACGTGATACATCATGACAGAGGGTGTATTGTTTATTATGACCTTTGAAGTTGATT  
TCTAACTTGGTGCTAAACACATCAAGGATTGGGATCACTTAGAAGAGTTCAGAAGATCCCTTTGTGATGTTG  
CAAATTCGTTGAACAACTGTGCGTATTACACGCAGTTGGACGACGCTGTGAGTGAGGTCCATAAACCGCACC  
CCCGGGTTCGTTTGTATATAAAAGTTAGTTAAATATCTGTCGATAAGGTTCTTTTAGAAGTTTGTATAGA  
TGGCTCTTGTTAAGGGTAAAGTCAATATTAATGAGTTCATAGACTTGTCAAATCAGAAAAATTTCTCCGTCT  
ATGTTACACCTGTTAAGAGTGTGATGATCTCAAGGTTGATAAGATATTGGTTCATGAAGATGAATCTTTGTC  
CGAAGTCAATTTACTCAAAGGTGTAAACTCATTGATGGTGGCTATGTACATCTTGCTGGTCTTGTGGTGACA  
GGTGAATGGAATTTGCCAGATAATTGTCGTGGTGGTGTGAGTGTCTGTTTGGTCGATAAGAGAATGGAGAGA  
GCGGACGAGGCAACTCTTGCTTCTACTATACCGCAGCGGCTAAGAAAAGGTTTCAGTTCAAAGTCGTTCCAA  
ATTACAACATCACTACCAAGGACGCAGAAAAGGCAGTTTGGCAAGTACTAGTTAATATTAGAAATGTTAAAT  
TGCTGCGGGTACTGTCCGCTGTCATTAGAATTTGTGTCAGTGTGATTGTTTATAAAAATATTATAAACTCG  
GTTTGAGAGAGAAAATTACGAGCGTCACGGATGGAGGGCCCATGGAAGTATCAGAAGAAGTTGTTGATGAG  
TTCATGGAAGAAGTCCCGATGTCTGTAAGGCTTGCAAAATTTGTCGGAAGACCGGAAAAAAGTTTAGTAGTA  
AAAGTGAGAATAATAGTGGTAATAATAGGCCGAAACCAAACAAAAACCAAAGGAAGGAAAAGGGTTAAAA  
ATTAGGGTTGAGAAGGATAATTTAATTGATAATGAATTGGAGACTTACGTCGCCGATTGAGATTCGTATTAAA  
TATGTCTTACACAATCGCAACTCCATCGCAATTTGTGTTTTTGTATCAGCATGGGCCGACCCTATAGAATTAAT  
AAATTTATGTACTAATTCAGTGGTAATCAGTTCCAAACACAACAAGCTAGAACAACCGTTCAACGGCAATTTA  
GCGAAGTGTGGAACCTGTCCCTCAAGTCACTGTTAGGTTTCTGACAGTGGTTTAAAGGTGTATAGGTACAA  
TGCGGTACTAGATCCTCTAGTTACTGCTTTGTTAGGAGCTTTCGATACTAGAAATAGGATTATAGAAGTCGAAA  
ATCAGGCGAACCCGACAACCGCCGAAACGTTAGACGCTACTCGTAGAGTAGATGACGCAACGGTGGCTATAA  
GGAGCGCTATAAATAATTTAGTAGTAGAATTGGTCAAAGGAACAGGTTTGTACAATCAGAGCACATTTGAAA  
GTGCATCCGGTTTACAATGGTCCTCTGCACCTGCATCTTGA

#MT018320

1

ATGGCATACACACAGACAGCTACCACATCCGCTTTGCTCGACACTGTCCGAGGTAACAATACCTTGGTCAACG  
ATCTTGCGAAGCGGCGTCTTTATGACACAGCGGTCGACGAGTTCAACGCTCGTGATCGCAGGCCCAAAGTAA  
ATTTTCCAAAGTAATAAGTGAGGAACAGACGCTTATTGCTACTAGGGCATATCCAGAATTCAGATAACCTTC  
TATAATACGCAGAACGCCGTGCATTCGCTTGCCGGTGGGCTACGATCCTTAGAACTGGAATATCTAATGATGC  
AGATCCCGTACGGATCACTCACATATGATATAGGTGGGAATTTGCATCTCATCTGTTCAAAGGACGGGCATA  
TGTTCACTGCTGTATGCCAATCTTGATGTCCGCGACATAATGCGGCACGAAGGCCAGAAAGACAGTATAGAA  
TTATACCTTTCCAGGCTTGAGCGGGGCAACAAAGTTGTCCCAAATTTCCAAAAGGAAGCTTTTACAGATACG

CTGAAACGCCAGACGAAGTTGTCTGTACAGTACCTTCCAAACGTGTACGCACCAGCAGGTGGAAAACACAG  
GCAGGGTGTATGCTATTGCATTGCACAGTATATACGATATACCTGCTGATGAATTCGGAGCGGCACTTTTAAG  
GAAAAATGTCCATGTTTGTACGCCCTTCCACTTTTCCGAGAATTTACTTCTCGAAGATTCACACGTCAACCT  
TGACGAAATCAACGCGTGTTTTTCGCGTGATGGAGACAAGCTGACTTTTTCTTTCGCATCTGAGAGCACTTTAA  
ATTATTGTCATAGTTATTCTAATATTTTAAAATACGTGTGCAAACTTACTTCCCGGCATCTAATAGAGAGGTCT  
ACATGAAGGAGTTTTTGGTCACCAGGGTTAACACCTGGTTTTGTAAGTTTTCTAGGATAGATACTTTTTATTAT  
ACAAGGGGGTAGCCCAAAAGGTGTAAATAGTGAGCAATTTTACAGCGCAATGGAAGATGCATGGCACTACA  
AAAAGACTCTTGCAATGTGTAACAGCGAGAGGATTCTTCTGAAGATTCCTCATCGGTCAATTACTGGTCCCCA  
AAAATGAGAGATATGGTCATAGTTCTCTATTTCGACATATCTCTCGACACCAGTAAAAGGACCCGCAAAGAAG  
TCTTAGTGTCAAAGGATTTTGTATTACAGTTTTAAATCACATTCGCACTTATCAAGCCAAGGCACTTACATACT  
CCAATGTTTTATCCTTTGTGCAATCAATTCGTTCAAGGGTAATTATCAACGGAGTGACTGCCAGGTCTGAGTGG  
GATGTTGACAAATCTTTTTGCAATCCTTGTCATGACATTTTTCTGCATACTAAGCTTGCCGTTTTAAAAGAC  
GAATTGTTAATCAGCAAGTTTAGTTTGGGGCCAAAATCAGTAAGCCAGCATGTATGGGATGAGATTTCCCTGG  
CTTTTGAAACGCATTTCCATCGATCAAGGAGAGACTGCTAAATCGGAACTAATTAAGTGTCGGGAGACGC  
ATTAGAAATCAGGGTGCCTGATTTATATGTGACTTTTACGATAGATTAGTGACTGAGTACAAAACATCGGTG  
GATATGCCAGTGCTTGATATCAGAAAGAGAATGGAGGAGACTGAGGTTATGTACAATGCATTGTCTGAGCTA  
TCTGTGCTCAAGGAGTCGGACAAGTTCGACGTTGATGTTTTTCCCGGATGTGCCAGACTTTGGAGGTAGACC  
CAATGACTGCAGCAAAGTTATTGTGGCAGTGATGAGCAACGAGAGCGGACTGACTCTTACATTGCAACAGC  
CAACTGAAGCAAATGTGCGATTGGCACTTAAAGATTGAGAAAAAGCCTCTGAGGGTGCCTAGTGGTTACTTC  
TAGAGATGTTGAAGAACCATCCATGAAGGGTCAATGGCAAGAGGAGAGTTACAATTGGCCGGTCTGTCTGG  
AGACCAACCAGAGTCTTCTATACTCGGAACGAGGAAATAGAGTCATTAGAGCAATTCCACATGGCAACGGCT  
AGTTCGTTAATTCGGAAACAGATGAGTTCGATTGTGTACACGGGCCCCATTAAAGTTCAGCAAATGAAAACT  
TTATTGATAGCCTGGTAGCATCACTCTCTGCTGCGGTGTCGAACCTAGTCAAGATCCTAAAGGATACAGCTGCT  
ATAGATCTCGAAACCCGTCAGAAGTTTGGAGTCTTAGATGTTGCGACCAAAGATGGTTAATTAACCTTTAG  
CCAAGAATCACGCATGGGGCGTTATTGAAACACATGCTAGGAAGTACCACGTTGCACTTTTGGAGTATGATGA  
GCATGGAGTGGTAAGTTCGACAGTTGGAGAAGGGTGGCCGTGAGTTCTGAGTCAATGGTTTATTCTGATAT  
GGCAAAGCTCAGAACACTGAGGAGATTATTAAGAGATGGTGAGCCTCATGTCAGCAGTGCTAAAGTCGTCT  
AGTTGACGGTGTCCCGGGTGTGGAAAAGACAAAAGAGATTCTCTCGAAAGTAAATTTTGGAGGAAGATCTAAT  
CTTAGTACCGGTAAAGCAGGCTGCTGAAATGATAAAGAGGCGTGCTAATGCGTCAGGAATAATTCAAGCCAC  
AAGAGATAATGTTCTGACTGTTGATTCAATTATAATGAATTACGGTAAAGGAACACGCTGTCAGTTCAAAAGG  
TTATTTATCGACGAAGGTCTGATGTTGCACACTGGTTGTGTGAATTTCTTGTTTCTATGTCTCTGTGCGAAAT  
GCATATGTTTATGGAGACACACAACAAATTCCATACATCAACAGAGTATCCGGTTTTCCGTACCCTGCACATTT  
TGCAAAAATAGAGGTTGATGAGGTGGAACTCGCAGAACTACGCTGCGTTGTCCAGCCGACATTACCCACTAT  
CTTAACAGAAGGTACGATGGACATGTCATGTGTACATCGTCGGTTAAAAAGTCAGTTTCTCAGGAAATGGTGA  
GCGGGGCCGCAATGATCAATCCTGTATCTAAGCCATTGAATGGGAAAGTTTTGACTTTCACTCAGTCTGATAA  
AGAGGCGCTGCTTCTCGAGGATATACGGACGTCCATACAGTACATGAGGTACAAGGTGAGACATATGCAGA  
TGTGTCGTTGGTCAGATTGACTCCGACACCTGTATCTATCATCGCAGGAGATAGTCCGCACGTTCTCGTAGCTT  
TGTCAAGGCATACCCAAACATTGAAGTATTACACCGTAGTGATGGATCCTCTTGTAAGTATAATTAGGGATTTA  
GAAAACTTAGTTCTTACTTGTTAGATATGTATAAAGTAGATGCAGGGACCCAATAGCAATTACAGGTAGACT  
CCGTGTTTAAAGGTTCTAATCTTTTTGTTGCAGCACCAAGACTGGAGATATCTCAGATATGCAATTTTACTAT  
GATAAGTGTCTCCAGGTAATAGCACCATGTTAAATAACTATGATGCTGTTACCATGAGGTTGACTGACATTTT  
TCTTAATGTCAAAGATTGCATATTGGATTTCTCTAAGTCTGTGGCTGCACCGAAGGATCCGATCAAACCACTGA  
TTCCAATGGTACGAACGGCGGCAGAAATGCCACGCCAGACTGGACTATTGGAAAATTTGGTGGCGATGATCA  
AAAGAACTTTAATTCACCGGAGTTATCAGGAATAATCGACATTGAGAATACTGCATCTTTAGTAGTAGATAA  
ATTTTTGATAGTTACTTGCTTAAAGAAAAAGAAAACCAAATAAAAATGTTTCTTTATTTTGTAGAGAGTCTCT  
CAATAGATGGTTAGAGAAGCAGGAGCAAGTGACCATTGGTCAGCTTGCAGATTTTGATTTTGTGGATCTTCCT  
GCCGTTGATCAGTACAGGCATATGATTAAGCGCAACCTAAGCAGAAGCTGGATACATCAATTCAAAGCGAAT  
ATCCGGCCTTGACAGACGATTGTGTATCATTGAAAAAGATCAACGCAATCTTCGGTCCTTTGTTCAAGTGAGCTC

ACAAGGCAAATGCTCGAAAGCATAGACTCAAGTAAGTTTTTGTCTTTACAAGGAAGACGCCAGCTCAAATTG  
AGGATTTCTTCGGAGATCTCGATAGCCATGTCCCTATGGATATCTTGAGTTGGATATTTGGAAGTATGACAAA  
TCTCAGAACGAGTTCCACTGTGCAGTAGAGTATGAAATATGGAGAAGACTTGGATTAGAAGATTTTCTGGGA  
GAAGTTTGAAAACAAGGCCACAGAAAACTACTCTTAAAGATTACACAGCTGGTATTAACCGTGTATGTTAGGT  
ACCAGAGAAAAGAGTGGGGACGTTACAACATTCATCGGTAATACGGTGATTATTGCTGCTTGTAGCTTCCAT  
GTTGCCCATGGAGAAAATAATCAAAGGTGCATTTTTCGGGAGATGACAGTTTACTATACTTCCAAAAGGTTGT  
GAGTTTCTGACATACAGCATACAGCCAACCTTATGTGGAATTTTCGAGGCTAAGCTATTCAGAAAGCAGTATG  
GTTATTTCTGTGGAAGGTACGTGATACATCATGACAGAGGGTGTATTGTTTATTATGACCTTTGAAGTTGATT  
TCTAACTTGGTGCTAAACATATCAAGGATTGGGATCACTTAGAAGAGTTCAGAAGATCCCTTTGTGATGTTG  
CAAATTCGTTGAACAACTGTGCGTATTACACGCAGTTGGACGACGCTGTGAGTGAGGTCCATAAAACCGCACC  
CCCGGGTTCGTTTGTATATAAAAGTTTGTAAATATCTGTCCGATAAGGTTCTTTTAGAAGTTTGTATAGA  
TGGCTCTTGTAAAGGGTAAAGTTAATATTAATGAGTTCATAGACTTGTCAAATCAGAAAAATTTCTTCCGTCT  
ATGTTACACCTGTTAAGAGTGTGATGATCTCAAGGTTGATAAGATATTGGTTCATGAAGATGAATCTTGTG  
CGAAGTCAATTTACTTAAAGGTGTAAACTCATTGATGGTGGCTATGTACATCTTGTGCTGCTTGTGGTGACA  
GGTGAATGGAATTTGCCAGATAATTGTCGTGGTGGTGTGAGTGTCTGTTTGGTCGATAAGAGAATGGAGAGA  
GCGGACGAGGCAACTCTGCTTCACTATACCGCAGCGGCTAAGAAAAGGTTTCAGTTCAAAGTCGTTCCAA  
ATTACAACATCACTACCAAGGACGCAGAAAAGGCAGTTTGGCAAGTACTAGTTAATATTAGAAATGTTAAAT  
TGCTGCGGGTACTGTCCGCTGTCATTAGAATTTGTGTGAGTGTGATTGTTTATAAAAAATATTATAAACTCG  
GTTTGAGAGAGAAAATTACGAGCGTCACGGATGGAGGGCCCATGGAAGTATCAGAAGAAGTTGTTGATGAG  
TTCATGGAAGAAGTCCCGATGTCTGTAAGGCTTGCAAAATTTGTTTCGAAGACCGGAAAAAGTTTAGTAGTA  
AAAGTGAGAATAATAGTGGTAATAATAGGCCGAAACCAACAAAAACCAAGGAAGGAAAAGGGTTAAAA  
GTTAGGGTTGAGAAGGATAATTTAATTGATAATGAATTGGAGACTTACGTCGCCGATTGAGATTCGTATTAAA  
TATGTCTTACACAATCGCAACTCCATCGCAATTTGTGTTTTTGTATCAGCATGGGCCGACCCTATAGAATTAAT  
AAATTTATGTACTAATTCAGTGAATCAGTTCCAAACACAACAAGCTAGAACAACCGTTCAACGGCAATTTA  
GCGAAGTGTGGAACCTGTCCCTCAAGTCACTGTTAGGTTTCTGACAGTGGTTTAAAGGTGTATAGGTACAA  
TGCGGTACTAGATCCTCTAGTTACTGCTTTGTAGGAGCTTCGATACTAGAAATAGGATTATAGAAGTCGAAA  
ATCAGGCGAACCCGACAACCGCCGAAACGTTAGACGCTACTCGTAGAGTAGATGACGCAACGGTGGCTATAA  
GGAGCGCTATAAATAATTTAGTAGTAGAATTGGTCAAAGGAACAGGTTTGTACAATCAGAGCACTTTTGAAAG  
TGCATCCGGTTTACAATGGTCTCTGCACCTGCATCTTGA

#MT118666

1

ATGGCATACACACAGACAGCTACCACATCCGCTTTGCTCGACACTGTCCGAGGTAACAATACCTTGGTCAACG  
ATCTTGCGAAGCGGCGTCTTTATGACACAGCGGTGACGAGTTCAACGCTCGTGATCGCAGGCCCAAAGTAA  
ATTTTCCAAAGTAATAAGTGAGGAACAGACGCTTATTGCTACTAGGGCATATCCAGAATTCAGATAACCTTC  
TATAATACGCAGAACGCCGTGCATTGCTTCCGCGTGGACTACGATCCTTAGAACTGGAATATCTAATGATGC  
AGATCCCGTACGGATCACTCACATATGATATAGGTGGGAATTTGCATCTCATCTGTTCAAAGGACGGGCATA  
TGTTCACTGCTGTATGCCAATCTTGATGTCCGCGACATAATGCGGCACGAAGGCCAGAAAGACAGTATAGAA  
TTATACCTTTCCAGGCTTGAGCGGGGCAACAAAGTTGTCCCAAATTTCCAAAAGGAAGCTTTTGACAGATACG  
CTGAAACGCCAGACGAAGTTGTCTGTACAGTACCTTCCAAACGTGTACGCACCAGCAGGTGGAAAACACAG  
GCAGGGTGTATGCTATTGCATTGCACAGTATATACGATATACCTGCTGATGAATTCGGAGCGGCACTTTTAAG  
GAAAAATGTCCATGTTTGTACGCCGCTTCCACTTTTCCGAGAATTTACTTCTCGAAGATTCACACGTCAACCT  
TGACGAAATCAACGCGTGTTCGCGTGATGGAGACAAGCTGACTTTTCTTTCGCATCTGAGAGCACTTTAA  
ATTATTGTCATAGTTATTCTAATATTTTAAAAATACGTGTGCAAACTTACTTCCCGGCATCTAATAGAGAGGTCT

ACATGAAGGAGTTTTTGGTCACCAGGGTTAACACCTGGTTTTGTAAGTTTTCTAGGATAGATACTTTTTTATTAT  
ACAAGGGGGTAGCCCAAAAGGTGTAAATAGTGAGCAATTTTACAGCGCAATGGAAGATGCATGGCACTACA  
AAAAGACTCTTGCAATGTGTAAACAGCGAGAGGATTCTTCTGAAGATTCTCATCGGTCAATTACTGGTCCCA  
AAAATGAGAGATATGGTCATAGTTCTCTATTGACATATCTCTCGACACCAGTAAAAGGACCCGCAAAGAAG  
TCTTAGTGTCAAAGGATTTTGTATTACAGTTTTAAATCACATTGCACTTATCAAGCCAAGGCACTTACATACT  
CCAATGTTTTATCCTTTGTGCAATCAATTCGTTCAAGGGTAATTATCAACGGAGTGACTGCCAGGTCTGAGTGG  
GATGTTGACAAATCTTTTTGCAATCCTTGTCATGACATTTTTCTGCATACTAAGCTTGCCGTTTTAAAAGAC  
GAATTGTTAATCAGCAAGTTTAGTTTGGGGCCAAAATCAGTAAGCCAGCATGTATGGGATGAGATTTCCCTGG  
CTTTTGAAACGCATTTCCATCGATCAAGGAGAGACTGCTAAATCGGAACTAATTAAGTGTCGGGAGACGC  
ATTAGAAATCAGGGTGCCTGATTTATATGTGACTTTTCACGATAGATTAGTGACTGAGTACAAAACATCGGTG  
GATATGCCAGTGCTTGATATCAGAAAGAGAATGGAGGAGACTGAGGTTATGTACAATGCATTGTCTGAGCTA  
TCTGTGCTCAAGGAGTCGGACAAGTTCGACGTTGATGTTTTTTCCCGGATGTGCCAGACTTTGGAGGTAGACC  
CAATGACTGCAGCAAAGGTTATTGTGGCAGTGATGAGCAACGAGAGCGGACTGACTCTTACATTCGAACAGC  
CAACTGAAGCAAATGTGCGATTGGCACTTAAAGATTGAGAAAAAGCCTCTGAGGGTGCCTAGTGGTTACTTC  
TAGAGATGTTGAAGAACCATCCATGAAGGGTCAATGGCAAGAGGAGAGTTACAATTGGCCGGTCTGTCTGG  
AGACCAACCAGAGTCTTCTATACTCGGAACGAGGAAATAGAGTCATTAGAGCAATTCACATGGCAACGGCT  
AGTTCGTTAATTCGGAAACAGATGAGTTCGATTGTGTACACGGGCCCCATTAAAGTTCAGCAAATGAAAACT  
TTATTGATAGCCTGGTAGCATCACTCTCTGCTGCGGTGTCGAACCTAGTCAAGATCCTAAAGGATACAGCTGCT  
ATAGATCTCGAAACCCGTCAGAAGTTTGGAGTCTTAGATGTTGCGACCAAAGATGGTTAATTAACCTTTAG  
CCAAGAATCACGCATGGGGCGTTATTGAAACACATGCTAGGAAGTACCACGTTGCACTTTTGGAGTATGATGA  
GCATGGAGTGGTAAGTTCGACAGTTGGAGAAGGGTGGCCGTGAGTCTGAGTCAATGGTTTATTCTGATAT  
GGCAAAGCTCAGAACACTGAGGAGATTATTAAGAGATGGAGAGCCTCATGTCAGCAGTGCTAAAGTCGTCTT  
AGTTGACGGTGTCCCGGTTGTGGAAAGACAAAAGAGATTCTCTCGAAAGTAAATTTTGGAGGAAGATCTAAT  
CTTAGTACCGGTAAGCAGGCTGCTGAAATGATAAAGAGGCGTGCTAATGCGTCAGGAATAATTCAAGCCAC  
AAGAGATAATGTTCTGACTGTTGATTCAATTATAATGAATTACGGTAAAGGAACACGCTGTCAGTTCAAAGG  
TTATTTATCGACGAAGGTCTGATGTTGCACACTGGTTGTGTGAATTTCTTGTCTATGTCTCTGTGCGAAATT  
GCATATGTTTATGGAGACACACAACAAATTCCATACATCAACAGAGTATCCGGTTTTCCGTACCCTGCACATTT  
TGCAAAAATAGAGTTGATGAGGTGGAACTCGCAGAACTACGCTGCGTTGTCCAGCCGACATTACCCACTAT  
CTTAACAGAAGGTACGAAGGACATGTCATGTGTACATCGTCGGTTAAAAAGTCAGTTTCTCAGGAAATGGTGA  
GCGGGGCCGCAATGATCAATCCTGTATCTAAGCCATTGAATGGGAAAGTTTTGACTTTCACTCAGTCTGATAA  
AGAGGCGCTGCTTCTCGAGGATATACGGACGTCCATACAGTACATGAGGTACAAGGTGAGACATATGCAGA  
TGTGTCGTTGGTCAGATTGACTCCGACACCTGTATCTATCATCGCAGGAGATAGTCCGCACGTTCTCGTAGCTT  
TGTCAGGCATACCCAAACATTGAAGTATTACACCGTAGTGATGGATCCTCTTGTAAGTATAATTAGGGATTGA  
GAAAACTTAGTTCTTACTTGTTAGATATGTATAAAGTAGATGCAGGGACCCAATAGCAATTACAGGTAGACT  
CCGTGTTTAAAGGTTCTAATCTTTTTGTTGCAGCACCAAAGACTGGAGATATCTCAGATATGCAATTTTACTAT  
GATAAGTGTCTCCAGGTAATAGCACCATGTTAAATAACTATGATGCTGTTACCATGAGGTTGACTGACATTTT  
TCTTAATGTCAAAGATTGCATATTGGATTTCTCTAAGTCTGTGGCTGCACCGAAGGATCCGATCAAACCACTGA  
TTCCAATGGTACGAACGGCGGCAGAAATGCCACGCCAGACTGGACTATTGGAAAATTTGGTGGCGATGATCA  
AAAGAACTTTAATTCACCGGAGTTATCAGGAATAATCGACATTGAGAATACTGCATCTTTAGTAGTAGATAA  
ATTTTTGATAGTTACTTGCTTAAAGAAAAAGAAAAACCAAATAAAAATGTTTCTTTATTTTGTAGAGAGTCTCT  
CAATAGATGGTTAGAGAAGCAGGAGCAAGTGACCATTGGTCAGCTTGCGAGTTTTGATTTTGTGGATCTTCTT  
GCCGTTGATCAGTACAGGCATATGATTAAGCGCAACCTAAGCAGAAGCTGGATACATCAATTCAAAGCGAAT  
ATCCGGCCTTGACAGACGATTGTGTATCATTCGAAAAAGATCAACGCAATCTTCGGTCTTTGTTTCACTGAGCTC  
ACAAGGCAAATGCTCGAAAGCATAGACTCAAGTAAGTTTTTGTCTTTACAAGGAAGACGCCAGCTCAAATTG  
AGGATTTCTTCGGAGATCTCGATAGCCATGTCCCTATGGATATCTTGAGTTGGATATTTTGAAGTATGACAAA  
TCTCAGAACGAGTTCCACTGTGCAGTAGAGTATGAAATATGGAGAAGACTTGGATTAGAAGATTTTCTGGGA  
GAAGTTTGAAACAAGGCCACAGGAAAACTACTCTTAAAGATTACACAGCTGGTATTAAACGTGTTTATGGT  
ACCAGAGAAAGAGTGGGGACGTTACAACATTCATCGGTAATACGGTGATTATTGCTGCTTGTTTAGCTTCCAT



GTTGCCCATGGAGAAAATAATCAAAGGTGCATTTTGC GGAGATGACAGTTTACTATACTTCCAAAAGGTTGT  
GAGTTTCTGACATACAGCATACAGCCAACCTTATGTGGAATTTGAGGCTAAGCTATTCAGAAAGCAGTATG  
GTTATTTCTGTGGAAGGTACGTGATACATCATGACAGAGGGTGTATTGTTTATTATGACCCTTTGAAGTTGATT  
TCTAAACTTGGTGCTAAACACATCAAGGATTGGGATCACTTAGAAGAGTTCAGAAGATCCCTTTGTGATGTTG  
CAAATTCGTTGAACAACTGTGCGTATTACACGCAGTTGGACGACGCTGTGAGTGAGGTCCATAAAACCGCACC  
CCCGGGTTCGTTTGTATATAAAAGTTTAGTTAAATATCTGTCCGATAAGGTTCTTTTGTAGAAAGTTGTTTATAGA  
TGGCTCTTGTTAAGGGTAAAGTCAATATTAATGAGTTCATAGACTTGTCAAATCAGAAAAATTTCTTCCGTCT  
ATGTTACACCTGTTAAGAGTGTCTGATCTCCAAGGTTGATAAGATATTGGTTCATGAAGATGAATCTTTGTC  
CGAAGTCAATTTACTCAAAGGTGTAAACTCATTGATGGTGGCTATGTACATCTTGCTGGTCTTGTTGGTGACA  
GGTGAATGGAATTTGCCAGATAATTGTCGTGGTGGTGTGAGTGTCTGTTTGGTCGATAAGAGAATGGAGAGA  
GCGGACGAGGCAACTCTTGCTTCATACTATACCGCAGCGGCTAAGAAAAGGTTTCAGTTCAAAGTCGTTCCAA  
ATTACAACATCACTACCAAGGACGCAGAAAAGGCAGTTTGGCAAGTACTAGTTAATATTAGAAATGTTAAAT  
TGCTGCGGGTACTGTCCGCTGTCATTAGAATTTGTGTGAGTGTGTATTGTTTATAAAAATATTATAAACTCG  
GTTTGAGAGAGAAAATTACGAGCGTCACGGATGGAGGGCCCATGGAAGTATCAGAAGAAGTTGTTGATGAG  
TTCATGGAAGAAGTCCCGATGTCTGTAAGGCTTGCAAAATTTGTTTGAAGACCGGAAAAAAGTTTAGTAGTA  
AAAGTGAGAATAATAGTGGTAATAATAGGCCGAAACCAACAAAAACCAAGGAAGGAAAAGGGTTTAAAA  
GTTAGGGTTGAGAAGGATAATTTAATTGATAATGAATTGGAGACTTACGTCGCCGATTGAGATTGCTATTAAA  
TATGTCTTACACAATCGCAACTCCATCGCAATTTGTGTTTTTGTATCAGCATGGGCCGACCCTATAGAATTAAT  
AAATTTATGTACTAATTCAGTGTCCAAACACAACAAGCTAGAACAAACCGTTCAACGGCAATTTA  
GCGAAGTGTGGAAACCTGTCCCTCAAGTCACTGTTAGGTTTCTGACAGTGGTTTAAAGGTGTATAGGTACAA  
TGCGGTACTAGATCCTCTAGTTACTGCTTTGTTAGGAGCTTCGATACTAGAAATAGGATTATAGAAGTCGAAA  
ATCAGGCGAACCCGACAACCGCCGAAACGTTAGACGCTACTCGTAGAGTAGATGACGCAACGGTGGCTATAA  
GGAGCGCTATAAATAATTTAGTAGTAGAATTGGTCAAAGGAACAGGTTTGTACAATCAGAGCACATTTGAAA  
GTGCATCCGGTTTACAATGGTCCTCTGCACCTGCATCTTGA

#MW314091

1

ATGGCATACACACAGACAGCTACCACATCCGCTTTGCTCGACACTGTCCGAGGTAACAATACCTTGGTCAACG  
ATCTTGCGAAGCGGCGTCTTTATGACACAGCGGTGACGAGTTCAACGCTCGTGATCGCAGGCCCAAAGTAA  
ATTTTCCAAAGTAATAAGTGAGGAACAGACGCTTATTGCTACTAGGGCATATCCAGAATTCAGATAACCTTC  
TATAATACGCAGAACGCCGTGCATTGCTTGGCGGTGGACTACGATCCTTAGAACTGGAATATCTAATGATGC  
AGATCCCGTACGGATCACTCACATATGATATAGGTGGGAATTTGCATCTCATCTGTTCAAAGGACGGGCATA  
TGTTCACTGCTGTATGCCAATCTTGATGTCCGCGACATAATGCGGCACGAAGGCCAGAAAGACAGCATAGAA  
TTATACCTTTCCAGGCTTGAGCGGGGCAACAAAGTTGTCCCAAATTTCCAAAAGGAAGCTTTTGACAGATACG  
CTGAAACGCCAGACGAAGTTGTCTGTACAGTACCTTCCAAACGTGTACGCACCAGCAGGTGGAAAACACAG  
GCAGGGTGTATGCTATTGCATTGCACAGTATATACGATATACCTGCTGATGAATTCGGAGCGGCACTTTTAA  
GAAAAATGTCCATGTTTGTACGCCGCTTCCACTTTTCCGAGAATTTACTTCTCGAAGATTCACACGTCAACCT  
TGACGAAATCAACGCGTGTGTTTTCGCGTGATGGAGACAAGCTGACTTTTCTTTCGCATCTGAGAGCACTTTAA  
ATTATTGTCATAGTTATTCTAATATTTTAAAAATACGTGTGCAAACTTACTTCCCGGCATCTAATAGAGAGGTCT  
ATATGAAGGAGTTTTTGGTCACCAGGGTTAACACCTGGTTTTGTAAGTTTTCTAGGATAGATACTTTTTATTAT  
ACAAGGGGGTAGCCCAAAAGGTGTAAATAGTGAGCAATTTTACAGCGCAATGGAAGATGCATGGCACTACA  
AAAAGACTCTTGCAATGTGTAAACAGCGAGAGGATTCTTCTGAAGATTCCTCATCGGTCAATTACTGGTCCCA  
AAAATGAGAGATATGGTCATAGTTCTCTATTGACATATCTCTGACACCAGTAAAAGGACCCGCAAGAAG  
TCTTAGTGTCAAAGGATTTTGTATTACAGTTTTTAAATCACATTCGCACTTATCAAGCCAAGGCACTTACATACT

CCAATGTTTTATCCTTTGTCGAATCAATTCGTTCAAGGGTAATTATCAACGGAGTGACTGCCAGGTCTGAGTGG  
GATGTTGACAAATCTCTTTTGAATCCTTGTCATGACATTTTTCTGCATACTAAGCTTGCCGTTTTAAAGAC  
GAATTGTTAATCAGCAAGTTTAGTTTGGGGCCAAAATCAGTAAGCCAGCATGTATGGGATGAGATTTCCCTGG  
CTTTTGAAACGCATTTCCATCGATCAAGGAGAGACTGCTAAATCGGAACTAATTAAGTGTCTGGGAGACGC  
ATTAGAAATCAGGGTGCCTGATTTATATGTGACTTTTCACGATAGATTAGTGACTGAGTACAAAACATCGGTG  
GATATGCCAGTGCTTGATATCAGAAAGAGAATGGAGGAGACTGAGGTTATGTACAATGCATTGTCTGAGCTA  
TCTGTGCTCAAGGAGTCGGACAAGTTCGACGTTGATGTTTTTTCCCGGATGTGCCAGACTTTGGAGGTAGACC  
CAATGACTGCAGCAAAGGTTATTGTGGCAGTGATGAGCAACGAGAGCGGACTGACTCTTACATTCGAACAGC  
CAACTGAAGCAAATGTCTGATTGGCACTTAAGATTAGAAAAAGCCTCTGAGGGTGCAGTAGTGGTTACTTC  
TAGAGATGTTGAAGAACCATCCATGAAGGGTCAATGGCAAGAGGAGAGTTACAATTGGCCGGTCTGTCTGG  
AGACCAACCAGAGTCTTCTATACTCGGAACGAGGAAATAGAGTCATTAGAGCAATTCACATGGCAACGGCT  
AGTTCGTTAATTCGGAAACAGATGAGTTCGATTGTGTACACGGGCCCATTAAGTTCAGCAAATGAAAACT  
TTATTGATAGCCTGGTAGCATCACTCTCTGCTGCGGTGTGCAACCTAGTCAAGATCCTAAAGGATACAGCTGCT  
ATAGATCTCGAAACCCGTCAGAAGTTTGGAGTCTTAGATGTTGCGACCAAAGATGGTTAATTAACCTTTAG  
CCAAGAATCACGCATGGGGCGTTATTGAAACACATGCTAGGAAGTACCACGTTGCACTTTTGGAGTATGATGA  
GCATGGAGTGGTAACTTGCACAGTTGGAGAAGGGTGGCCGTGAGTCTGAGTCAATGGTTTATTCTGATAT  
GGCAAAGCTCAGAACACTGAGGAGATTATTAAGAGATGGTGAGCCTCATGTCAGCAGTGCTAAAGTCGTCT  
AGTTGACGGTGTCCCGGTTGTGGAAAGACAAAAGAGATTCTCTCGAAAGTAAATTTGAGGAAGATCTAAT  
CTTAGTACCGGTAAGCAGGCTGCTGAAATGATAAAGAGGCGTGCTAATGCGTCAGGAATAATTCAAGCCAC  
AAGAGATAATGTTCTGACTGTTGATTCAATTATAATGAATTACGGTAAAGGAACACGCTGTCAGTTCAAAAGG  
TTATTTATCGACGAAGGTCTGATGTTGCACACTGGTTGTGTGAATTTCTTGTCTATGTCTCTGTGCGAAATT  
GCATATGTTTATGGAGACACACAACAAATTCCATACATCAACAGAGTATCCGGTTTTCCGTACCCTGCACATTT  
TGCAAAAATAGAGTTGATGAGGTGGAACTCGCAGAACTACGCTGCGTTGTCCAGCCGACATTACCCACTAT  
CTTAACAGAAGGTACGAAGGATATGTCATGTGTACATCGTCGGTTAAAAAGTCAGTTTCTCAGGAAATGGTGA  
GCGGGGCCGAATGATCAATCCTGTATCTAAGCCATTGAATGGGAAAGTTTGACTTTCACTCAGTCTGATAA  
AGAGGCGCTGCTTCTCGAGGATATACGGACGTCCATACAGTACATGAGGTACAAGGTGAGACATATGCAGA  
TGTGTCGTTGGTCAGATTGACTCCGACACCTGTATCTATCATCGCAGGAGATAGTCCGCACGTTCTCGTAGCTT  
TGTCAAGGCATACCCAAACATTGAAGTATTACACCGTAGTGATGGATCCTCTTGTAAGTATAATTAGGGATTGA  
GAAAACTTAGTTCTTACTTGTTAGATATGTATAAAGTAGATGCAGGGACCCAATAGCAATTACAGGTAGACT  
CCGTGTTTAAAGTTCTAATCTTTTTGTTGCAGCACCAAGACTGGAGATATCTCAGATATGCAATTTTACTAT  
GATAAGTGTCTCCAGGTAATAGCACCATGTTAAATACTATGATGCTGTTACCATGAGGTTGACTGACATTTCT  
TCTAATGTCAAAGATTGCATATTGGATTTCTCTAAGTCTGTGGCTGCACCGAAGGATCCGATCAAACCACTGA  
TTCCAATGGTACGAACGGCGGCAGAAATGCCACGCCAGACTGGACTATTGGAAAATTTGGTGGCGATGATCA  
AAAGAACTTTAATTCACCGGAGTTATCAGGAATAATCGACATTGAGAATACTGCATCTTTAGTAGTAGATAA  
ATTTTTGATAGTTACTTGCTTAAAGAAAAAAGAAAAACCAATAAAAAATGTTTCTTTATTTGTAGAGAGTCTCT  
CAATAGATGGTTAGAGAAGCAGGAGCAAGTGACCATTGGTCAGCTTGCGAGTTTTGATTTTGTGGATCTTCCT  
GCCGTTGATCAGTACAGGCATATGATTAAGCGCAACCTAAGCAGAAGCTGGATACATCAATTCAAAGCGAAT  
ATCCGGCCTTGCGAGACGATTGTGTATCATTCGAAAAAGATCAACGCAATCTTCGGTCTTTGTTTCAGTGAGCTC  
ACAAGGCAAATGCTCGAAAGCATAGACTCAAGTAAGTTTTTGTCTTTACAAGGAAGACGCCAGCTCAAATTG  
AGGATTTCTTCGGAGATCTCGATAGCCATGTCCCTATGGATATCTTGAGTTGGATATTTGGAAGTATGACAAA  
TCTCAGAACGAGTTCCACTGTGCAGTAGAGTATGAAATATGGAGAAGACTTGGATTAGAAGATTTTCTGGGA  
GAAGTTTGAAACAAGGCCACAGGAAACTACTCTTAAAGATTACACAGCTGGTATTAAACGTGTTTATGGT  
ACCAGAGAAAAGAGTGGGGACGTTACAACATTATCGGTAATACGGTGATTATTGCTGCTTGTTAGCTCCAT  
GTTGCCCATGGAGAAAATAATCAAAGGTGCATTTTTCGGAGATGACAGTTTACTATACTTCCAAAAGGTTGT  
GAGTTTCTGACATACAGCATACAGCCAACCTTATGTGGAATTTTCAGGCTAAGCTATTCAGAAAGCAGTATG  
GTTATTTCTGTGGAAGGTACGTGATACATCATGACAGAGGGTGTATTGTTTATTATGACCTTTGAAGTTGATT  
TCTAACTTGGTGCTAAACACATCAAGGATTGGGATCACTTAGAAGAGTTCAGAAGATCCCTTTGTGATGTTG  
CAAATTCGTTGAACAACTGTGCGTATTACACGCAGTTGGACGACGCTGTGAGTGAGGTCCATAAAACCGCAC

CCCGGGTTCGTTTGTATATAAAAGTTTAGTTAAATATCTGTCCGATAAGGTTCTTTTTAGAAGTTTGTATAGA  
TGGCTCTTGTTAAGGGTAAAGTCAATATTAGTGAGTTCATAGACTTGTCAAAATCAGAAAAATTTCTCCGTCT  
ATGTTACACCTGTTAAGAGTGTCTGATCTCCAAGGTTGATAAGATATTGGTTCATGAAGATGAATCTTTGTC  
CGAAGTCAATTTACTCAAAGGTGTAAACTCATTGATGGTGGCTATGTACATCTTGCTGGTCTTGTTGGTGACA  
GGTGAATGGAATTTGCCAGATAATTGTCGTGGTGGTGTCTGAGTGTCTGTTTGGTCGATAAGAGAATGGAGAGA  
GCGGACGAGGCAACTCTTGATCATACTATACCGCAGCGGCTAAGAAAAGGTTTCAGTTCAAAGTCGTTCCAA  
ATTACAACATCACTACCAAGGACGCAGAAAAGGCAGTTTGGCAAGTACTAGTTAATATTAGAAATGTTAAAT  
TGCTGCGGGTACTGTCCGCTGTCATTAGAATTTGTGTGAGTGTGTATTGTTTATAAAAATATTATAAACTCG  
GTTTGAGAGAGAAAATTACGAGCGTCACGGATGGAGGGCCCATGGAAGTATCAGAAGAAGTTGTTGATGAG  
TTCATGGAAGAAGTCCCGATGTCTGTAAGGCTTGCAAAATTTCTGTTTGAAGACCGGAAAAAAGTTTAGTAGTA  
AAAGTGAGAATAATAGTGGTAATAATAGGCCGAAACCAGACAAAAACCAAGGAAGGAAAAAGGGTTTAAAA  
GTTAGGGTTGAGAAGGATAATTTAATTGATAATGAATTGGAGACTTACGTCGCCGATTGAGATTGCTATTAAA  
TATGTCTTACACAATTGCAACTCCATCGCAATTTGTGTTTTTGTCTCAGCATGGGCCGACCCTATAGAATTAAT  
AAATTTATGTACTAATTCAGTGTCCAAACACAACAAGCTAGAACAAACCGTTCAACGGCAATTTA  
GCGAAGTGTGGAAACCTGTCCCTCAAGTCACTGTTAGGTTTCTGACAGTGGTTTAAAGGTGTATAGGTACAA  
TGCGGTACTAGATCCTCTAGTTACTGCTTTGTTAGGAGCTTTCGATACTAGAAATAGGATTATAGAAGTCGAAA  
ATCAGGCGAACCCGACAACCGCCGAAACGTTAGACGCTACTCGTAGAGTAGATGACGCAACGGTGGCTATAA  
GGAGCGCTATAAATAATTTAGTAGTAGAATTGGTCAAAGGAACAGGTTTGTACAATCAGAGCACATTTGAAA  
GTGCATCCGGTTTACAATGGTCCTCTGCACCTGCATCTTGA

#MW314092

1

ATGGCATACACACAGACAGCTACCACATCCGCTTTGCTCGACACTGTCCGAGGTAACAATACCTTGGTCAACG  
ATCTTGCGAAGCGGCGTCTTTATGACACAGCGGTCGACGAGTTCAACGCTCGTGATCGCAGGCCCAAAGTAA  
ATTTTTCCAAAGTAATAAGTGAGGAACAGACGCTTATTGCTACTAGGGCATATCCAGAATTCAGATAACCTTC  
TATAATACGCAGAACGCCGTGCATTGCTTGCCGGTGGACTACGATCCTTAGAACTGGAATATCTAATGATGC  
AGATCCCGTACGGATCACTCACATATGATATAGGTGGGAATTTGATCTCATCTGTTCAAAGGACGGGCATA  
TGTTCACTGCTGTATGCCAATCTTGATGTCCGCGACATAATGCGGCACGAAGGCCAGAAAGACAGTATAGAA  
TTATACCTTTCCAGGCTTGAGCGGGGCAACAAAGTTGTCCCAAATTTCCAAAAGGAAGCTTTTGACAGATACG  
CTGAAACGCCAGACGAAGTTGTCTGTACAGTACCTTCCAAACGTGTACGCACCAGCAGGTGGAAAACACAG  
GCAGGGTGTATGCTATTGCATTGCACAGTATATACGATATACCTGCTGATGAATTCGGAGCGGCACTTTTAA  
GAAAAATGTCCATGTTTGTTACGCCGCTTCCACTTTTCCGAGAATTTACTTCTCGAAGATTCACACGTCAACCT  
TGACGAAATCAACGCGTGTTTTTCGCGTGATGGAGACAAGCTGACTTTTTCTTTCGCATCTGAGAGCACTTTAA  
ATTACTGTCATAGTTATTCTAATATTTTAAAATACGTGTGCAAACTTACTTCCCGGCATCTAATAGAGAGGTCT  
ACATGAAGGAGTTTTTGGTCACCAGGGTTAACACCTGGTTTTGTAAGTTTTCTAGGATAGATACTTTTTTATTAT  
ACAAGGGGGTAGCCCAAAAGGTGTAAATAGTGAGCAATTTTACAGCGCAATGGAAGATGCATGGCACTACA  
AAAAGACTCTTGCAATGTGTAAACAGCGAGAGGATTCTTCTGAAGATTCCTCATCGGTCAATTACTGGTCCCA  
AAAATGAGAGATATGGTCATAGTTCTCTATTGACATATCTCTCGACACCAGTAAAAGGACCCGCAAAGAAG  
TCTTAGTGTCAAAGGATTTTGTATTACAGTTTTTAAATCACATTCGCATTATCAAGCCAAGGCACTTACATACT  
CCAATGTTTTATCCTTTGTGCAATCAATTCGTTCAAGGGTAATTATCAACGGAGTGACTGCCAGGTCTGAGTGG  
GATGTTGACAAATCTTTTTGCAATCCTTGCCATGACATTTTTCTTGCTACTAAGCTTGCCGTTTTAAAAGAC  
GAATTGTTAATCAGCAAGTTTAGTTTGGGGCCAAAATCAGTAAGCCAGCATGTATGGGATGAGATTTCCCTGG  
CTTTTGAAACGCATTTCCATCGATCAAGGAGAGACTGCTAAATCGGAACTAATTAAGTGTGGGAGACGC  
ATTAGAAATCAGGGTGCCTGATTTATATGTGACTTTTACGATAGATTAGTGACTGAGTACAAAACATCGGTG

GATATGCCAGTGCTTGATATCAGAAAGAGAATGGAGGAGACTGAGGTTATGTACAATGCATTGTCTGAGCTA  
TCTGTGCTCAAGGAGTCGGACAAGTTTCGACGTTGATGTTTTTTCCCGGATGTGCCAGACTTTGGAGGTAGACC  
CAATGACTGCAGCAAAGGTTATTGTGGCAGTGATGAGCAATGAGAGCGGACTGACTCTTACATTCGAACAGC  
CAACTGAAGCAAATGTGCGATTGGCACTTAAAGATTAGAAAAAGCCTCTGAGGGTGCAGTAGTGGTTACTTC  
TAGAGATGTTGAAGAACCATCCATGAAGGGTTCATGGCAAGAGGAGAGTTACAATTGGCCGGTCTGTCTGG  
AGACCAACCAGAGTCTTCCTATACTCGGAACGAGGAAATAGTGTATTAGAGCAATTCACATGGCAACGGCT  
AGTTCGTTAATTCGGAAACAGATGAGTTCGATTGTGTACACGGGCCCATTAAGTTCAGCAAATGAAAACT  
TTATTGATAGCCTGGTAGCATCACTCTCTGCTGCGGTGTCGAACCTAGTCAAGATCCTAAAGGATACAGCTGCT  
ATAGATCTCGAAACCCGTCAGAAGTTTGGAGTCTTAGATGTTGCGACCAAAGATGGTTAATTAACCTTTAG  
CCAAGAATCACGCATGGGGCGTTATTGAAACACATGCTAGGAAGTACCACGTTGCACTTTTGGAGTATGATGA  
GCATGGAGTGGTAACTTGCGACAGTTGGAGAAGGGTGGCCGTGAGTTCTGAGTCAATGGTTTATTCTGATAT  
GGCAAAGCTCAGAACACTGAGGGGATTATTAAGAGATGGTGAGCCTCATGTCAGCAGTGCTAAAGTCGTCCT  
AGTTGACGGTGTCCCGGGTTGTGGAAAGACAAAAGAGATTCTCTCGAAAGTAAATTTTGAGGAAGATCTAAT  
CTTAGTACCGGTAAGCAGGCTGCTGAAATGATAAAGAGGCGTGCTAATGCGTCAGGAATAATTCAAGCCAC  
AAGAGATAATGTTCTGACTGTTGATTCAATTTATAATGAATTACGGTAAAGGAACACGCTGTCAGTTCAAAAGG  
TTATTTATCGACGAAGGTCTGATGTTGCACACTGGTTGTGTGAATTTCTGTTTCTATGTCTCTGTGCGAAATT  
GCATATGTTTATGGAGACACACAACAAATTCCATACATCAACAGAGTATCCGGTTTTCCGTACCCTGCACATTT  
TGCAAAAATAGAGGTTGATGAGGTGGAACTCGCAGAACTACGCTGCGTTGTCCAGCCGACATTACTCACTAT  
CTTAACAGAAGGTACGAAGGACATGTCATGTGTACATCGTCGGTTAAAAAGTCAGTTTCTCAGGAAATGGTGA  
GCGGGGCCGCAATGATCAATCCTGTATCTAAGCCATTGAATGGGAAAGTTTTGACTTTCACTCAGTCTGATAA  
AGAGGCGCTGCTTCTCGAGGATATACGGACGTCCATACAGTACATGAGGTACAAGGTGAGACATATGCAGA  
CGTGTCGTTGGTCAGATTGACTCCGACACCTGTATCTATCATCGCAGGAGATAGTCCGCACGTTCTCGTAGCTT  
TGTC AAGGCATACCCAAACATTGAAGTATTACACCGTAGTGATGGATCCTCTTGTAAGTATAATTAGGGATTGA  
GAAAACTTAGTTCTTACTTGTTAGATATGTATAAAGTAGATGCAGGGACCCAATAGCAATTACAGGTAGACT  
CCGTGTTTAAAGGTTCTAATCTTTTTGTTGCAGCACAAAGACTGGAGATATCTCAGATATGCAATTTTACTAT  
GATAAGTGCTCTCCAGGTAATAGCACCATGTTAAATACTATGATGCTGTTACCATGAGGTTGACTGACATTTT  
TCTTAATGTCAAAGATTGCATATTGGATTTCTCTAAGTCTGTGGCTGCACCGAAGGATCCGATCAAACCACTGA  
TTCCAATGGTACGAACGGCGGCAGAAATGCCACGCCAGACTGGACTATTGGAAAATTTGGTGGCGATGATCA  
AAAGAACTTCAATTCACCGGAGTTATCAGGAATAATCGACATTGAGAATACTGCATCTTTAGTAGTAGATAA  
ATTTTTGATAGTTACTTGCTTAAAGAAAAAGAAAACCAAATAAAAATGTTTCTTTATTTGTAGAGAGTCTCT  
CAATAGATGGTTAGAGAAGCAGGAGCAAGTGACCATTGGTCAGCTTGCGAGTTTTGATTTTGTGGATCTTCCT  
GCCGTTGATCAGTACAGGCATATGATTAAGCGCAACCTAAGCAGAAGCTGGATACATCAATTCAAAGCGAAT  
ATCCGGCCTTGCGAGCAGATTGTGTATCATTCGAAAAAGATCAACGCAATCTTCGGTCCTTTGTTCAAGTACGCTC  
ACAAGGCAAATGCTCGAAAGCATAGACTCAAGTAAGTTTTTGTCTTTACAAGGAAGACGCCAGCTCAAATTG  
AGGATTTCTTCGGAGATCTCGATAGCCATGTCCCTATGGATATCTTGAGTTGGATATTTGCAAGTATGACAAA  
TCTCAGAACGAGTTCCTGTGAGTAGAGTATGAAATATGGAGAAGACTTGGATTAGAAAATTTTCTGGGA  
GAAGTTTGAAACAAGGCCACAGGAAAATACTCTTAAAGATTACACAGCTGGTATTAACGTTGTTTATGGT  
ACCAGAGAAAAGAGTGGGGACGTTACAACATTATCGGTAATACGGTGATTATTGCTGCTTGTTAGCTTCCAT  
GTTGCCCATGGAGAAAATAATCAAAGGTGCATTTTGGGAGATGACAGTTTACTATACTTCCCAAAGGTTGT  
GAGTTTCTGACATACAGCATACAGCCAACCTTATGTGGAATTTGAGGCTAAGCTATTAGAAAAGCAGTATG  
GTTATTTCTGTGGAAGGTACGTGATACATCATGACAGAGGGTGTATTGTTTATTATGACCTTTGAAGTTGATT  
TCTAACTTGGTGCTAAACACATCAAGGATTGGGATCACTTAGAAGAGTTCAGAAGATCCCTTTGTGATGTTG  
CAAATTCGTTGAACAACCTGTGCGTATTACACGCAGTTGGACGACGCTGTGAGTGAGGTCCATAAAACCGCACCC  
CCCGGGTTCGTTTGATATATAAAGTTTGTGTTAAATATCTGTCCGATAAGGTTCTTTTTAGAAAGTTTGTATAGA  
TGGCTCTTGTTAAGGGTAAAGTCAATATTAATGAGTTCATAGACTTGTCAAATCAGAAAAATTTCTCCGTCT  
ATGTTACACCTGTTAAGAGTGTGATCTCCAAGGTTGATAAGATATTGGTTCATGAAGATGAATCTTTGTC  
CGAAGTCAATTTACTCAAAGGTGTAAACTCATTGATGGTGGCTATGTACATCTTGCTGGTCTTGTTGGTGACA  
GGTGAATGGAATTTGCCAGATAATTGTCGTGGTGGTGTGAGTGTCTGTTTGGTCGATAAGAGAATGGAGAGA

GCGGACGAGGCAACTCTTGCTTCATACTATACCGCAGCGGCTAAGAAAAGGTTTCAGTTCAAAGTCGTTCCAA  
ATTACAACATCACTACCAAGGACGCAGAAAAGGCAGTTTGGCAAGTACTAGTTAATATTAGAAATGTTAAAT  
TGCTGCGGGTTACTGTCCGCTGTCATTAGAATTTGTGTCAAGTGTGTATTGTTTATAAAAATATTATAAACTCG  
GTTTGAGAGAGAAAATTACGAGCGTCACGGATGGAGGGCCCATGGAATATCAGAAGAAGTTGTTGATGAG  
TTCATGGAAGAAGTCCCGATGTCTGTAAGGCTTGCAAAATTTCTGTTTGAAGACCGGAAAAAAGTTTAGTAGTA  
AAAGTGAGAATAATAGTGGTAATAATAGGCCGAAACCAACAAAAACCAAGGAAGGAAAAGGGTTTAAAA  
GTTAGGGTTGAGAAGGATAATTTAATTGATAATGAATTGGAGACTTACGTCGCCGATTGAGATTGCTATTAAA  
TATGTCTTACACAATCGCAACTCCATCGCAATTTGTGTTTTTGTATCAGCATGGGCCGACCCTATAGAATTAAT  
AAATTTATGTACTAATTCAGTGTCCAAACACAACAAGCTAGAACAAACCGTTCAACGGCAATTTA  
GCGAAGTGTGGAAACCTGTCCCTCAAGTCACTGTTAGGTTTCTGACAGTGGTTTTAAGGTGTATAGGTACAA  
TGCGGTACTAGATCCTCTAGTTACTGCTTTGTTAGGAGCTTCGATACTAGAAATAGGATTATAGAAGTCGAAA  
ATCAGGCGAACCCGACAACCGCCGAAACGTTAGACGCTACTCGTAGAGTAGATGACGCAACGGTGGCTATAA  
GGAGCGCTATAAATAATTTAGTAGTAGAATTGGTCAAAGGAACAGGTTTGTACAATCAGAGCACATTTGAAA  
GTGCATCCGGTTTACAATGGTCCTCTGCACCTGCATCTTGA

#MW314094

1

ATGGCATACACACAGACAGCTACCACATCCGCTTTGCTCGACACTGTCCGAGGTAACAATACCTTGGTCAACG  
ATCTTGCGAAGCGGCGTCTTTATGACACAGCGGTGCGAGGTTCAACGCTCGTGATCGCAGGCCCAAAGTAA  
ATTTTTCCAAAGTAATAAGTGAGGAACAGACGCTTATTGCTACTAGGGCATATCCAGAATTCAGATAACCTTC  
TATAATACGCAGAACGCCGTGCATTGCTTGCCGGTGGACTACGATCCTTAGAACTGGAATATCTAATGATGC  
AGATCCCGTACGGATCACTCACATATGATATAGGTGGGAATTTGCATCTCATCTGTTCAAAGGACGGGCATA  
TGTTCACTGCTGTATGCCAATCTTGATGTCCGCGACATAATGCGGCACGAAGGCCAGAAAGACAGTATAGAA  
TTATACCTTTCCAGGCTTGAGCGGGGCAACAAAGTTGTCCCAAATTTCCAAAAGGAAGCTTTTGACAGATACG  
CTGAAACGCCAGACGAAGTTGTCTGTACAGTACCTTCCAAACGTGTACGCACCAGCAGGTGGAAAACACAG  
GCAGGGTGTATGCTATTGCATTGCACAGTATATACGATATACCTGCTGATGAATTCGGAGCGGCACTTTTAAG  
GAAAAATGTCCATGTTTGTACGCCGCCTTCCACTTTTCCGAGAATTTACTTCTCGAAGATTCACACGTCAACCT  
TGACGAAATCAACGCGTGTTCGCGCGATGGAGACAAGCTGACTTTTCTTTCGCATCTGAGAGCACTTTAA  
ATTACTGTCATAGTTATTCTAATATTTTAAAATACGTGTGCAAACTTACTTCCCGGCATCTAATAGAGAGGTCT  
ACATGAAGGAGTTTTTGGTCACCAGGGTTAACACCTGGTTTTGTAAGTTTTCTAGGATAGATACTTTTTTATTAT  
ACAAGGGGGTAGCCCAAAAGGTGTAAATAGTGAGCAATTTTACAGCGCAATGGAAGATGCATGGCACTACA  
AAAAGACTCTTGCAATGTGTAAACAGCGAGAGGATTCTTCTGAAGATTCCTCATCGGTCAATTACTGGTCCCA  
AAAATGAGAGATATGGTCATAGTTCTCTATTGACATATCTCTGACACCAGTAAAAGGACCCGCAAAGAAG  
TCTTAGTGTCAAAGGATTTTGTATTACAGTTTTTAAATCACATTCGCACTTATCAAGCCAAGGCACTTACATACT  
CCAATGTTTTATCCTTTGTGCAATCAATTCGTTCAAGGGTAATTATCAACGGAGTGACTGCCAGGTCTGAGTGG  
GATGTTGACAAATCTTTTTGCAATCCTTGTCATGACATTTTTCTTGCATACTAAGCTTGCCGTTTTAAAAGAC  
GAATTGTTAATCAGCAAGTTTAGTTTGGGGCCAAAATCAGTAAGCCAGCATGTATGGGATGAGATTTCCCTGG  
CTTTTGAAACGCATTTCCATCGATCAAGGAGAGACTGCTAAATCGGAACTAATTAAGTGTGCGGAGACGC  
ATTAGAAATCAGGGTGCCTGATTTATATGTGACTTTTACGATAGATTAGTGACTGAGTACAAAACATCGGTG  
GATATGCCAGTGCTTGATATCAGAAAGAGAATGGAGGAGACTGAGGTTATGTACAATGCATTGTCTGAGCTA  
TCTGTGCTCAAGGAGTCGGACAAGTTGACGTTGATGTTTTTCCCGGATGTGCCAGACTTTGGAGGTAGACC  
CAATGACTGCAGCAAAGGTTATTGTGGCAGTGATGAGCAATGAGAGCGGACTGACTCTTACATTGCAACAGC  
CAACTGAAGCAAATGTGCAATTGGCACTTAAAGATTGAGAAAAAGCCTCTGAGGGTGAAGTGGTTACTTC  
TAGAGATGTTGAAGAACCATCCATGAAGGGTTCAATGGCAAGAGGAGAGTTACAATTGGCCGGTCTGTCTGG

AGACCAACCAGAGTCTTCCTATACTCGGAACGAGGAAATAGTGTCAATTAGAGCAATTCACATGGCAACGGCT  
AGTTCGTTAATTCGGAACAGATGAGTTCGATTGTGTACACGGGCCCATTAAGTTCAGCAAATGAAAACT  
TTATTGATAGCCTGGTAGCATCACTCTCTGCTGCGGTGTCGAACCTAGTCAAGATCCTAAAGGATACAGCTGCT  
ATAGATCTCGAAACCCGTCAGAAGTTTGGAGTCTTAGATGTTGCGACCAAAGATGGTTAATTAACCTTTAG  
CCAAGAATCACGCATGGGGCGTTATTGAAACACATGCTAGGAAGTACCACGTTGCACTTTTGGAGTATGATGA  
GCATGGAGTGGTAACTTGCACAGTTGGAGAAGGGTGGCCGTGAGTTCTGAGTCAATGGTTTATTCTGATAT  
GGCAAAGCTCAGAACACTGAGGGGATTATTAAGAGATGGTGAGCCTCATGTCAGCAGTGCTAAAGTCGTCCT  
AGTTGACGGTGTCCCGGGTTGTGGAAAGACAAAAGAGATTCTCTCGAAAGTAAATTTTGAGGAAGATCTAAT  
CTTAGTACCGGGTAAGCAGGCTGCTGAAATGATAAAGAGGCGTGCTAATGCGTCAGGAATAATTCAAGCCAC  
AAGAGATAATGTTCTGACTGTTGATTCAATTTATAATGAATTACGGTAAAGGAACACGCTGTCAAGTTCAAAGG  
TTATTTATCGACGAAGGTCTGATGTTGCACACTGGTTGTGTGAATTTTCTGTTTCTATGTCTCTGTGCGAAATT  
GCATATGTTTATGGAGACACACAACAAATTCATACATCAACAGAGTATCCGGTTTTCCGTACCCTGCACATTT  
TGCAAAAATAGAGGTTGATGAGGTGGAACTCGCAGAACTACGCTGCGTTGCCAGCCGACATTACTCACTAT  
CTTAACAGAAGGTACGAAGGACATGTCATGTGTACATCGTCGGTTAAAAAGTCAGTTTCTCAGGAAATGGTGA  
GCGGGGCCGCAATGATCAATCCTGTATCTAAGCCATTGAATGGGAAAGTTTTGACTTTCACTCAGTCTGATAA  
AGAGGCGCTGCTTCTCGAGGATATACGGACGTCCATACAGTACATGAGGTACAAGGTGAGACATATGCAGA  
CGTGTCGTTGGTCAGATTGACTCCGACACCTGTATCAATCATCGCAGGAGATAGTCCGCACGTTCTCGTAGCTT  
TGTC AAGGCATACCCAAACATTGAAGTATTACCCGTAGTGATGGATCCTCTTGTAAGTATAATTAGGGATTGA  
GAAAACTTAGTTCTTACTTGTTAGATATGTATAAAGTAGATGCAGGGACCCAATAGCAATTACAGGTAGACT  
CCGTGTTTAAAGGTTCTAATCTTTTTGTTGCAGCACCAAGACTGGAGATATCTCAGATATGCAATTTTACTAT  
GATAAGTGCTCTCCAGGTAATAGCACCATGTTAAATACTATGATGCTGTTACCATGAGGTTGACTGACATTTT  
TCTTAATGTCAAAGATTGCATATTGGATTTCTCTAAGTCTGTGGCTGCACCGAAGGATCCGATCAAACCACTGA  
TTCCAATGGTACGAACGGCGGCAGAAATGCCACGCCAGACTGGACTATTGGAAAATTTGGTGGCGATGATCA  
AAAGAACTTCAATTCACCGGAGTTATCAGGAACAATCGACATTGAGAATACTGCATCTTTAGTAGTAGATAA  
ATTTTTGATAGTTACTTGCTTAAAGAAAAAGAAAACCAAATAAAAAATGTTTCTTTATTTGTAGAGAGTCTCT  
CAATAGATGGTTAGAGAAGCAGGAGCAAGTGACCATTGGTCAGCTTGACGATTTTGATTTTGTGGATCTTCCT  
GCCGTTGATCAGTACAGGCATATGATTAAAGCGCAACCTAAGCAGAAGCTGGATACATCAATTCAAAGCGAAT  
ATCCGGCCTTGACAGACGATTGTGTATCATTGAAAAAGATCAACGCAATCTTCGGTCCTTTGTTCAAGTGAGCTC  
ACAAGGCAAATGCTCGAAAGCATAGACTCAAGTAAGTTTTTGTCTTTACAAGGAAGACGCCAGCTCAAATTG  
AGGATTTCTTCGGAGATCTCGATAGCCATGTCCCTATGGATATCTTGAGTTGGATATTTGCAAGTATGACAAA  
TCTCAGAACGAGTTCCACTGTGCAGTAGAGTATGAAATATGGAGAAGACTTGGATTAGAAAATTTTCTGGGA  
GAAGTTTGAAACAAGGCCACAGGAAAACACTCTTAAAGATTACACAGCTGGTATTAAACGTGTTTATGGT  
ACCAGAGAAAAGAGTGGGGACGTTACAACATTATCGGTAATACGGTGATTATTGCTGCTTGTTAGCTTCCAT  
GTTGCCCATGGAGAAAATAATCAAAGGTGCATTTTTCGGAGATGACAGTTTACTATACTTCCCAAAGGTTGT  
GAGTTTCTGACATACAGCATAACAGCCAACCTTATGTGGAATTTTCGAGGCTAAGCTATTCAGAAAGCAGTATG  
GTTATTTCTGTGGAAGGTACGTGATACATCATGACAGAGGGTGTATTGTTTATTATGACCTTTGAAGTTGATT  
TCTAAACTTGGTGCTAAACACATCAAGGATTGGGATCACTTAGAAGAGTTCAGAAGATCCCTTTGTGATGTTG  
CAAATTCGTTGAACAACCTGTGCGTATTACACGCAGTTGGACGACGCTGTGAGTGAGGTCCATAAAACCGCACC  
CCCGGGTTCGTTTGTATATAAAAGTTTAGTTAAATATCTGTCCGATAAGGTTCTTTTGAAGTTTGTATAGA  
TGGCTCTTGTTAAGGGTAAAGTCAATATTAATGAGTTCATAGACTTGCAAAATCAGAAAAATTTCTCCGTCT  
ATGTTACACCTGTTAAGAGTGTGATCTCCAAGGTTGATAAGATATTGGTTCATGAAGATGAATCTTTGTC  
CGAAGTCAATTTACTCAAAGGTGTAAACCTATTGATGGTGGCTATGTACATCTTGCTGGTCTTGTTGAGTACA  
GGTGAATGGAATTTGCCAGATAATTGTCGTGGTGGTGTGAGTGTCTGTTTGGTCGATAAGAGAATGGAGAGA  
GCGGACGAGGCAACTCTTGCTTCACTATACCGCAGCGGCTAAGAAAAGGTTTCAGTTCAAAGTCGTTCCAA  
ATTACAACATCACTACCAAGGACGCAGAAAAGGCAGTTTGGCAAGTACTAGTTAATATTAGAAATGTTAAAT  
TGCTGCGGGTACTGTCCGCTGTCATTAGAATTTGTGTGAGTGTGATTGTTTATAAAAATATTATAAACTCG  
GTTTGAGAGAGAAAATTACGAGCGTCACGGATGGAGGGCCCATGGAATATCAGAAAGAGTTGTTGATGAG  
TTCATGGAAGAAGTCCCGATGTCTGTAAGGCTTGCAAAATTTGTTTGAAGACCGGAAAAAGTTTAGTAGTA

AAAGTGAGAATAATAGTGGTAATAATAGGCCGAAACCAAACAAAAACCAAAGGAAGGAAAAGGGTTTAAAA  
GTTAGGGTTGAGAAGGATAATTTAATTGATAATGAATTGGAGACTTACGTCGCCGATTCAGATTCGTATTTAA  
TATGTCTTACACAATCGCACTCCATCGCAATTTGTGTTTTTGTATCAGCATGGGCCGACCCTATAGAATTAAT  
AAATTTATGTACTAATTCAGTGGTAATCAGTTCCAAACACAACAAGCTAGAACAAACCGTTCAACGGCAATTTA  
GCGAAGTGTGGAAACCTGTCCCTCAAGTCACTGTTAGGTTTCTGACAGTGGTTTTAAGGTGTATAGGTACAA  
TGCGGTACTAGATCCTCTAGTTACTGCTTTGTTAGGAGCTTCGATACTAGAAATAGGATTATAGAAGTCGAAA  
ATCAGGCGAACCCGACAACCGCCGAAACGTTAGACGCTACTCGTAGAGTAGATGACGCAACGGTGGCTATAA  
GGAGCGCTATAAATAATTTAGTAGTAGAATTGGTCAAAGGAACAGGTTTGTACAATCAGAGCACATTTGAAA  
GTGCATCCGGTTTACAATGGTCCTCTGCACCTGCATCTTGA

#MW314098

1

ATGGCATACACACAGACAGCTACCACATCCGCTTTGCTCGACACTGTCCGAGGTAACAATACCTTGGTCAACG  
ATCTTGCGAAGCGGCGTCTTTATGACACAGCGGTGCGAGGTTCAACGCTCGTGATCGCAGGCCCAAAGTAA  
ATTTTTCCAAAGTAATAAGTGAGGAACAGACGCTTATTGCTACTAGGGCATATCCAGAATTCAGATAACCTTC  
TATAATACGCAGAACGCCGTGCATTGCTTGGCGGTGGACTACGATCCTTAGAACTGGAATATCTAATGATGC  
AGATCCCGTACGGATCACTCACATATGATATAGGTGGGAATTTTGCATCTCATCTGTTCAAAGGACGGGCATA  
TGTTCACTGCTGTATGCCAATCTTGATGTCCGCGACATAATGCGGCACGAAGGCCAGAAAGACAGTATAGAA  
TTATACCTTTCCAGGCTTGAGCGGGGCAACAAAGTTGTCCCAAATTTCCAAAGGAAGCTTTTGACAGATACG  
CTGAAACGCCAGACGAAGTTGTCTGTACAGTACCTTCCAAACGTGTACGCACCAGCAGGTGGAAAACACAG  
GCAGGGTGTATGCTATTGCACTGCACAGTATATACGATATACCTGCTGACGAATTCGGAGCGGCACTTTTAAG  
GAAAAATGTCCATGTTTGTACGCCGCCTTCCACTTTTCCGAGAATTTACTTCTCGAAGATTCACACGTCAACCT  
TGACGAAATCAATGCGTGTTTTTCGCGTGATGGAGACAAGCTGACTTTTTCTTTCGCATCTGAGAGCACTTTAA  
ATTATTGTCATAGTTATTCTAATATTTTAAAATACGTGTGCAAACTTACTTCCCGGCATCTAATAGAGAGGTCT  
ACATGAAGGAGTTTTTGGTCACCAGGGTTAACACCTGGTTTTGTAAGTTTTCTAGGATAGATACTTTTTTATTAT  
ACAAGGGGGTAGCCCACAAAGGTGTAAATAGTGAGCAATTTTACAGCGCAATGGAAGATGCATGGCACTACA  
AAAAGACTCTTGCAATGTGTAAACAGCGAGAGGATTCTTCTGAAGATTCCTCATCGGTCAATTACTGGTTCCCA  
AAAATGAGAGATATGGTCATAGTTCTCTATTTCGACATATCTCTCGACACCAGTAAAAGGACCCGCAAAGAAG  
TCTTAGTGTCAAAGGATTTTGTATTACAGTTTTAAATCACATTGCACTTATCAAGCCAAGGCACTTACATACT  
CCAATGTTTTATCCTTTGTGCAATCAATTCGTTCAAGGGTAATTATCAACGGAGTGACTGCCAGGTCTGAGTGG  
GATGTTGACAAATCTCTTTTGAATCCTTGTCCATGACATTTTCTTGCATACTAAGCTTGCCGTTTTAAAAGAC  
GAATTGTTAATCAGCAAGTTTAGTTTGGGGCCAAAATCAGTAAGCCAGCATGTATGGGATGAGATTTCCCTGG  
CTTTTGAAACGCATTTCCATCGATCAAGGAGAGACTGCTAAATCGGAACTAATTAAGTGTGCGGAGACGC  
ATTAGAAATCAGGGTGCCTGATTTATATGTGACTTTTACGATAGATTAGTGACTGAGTACAAAACATCGGTG  
GATATGCCAGTGCTTGATATCAGAAAGAGAATGGAGGAGACTGAGGTTATGTACAATGCATTGTCTGAGCTA  
TCTGTGCTCAAGGAGTCGGACAAGTTTCGACGTTGATGTTTTTCCCGGATGTGCCAGACTTTGGAGGTAGACC  
CAATGACTGCAGCAAAGGTTATTGTGGCAGTGATGAGCAACGAGAGCGGACTGACTCTTACATTGCAACAGC  
CAACTGAAGCAAATGTCGATTGGCACTTAAAGATTAGAAAAAGCCTCTGAGGGTGAAGTGGTTACTTC  
TAGAGATGTTGAAGAACCATCCATGAAGGGTTCAATGGCAAGAGGAGAGTTACAATTGGCCGGTCTGTCTGG  
AGACCAACCAGAGTCTTCTATACTCGGAACGAGGAAATAGAGTCATTAGAGCAATTCACATGGCAACGGCT  
AGTTCGTTAATTCGGAAACAGATGAGTTGATTGTGTACACGGGCCCATTAAGTTGAGCAATGAAAACT  
TTATTGATAGCTGGTAGCATCACTCTCTGCTGCGGTGTGCAACCTAGTCAAGATCCTAAAGGATACAGCTGCT  
ATAGATCTCGAAACCCGTCAGAAGTTTGGAGTCTTAGATGTTGCGACCAAAGATGGTTAATTAACCTTTAG  
CCAAGAATCACGCATGGGGCGTTATTGAAACACATGCTAGGAAGTACCACGTTGCACTTTTGGAGTATGATGA

GCATGGAGTGGTAACTTGCGACAGTTGGAGAAGGGTGGCCGTGAGTTCTGAGTCAATGGTTTATTCTGATAT  
GGCAAAGCTCAGAACACTGAGGAGATTATTAAGAGATGGTGAGCCTCATGTCAGCAGTGCTAAAGTCGTCT  
AGTTGACGGTGTCCCGGGTTGTGGAAAGACAAAAGAGATTCTCTCGAAAGTAAATTTTGAGGAAGATCTGAT  
CTTAGTACCGGGTAAGCAGGCTGCTGAAATGATAAAGAGGCGTGCTAATGCGTCAGGAATAATTCAAGCCAC  
AAGAGATAATGTTCTGACTGTTGATTCAATTTATAATGAATTACGGTAAAGGAACACGCTGTCAAGTTCAAAGG  
TTATTTATCGACGAAGGTCTGATGTTGCACACTGGTTGTGTGAATTTCTTGTTTCTATGTCTCTGTGCGAAATT  
GCATATGTTTATGGAGACACACAACAAATTCCATACATCAACAGAGTATCCGGTTTTCCGTACCCTGCACATTT  
TGCAAAAATAGAGGTTGATGAGGTGGAACTCGCAGAACTACGCTGCGTTGTCCAGCCGACATTACCCACTAT  
CTTAACAGAAGGTACGAAGGACATGTCATGTGTACATCGTCGGTTAAAAAGTCAGTTTCTCAGGAAATGGTGA  
GCGGGGCCGCAATGATCAATCCTGTATCTAAGCCATTGAATGGGAAAGTTTTGACTTTCACTCAGTCTGATAA  
AGAGGCGCTGCTTTCTCGAGGATATACGGACGTCCATACAGTACATGAGGTACAAGGTGAGACATATGCAGA  
TGTGTCGTTGGTCAGATTGACTCCGACACCTGTATCTATCATCGCAGGAGATAGTCCGCACGTTCTCGTAGCTT  
TGTC AAGGCATACCCAAACATTGAAGTATTACCCGTAGTGATGGATCCTCTTGTAAGTATAATTAGGGATTTA  
GAAAACTTAGTTCTTACTTGTTAGATATGTATAAAGTAGATGCAGGGACCCAATAGCAATTACAGGTAGACT  
CCGTGTTTAAAGGTTCTAATCTTTTTGTTGCAGCACCAAAGACTGGAGATATCTCAGATATGCAATTTTACTAT  
GATAAGTGTCTCCAGGTAATAGCACCATGTTAAATACTATGATGCTGTTACCATGAGGTTGACTGACATTTT  
TCTTAATGTCAAAGATTGCATATTGGATTTCTCTAAGTCTGTGGCTGCACCGAAGGATCCGATCAAACCACTGA  
TTCCAATGGTACGAACGGCGGCAGAAAAGCCACGCCAGACTGGACTATTGAAAAATTTGGTGGCGATGATCA  
AAAGAACTTTAATTCACCGGAGTTATCAGGAATAATCGACATTGAGAATACTGCATCTTTAGTAGTAGATAA  
ATTTTTGATAGTTACTTACTTAAAGAAAAAAGAAAAACCAAATAAAAAATGTTTCTTTATTTGTAGAGAGTCTCT  
CAATAGATGGTTAGAGAAGCAGGAGCAAGTGACCATTGGTCAGCTTGCAGATTTTGATTTTGTGGATCTTCCT  
GCCGTTGATCAGTACAGGCATATGATTAAGCGCAACCTAAGCAGAAGCTGGATACATCAATTCAAAGCGAAT  
ATCCGGCCTTGACAGCAGATTGTGTATCATTGAAAAAGATCAACGCAATCTTCGGTCCTTTGTTCAAGTGAGCTC  
ACAAGGCAAATGCTCGAAAGCATAGACTCAAGTAAGTTTTGTCTTTACAAGGAAGGCGCCAGCTCAAATTG  
AGGATTTCTTCGGAGATCTCGATAGCCATGTCCCTATGGATATCTTGAGTTGGATATTTGGAAGTATGACAAA  
TCTCAGAACGAGTTCCACTGTGCAGTAGAGTATGAAATATGGAGAAGACTTGGATTAGAAGATTTTCTGGGA  
GAAGTTTGAAACAAGGCCACAGAAAACTACTCTTAAAGATTACACAGCTGGTATTAAAACGTGTTTATGGT  
ACCAGAGAAAAGAGTGGGGACGTTACAACATTATCGGTAATACGGTGATTATTGCTGCTTGTTTAGCATCCAT  
GTTGCCCATGGAGAAAATAATCAAAGGTGCATTTTGCGGAGATGACAGTTTGCTATACTTCCCAAAGGTTGT  
GAGTTTCTGACATACAGCATAACAGCCAACCTTATGTGGAATTTGAGGCTAAGCTATTCAGAAAGCAGTATG  
GTTATTTCTGTGGAAGGTACGTGATACATCACGACAGAGGGTGTATTGTTTATTATGACCTTTGAAGTTGATT  
TCTAACTTGGTGCTAAACACATCAAGGATTGGGATCACTTAGAAGAGTTCAGAAGATCCCTTTGTGATGTTG  
CAAATTCGTTGAACAACCTGTGCGTATTACACGCAGTTGGACGACGCTGTGAGTGAGGTCCATAAAACCGCACC  
CCCGGGTTCGTTTGTATATAAAAGTTTGTAAATATCTGTCGATAAGGTTCTTTTTAGAAAGTTGTTTATAGA  
TGGCTCTTGTTAAGGGTAAAGTCAATATTAATGAGTTCATAGACTTGTCAAATCAGAAAAATTTCTCCGTCT  
ATGTTACACCTGTTAAGAGTGTGATCTCCAAGGTTGATAAGATATTGGTTCATGAAGATGAATCTTTGTC  
CGAAGTCAATTTACTCAAAGGTGTAAACTCATTGATGGTGGCTATGTACATCTTGCTGGTCTTGTTGGTGACA  
GGTGAATGGAATTTGCCAGATAATTGTCGTGGTGGTGTGAGTGTCTGTTTGGTCGATAAGAGAATGGAGAGA  
GCGGACGAGGCAACTCTTGCTTACTATACCGCAGCGCTAAGAAAAGGTTTCAGTTCAAAGTCGTTCCAA  
ATTACAACATCACTACCAAGGACGCAGAAAAGGCAGTTTGGCAAGTACTAGTTAATATTAGAAATGTTAAAT  
TGCTGCGGGTACTGTCCGCTGTCATTAGAATTTGTGTGAGTGTGATTGTTTATAAAAAATATTATAAACTCG  
GTTTGAGAGAGAAAATTACGAGCGTCACGGATGGAGGGCCTATGGAATCTGAAGAAGTTGTTGATGAGT  
TCATGGAAGAAGTCCCGATGTCTGTAAGGCTTGCAAAATTCGTTGGAAGACCGGAAAAAAGTTTAGTAGTAA  
AAGTGAGAATAATAGTGGTAATAATAGGCCGAAACCAAACAAAAACCAAAGGAAGGAAAAGGGTTTAAAG  
TTAGGGTTGAGAAGGATAATTTAATTGATAATGAATTGGAGACTTACGTCGCCGATTAGATTCTGATTAAAT  
ATGTCTTACACAATCGCAACTCCATCGCAATTTGTGTTTTGTCATCAGCATGGGCCGACCCTATAGAATTAATA  
AATTTATGTAATAATTCACTAGGTAATCAGTTCCAAACACAACAAGCTAGAACACCGTTCAACGGCAATTTAG  
CGAAGTGTGGAAACCTGTCCCTCAAGTCACTGTTAGGTTTCTGACAGTGGTTTAAAGGTGTATAGGTACAAT



GCGGTACTAGATCCTCTAGTTACTGCTTTGTTAGGAGCTTCGATACTAGAAATAGGATTATAGAAGTCGAAA  
ATCAGGCGAACCCGACAACCGCCGAAACGTTAGACGCTACTCGTAGAGTAGATGACGCAACGGTGGCTATAA  
GGAGCGCTATAAATAATTTAGTAGTAGAATTGGTCAAAGGAACAGGTTTGTACAATCAGAGCACATTTGAAA  
GTGCATCCGGTTTACAATGGTCCTCTGCACCTGCATCTTGA

#MW314111

1

ATGGCATACACACAGACAGCTACCACATCCGCTTTGCTCGACACTGTCCGAGGTAACAATACCTTGGTCAATG  
ATCTTGCGAAGCGGCGTCTTTATGACACAGCGGTGCGACGATTCAACGCTCGTGATCGCAGGCCCAAAGTAA  
ATTTTTCCAAAGTAATAAGTGAGGAACAGACGCTTATTGCTACTAGGGCATATCCAGAATTCCAGATAACCTTC  
TATAATACGCAGAACGCCGTGCATTGCTTGCCGGTGGACTACGATCCTTAGAACTGGAATATCTAATGATGC  
AGATCCCGTACGGATCACTCACATATGATATAGGTGGGAATTTTGCATCTCATCTGTTCAAAGGACGGGCATA  
TGTTCACTGCTGTATGCCCAATCTTGATGTCCGCGACATAATGCGGCACGAAGGCCAGAAAGACAGTATAGAA  
TTATACCTTTCCAGGCTTGAGCGGGGCAACAAAGTTGTCCCAAATTTCCAAAAGGAAGCTTTTGACAGATACG  
CTGAAACGCCAGACGAAATTGTCTGTCACAGTACCTTCCAAACGTGTACGCACCAGCAGGTGGAAAACACAG  
GCAGGGTGTATGCTATTGCATTGCACAGTATATACGATATACCTGCTGATGAATTCGGAGCGGCACTTTTAAG  
GAAAAATGTCCATGTTTGTACGCCGCCTTCCACTTTTCCGAGAATTTACTTCTCGAAGATTCACACGTCAACCT  
TGACGAAATCAACGCGTGTTTTTCGCGTGATGGAGACAAGCTGACTTTTTCTTTCGCATCTGAGAGCACTTTAA  
ATTATTGTCATAGTTATTCTAATATTTTAAAATACGTGTGCAAACTTACTTCCCGGCATCTAATAGAGAGGTCT  
ACATGAAGGAGTTTTTAGTCACCAGGGTTAACACCTGGTTTTGTAAGTTTTCTAGGATAGATACTTTTTTATTAT  
ACAAGGGGGTAGCCCAAAAGGTGTAAATAGTGAGCAATTTTACAGCGCAATGGAAGATGCGTGCGCACTACA  
AAAAGACTCTTGCAATGTGTAAACAGCGAGAGGATTCTTCTGAAGATTCCTCATCGGTCAATTACTGGTCCCA  
AAAATGAGAGATATGGTCATAGTTCTCTATTTCGACATATCTCTCGACACCAGTAAAAGGACCCGCAAAGAAG  
TCTTAGTGCAAAAGGATTTTGTATTACAGTTTTTAAATCACATTGCACTTATCAAGCCAAGGCACTTACATACT  
CCAATGTTTTATCCTTTGTGCAATCAATTCGTTCAAGGGTAATTATCAACGGAGTGACTGCCAGGTCTGAGTGG  
GATGTTGACAAATCTTTTTGCAATCCTTGTCATGACATTTTTCTTGCATACTAAGCTTGCCGTTTTAAAAGAC  
GAATTGTTAATCAGCAAGTTTAGTTTGGGGCCAAAATCAGTAAGCCAGCATGTATGGGATGAGATTTCCCTGG  
CTTTTGAAACGCATTTCCATCGATCAAGGAGAGACTGCTAAATCGGAACTAATTAAGTGTCGGGAGACGC  
ATTAGAAATCAGGGTGCCTGATTTATATGTGACTTTTCACGATAGATTAGTGACTGAGTACAAAACATCGGTG  
GATATGCCAGTGCTTGATATCAGAAAGAGAATGGAGGAGACTGAGGTTATGTACAATGCATTGTCTGAGCTA  
TCTGTGCTCAAGGAGTCGGACAAGTTGACGTTGATGTTTTTCCCGGATGTGCCAGACTTTGGAGGTAGACC  
CAATGACTGCAGCAAAGGTTATAGTGGCAGTGATGAGCAACGAGAGCGGACTGACTCTTACATTGCAACAGC  
CAACTGAAGCAAATGTCGATTGGCACTTAAAGATTGAGAAAAAGCCTCTGAGGGTGCCTAGTGGTTACTTC  
TAGAGATGTTGAAGAACCATCCATGAAGGGTTCAATGGCAAGAGGAGAGTTACAATTGGCCGGTCTGTCTGG  
AGACCAACCAGAGTCTTCCTATACTCGGAACGAGGAAATAGAGTCATTAGAGCAATTCACATGGCAACGGCT  
AGTTCGTTAATTCGGAAACAGATGAGTTGATTGTGTACACGGGCCCATTAAGTTGAGCAATGAAAACT  
TTATTGATAGCCTAGTAGCATCACTCTCTGCTGCGGTGTGCAACCTAGTCAAGATCCTAAAGGATACAGCTGCT  
ATAGATCTCGAAACCCGTCAGAAGTTGCGAGTCTTAGATGTTGCGACCAAAGATGGTTAATTAACCTTTAG  
CCAAGAATCACGCATGGGGCGTTATTGAAACACATGCTAGGAAGTATCACGTTGCACTTTTGGAGTATGATGA  
GCATGGAGTGGTAACTTGCGACAGTTGGAGAAGGGTGGCCGTGAGTTCTGAGTCAATGGTTTATTCTGATAT  
GGCAAAGCTCAGAACTGAGGAGATTATTAAGAGATGGTGAGCCTCATGTCAGCAGTGCTAAAGTCGTCTCT  
AGTTGACGGTGTCCCGGGTTGTGGAAAGACAAAAGAGATTCTCTCGAAAGTAAATTTGAGGAAGATCTAAT  
CTTAGTACCGGGTAAGCAGGCTGCTGAAATGATAAAGAGGCGTGCTAATGCGTCAGGAATAATTCAAGCCAC  
AAGAGATAATGTTCTGACTGTTGATTCAATTTATAATGAACTACGGTAAAGGAACACGCTGTCAGTTCAAAGG

TTATTTATCGACGAAGGTCTGATGTTGCACACTGGTTGTGTGAATTTCTTGTTTCTATGTCTCTGTGCGAAATT  
GCATATGTTTATGGAGACACACAACAAATTCCATACATCAACAGAGTATCCGGTTTTCCGTACCCTGCACATTT  
TGCAAAAATAGAGGTTGATGAGGTGGAACTCGCAGAACTACGCTGCGTTGTCCAGCCGACATTACCCACTAT  
CTTAACAGAAGGTACGAAGGACATGTCATGTGTACATCGTCGGTTAAAAAGTCAGTTTCTCAGGAAATGGTGA  
GCGGGGCCGAATGATCAATCCTGTATCTAAGCCATTGAATGGGAAAGTTTTGACTTTCACTCAGTCTGATAA  
AGAGGCGCTGCTTCTCGAGGATATACGGACGTCCATACAGTACATGAGGTACAAGGTGAGACATATGCAGA  
TGTGTCGTTGGTCAGATTGACTCCGACACCTGTGTCTATCATCGCAGGAGATAGTCCGCACGTTCTCGTAGCTT  
TGTCAAGGCATACCCAAACATTGAAGTATTACACCGTAGTGATGGATCCTCTTGTAAGTATAATTAGGGATTTA  
GAAAACTTAGTTCTTACTTGTTAGATATGTATAAAGTAGATGCAGGGACCCAATAGCAATTACAGGTAGACT  
CCGTGTTTAAAGGTTCTAATCTTTTTGTTGCAGCACCAAGACTGGAGATATCTCAGATATGCAATTTTACTAT  
GATAAGTGTCTCCAGGTAATAGCACCATGTTAAATACTATGATGCTGTTACCATGAGGTTGACTGACATTTCT  
TCTTAATGTCAAAGATTGCATATTGGATTTCTCTAAGTCTGTGGCTGCACCGAAGGATCCGATCAAACCACTGA  
TTCCAATGGTACGAACGGCGGCAGAAATGCCACGCCAGACTGGACTATTGGAAAATTTGGTGGCGATGATCA  
AAAGAACTTTAATTCACCGGAGTTATCAGGAATAATCGACATTGAGAATACTGCATCTTAGTAGTAGATAA  
ATTTTTGATAGTTACTTGCTTAAAGAAAAAGAAAACCAAATAAAAAATGTTTCTTTATTTGTAGAGAGTCTCT  
CAATAGATGGTTAGAGAAGCAGGAGCAAGTGACCATTGGTCAGCTTGCAGATTTTGATTTTGTGGATCTTCT  
GCCGTTGATCAGTACAGGCATATGATTAAGCGCAACCTAAGCAGAAGCTGGATACATCGATTCAAAGCGAA  
TATCCGGCCTTGAGACGATTGTGTATCATTCGAAAAAGATCAACGCAATCTTCGGTCTTTGTTGAGTGAGCT  
CACAAGGCAAATGCTCGAAAGCATAGACTCAAGTAAGTTTTGTTCTTTACAAGGAAGACGCCAGCTCAAATT  
GAGGATTTCTTCGGAGATCTCGATAGCCATGTCCCTATGGATATCTTGGAGTTGGATATTTGGAAGTATGACA  
AATCTCAGAACGAGTTCCACTGTGCAGTAGAGTATGAAATATGGAGAAGACTTGGATTAGAAGATTTTCTGG  
GAGAAAGTTTGGAAACAAGGCCACAGAAAACTACTCTTAAAGATTACACAGCTGGTATTAACCGTGTTTATG  
GTACCAGAGAAAAGAGTGGGGACGTTACAACATTATCGGTAATACGGTGATTATTGCTGCTTGTAGCTTCC  
ATGTTGCCCATGGAGAAAATAATCAAAGGTGCATTTTGGGAGATGACAGTTTACTATACTTCCAAAAGGTT  
GTGAGTTTCTGACATACAGCATAACGCCAACCTTATGTGGAATTTGAGGCTAAGCTATTCAGAAAGCAGTA  
TGTTTATTTCTGTGGAAGGTACGTGATACATCATGACAGAGGGTGTATTGTTTATTATGACCTTTGAAGTTGA  
TTTCTAACTTGGTGCTAAACACATCAAGGATTGGGATCACTTAGAAGAGTTCAGAAGATCCCTTTGTGATGTT  
GCAATTTGTTGAACAACCTGTGCGTATTACACGCAGTTGGACGACGCTGTGAGTGAGGTCCATAAAACCGCAC  
CCCCGGGTTGTTTTGTTTATAAAAGTTTAGTTAAATATCTGTCCGATAAGGTTCTTTTAGAAGTTTGTATAG  
ATGGCTCTTGTTAAGGGTAAAGTCAATATTAATGAGTTCATAGACTTGTCAAATCAGAAAAATTTCTCCGTC  
TATGTTACACCTGTAAAGAGTGTCATGATCTCAAAGTTGATAAGATATTGGTTCATGAAGATGAATCTTTGT  
CCGAAGTCAATTTACTCAAAGGTGTAAACTCATTGATGGTGGCTATGTACATCTTGCTGGTCTTGTTGTAACA  
GGTGAATGGAATTTGCCAGATAATTGTCGTGGTGGTGTGAGTGTCTGTTTGGTCGATAAGAGAATGGAGAGA  
GCGGACGAGGCAACTCTTGCTTCATACTATACCGCAGCGGCTAAGAAAAGGTTTCAGTTCAAAGTCGTTCCAA  
ATTACAACATCACTACCAAGGACGCAGAAAAGGCAGTTTGCAAGTACTAGTTAATATTAGAAATGTTAAAA  
TGCTGCGGGTTACTGTCCGCTGTCATTAGAATTTGTGTGAGTGTATTGTTTATAAAAAATATTATAAACTCG  
GTTTGAGAGAGAAAATTACGAGCGTCACGGATGGAGGGCCCATGGAATATCAGAAGAAGTTGTTGATGAG  
TTCATGGAAGAAGTCCCGATGTCTGTAAGGCTTGCAAAATTTGTTTGAAGACCGGAAAAAAGTTTAGTAGTA  
AAAGTGAGAATAATAGTGGAATAATAGGCCGAAACCAGTCAAAAACCAAAGGAAGGAAAAGGGTTTAAAA  
GTTAGGGTTGAGAAGGATAATTTAATTGATAATGAATTGGAGACTTACGTCGCCGATTGAGATTCGATTATAA  
TATGTCTTACACAATCGCAACTCCATCGCAATTTGTGTTTTTGTATCAGCATGGGCCGACCCTATAGAATTAAT  
AAATTTATGTACTAATTCAGTAAATCAGTTCCAAACACAACAAGCTAGAACAACCGTTCAACGGCAATTTA  
GCGAAGTGTGGAACCTGTCCCTCAAGTCACTGTTAGGTTTCTGACAGTGGTTTTAAGGTGTATAGGTACAA  
TGCGGTACTAGATCCTCTAGTTACTGCTTTGTTAGGAGCTTTCGATACTAGAAATAGGATTATAGAAGTCGAAA  
ATCAGGCGAACCCGACAACCGCCGAAACGTTAGACGCTACTCGTAGAGTAGATGACGCAACGGTGGCTATAA  
GGAGCGCTATAATAATTTAGTAGTAGAATTGGTCAAAGGAACAGGTTTGTACAATCAGAGCACATTTGAAA  
GTGCATCCGGTTTACAATGGTCCTCTGCACCTGCATCTTGA

#MW314112

1

ATGGCATACACACAGACAGCTACCACATCCGCTTTGCTCGACACTGTCCGAGGTAACAATACCTTGGTCAACG  
ATCTTGCGAAGCGGCGTCTTTATGACACAGCGGTGCGACGAGTTCAACGCTCGTGATCGCAGGCCCAAAGTAA  
ATTTTTCCAAAGTAATAAGTGAGGAACAGACGCTTATTGCTACTAGGGCATATCCTGAATTCAGATAACCTTC  
TATAATACGCAGAACGCCGTGCATTGCTTGCCGGTGGACTACGATCCTTAGAACTGGAATATCTAATGATGC  
AGATCCCGTACGGATCACTCACATATGATATAGGTGGGAATTTTGCATCTCATCTGTTCAAAGGACGGGCATA  
TGTTCACTGCTGTATGCCAATCTTGATGTCCGCGACATAATGCGGCACGAAGGCCAGAAAGACAGTATAGAA  
TTATACCTTTCCAGGCTTGAGCGGGGCAACAAAGTTGTCCCAAATTTCCAAAAGGAAGCTTTTGACAGATACG  
CTGAAACGCCAGACGAAGTTGTCTGTACAGTACCTTCCAAACGTGTACGCACCAGCAGGTGGAAAACACAG  
GCAGGGTGTATGCTATTGCATTGCACAGTATATACGATATACCTGCTGATGAATTCGGAGCGGCACTTTTAAG  
GAAAAATGTCCATGTTTTTACGCCGCTTCCACTTTTCCGAGAATTTACTTCTCGAAGATTCACACGTCAACCT  
TGACGAAATCAACGCGTGTTTTTCGCGTGATGGAGACAAGCTGACTTTTTCTTTCGCATCTGAGAGCACTTTAA  
ATTATTGTCATAGTTATTCTAATATTTTAAAATACGTGTGCAAACTTACTTCCCGGCATCTAATAGAGAGGTCT  
ACATGAAGGAGTTTTTGGTCACCAGGGTTAACACCTGGTTTTGTAAGTTTTCTAGGATAGATACTTTTTTATTAT  
ACAAGGGGGTAGCCCACAAAGGTGTAAATAGTGAGCAATTTTACAGCGCAATGGAAGATGCATGGCACTACA  
AAAAGACTCTTGCAATGTGTAAACAGCGAGAGGATTCTTCTGAAGATTCCTCATCGGTCAATTACTGGTTCCCA  
AAAATGAGAGATATGGTCATAGTTCTCTATTGACATATCTCTCGACACTAGTAAAAGGACCCGCAAAGAAG  
TCTTAGTGTCAAAGGATTTTGTATTACAGTTTTTAAATCACATTCGCACTTATCAAGCCAAGGCACTTACATACT  
CCAATGTTTTATCCTTTGTGAATCAATTCGTTCAAGGGTAATTATCAACGGAGTGACTGCCAGGTCTGAGTGG  
GATGTTGACAAATCTTTTTGCAATCCTTGTCATGACATTTTTCTTGCACTAAGCTTGCCGTTTTTAAAGAC  
GAATTGTTAATCAGCAAGTTTAGTTTGGGGCCAAAATCAGTAAGCCAGCATGTATGGGATGAGATTTCCCTGG  
CTTTTGAAACGCATTTCCATCGATCAAGGAGAGACTGCTAAATCGGAACTAATTAAGTGTCGGGAGACGC  
ATTAGAAATCAGGGTGCCTGATTTATATGTGACTTTTACGACAGATTAGTGACTGAGTACAAAACATCGGTG  
GATATGCCAGTGCTTGATATCAGAAAGAGAATGGAGGAGACTGAGGTTATGTACAATGCATTGTCTGAGCTA  
TCTGTGCTCAAGGAGTCGGACAAGTTTCGACGTTGATGTTTTTCCCGGATGTGCCAGACTTTGGAGGTAGACC  
CAATGACTGCAGCAAAGGTTATTGTGGCAGTGATGAGCAACGAGAGCGGACTGACTCTTACATTGAAACAGC  
CAACTGAAGCAAATGTGCGATTGGCACTTAAAGATTGAGAAAAAGCCTCTGAGGGTGCCTAGTGGTTACTTC  
TAGAGATGTTGAAGAACCATCCATGAAGGGTTCATGGCAAGAGGAGAGTTACAATTGGCCGGTCTGTCTGG  
AGACCAACCAGAGTCTTCTATACTCGGAACGAGGAAATAGAGTCATTAGAGCAATTCACATGGCAACGGCT  
GGTTCGTTAATTCGGAAACAGATGAGTTCGATTGTGTACACGGGGCCCATTAAGTTTCAGCAAATGAAAACT  
TTATTGATAGCCTGGTAGCATCACTCTGTGCTGCGGTGTCGAACCTAGTCAAGATCCTAAAGGATACAGCTGCT  
ATAGATCTCGAAACCCGTCAGAAGTTTGGAGTCTTAGATGTTGCGACCAAAGATGGTTAATTAACCTTTAG  
CCAAGAATCACGCATGGGGCGTTATTGAAACACATGCTAGGAAGTACCACGTTGCACTTTTGGAGTATGATGA  
GCATGGAGTGGTAACTAGCGACAGTTGGAGAAGGGTGGCCGTGAGTTCTGAGTCAATGGTTTATTCTGATAT  
GGCAAAGCTCAGAACACTGAGGAGATTATTAAGAGATGGTGAGCCTCATGTCAGCAGTGCTAAAGTCGTCCT  
AGTTGACGGTGTCCCGGGTGTGGAAAGACAAAAGAGATTCTCTCGAAAGTAAATTTGAGGAAGATCTAAT  
CTTAGTACCGGTAAGCAGGCTGCTGAAATGATAAAGAGGCGTGCTAATGCGTCAGGAATAATTCAAGCCAC  
AAGAGATAATGTTCTGACTGTTGATTCAATTTATAATGAATTACGGTAAAGGAACACGCTGTCAAGTTCAAAGG  
TTATTTATCGACGAAGGTCTGATGTTGCACACTGGTTGTGTGAATTTCTTGTTTCTATGTCTCTGTGCGAAATT  
GCATATGTTTATGGAGACACACAACAATTCCATACATCAACAGAGTATCCGGTTTTCCGTACCCTGCACATTT  
TGCAAAAATAGAGGTTGATGAGGTGGAACTCGCAGAACTACGCTGCGTTGTCCAGCCGACATTACCCACTAT  
CTTAACAGAAGGTACGAAGGACATGTCATGTGTACATCGTCGGTTAAAAAGTCAGTTTCTCAGGAAATGGTGA  
GCGGGGCCGCAATGATCAATCCTGTATCTAAGCCATTGAATGGGAAAGTTTTGACTTTCACTCAGTCTGATAA

AGAGGCGCTGCTTTCTCGAGGATATACGGACGTCCATACAGTACATGAGGTACAAGGTGAGACATATGCAGA  
TGTGTCGTTGGTCAGATTGACTCCGACACCTGTATCTATCATCGCAGGAGATAGTCCGCACGTTCTCGTAGCTT  
TGTCAAGGCATACCCAAACATTGAAGTATTACACCGTAGTGATGGATCCTCTTGTAAGTATAAATTAGGGATTTA  
GAAAACTTAGTTCTTACTTGTTAGATATGTATAAAGTAGATGCAGGGACCCAATAGCAATTACAGGTAGACT  
CCGTGTTTTAAAGGTTCTAATCTTTTTGTTGCAGCACCAAAGACTGGAGATATCTCAGATATGCAATTTTACTAT  
GATAAGTGTCTCCAGGTAATAGCACCATGTTAAATAACTATGATGCTGTTACCATGAGGTTGACTGACATTTT  
TCTTAATGTCAAAGATTGCATATTGGATTTCTCTAAGTCTGTGGCTGCACCGAAGGATCCGATCAAACCACTGA  
TTCCAATGGTACGAACGGCGGCAGAAATGCCACGCCAGACTGGACTATTGGAAAATTTGGTGGCGATGATCA  
AAAGAACTTTAATTCACCGGAGTTATCAGGAATAATCGACATTGAGAATACTGCATCTTTAGTAGTAGATAA  
ATTTTTGATAGTTACTTGCTTAAAGAAAAAGAAAAACCAAATAAAAAATGTTTCTTTATTTGTAGAGAGTCTCT  
CAATAGATGGTTAGAGAAGCAGGAGCAAGTGACCATTGGTCAGCTTGCAGATTTTGATTTTGTGGATCTTCCT  
GCCGTTGATCAGTACAGGCATATGATTAAAGCGCAACCTAAGCAGAAGCTGGATACATCAATTCAAAGCGAAT  
ATCCGGCCTTGACAGACGATTGTGTATCATTGAAAAAGATCAACGCAATCTTCGGTCCCTTGTTTCAGTGAGCTC  
ACAAGGCAAATGCTCGAAAGCATAGACTCAAGTAAGTTTTGTCTTTACAAGGAAGACGCCAGCTCAAATTG  
AGGATTTCTTCGGAGATCTCGATAGCCATGTCCCTATGGATATCTTGAGTTGGATATTTGGAAGTATGACAAA  
TCTCAGAACGAGTTCCACTGTGCAGTAGAGTATGAAATATGGAGAAGACTTGGATTAGAAGATTTTCTGGGA  
GAAGTTTGAAACAAGGCCACAGGAAAACTACTCTTAAAGATTACACAGCTGGTATTAACCGTGTTTATGGT  
ACCAGAGAAAAGAGTGGGGACGTTACAACATTATCGGTAATACGGTGATTATTGCTGCTTGTTTAGCTTCCAT  
GTTACCCATGGAGAAAATAATCAAAGGTGCATTTTGCGGAGATGACAGTTTACTATACTTCCAAAAGGTTGT  
GAGTTTCTGACATACAGCATAACAGCAACCTTATGTGGAATTTTCGAGGCTAAGCTATTCAGAAAGCAGTATG  
GTTATTTCTGTGGAAGGTACGTGATACATCATGACAGAGGGTGTATTGTTTATTATGACCTTTGAAGTTGATT  
TCTAACTTGGTGCTAAACACATCAAGGATTGGGATCACTTAGAAGAGTTCAGAAGATCCCTTTGTGATGTTG  
CAAATTCGTTGAACAACTGTGCGTATTACACGCAGTTGGACGACGCTGTGAGTGAGGTCCATAAAACCGCACC  
CCCGGTTTCGTTTGATATAAAAGTTTAGTTAAATATCTGTCCGATAAGGTTCTTTTTAGAAGTTTGTATAGA  
TGGCTCTTGTTAAGGGTAAAGTCAATATTAATGAGTTCATAGACTTGTCAAATCAGAAAAATTTCTCCGTCT  
ATGTTACACCTGTTAAGAGTGTGATCTCCAAGGTTGATAAGATATTGGTTCATGAAGATGAATCTTTGTC  
CGAAGTCAATTTACTCAAAGGTGTAAACTCATTGATGGTGGCTATGTACATCTTGCTGGTCTTGTTGGTGACA  
GGTGAATGGAATTTGCCAGATAATTGTCGTGGTGGTGTGAGTGTCTGTTTGGTCGATAAAAGAATGGAGAGA  
GCGGACGAGGCAACTCTTGCTTCACTATACCGCAGCGGCTAAGAAAAGGTTTCAGTTCAAGGTGCTTCCAA  
ATTACAACATCACTACCAAGGACGCAGAAAAGGCAGTTTGGCAAGTACTAGTTAATATTAGAAATGTTAAAT  
TGCTGCGGGTTACTGTCCGCTGTCATTAGAATTTGTGTGAGTGTGATTGTTTATAAAAATATTATAAACTCG  
GTTTGAGAGAGAAAATTACGAGCGTCACGGATGGAGGGCCCATGGAAGTATCAGAAGAAGTTGTTGATGAG  
TTCATGGAAGAAGTCCCGATGTCTGTAAGGCTTGCAAAATTTGTTTGAAGACCGGGAAAAAGTTTAGTAGTA  
AAAGTGAGAATAATAGTGGTAATAATAGGCCGAAACCAACAAAAACCAAAGGAAGGAAAAGGGTTTAAAA  
GTTAGGGTTGAGAAGGATAATTTAATTGATAATGAATTGGAGACTTACGTCGCCGATTGAGATTCGATTAA  
TATGTCTTACACAATCGCAACTCCATCGCAATTTGTGTTTTGTGTCAGCATGGGCCGACCCTATAGAATTAAT  
AAATTTATGTACTAATTCAGTAAATCAATTCAAACACAACAAGCTAGAACAACCGTTCAACGGCAATTTA  
GCGAAGTGTGGAACCTGTCCCTCAAGTCACTGTTAGGTTTCTGACAGTGGTTTTAAGGTGTATAGGTACAA  
TGCGGTACTAGAACCTCTAGTTACTGCTTTGTAGGAGCTTTCGATACTAGAAATAGGATTATAGAAGTCAA  
AATCAGGCGAACCCGACAACCGCCGAAACGTTAGACGCTACTCGTAGAGTAGATGACGCAACGGTGGCTATA  
AGGAGCGCTATAAATAATTTAGTAGTAGAATTGGTCAAAGGAACAGGTTTGTACAATCAGAGCACATTTGAA  
AGTGCATCCGGTTTACAATGGTCCTCTGCACCTGCATCTTGA

#MW314118

ATGGCATACACACAGACAGCTACCACATCCGCTTTGCTCGACACTGTCCGAGGTAACAATACCTTGGTCAACG  
ATCTTGCGAAGCGGCGTCTTTATGACACAGCGGTGCGACGAGTTCAACGCTCGTGATCGCAGGCCCAAAGTAA  
ATTTTTCCAAAGTAATAAGTGAGGAACAGACGCTTATTGCTACTAGGGCATATCCTGAATTCCAGATAACCTTC  
TATAATACGCAGAACGCCGTGCATTGCTTGCCGGTGGACTACGATCCTTAGAACTGGAATATCTAATGATGC  
AGATCCCGTACGGATCACTCACATATGATATAGGTGGGAATTTTGCATCTCATCTGTTCAAAGGACGGGCATA  
TGTTCACTGCTGTATGCCCAATCTTGATGTCCGCGACATAATGCGGCACGAAGGCCAGAAAGACAGTATAGAA  
TTATACCTTTCCAGGCTTGAGCGGGGCAACAAAGTTGTCCCAAATTTCCAAAAGGAAGCTTTTGACAGATACG  
CTGAAACGCCAGACGAAGTTGTCTGTACAGTACCTTCCAAACGTGTACGCACCAGCAGGTGGAAAACACAG  
GCAGGGTGTATGCTATTGCATTGCACAGTATATACGATATACCTGCTGATGAATTCGGAGCGGCACTTTTAAG  
GAAAAATGTCCATGTTTGTACGCCGCCTTCCACTTTTCCGAGAATTTACTTCTCGAAGATTCACACGTCAACCT  
TGACGAAATCAACGCGTGTTTTTCGCGTGATGGAGACAAGCTGACTTTTTCTTTCGCATCTGAGAGCACTTTAA  
ATTATTGTCATAGTTATTCTAATATTTTAAAATACGTGTGCAAACTTACTTCCCGGCATCTAATAGAGAGGTCT  
ACATGAAGGAGTTTTTGGTCACCAGGGTTAACACCTGGTTTTGTAAGTTTTCTAGGATAGATACTTTTTTATTAT  
ACAAGGGGGTAGCCCACAAAGGTGTAAATAGTGAGCAATTTTACAGCGCAATGGAAGATGCATGGCACTACA  
AAAAGACTCTTGCAATGTGTAAACAGCGAGAGGATTCTTCTGAAGATTCCTCATCGGTCAATTACTGGTCCCA  
AAAATGAGAGATATGGTCATAGTTCCTCTATTCGACATATCTCTCGACACTAGTAAAAGGACCCGCAAAGAAG  
TCTTAGTGTCAAAGGATTTTGTATTACAGTTTTTAAATCACATTGCACTTATCAAGCCAAGGCACTTACATACT  
CCAATGTTTTATCCTTTGTGCAATCAATTCGTTCAAGGGTAATTATCAACGGAGTGACTGCCAGGTCTGAGTGG  
GATGTTGACAAATCTTTTTGCAATCCTTGTCATGACATTTTTCTTGCACTAAGCTTGCCGTTTTAAAAGAC  
GAATTGTTAATCAGCAAGTTTAGTTGGGGCCAAAATCAGTAAGCCAGCATGTATGGGATGAGATTTCCCTGG  
CTTTTGAAACGCATTTCCATCGATCAAGGAGAGACTGCTAAATCGGAACTAATTAAGTGTCGGGAGACGC  
ATTAGAAATCAGGGTGCCTGATTTATATGTGACTTTTACGATAGATTAGTGACTGAGTACAAAACATCGGTG  
GATATGCCAGTGCTTGATATCAGAAAGAGAATGGAGGAGACTGAGGTTATGTACAATGCATTGTCTGAGCTA  
TCTGTGCTCAAGGAGTCGGACAAGTTGACGTTGATGTTTTTCCCGGATGTGCCAGACTTTGGAGGTAGACC  
CAATGACTGCAGCAAAGGTTATTGTGGCAGTGATGAGCAACGAGAGCGGACTGACTCTTACATTGCAACAGC  
CAACTGAAGCAAATGTCGATTGGCACTTAAAGATTGAGAAAAGCCTCTGAGGGTGCAGTGTGTTACTTC  
TAGAGATGTTGAAGAACCATCCATGAAGGGTCAATGGCAAGAGGAGAGTTACAATTGGCCGGTCTGTCTGG  
AGACCAACCAGAGTCTTCTATACTCGGAACGAGGAAATAGAGTCATTAGAGCAATTCACATGGCAACGGCT  
GGTTCGTTAATTCGGAAACAGATGAGTTCGATTGTGTACACGGGCCCATTAAGTTGAGCAAATGAAAACT  
TTATTGATAGCCTGGTAGCATCACTCTCTGCTGCGGTGTGCAACCTAGTCAAGATCCTAAAGGATACAGCTGCT  
ATAGATCTCGAAACCCGTCAGAAGTTTGGAGTCTTAGATGTTGCGACCAAAGATGGTTAATTAACCTTTAG  
CCAAGAATCACGCATGGGGCGTTATTGAAACACATGCTAGGAAGTACCACGTTGCACTTTTGGAGTATGATGA  
GCATGGAGTGGTAACTTGCGACAGTTGGAGAAGGGTGGCCGTGAGTTCTGAGTCAATGGTTTATTCTGATAT  
GGCAAAGCTCAGAACTGAGGAGATTATTAAGAGATGGTGAGCCTCATGTGAGTAGTGCTAAAGTCGTCTCT  
AGTTGACGGTGTCCCGGGTTGTGAAAGACAAAAGAGATTCTCTCGAAAGTAAATTTGAGGAAGATCTAAT  
CTTAGTACCGGTAAGCAGGCTGCTGAAATGATAAAGAGGCGTGCTAATGCGTCAGGAATAATTCAAGCCAC  
AAGAGATAATGTTCTGACTGTTGATTCAATTAATGAATTACGGTAAAGGAACACGCTGTGAGTTCAAAGG  
TTATTTATCGACGAAGGTCTGATGTTGCACACTGGTTGTGTGAATTTCTTGTCTATGTCTCTGTGCGAAATT  
GCATATGTTTATGGAGACACACAACAATTCATACATCAACAGAGTATCCGGTTTTCCGTACCCTGCACATTT  
TGCAAAAATAGAGTTGATGAGGTGGAACTCGCAGAACTACGCTGCGTTGTCCAGCCGACATTACCCACTAT  
CTTAACAGAAGGTACGAAGGACATGTCATGTGTACATCGTCGGTTAAAAAGTCAGTTTCTCAGGAAATGGTGA  
GCGGGGCCGCAATGATCAATCCTGTATCTAAGCCATTGAATGGGAAAGTTTGAATTTCACTCAGTCTGATAA  
AGAGGCGCTGCTTCTCGAGGATATACGGACGTCCATACAGTACATGAGGTACAAGGTGAGACATATGCAGA  
TGTGTGCTTGGTCAGATTGACTCCGACACCTGTATCTATCATCGCAGGAGATAGTCCGCACGTTCTCGTAGCTT  
TGTCAAGGCATACCCAAACATTGAAGTATTACACCGTAGTGATGGATCCTCTTGAAGTATAATTAGGGATTTA  
GAAAACTTAGTTCTTACTTGTTAGATATGTATAAAGTAGATGCAGGGACCCAATAGCAATTACAGGTAGACT  
CCGTGTTTAAAGGTTCTAATCTTTTTGTTGCAGCACCAAGACTGGAGATATCTCAGATATGCAATTTTACTAT  
GATAAGTGCTCCCAGGTAATAGCACCATGTTAAATACTATGATGCTGTTACCATGAGGTTGACTGACATTC

TCTTAATGTCAAAGATTGCATATTGGATTTCTCTAAGTCTGTGGCTGCACCGAAGGATCCGATCAAACCACTGA  
TTCCAATGGTACGAACGGCGGCAGAAATGCCACGCCAGACTGGACTATTGGAAAATTTGGTGGCGATGATCA  
AAAGAACTTTAATTCACCGGAGTTATCAGGAATAATCGACATTGAGAATACTGCATCTTTAGTAGTAGATAA  
ATTTTTGATAGTTACTTGCTTAAAGAAAAAGAAAACCAAATAAAAAATGTTTCTTTATTTGTAGAGAGTCTCT  
CAATAGATGGTTAGAGAAGCAGGAGCAAGTGACCATTGGTCAGCTTGCAGATTTTGATTTTGTGGATCTTCCT  
GCCGTTGATCAGTACAGGCATATGATTAAAGCGCAACCTAAGCAGAAGCTGGATACATCAATTCAAAGCGAAT  
ATCCGGCCTTGCAGACGATTGTGTATCATTGAAAAAGATCAACGCAATCTTCGGTCCTTTGTTTCAGTGAGCTC  
ACAAGGCAAATGCTCGAAAGCATAGACTCAAGTAAGTTTTTGTCTTTACAAGGAAGACGCCAGCTCAAATTG  
AGGATTTCTTCGGAGATCTCGATAGCCATGTCCCTATGGATATCTTGGAGTTGGATATTTCGAAGTATGACAAA  
TCTCAGAACGAGTTCCACTGTGCAGTAGAGTATGAAATATGGAGAAGACTTGGATTAGAAGATTTTCTGGGA  
GAAGTTTGAAACAAGGCCACAGGAAACTACTCTTAAAGATTACACAGCTGGTATTAAACGTGTTTATGGT  
ACCAGAGAAAGAGTGGGGACGTTACAACATTCATCGGTAATACGGTGATTATTGCTGCTTGTGTTAGCTTCCAT  
GTTGCCCATGGAGAAAATAATCAAAGGTGCATTTTGGCGAGATGACAGTTTACTATACTTCCAAAAGGTTGT  
GAGTTTCTGACATACAGCATACAGCCAACCTTATGTGGAATTTTCGAGGCTAAGCTATTCAGAAAGCAGTATG  
GTTATTTCTGTGGAAGGTACGTGATACATCATGACAGAGGGTGTATTGTTTATTATGACCCTTTGAAGTTGATT  
TCTAACTTGGTGCTAAACACATCAAGGATTGGGATCACTTAGAAGAGTTCAGAAGATCCCTTTGTGATGTTG  
CAAATTCGTTGAACAACTGTGCGTATTACACGCAGTTGGACGACGCTGTGAGTGAGGTCCATAAAACCGCACC  
CCCGGGTTCGTTTGATATAAAAGTTAGTTAAATATCTGTCCGATAAGGTTCTTTTAGAAGTTTGTGTTATAGA  
TGGCTCTTGTTAAGGGTAAAGTCAATATTAATGAGTTCATAGACTTGTCAAATCAGAAAAATTTCTTCCGTCT  
ATGTTACACCTGTTAAGAGTGTGATGATCTCAAGGTTGATAAGATATTGGTTCATGAAGATGAATCTTTGTC  
CGAAGTCAATTTACTCAAAGGTGTAAGTCAATTTGATGGTGGCTATGTACATCTTGCTGGTCTTGTTGGTGACA  
GGTGAATGGAATTTGCCAGATAATTGTCGTGGTGGTGTGAGTGTCTGTTTGGTCGATAAAAGAATGGAGAGA  
GCGGACGAGGCAACTCTTGCTTCACTATACCGCAGCGGCTAAGAAAAGGTTTCAGTTCAAAGTCGTTCCAA  
ATTACAACATCACTACCAAGGACGCAAAAAAGGCAGTTTGGCAAGTACTAGTTAATATTAGAAATGTTAAAT  
TGCTGCGGGTACTGTCCGCTGTCATTAGAATTTGTGTGAGTGTGATTGTTTATAAAAAATATTATAAACTCG  
GTTTGAGAGAGAAAATTACGAGCGTAACGGATGGAGGGCCCATGGAAGTATCAGAAGAAGTTGTTGATGAG  
TTCATGGAAGAAGTCCCGATGTCTGTAAGGCTTGCAAAATTTGTTTCGAAGACCGGGAAAAAGTTTAGTAGTA  
AAAGTGAGAATAATAGTGGTAATAATAGGCCGAAACCAAACAAAAACCAAAGGAAGGAAAAAGGTTTAAAA  
GTTAGGGTTGAGAAGGATAATTTAATTGATAATGAATTGGAGACTTACGTCGCCGATTGAGATTCGTATTA  
TATGTCTTACACAATCGCAACTCCATCGCAATTTGTGTTTTTGTATCAGCATGGGCCGACCCTATAGAATTA  
AAATTTATGTACTAATTCAGTAAATCAATTCAAACACAACAAGCTAGAACAACCGTTCAACGGCAATTTA  
GCGAAGTGTGGAACCTGTCCCTCAAGTCACTGTTAGGTTTCTGACAGTGGTTTAAAGGTGTATAGGTACAA  
TGCGGTACTAGATCCTCTAGTTACTGCTTTGTTAGGAGCTTCGATACTAGAAATAGGATTATAGAAGTCGAAA  
ATCAGGCGAACCCGACAACCGCCGAAACGTTAGACGCTACTCGTAGAGTAGATGACGCAACGGTGGCTATAA  
GGAGCGCTATAATAATTTAGTAGTAGAATTGGTCAAAGGAACAGGTTTGTACAATCAGAGCACATTTGAAA  
GTGCATCCGGTTTACAATGGTCCTCTGCACCTGCATCTTGA

#MW314119

1

ATGGCATACACACAGACAGCTACCACATCCGCTTTGCTCGACACTGTCCGAGGTAACAATACCTTGGTCAACG  
ATCTTGCGAAGCGGCGTCTTTATGACACAGCGGTGCGACGAGTTCAACGCTCGTGATCGCAGGCCCAAAGTAA  
ATTTTTCAAAGTAATAAGTGAGGAACAGACGCTTATTGCTACTAGGGCATATCCTGAATTCAGATAACCTTC  
TATAATACGCAGAACGCCGTGCATTGCTTGGCGGTGGACTACGATCCTTAGAACTGGAATATCTAATGATGC  
AGATCCCGTACGGATCACTCACATATGATATAGGTGGGAATTTTGCATCTCATCTGTTCAAAGGACGGGCATA

TGTTCACTGCTGTATGCCCAATCTTGATGTCCGCGACATAATGCGGCACGAAGGCCAGAAAGACAGTATAGAA  
TTATACCTTTCCAGGCTTGAGCGGGGCAACAAAGTTGTCCCAAATTTCCAAAAGGAAGCTTTTGACAGATACG  
CTGAAACGCCAGACGAAGTTGTCTGTACAGTACCTTCCAAACGTGTACGCACCAGCAGGTGGAAAACACAG  
GCAGGGTGTATGCTATTGCATTGCACAGTATATACGATATACCTGCTGATGAATTCGGAGCAGCACTTTTAAG  
GAAAAATGTCCATGTTTGTACGCCGCCTTCCACTTTTCCGAGAATTTACTTCTCGAAGATTCACACGTCAACCT  
TGACGAAATCAACGCGTGTTTTTCGCGTGATGGAGACAAGCTGACTTTTTCTTTCGCATCTGAGAGCACTTTAA  
ATTATTGTCATAGTTATTCTAATATTTTAAAATACGTGTGCAAACTTACTTCCCAGCATCTAATAGAGAGGTCT  
ACATGAAGGAGTTTTTGGTCACCAGGGTTAACACCTGGTTTTGTAAGTTTTCTAGGATAGATACTTTTTATTAT  
ACAAGGGGGTAGCCCACAAAGGTGTAAATAGTGAGCAATTTTACAGCGCAATGGAAGATGCATGGCACTACA  
AAAAGACTCTTGCAATGTGTAAACAGCGAGAGGATTCTTCTTGAAGATTCCTCATCGGTCAATTACTGGTCCCA  
AAAATGAGAGATATGGTCATAGTTCCTCTATTTCGACATATCTCTCGACACTAGTAAAAGGACCCGCAAAGAAG  
TCTTAGTGCAAAGGATTTTGTATTACAGTTTTAAATCACATTGCACTTATCAAGCCAAGGCACTTACATACT  
CCAATGTTTTATCCTTTGTGCAATCAATTCGTTCAAGGGTAATTATCAACGGAGTGACTGCCAGGTCTGAGTGG  
GATGTTGACAAATCTTTTTGCAATCCTTGTCATGACATTTTTCTTGCATACTAAGCTTGCCGTTTTAAAAGAC  
GAATTGTTAATCAGCAAGTTTAGTTTGGGGCCAAAATCAGTAAGCCAGCATGTATGGGATGAGATTTCCCTGG  
CTTTTGAAACGCATTTCCATCGATCAAGGAGAGACTGCTAAATCGGAACTAATTAAGTGTCGGGAGACGC  
ATTAGAAATCAGGGTGCCTGATTTATATGTGACTTTTACGATAGATTAGTGACTGAGTACAAAACATCGGTG  
GATATGCCAGTGCTTGATATCAGAAAGAGAATGGAGGAGACTGAGGTTATGTACAATGCATTGTCTGAGCTA  
TCTGTGCTCAAGGAGTCGGACAAGTTTCGACGTTGATGTTTTTCCCAGGATGTGCCAGACTTTGGAGGTAGACC  
CAATGACTGCAGCAAAGGTTATTGTGGCAGTGATGAGCAACGAGAGCGGACTGACTCTTACATTGCAACAGC  
CAACTGAAGCAAATGTCGATTGGCACTTAAAGATTGAGAAAAGCCTCTGAGGGTGCCTAGTGTTACTTC  
TAGAGATGTTGAAGAACCATCCATGAAGGGTTCATGGCAAGAGGAGAGTTACAATTGGCCGGTCTGTCTGG  
AGACCAACCAGAGTCTTCTATACTCGGAACGAGGAAATAGAGTCATTAGAGCAATTCACATGGCAACGGCT  
GGTTCGTTAATTCGGAAACAGATGAGTTGATTGTGTACACGGGCCCATTAAGTTTCAGCAAATGAAAACT  
TTATTGATAGCCTGGTAGCATCACTCTCTGCTGCGGTGTGCAACCTAGTCAAGATCCTAAAGGATACAGCTGCT  
ATAGATCTCGAAACCCGTCAGAAGTTTGGAGTCTTAGATGTTGCGACCAAAGATGGTTAATTAACCTTTAG  
CCAAGAATCACGCATGGGGCGTTATTGAAACACATGCTAGGAAGTACCACGTTGCACTTTTGGAGTATGATGA  
GCATGGAGTGGTAACTTGCGACAGTTGGAGAAGGGTGGCCGTGAGTTCTGAGTCAATGGTTTATTCTGATAT  
GGCAAAGCTCAGAACTGAGGAGATTATTAAGAGATGGTGAGCCTCATGTGAGTAGTGCTAAAGTCGTCTCT  
AGTTGACGGTGTCCCGGGTTGTGGAAAGACAAAAGAGATTCTCTCGAAAGTAAATTTGAGGAAGATCTAAT  
CTTAGTACCGGTAAGCAGGCTGCTGAAATGATAAAGAGGCGTGCTAATGCGTCAGGAATAATTCAAGCCAC  
AAGAGATAATGTTGCTACTGTTGATTCATTTATAATGAATTACGGTAAAGGAACACGCTGTCAGTTCAAAGG  
TTATTTATCGACGAAGGTCTGATGTTGCACACTGGTTGTGTGAATTTCTTGTCTATGTCTCTGTGCGAAATT  
GCATATGTTTATGGAGACACACAACAAATTCATACATCAACAGAGTATCCGTTTTCCGTACCCTGCACATTT  
TGCAAAAATAGAGTTGATGAGGTGGAACTCGCAGAACTACGCTGCGTTGTCCAGCCGACATTACCCACTAT  
CTTAACAGAAGGTACGAAGGACATGTCATGTGTACATCGTCGGTTAAAAAGTCAGTTTCTCAGGAAATGGTGA  
GCGGGGCCGCAATGATCAATCCTGTATCTAAGCCATTGAATGGGAAAGTTTTGACTTTCACTCAGTCTGATAA  
AGAGGCGCTGCTTCTCGAGGATATACGGACGTCCATACAGTACATGAGGTACAAGGTGAGACATATGCAGA  
TGTGTGCTTGGTCAGATTGACTCCGACACCTGTATCTATCATCGCAGGAGATAGTCCGCACGTTCTCGTAGCTT  
TGTCAAGGCATACCCAAACATTGAAGTATTACACCGTAGTGATGGATCCTCTTGAAGTATAAATTAGGGATTTA  
GAAAACTTAGTTCTTACTTGTTAGATATGTATAAAGTAGATGCAGGGACCCAATAGCAATTACAGGTAGACT  
CCGTGTTTAAAGGTTCTAATCTTTTTGTTGCAGCACCAAGACTGGAGATATCTCAGATATGCAATTTTACTAT  
GATAAGTGCTCCCAGGTAATAGCACCATGTTAAATAACTATGATGCTGTTACCATGAGGTTGACTGACATTT  
TCTTAATGTCAAAGATTGCATATTGGATTTCTCTAAGTCTGTGGCTGCACCGAAGGATCCGATCAAACCACTGA  
TTCCAATGGTACGAACGGCGGCAGAAATGCCACGCCAGACTGGACTATTGGAAAATTTGGTGGCGATGATCA  
AAAGAACTTTAATTCACCGGAGTTATCAGGAATAATCGACATTGAGAATACTGCATCTTTAGTAGTAGATAA  
ATTTTTGATAGTTACTTGCTTAAAGAAAAAAGAAAAACCAATAAAAAATGTTTCTTTATTTGTAGAGAGTCTCT  
CAATAGATGGTTAGAGAAGCAGGAGCAAGTGACCATTGGTCAGTTGCAGATTTTGATTTTGTGGATCTTCTCT

GCCGTTGATCAGTACAGGCATATGATTAAAGCGCAACCTAAGCAGAAGCTGGATACATCAATTCAAAGCGAAT  
ATCCGGCCTTGACAGACGATTGTGTATCATTGAAAAAGATCAACGCAATCTTCGGTCCTTTGTTTCAGTGAGCTC  
ACAAGGCAAATGCTCGAAAGCATAGACTCAAGTAAGTTTTTGTCTTTACAAGGAAGACGCCAGCTCAAATTG  
AGGATTTCTTCGGAGATCTCGATAGCCATGTCCCTATGGATATCTTGGAGTTGGATATTTGGAAGTATGACAAA  
TCTCAGAACGAGTTCCACTGTGACGTAGAGTATGAAATATGGAGAAGACTTGGATTAGAAGATTTTCTGGGA  
GAAGTTTGAAACAAGGCCACAGGAAAACTACTCTTAAAGATTACACAGCTGGTATTAACGTTGTTTATGGT  
ACCAGAGAAAGAGTGGGGACGTTACAACATTCATCGGTAATACGGTGATTATTGCTGCTTGTGTTAGCTTCCAT  
GTTGCCCATGGAGAAAATAATCAAAGGTGCATTTTGGGAGATGACAGTTTACTATACTTCCAAAAGGTTGT  
GAGTTTCTGACATACAGCATAACAGCAACCTTATGTGGAATTTGAGGCTAAGCTATTCAGAAAGCAGTATG  
GTTATTTCTGTGGAAGGTACGTGATACATCATGACAGAGGGTGTATTGTTTATTATGACCTTTGAAGTTGATT  
TCTAACTTGGTGCTAAACACATCAAGGATTGGGATCACTTAGAAGAGTTCAGAAGATCCCTTTGTGATGTTG  
CAAATTCGTTGAACAACTGTGCGTATTACACGCAGTTGGACGACGCTGTGAGTGAGGTCCATAAAACCGCACC  
CCCGGGTTCGTTTGTATATAAAAGTTAGTTAAATATCTGTCCGATAAGGTTCTTTTAGAAATTTGTTTATAGA  
TGGCTCTTGTTAAGGGTAAAGTCAATATTAATGAGTTCATAGACTTGTCAAATCAGAAAAATTTCTCCGTCT  
ATGTTACACCTGTTAAGAGTGTGATGATCTCAAGGTTGATAAGATATTGGTTCATGAAGATGAATCTTTGTC  
CGAAGTCAATTTACTCAAAGGTGTAACCTCATTGATGGTGGCTATGTACATCTTGCTGGTCTTGTTGGTGACA  
GGTGAATGGAATTTGCCAGATAATTGTCGTGGTGGTGTGAGTGTCTGTTTGGTCGATAAAAGAATGGAGAGA  
GCGGACGAGGCAACTCTTGCTTCACTATACCGCAGCGGCTAAGAAAAGGTTTCAGTTCAAAGTCGTTCCAA  
ATTACAACATCACTACCAAGGACGCAAAAAAGGCAGTTTGGCAAGTACTAGTTAATATTAGAAATGTTAAAT  
TGCTGCGGGTACTGTCCGCTGTCATTAGAATTTGTGTGAGTGTGATTGTTTATAAAAATATTATAAACTCG  
GTTTGAGAGAGAAAATTACGAGCGTAACGGATGGAGGGCCCATGGAAGTATCAGAAGAAGTTGTTGATGAG  
TTCATGGAAGAAGTCCCGATGTCTGTAAGGCTTGCAAAATTTGTTTCGAAGACCGGGAAAAAGTTTAGTAGTA  
AAAGTGAGAATAATAGTGGTAATAATAGGCCGAAACCAAACAAAAACCAAAGGAAGGAAAAGGGTTTAAAA  
GTTAGGGTTGAGAAGGATAATTTAATTGATAATGAATTGGAGACTTACGTCGCCGATTTCAGATTCGTATTA  
TATGTCTTACACAATCGCAACTCCATCGCAATTTGTGTTTTTGTGTCAGCATGGGCCGACCCTATAGAATTA  
AAATTTATGTACTAATTCATAGGTAATCAATTCAAACACAACAAGCTAGAACAACCGTTCAACGGCAATTTA  
GCGAAGTGTGGAAACCTGTCCCTCAAGTCACTGTTAGGTTTCTGACAGTGGTTTTAAGGTGTATAGGTACAA  
TGCGGTACTAGATCCTCTAGTTACTGCTTTGTTAGGAGCTTTCGATACTAGAAATAGGATTATAGAAGTCGAAA  
ATCAGGCGAACCCGACAACCGCCGAAACGTTAGACGCTACTCGTAGAGTAGATGACGCAACGGTGGCTATAA  
GGAGCGCTATAATAATTTAGTAGTAGAATTGGTCAAAGGAACAGGTTTGTACAATCAGAGCACATTTGAAA  
GTGCATCCGGTTTACAATGGTCCTCTGCACCTGCATCTTGA

#MW314123

1

ATGGCATACACACAGACAGCTACCACATCCGCTTTGCTCGACACTGTCCGAGGTAACAATACCTTGGTCAATG  
ATCTTGCGAAGCGGCGTCTTTATGACACAGCGGTGCGAGGTTCAACGCTCGTGATCGCAGGCCCAAAGTAA  
ATTTTTCAAAGTAATAAGTGAGGAACAGACGCTTATTGCTACTAGGGCATATCCAGAATTCCAGATAACCTTC  
TATAATACGCAGAACGCCGTGCATTGCTTGGCGGTGGACTACGATCCTTAGAACTGGAATATCTAATGATGC  
AGATCCCGTACGGATCACTCACATATGATATAGGTGGGAATTTTGCATCACATCTGTTCAAAGGACGGGCATA  
TGTTCACTGCTGTATGCCAATCTTGATGTCCGCGACATAATGCGGCACGAAGGCCAGAAAGACAGTATAGAA  
TTATACCTTTCCAGGCTTGAGCGGGGCAACAAAGTTGTCCCAAATTTCCAAAAGGAAGCTTTTACAGATACG  
CTGAAACGCCAGACGAAGTTGTCTGTACAGTACCTTCAAACGTGTACGCACCAGCAGGTGGAAAACACAG  
GCAGGGTGTATGCTATTGCATTGCACAGTATATACGATATACCTGCTGATGAATTCGGAGCGGCACTTTTAAG  
GAAAAATGTCCATGTTTGTACGCCGCTTCCACTTTTCCGAGAATTTACTTCTCGAAGATTCACACGTCAACCT



TGACGAAATCAACGCGTGTTCCTCGCGTGATGGAGACAAGCTGACTTTTCTTCGCATCTGAGAGCACTTTAA  
ATTATTGTCATAGTTATTCTAATATTTTAAAATACGTGTGCAAACTTACTTCCCGGCATCTAATAGAGAGGTCT  
ACATGAAGGAGTTTTAGTCACCAGGGTTAACACCTGGTTTTGTAAGTTTTCTAGGATTGATACTTTTTATTAT  
ACAAGGGGGTAGCCCAAAAGGTGTAAATAGTGAGCAATTTTACAGCGCAATGGAAGATGCATGGCACTACA  
AAAAGACTCTTGCAATGTGTAAACAGCGAGAGGATTCTTCTTGAAGATTCCTCATCGGTCAATTACTGGTCCCA  
AAAATGAGAGATATGGTCATAGTTCCTCTATTGACATATCTCTCGACACCAGTAAAAGGACCCGCAAAGAAG  
TCTTAGTGTCAAAGGATTTTGATTACAGTTTTAAATCACATTGCACTTATCAAGCCAAGGCACTTACATACT  
CCAATGTTTTATCCTTTGTCGAATCAATTCGTTCAAGGGTAATTATCAACGGAGTGACTGCTAGGTCTGAGTGG  
GATGTTGACAAATCTCTTTGCAATCCTTGTCATGACATTTTCTTGCACTAAGCTTGCCGTTTTAAAAGAC  
GAATTGTTAATCAGCAAGTTTAGTTTGGGGCCAAAATCAGTAAGCCAGCATGTATGGGATGAGATTTCCCTGG  
CTTTTGAAACGCATTTCCATCGATCAAGGAGAGACTGCTAAATCGGAACTAATTAAGTGTCGGGAGACGC  
ATTAGAAATCAGGGTGCCTGATTTATATGTGACTTTTACGATAGATTAGTGACTGAGTACAAAACATCGGTG  
GATATGCCAGTGCTTGATATCAGAAAGAGAATGGAGGAGACTGAGGTTATGTACAATGCATTGTCTGAGCTA  
TCTGTGCTCAAGGAGTCGGACAAGTTCGACGTTGATGTTTTTCCCGGATGTGCCAGACTTTGGAGGTAGACC  
CAATGACTGCAGCAAAGTTATAGTGGCAGTGATGAGCAACGAGAGCGGACTGACTCTTACATTGCAACAGC  
CAACTGAAGCAAATGTCGATTGGCACTTAAAGATTGAGAAAAAGCCTCTGAGGGTGCCTAGTGTTACTTC  
TAGAGATGTTGAAGAACCATCCATGAAGGGTTCAATGGCAAGAGGAGAGTTACAATTGGCCGGTCTGTCTGG  
AGACCAACCAGAGTCTTCCTATACTCGGAACGAGGAAATAGAGTCATTAGAGCAATTCCACATGGCAACGGCT  
AGTTCGTTAATTCGGAAACAGATGAGTTCGATTGTGTACACGGGCCCATTAAGTTGAGCAATGAAAACT  
TTATTGATAGCCTGGTAGCATCACTCTCTGCTGCGGTGTGCAACCTAGTCAAGATCCTAAAGGATACAGCTGCT  
ATAGATCTCGAAACCCGTCAGAAGTTTGGAGTCTTAGATGTTGCGACCAAAGATGGTTAATTAACCTTTAG  
CCAAAAATCACGCATGGGGCGTTATTGAAACACATGCTAGGAAGTACCACGTTGCACTTTTGGAGTATGATGA  
GCATGGAGTGGTAACTTGCGACAGTTGGAGAAGGGTGGCCGTGAGTTCTGAGTCAATGGTTATTCTGATAT  
GGCAAAGCTCAGAACACTGAGGAGATTATTAAGAGATGGTGAGCCTCATGTGAGCAGTGCTAAAGTCGTCT  
AGTTGACGGTGTCCCGGGTTGTGAAAGACAAAAGAGATTCTCTCGAAAGTAAATTTGAGGAAGATCTAAT  
CTTAGTACCGGTAAGCAGGCTGCTGAAATGATAAAGAGGCGTGCTAATGCGTCAGGAATAATTCAAGCCAC  
AAGAGATAATGTTCTGACTGTTGATTCAATTATAATGAATTACGGTAAAGGAACACGCTGTCAGTTCAAAGG  
TTATTTATCGACGAAGGTCTGATGTTGCACACTGGTTGTGTGAATTTCTTGTTTCTATGTCTCTGTGCGAAAT  
GCATATGTATATGGAGACACACAACAAATTCATACATCAACAGAGTATCCGGTTTTCCGTACCTGACATTT  
TGCAAAAATAGAGTTGATGAGGTGGAAGTCTGCAAGTACGCTGCGTTGTCCAGCCGACATTACCACTAT  
CTTAACAGAAGGTACGAAGGACATGTCATGTGTACATCGTCGGTTAAAAAGTCAGTTTCTCAGGAAATGGTGA  
GCGGGGCCGCAATGATCAATCCTGTATCTAAGCCATTGAATGGGAAAGTTTTGACTTTCACTCAGTCCGATAA  
AGAGGCGTGCTTTCTCGAGGATATACGGACGTCCATACAGTACATGAGGTACAAGGTGAGACATATGCAGA  
TGTGTGCTTGGTCAGATTGACTCCGACACCTGTATCTATCATCGCAGGAGATAGTCCGCACGTTCTCGTAGCTT  
TGTCAAGGCATACCCAAACATTGAAGTATTACCCGTAGTGATGGATCCTCTTGTAAGTATAATTAGGGATTTA  
GAAAACTTAGTTCTTACTTGTTAGATATGTATAAAGTAGATGCAGGGACCCAATAGCAATTACTGGTAGACT  
CCGTGTTTAAAGGTTCTAATCTTTTTGTTGCAGCACCAAGACTGGAGATATCTCAGATATGCAATTTTACTAT  
GATAAGTGCTCCCAGGTAATAGCACCATGTTAAATACTATGATGCTGTTACCATGAGGTTGACTGACATTT  
TCTTAATGTCAAAGATTGCATATTGGATTTCTCTAAGTCTGTGGCTGCACCGAAGGATCCGATCAAACCACTGA  
TTCCAATGGTACGAACGGCGGCAGAAATGCCACGCCAGACTGGACTATTGGAAAATTTGGTGGCGATGATCA  
AAAGAACTTTAATTCACCGGAGTTATCAGGAATAATCGACATTGAGAATACTGCATCTTTGGTAGTAGATAA  
ATTTTTGATAGTTACTTGCTTAAAGAAAAAGAAAAACCAATAAAAAATGTTTCTTTATTTGTAGAGAGTCTCT  
CAATAGATGGTTAGAGAAGCAGGAGCAAGTGACCATTGGTCAGCTTGCAAGTTTTGATTTTGTGGATCTTCT  
GCCGTTGATCAGTACAGGCATATGATTAAGCGCAACCTAAGCAGAAGCTGGATACATCAATTCAAAGCGAAT  
ATCCGGCCTTGACAGCAGATTGTGTATCATTCAAAAAAGATCAACGCAATCTTCGGTCTTTGTTCACTGAGCTC  
ACAAGGCAAATGCTCGAAAGCATAGACTCAAGTAAGTTTTTGTCTTTACAAGGAAGACGCCAGCTCAAATCG  
AGGATTTCTTCGGAGATCTCGATAGCCATGTCCTATGGATATCTTGAGTTGGATATTTGAAGTATGACAAA  
TCTCAGAACGAGTTCCACTGTGAGTAGAGTATGAAATATGGAGAAGACTTGGAATAGAAGATTTCTGGGA

GAAGTTTGGAACAAGGCCACAGAAAACTACTCTTAAAGATTACACAGCTGGTATTAACCGTGTTTATGGT  
ACCAGAGAAAGAGTGGGGACGTTACAACATTCATCGGTAATACGGTGATTATTGCTGCTTGTAGCTTCCAT  
GTTGCCCATGGAGAAAATAATCAAAGGTGCATTTTGGGAGATGACAGTTTACTATACTTCCCAAAGGTTGT  
GAGTTTCCCGACATACAGCATACAGCTAACCTTATGTGGAATTTGAGGCTAAGCTATTCAGAAAGCAGTATG  
GTTATTTCTGTGGAAGGTACGTGATACATCATGACAGAGGGTGTATTGTTTATTACGACCTTTGAAGTTGATT  
TCTAAACTTGGTGCTAAACACATCAAGGATTGGGATCACTTAGAAGAGTTCAGAAGATCCCTTTGTGATGTTG  
CAATTCGTTGAACAACCTGTGCGTATTACACGCAGTTGGACGACGCTGTGAGTGAGGTCCATAAAACCGCACC  
CCCGGGTTCGTTTGTATAAAAGTTTAGTTAAATATCTGTCCGATAAGGTTCTTTTAGAAGTTTGTATAGA  
TGGCTCTTGTAAGGGTAAAGTCAATATTAATGAGTTCATAGACTTGTCAAAATCAGAAAAATTTTCCCGTCT  
ATGTTACACCTGTTAAGAGTGTGATCTCCAAGGTTGATAAGATATTGGTTCATGAAGATGAATCTTTGTC  
CGAAGTCAATTTACTCAAAGGTGTAACCTCATTAATGGTGGCTATGTACATCTTGCTGGTCTGTAGTGACAG  
GTGAATGGAATTTGCCAGATAATTGTCGTGGTGGTGTGAGTGTCTGTTGGTCGATAAGAGAATGGAGAGAG  
CGGACGAGGCAACTCTTGCTTCATACTATACCGCAGCGGCTAAGAAAAGGTTTCAGTTCAAAGTCGTTCCAAA  
TTACAACATCACTACCAAGGACGCAGAAAAGGCAGTTTGGCAAGTACTAGTTAATATTAGAAATGTTAAAATT  
GCTGCGGGTACTGTCCGCTGTCATTAGAATTTGTGTCAGTGTGTATTGTTTATAAAAATATTATAAACTCGG  
TTTGAGAGAGAAAATTACGAGCGTCACGGAAGGAGGGCCCATGGAATATCAGAAGAAGTTGTTGATGAGTT  
CATGGAAGAAGTCCCGATGTCTGTAAGGCTTGCAAAATTCGTTTGAAGACCGGGAAAAAGTTTAGTAGTAA  
AAGTGAGAATAATAGTGGAATAATAGGCCGAAACCAGACAAAAACCAAAGGAAGGAAAAGGGTTTAAAG  
TTAGGGTTGAGAAGGATAATTTAATTGATAATGAATTGGAGACTTACGTCGCCGATTGAGATTTCGTATTAAT  
ATGTCTTACACAATCGCAACTCCATCGCAATTTGTGTTTTGTGTCATCAGCATGGGCCGACCCTATAGAATTAATA  
AATTTATGTACTAATTCAGTGGCAATCAGTTCCAAACACAACAAGCTAGAACAACCGTTCAACGGCAATTTAG  
CGAAGTGTGGAACCTGTCCCTCAAGTCACTGTTAGGTTTCTGACAGTGGTTTTAAGGTGTATAGGTACAAT  
GCGGTACTAGATCCTCTAGTTACTGCTTTGTTGGGAGCTTTCGATACTAGAAATAGGATTATAGAAGTCGAAA  
ATCAGGCGAACCCGACAACCGCCGAAACGTTAGACGCTACTCGTAGAGTAGATGACGCAACGGTGGCTATAA  
GGAGCGCTATAAATAATTTAGTAGTAGAATTGGTCAAAGGAACAGGTTTGTACAATCAGAGCACATTTGAAA  
GTGCATCCGGTTTACAATGGTCCTCTGCACCTGCATCTTGA

#MW314132

1

ATGGCATACACACAGACAGCTACCACATCCGCTTTGCTCGACACTGTCCGAGGTAACAATACCTTGGTCAACG  
ATCTTGCGAAGCGGCGTCTTTATGACACAGCGGTGCGACGAGTTCAACGCTCGTGATCGCAGGCCCAAAGTAA  
ATTTTTCCAAAGTAATAAGTGAGGAACAGACGCTTATTGCTACTAGGGCATATCCTGAATTCCAGATAACCTTC  
TATAATACGCAGAACGCCGTGCATTGCTTGGCGGTGGACTACGATCCTTAGAACTGGAATATCTAATGATGC  
AGATCCCGTACGGATCACTCACATATGATATAGGTGGGAATTTTGCATCTCATCTGTTCAAGGGACGGGCATA  
TGTTCACTGCTGTATGCCAATCTTGATGTCCGCGACATAATGCGGCACGAAGGCCAGAAAGACAGTATAGAA  
TTATACCTTTCCAGGCTTGAGCGGGGCAACAAAGTTGTCCCAAATTTCCAAAAGGAAGCTTTTGACAGATACG  
CTGAAACGCCAGACGAAGTTGTCTGTACAGTACCTTCCAAACGTGTACGCACCAGCAGGTGGAAAACACAG  
GCAGGGTGTATGCTATTGCATTGCACAGTATATACGATATACCTGCTGATGAATTCGGAGCGGCACTTTTAAG  
GAAAAATGTCCATGTTTGTACGCCGCTTCCACTTTTCCGAGAATTTACTTCTCGAAGATTCACACGTCAACCT  
TGACGAAATCAACGCGTGTTTTTCGCGTGATGGAGACAAGCTGACTTTTTCTTTCGCATCTGAGAGCACTTTAA  
ATTATTGTCATAGTTATTCTAATATTTTAAAATACGTGTGCAAACTTACTTCCCGGCATCTAATAGAGAGGTCT  
ACATGAAGGAGTTTTTGGTCACCAGGGTTAACACCTGGTTTTGTAAGTTTTCTAGGATAGATACTTTTTATTAT  
ACAAGGGGGTAGCCCAAAAGGTGTAATAGTGAGCAATTTTACAGCGCAATGGAAGATGCATGGCACTACA  
AAAAGACTCTTGCAATGTGTAACAGCGAGAGGATTCTTCTGAAGATTCCTCATCGGTCAATTACTGGTCCCA

AAAATGAGAGATATGGTCATAGTTCCTCTATTTCGACATATCTCTCGACACTAGTAAAAGGACCCGCAAAGAAG  
TCTTAGTGTCAAAGGATTTTGTATTACAGTTTTAAATCACATTCGCACTTATCAAGCCAAGGCACCTACATACT  
CCAATGTTTTATCCTTTGTGAATCAATTCGTTCAAGGGTAATTATCAACGGAGTGACTGCCAGGTCTGAGTGG  
GATGTTGACAAATCTCTTTTGAATCCTTGTCCATGACATTTTTCTTGCACTAAGCTTGCCGTTTTAAAAGAC  
GAATTGTTAATCAGCAAGTTTAGTTTGGGGCCAAAATCAGTAAGCCAGCATGTATGGGATGAGATTTCCCTGG  
CTTTTGAAACGCATTTCCATCGATCAAGGAGAGACTGCTAAATCGGAACTAATTAAAGTGTCGGGAGACGC  
ATTAGAAATCAGGGTGCCTGATTTATATGTGACTTTTCACGATAGATTAGTGACTGAGTACAAAACATCGGTG  
GATATGCCAGTGCTTGATATCAGAAAGAGAATGGAGGAGACTGAGGTTATGTACAATGCATTGTCTGAGCTA  
TCTGTGCTCAAGGAGTCGGACAAGTTCGACGTTGATGTTTTTCCCGGATGTGCCAGACTTTGGAGGTAGACC  
CAATGACTGCAGCAAAGGTTATTGTGGCAGTGATGAGCAACGAGAGCGGACTGACTCTTACATTGCAACAGC  
CAACTGAAGCAAATGTCGATTGGCACTTAAAGATTGAGAAAAAGCCTCTGAGGGTGCAGTGTGTTACTTC  
TAGAGATGTTGAAGAACCATCCATGAAGGGTCAATGGCAAGAGGAGAGTTACAATTGGCCGGTCTGTCTGG  
AGACCAACCAGAGTCTTCCTATACTCGGAACGAGGAAATAGAGTCATTAGAGCAATTCCACATGGCAACGGCT  
GGTTCGTTAATTCGGAAACAGATGAGTTCGATTGTGTACACGGGCCCATTAAGTTTCAGCAAATGAAAACT  
TTATTGATAGCCTGGTAGCATCACTCTCTGCTGCGGTGTGCAACCTAGTCAAGATCCTAAAGGATACAGCTGCT  
ATAGATCTCGAAACCCGTCAGAAGTTTGGAGTCTTAGATGTTGCGACCAAAGATGGTTAATTAACCTTTAG  
CCAAGAATCACGCATGGGGCGTTATTGAAACACATGCTAGGAAGTACCACGTTGCACTTTTGGAGTATGATGA  
GCATGGAGTGGTAACTTGCAGAGTTGGAGAAGGGTGGCCGTGAGTTCTGAGTCAATGGTTTATTCTGATAT  
GGCAAAGCTCAGAACACTGAGGAGATTGTTAAGAGATGGTGAGCCTCATGTCAGCAGTGCTAAAGTCGTCT  
AGTTGACGGTGTCCCGGGTTGTGGAAAGACAAAAGAGATTCTCTCGAAAGTAAATTTTGAGGAAGATCTAAT  
CTTAGTACCGGTAAGCAGGCTGCTGAAATGATAAAGAGGCGTGCTAATGCGTCAGGAATAATTCAAGCCAC  
AAGAGATAATGTTCTGACTGTTGATTCAATTATAATGAATTACGGTAAAGGAACACGCTGTCAGTTCAAAGG  
TTATTTATCGACGAAGGTCTGATGTTGCACACTGGTTGTGTGAATTTCTTGTCTATGTCTCTGTGCGAAATT  
GCATATGTTTATGGAGACACACAACAAATTCCATACATCAACAGAGTATCCGGTTTTCCGTACCCTGCACATTT  
TGCAAAAATAGAGTTGATGAGGTGGAACTCGCAGAACTACGTCGTTGTCCAGCCGACATTACCCACTAT  
CTTAACAGAAGGTACGAAGGACATGTCATGTGTACATCGTCGGTTAAAAAGTCAGTTTCTCAGGAAATGGTGA  
GCGGGGCCGCAATGATCAATCCTGTATCTAAGCCATTGAATGGGAAAGTTTTGACTTTCACTCAGTCTGATAA  
AGAGGCGCTGCTTCTCGAGGATATACGGACGTCCATACAGTACATGAGGTACAAGGTGAGACATATGCAGA  
TGTGTGCTTGGTCAGATTGACTCCGACACCTGTATCTATCATCGCAGGAGATAGTCCGCACGTTCTCGTAGCTT  
TGTCAAGGCATACCCAAACATTGAAGTATTACCCGTAGTGATGGATCCTCTTGTAAGTATAATTAGGGATTTA  
GAAAACTTAGTTCTTACTTGTTAGATATGTATAAAGTAGATGCAGGGACCCAATAGCAATTACAGGTAGACT  
CCGTGTTTAAAGGTTCTAATCTTTTTGTTGCAGCACCAAGACTGGAGATATCTCAGATATGCAATTTTACTAT  
GATAAGTGCTCCCAGGTAATAGCACCATGTTAAATAACTATGATGCTGTTACCATGAGGTTGACTGACATTC  
TCTTAATGTCAAAGATTGCATATTGGATTTCTCTAAGTCTGTGGCTGCACCGAAGGATCCGATCAAACCACTGA  
TTCCAATGGTACGAACGGCGGCAGAAATGCCACGCCAGACTGGACTATTGGAAAATTTGGTGGCGATGATCA  
AAAGAACTTTAATTCACCGGAGTTATCAGGAATAATCGACATTGAGAATACTGCATCTTTAGTAGTAGATAA  
ATTTTTGATAGTTACTTGCTTAAAGAAAAAGAAAACCAATAAAAAATGTTTCTTTATTTGTAGAGAGTCTCT  
CAATAGATGGTTAGAGAAGCAGGAGCAAGTGACCATTGGTCAGCTTGCAAGTTTTGATTTTGTGGATCTTCT  
GCCGTTGATCAGTACAGGCATATGATTAAGCGCAACCTAAGCAGAAGCTGGATACATCAATTCAAAGCGAAT  
ATCCGGCCTTGCAAGCAGATTGTGTATCATTGAAAAAGATCAACGCAATCTTCGGTCTTTGTTGAGTGAGCTC  
ACAAGGCAAATGCTCGAAAGCATAGACTCAAGTAAGTTTTTGTCTTTACAAGGAAGACGCCAGCTCAAATTG  
AGGATTTCTTCGGAGATCTCGATAGCCATGTCCCTATGGATATCTTGGAGTTGGATATTTGGAAGTATGACAAA  
TCTCAGAACGAGTTCCACTGTGCAGTAGAGTATGAAATATGGAGAAGACTTGGATTAGAAGATTTTCTGGGA  
GAAGTTTGAAACAAGGCCACAGGAAAACACTCTTAAAGATTACACAGCTGGTATTAACCGTGTATGTTATGGT  
ACCAGAGAAAGAGTGGGGACGTTACAACATTCGGAATAACGGTGATTATTGCTGCTTGTAGCTTCCAT  
GTTGCCCATGGAGAAAATAATCAAAGGTGCATTTTTCGGAGATGACAGTTTACTATACTTCCAAAAGGTTGT  
GAGTTTCTGACATACAGCATACAGCCAACCTTATGTGGAATTCGAGGCTAAGCTATTCAGAAAGCAGTATG  
GTTATTTCTGTGGAAGGTACGTGATACATCATGACAGAGGGTGTATTGTTTATTATGACCTTTGAAGTTGATT

TCTAAACTTGGTGCTAAACACATCAAGGATTGGGATCACTTAGAAGAGTTCAGAAGATCCCTTTGTGATGTTG  
CAAATTCGTTGAACAACTGTGCGTATTACACGCAGTTGGACGACGCTGTGAGTGAGGTCCATAAAACCGCACC  
CCCGGGTTCGTTTGTATATAAAAGTTTAGTTAAATATCTGTCCGATAAGGTTCTTTTAGAAGTTTGTATAGA  
TGGCTCTTGTTAAGGGTAAAGTCAATATTAATGAGTTCATAGACTTGTCAAATCAGAAAAATTTCTCCGTCT  
ATGTTACACCTGTTAAGAGTGTCATGATCTCCAAGGTTGATAAGATATTGGTTCATGAAGATGAATCTTTGTC  
CGAAGTCAATTTACTCAAAGGTGTAAACTCATTGATGGTGGCTATGTACATCTTGCTGGTCTTGTTGGTGACA  
GGTGAATGGAATTTGCCAGATAATTGTCGTGGTGGTGTGAGTGTCTGTTTGGTCGATAAAAGAATGGAGAGA  
GCGGACGAGGCAACTCTTGCTTCATACTATACCGCAGCGGCTAAGAAAAGGTTTCAGTTCAAAGTCGTTCCAA  
ATTACAACATCACTACCAAGGACGCAAAAAAGGCAGTTTGGCAAGTACTAGTTAATATTAGAAATGTTAAAT  
TGCTGCGGGTACTGTCCGCTGTCATTAGAATTTGTGTGAGTGTGATTGTTTATAAAAAATATTATAAACTCG  
GTTTGAGAGAGAAAATTACGAGCGTAACGGATGGAGGGCCCATGGAAGTATCAGAAGAAGTTGTTGATGAG  
TTCATGGAAGAAGTCCCGATGTCTGTAAGGCTTGCAAAATTTCTGTTGAAGACCGGGAAAAAGTTTAGTAGTA  
AAAGTGAGAATAATAGTGGTAATAATAGGCCGAAACCAAACAAAAACCAAAGGAAGGAAAAGGGTTTAAAA  
GTTAGGGTTGAGAAGGATAATTTAATTGATAATGAATTGGAGACTTACGTCGCCGATTGAGATTCGTATTTAA  
TATGTCTTACACAATCGCAACTCCATCGCAATTTGTGTTTTTGTGTCATCAGCATGGGCCGACCCTATAGAATTAAT  
AAATTTATGTACTAATTCAGTAAATCAATTCAAACACAACAAGCTAGAACAACCGTTCAACGGCAATTTA  
GCGAAGTGTGGAAACCTGTCCCTCAAGTCACTGTTAGGTTTCTGACAGTGGTTTTAAGGTGTATAGGTACAA  
TGCGGTACTAGATCCTCTAGTTACTGCTTTGTTAGGAGCTTCGATACTAGAAATAGGATTATAGAAGTCGAAA  
ATCAGGCGAACCCGACAACCGCCGAAACGTTAGACGCTACTCGTAGAGTAGATGACGCAACGGTGGCTATAA  
GGAGCGCTATAAATAATTTAGTAGTAGAATTGGTCAAAGGAACAGGTTTGTACAATCAGAGCACATTTGAAA  
GTGCATCCGGTTTACAATGGTCCTCTGCACCTGCATCTTGA

#MW314136

1

ATGGCATACACACAGACAGCTACCACATCCGCTTTGCTCGACACTGTCCGAGGTAACAATACCTTGGTCAACG  
ATCTTGCGAAGCGGCGTCTTTATGACACAGCGGTGACGAGTTCAACGCTCGTGATCGCAGGCCCAAAGTAA  
ATTTTTCCAAAGTAATAAGTGAGGAACAGACGCTTATTGCTACTAGGGCATATCCAGAATTCCAGATAACCTTT  
TATAATACGCAGAACGCCGTGCATTGCTTGCCGGTGGACTACGATCCTTAGAACTGGAATATCTAATGATGC  
AGATCCCGTACGGATCACTCACATATGATATAGGTGGGAATTTTGCATCTCATCTGTTCAAAGGACGGGCATA  
TGTTCACTGCTGTATGCCAATCTTGATGTCCGCGACATAATGCGGCACGAAGGCCAGAAAGACAGTATAGAA  
TTATACCTTTCCAGGCTTGAGCGGGGCAACAAAGTTGTCCCAAATTTCCAAAAGGAAGCTTTTGACAGATACG  
CTGAAACGCCAGACGAAGTTGTCTGTACAGTACCTTCCAAACGTGTACGCACCAGCAGGTGGAAAACACAG  
GCAGGGTGTATGCTATTGCACTGCACAGTATATACGATATACCTGCTGATGAATTCGGAGCGGCACTTTTAAG  
GAAAAATGTCCATGTTTGTACGCCGCTTCCACTTTTCCGAGAATTTACTTCTCGAAGATTACACGTCAACCT  
TGACGAAATCAATGCGTGTTTTTCGCGTGATGGAGACAAGCTGACTTTTTCTTCGCATCTGAGAGCACTTTAA  
ATTATTGTCATAGTTATTCTAATATTTTAAAATACGTGTGCAAACTTACTTCCCGGCATCTAATAGAGAGGTCT  
ACATGAAGGAGTTTTTGGTCACCAGGGTTAACACCTGGTTTTGTAAGTTTTCTAGGATAGATACTTTTTATTAT  
ACAAGGGGGTAGCCTACAAAGGTGTAAATAGTGAGCAATTTTACAGCGCAATGGAAGATGCATGGCACTACA  
AAAAGACTCTTGCAATGTGTAAACAGCGAGAGGATTCTTCTGAAGATTCCTCATCGGTCAATTACTGGTTCCCA  
AAAATGAGAGATATGGTCATAGTTCTCTATTGACATATCTCTCGACACCAGTAAAAGGACCCGCAAAGAAG  
TCTTAGTGCAAAGGATTTTGTATTACAGTTTTTAAATCACATTCGCACTTATCAAGCCAAGGCACTTACATACT  
CCAATGTTTTATCCTTTGTGAATCAATTCGTTCAAGGGTAATTATCAACGGAGTGACTGCCAGGTCTGAGTGG  
GATGTTGACAAATCTTTTGAATCCTTGTCATGACATTTTCTTGCACTAAGCTTGCCGTTTTAAAAGAC  
GAATTGTTAATCAGCAAGTTTAGTTTGGGGCCAAAATCAGTAAGCCAGCATGTATGGGATGAGATTTCCCTGG

CTTTTGGAACGCATTTCCATCGATCAAGGAGAGACTGCTAAATCGGAACTAATTAAAGTGTCGGGAGACGC  
ATTAGAAATCAGGGTGCCTGATTTATATGTGACTTTTCACGATAGATTAGTGGCTGAGTACAAAACATCGGTG  
GATATGCCAGTGCTTGATATCAGAAAGAGAATGGAGGAGACTGAGGTTATGTACAATGCATTGTCTGAGCTA  
TCTGTGCTCAAGGAGTCGGACAAGTTTCGACGTTGATGTTTTTCCCGGATGTGCCAGACTTTGGAGGTAGACC  
CAATGACTGCAGCAAAGGTTATTGTGGCAGTGATGAGCAACGAGAGCGGACTGACTCTTACATTGGAACAGC  
CAACTGAAGCAAATGTCGATTGGCACTTAAAGATTGAGAAAAAGCCTCTGAGGGTGCCTAGTGGTTACTTC  
TAGAGATGTTGAAGAACCATCCATGAAGGGTTCAATGGCAAGAGGAGAGTTACAATTGGCCGGTCTGTCTGG  
AGACCAACCAGAGTCTTCCTATACTCGGAACGAGGAAATAGAGTCATTAGAGCAATTCCACATGGCAACGGCT  
AGTTCGTTAATTCGGAAACAGATGAGTTCGATTGTGTACACGGGCCCATTAAGTTGAGCAAATGAAAACT  
TTATTGATAGCCTGGTAGCATCACTCTCTGCTGCGGTGTGCAACCTAGTCAAGATCCTAAAGGATACAGCTGCT  
ATAGATCTCGAAACCCGTCAGAAGTTTGGAGTCTTAGATGTTGCGACCAAAAGATGGTTAATTAACCTTTAG  
CCAAGAATCACGCATGGGGCGTTATTGAAACACATGCTAGGAAGTACCACGTTGCACTTTTGGAGTATGATGA  
GCATGGAGTGGTAACTTGCACAGTTGGAGAAGGGTGGCCGTGAGTTCTGAGTCAATGGTTTATTCTGATAT  
GGCAAAGCTCAGAACACTGAGGAGATTATTAAGAGATGGTGAGCCTCATGTCAGCAGTGCTAAAGTCGTCT  
AGTTGACGGTGTCCCGGTTGTGGAAAGACAAAAGAGATTCTCTCGAAAGTAAATTTGAGGAAGATCTAAT  
CTTAGTACCGGTAAGCAGGCTGCTGAAATGATAAAGAGGCGTGCTAATGCGTCAGGAATAATTCAAGCCAC  
AAGAGATAATGTTGCACTGTTGATTCAATTAATGAATTACGGTAAAGGAACACGCTGTCAGTTCAAAAGG  
TTATTTATCGACGAAGGTCTGATGTTGCACACTGGTTGTGTGAATTTCTTGTCTATGTCTCTGTGCGAAATT  
GCATATGTTTATGGAGACACACAACAAATTCCATACATCAACAGAGTATCCGGTTTTCCGTACCCTGCACATTT  
TGCAAAAATAGAGTTGATGAGGTGGAACTCGCAGAACTACGCTGCGTTGTCCAGCCGACATTACCCACTAT  
CTTAACAGAAGGTACGAAGGACATGTCATGTGTACATCGTCGGTTAAAAAGTCAGTTTCTCAGGAAATGGTGA  
GCGGGGCCGCAATGATCAATCCTGTATCTAAGCCATTGAATGGGAAAGTTTTGACTTTCACTCAGTCTGATAA  
AGAGGCGTGCTTTCTCGAGGATATACGGACGTCCATACAGTACATGAGGTACAAGGTGAGACATATGCAGA  
TGTGTGCTTGGTCAGATTGACTCCGACACCTGTATCTATCATCGCAGGAGATAGTCCGCACGTTCTCGTAGCTT  
TGTCAAGGCATACCCAAACATTGAAGTATTACACCGTAGTGATGGATCCTCTTGTAAGTATAATTAGGGATTTA  
GAAAACTTAGTTCTTACTTGTTAGATATGTATAAAGTAGATGCAGGGACCCAATAGCAATTACAGGTAGACT  
CCGTGTTTAAAGGTTCTAATCTTTTTGTTGCAGCACCAAGACTGGAGATATCTCAGATATGCAATTTTACTAT  
GATAAGTGCTCCCAGGTAATAGCACCATGTTAAATACTATGATGCTGTTACCATGAGGTTGACTGACATTTCT  
TCTAATGTCAAAGATTGCATATTGGATTTCTCTAAGTCTGTGGCTGCACCGAAGGATCCGATCAAACCACTGA  
TTCCAATGGTACGAACGGCGGCAGAAAAGCCACGCCAGACTGGACTATTGGAAAATTTGGTGGCGATGATCA  
AAAGAACTTTAATTCACCGGAGTTATCAGGAATAATCGACATTGAGAATACTGCATCTTTAGTAGTAGATAA  
ATTTTTGATAGTTACTTGCTTAAAGAAAAAGAAAACCAAATAAAAATGTTTCTTTATTTGTAGAGAGTCTCT  
CAATAGATGGTTAGAGAAGCAGGAGCAAGTGACCATTGGTCAGCTTGACAGATTTTGATTTGTGGATCTTCT  
GCCGTTGATCAGTACAGGCATATGATTAAAGCGCAACCTAAGCAGAAGCTGGATACATCAATTCAAAGCGAAT  
ATCCGGCCTTGACAGACGATTGTGTATCATTCGAAAAAGATCAACGCAATCTTCGGTCTTTGTTGAGTGAGCTC  
ACAAGGCAAATGCTCGAAAGCATAGACTCAAGTAAGTTTTGTTCTTTACAAGGAAGGCGCCAGCTCAAATTG  
AGGATTTCTTCGGAGATCTCGATAGCCATGTCCCTATGGATATCTTGGAGTTGGATATTCGAAGTATGACAAA  
TCTCAGAACGAGTTCCACTGTGCAGTAGAGTATGAAATATGGAGAAGACTTGGATTAGAAGATTTTCTGGGA  
GAAGTTTGAAACAAGGCCACAGAAAACTACTCTTAAAGATTACACAGCTGGTATTAACAGTGTATGGT  
ACCAGAGAAAGAGTGGGGACGTTACAACATTATCGGTAATACGGTGATTATTGCTGCTTGTAGCATCCAT  
GTTGCCCATGGAGAAAATAATCAAAGGTGCATTTTTCGGAGATGACAGTTTACTATACTTCCAAAAGGTTGT  
GAGTTTCTGACATACAGCATACAGCCAACCTTATGTGGAATTCGAGGCTAAGCTATTCAGAAAGCAGTATG  
GTTATTTCTGTGGAAGGTACGTGATACATCACGACAGAGGGTGTATTGTTTATTATGACCTTTGAAGTTGATT  
TCTAAACTTGGTGCTAAACACATCAAGGATTGGGATCACTTAGAAGAGTTCAGAAGATCCCTTTGTGATGTTG  
CAAATTCGTTGAACAACTGTGCGTATTACACGCAGTTGGACGACGCTGTGAGTGAGGTCCATAAAACCGCACC  
CCCGGTTTCGTTTGTATATAAAAGTTTAGTTAAATATCTGTCCGATAAGGTTCTTTTTAGAAGTTTGTATAGA  
TGGCTCTTGTTAAGGGTAAAGTCAATATTAATGAGTTCATAGACTTGTCAAATCAGAAAAATTTCTCCGTCT  
ATGTTACACCTGTTAAGAGTGTGATGATCTCAAGGTTGATAAGATATTGGTTCATGAAGATGAATCTTTGTC

CGAAGTCAATTTACTCAAAGGTGTAAACTCATTGATGGTGGCTATGTACATCTTGCTGGTCTTGTTGGTGACA  
GGTGAATGGAATTTGCCAGATAATTGTCGTGGTGGTGTCAAGTGTCTGTTTGGTCGATAAGAGAATGGAGAGA  
GCGGACGAGGCAACTCTTGCTTCATACTATACCGCAGCGGCTAAGAAAAGGTTTCAGTTCAAAGTCGTTCCAA  
ATTACAACATCACTACCAAGGACGCAGAAAAGGCAGTTTGGCAAGTACTAGTTAATATTAGAAATGTTAAAT  
TGCTGCGGGTTACTGTCCGCTGTCATTAGAATTTGTGTCAAGTGTGTATTGTTTATAAAAAATATTATAAACTCG  
GTTTGAGAGAGAAAATTACGAGCGTCACGGATGGAGGGCCTATGGAAGTATCAGAAGAAGTTGTTGATGAGT  
TCATGGAAGAAGTCCCGATGTCTGTAAGGCTTGCAAAATTTCTGTTGGAAGACCGGAAAAAAGTTTAGTAGTAA  
AAGTGAGAATAATAGTGGAATAATAGGCCGAAACCAACAAAAACCAAGGAAGGAAAAAGGGTTTAAAG  
TTAGGGTTGAGAAGGATAATTTAATTGATAATGAATTGGAGACTTACGTCGCCGATTACAGATTTCGTATTAAAT  
ATGTCTTACACAATCGCAACTCCATCGCAATTTGTGTTTTTGTTCATCAGCATGGGCCGACCCTATAGAATTAATA  
AATTTATGTACTAATTCAGTAGGTAATCAGTTCCAAACACAACAAGCTAGAACAAACCGTTCAACGGCAATTTAG  
CGAAGTGTGGAACCTGTCCCTCAAGTCACTGTTAGGTTTCTGACAGTGGTTTTAAGGTGTATAGGTACAAT  
GCGGTACTAGATCCTCTAGTTACTGCTTTGTTAGGAGCTTTCGATACTAGAAATAGGATTATAGAAGTCGAAA  
ATCAGGCGAACCCGACAACCGCCGAAACGTTAGACGCTACTCGTAGAGTAGATGACGCAACGGTGGCTATAA  
GGAGCGCTATAAATAATTTAGTAGTAGAATTGGTCAAAGGAACAGGTTTGTACAATCAGAGCACATTTGAAA  
GTGCATCCGGTTTACAATGGTCCTCTGCACCTGCATCTTGA

#MZ004925

1

ATGGCATACACACAGACAGCTACCACATCCGCTTTGCTCGACACTGTCCGAGGTAACAATACCTTGGTCAACG  
ATCTTGCGAAGCGGCGTCTTTATGACACAGCGGTGACGAGTTCAACGCTCGTGATCGCAGGCCCAAAGTAA  
ATTTTTCCAAAGTAATAAGTGAGGAACAGACGCTTATTGCTACTAGGGCATATCCAGAATTCCAGATAACCTTC  
TATAATACGCAGAACGCCGTGCATTGCTTGCCGGTGGACTACGATCCTTAGAACTGGAATATCTAATGATGC  
AGATCCCGTACGGATCACTCACATATGATATAGGTGGGAATTTTGCATCTCATCTGTTCAAAGGACGGGCATA  
TGTTCACTGCTGTATGCCAATCTTGATGTCCGCGACATAATGCGGCACGAAGGCCAGAAAGACAGTATAGAA  
TTATACCTTTCCAGGCTTGAGCGGGGCAACAAAGTTGTCCCAAATTTCCAAAAGGAAGCTTTTGACAGATACG  
CTGAAACGCCAGACGAAGTTGTCTGTACAGTACCTTCCAAACGTGTACGCACCAGCAGGTGGAAAACACAG  
GCAGGGTGTATGCTATTGCATTGCACAGTATATACGATATACCTGCTGATGAATTCGGAGCGGCACTTTTAAG  
GAAAAATGTCCATGTTTGTACGCCGCCTTCCACTTTTCCGAGAATTTACTTCTCGAAGATTCACACGTCAACCT  
TGACGAAATCAACGCGTGTTTTTCGCGTGATGGAGACAAGCTGACTTTTTCTTTCGCATCTGAGAGCACTTTAA  
ATTATTGTCATAGTTATTCTAATATTTTAAAATACGTGTGCAAACTTACTTCCCGGCATCTAATAGAGAGGTCT  
ACATGAAGGAGTTTTTGGTCACCAGGGTTAACACCTGGTTTTGTAAGTTTTCTAGGATAGATACTTTTTTATTAT  
ACAAGGGGGTAGCCCAAAAGGTGTAAATAGTGAGCAATTTTACAGCGCAATGGAAGATGCATGGCACTACA  
AAAAGACTCTTGCAATGTGTAACAGCGAGAGGATTCTTCTTGAAGATTCCTCATCGGTCAATTACTGGTTCCCA  
AAAATGAGAGATATGGTCATAGTTCTCTATTTCGACATATCTCTCGACACCAGTAAAAGGACCCGCAAAGAAG  
TCTTAGTGTCAAAGGATTTTGTATTACAGTTTTTAAATCACATTCGCACTTATCAAGCCAAGGCACTTACATACT  
CCAATGTTTTATCCTTTGTGAATCAATTCGTTCAAGGGTAATTATCAACGGAGTGACTGCCAGGTCTGAGTGG  
GATGTTGACAAATCTTTTGAATCCTTGTCATGACATTTTCTTGCACTAAGCTTGCCGTTTTTAAAGAC  
GAATTGTTAATCAGCAAGTTTAGTTTGGGGCCAAAATCAGTAAGCCAGCATGTATGGGATGAGATTTCCCTGG  
CTTTTGAAACGCATTTCCATCGATCAAGGAGAGACTGCTAAATCGGAACTAATTAAGTGTGGGAGACGC  
ATTAGAAATCAGGGTGCCTGATTTATATGTGACTTTTACGATAGATTAGTGACTGAGTACAAAACATCGGTG  
GATATGCCAGTGCTTGATATCAGAAAGAGAATGGAGGAGACTGAGGTTATGTACAATGCATTGTCTGAGCTA  
TCTGTGCTCAAGGAGTCGGACAAGTTTCGACGTTGATGTTTTTCCCGGATGTGCCAGACTTTGGAGGTAGACC  
CAATGACTGCAGCAAAGGTTATTGTGGCAGTGATGAGCAACGAGAGCGGACTGACTCTTACATTGCAACAGC

CAACTGAAGCAAATGTCGCATTGGCACTTAAAGATTTCAGAAAAAGCCTCTGAGGGTGCCTAGTGGTACTTC  
TAGAGATGTTGAAGAACCATCCATGAAGGGTTCATGGCAAGAGGAGAGTTACAATTGGCCGGTCTGTCTGG  
AGACCAACCAGAGTCTTCCTATACTCGGAACGAGGAAATAGAGTCATTAGAGCAATTCACATGGCAACGGCT  
AGTTCGTTAATTCGGAACAGATGAGTTCGATTGTGTACACGGGCCCATTAAGTTCAGCAAATGAAAACT  
TTATTGATAGCCTGGTAGCATCACTCTCTGCTGCGGTGTGCAACCTAGTCAAGATCCTAAAGGATACAGCTGCT  
ATAGATCTCGAAACCCGTCAGAAGTTTGGAGTCTTAGATGTTGCGACCAAAGATGGTTAATTAACCTTTAG  
CCAAGAATCACGCATGGGGCGTTATTGAAACACATGCTAGGAAGTACCACGTTGCACTTTTGGAGTATGATGA  
GCATGGAGTGGTAACTTGCACAGTTGGAGAAGGGTGGCCGTGAGTTCTGAGTCAATGGTTTATTCTGATAT  
GGCAAAGCTCAGAACACTGAGGAGATTATTAAGAGATGGTGAGCCTCATGTCAGCAGTGCTAAAGTCGTCT  
AGTTGACGGTGTCCCGGGTTGTGGAAAGACAAAAGAGATTCTCTCGAAAGTAAATTTTGAGGAAGATCTAAT  
CTTAGTACCGGGTAAGCAGGCTGCTGAAATGATAAAGAGGCGTGCTAATGCGTCAGGAATAATTCAAGCCAC  
AAGAGATAATGTTCTGACTGTTGATTCAATTTATAATGAATTACGGTAAAGGAACACGCTGTCAGTTCAAAGG  
TTATTTATCGACGAAGGTCTGATGTTGCACACTGGTTGTGTGAATTTCTTGTTTCTATGTCTCTGTGCGAAAT  
GCATATGTTTATGGAGACACACAACAAATTCATACATCAACAGAGTATCCGGTTTTCCGTACCCTGCACATTT  
TGCAAAAATAGAGGTTGATGAGGTGGAACTCGCAGAACTACGCTGCGTTGTCCAGCCGACATTACTCACTAT  
CTTAACAGAAGGTACGATGGACATGTCATGTGTACATCGTCGGTTAAAAAGTCAGTTTCTCAGGAATGGTGA  
GCGGGGCCGCAATGATCAATCCTGTATCTAAGCCATTGAATGGGAAAGTTTTGACTTTCACTCAGTCTGATAA  
AGAGGCGCTGCTTCTCGAGGATATACGGACGTCCATACAGTACATGAGGTACAAGGTGAGACATATGCAGA  
TGTGTCGTTGGTCAGATTGACTCCGACACCTGTATCTATCATCGTAGGAGATAGTCCGCACGTTCTCGTAGCTT  
TGTCAAGGCATACCCAAACATTGAAGTATTACACCGTAGTGATGGATCCTCTTGTAAGTATAATTAGGGATTTA  
GAAAACTTAGTTCTTACTTGTTAGATATGTATAAAGTAGATGCAGGGACCCAATAGCAATTACAGGTAGACT  
CCGTGTTTAAAGGTTCTAATCTTTTTGTTGCAGCACCAAAGACTGGAGATATCTCAGATATGCAATTTTACTAT  
GATAAGTGCTCCCAGGTAATAGCACCATGTTAAATACTATGATGCTGTTACCATGAGGTTGACTGACATTTCT  
TCTTAATGTCAAAGATTGCATATTGGATTTCTCTAAGTCTGTGGCTGCACCGAAGGATCCGATCAAACCACTGA  
TTCCAATGGTACGAACGGCGGCAGAAATGCCACGCCAGACTGGACTATTGGAAAATTTGGTGGCGATGATCA  
AAAGAACTTTAATTCACCGGAGTTATCAGGAATAATCGACATTGAGAATACTGCATCTTTAGTAGTAGATAA  
ATTTTTGATAGTTACTTGCTAAAAGAAAAAGAAAAACCAATAAAAAATGTTTCTTTATTTGTAGAGAGTCTC  
TCAATAGATGGTTAGAGAAGCAGGAGCAAGTGACCATTGGTCAGCTTGCAGATTTTGATTTGTGGATCTTCC  
TGCCGTTGATCAGTACAGGCATATGATTAAAGCGCAACCTAAGCAGAAGCTGGATACATCAATTCAAAGCGAA  
TATCCGGCCTTGACAGCATTGTGTATCATTCGAAAAGATCAACGCAATCTTCGGTCTTTGTTGAGTGAGCT  
CACAAGGCAAATGCTCGAAAGCATAGACTCAAGTAAGTTTTGTTCTTTACAAGGAAGACGCCAGCTCAAATT  
GAGGATTTCTTCGAGATCTCGATAGCCATGTCCCTATGGATATCTTGGAGTTGGATATTTGAAAGTATGACA  
AATCTCAGAACGAGTTCCACTGTGCAGTAGAGTATGAAATATGGAGAAGACTTGGATTAGAAGATTTTCTGG  
GAGAAGTTTGGAAACAAGGCCACAGAAAACTACTCTTAAAGATTACACAGCTGGTATTAACAGTGTATG  
GTACCAGAGAAAGAGTGGGGACGTTACAACATTCATCGTAATACGGTGATTATTGCTGCTTGTAGCTTCC  
ATGTTGCCCATGGAGAAAATAATCAAAGGTGCATTTTTCGGAGATGACAGTTTACTATACTTCCAAAAGGTT  
GTGAGTTTCTGACATACAGCATAACGCCAACCCTATGTGGAATTTTCGAGGCTAAGCTATTCAGAAAGCAGTA  
TGGTTATTTCTGTGGAAGGTACGTGATACATCATGACAGAGGGTGTATTGTTTATTATGACCTTTGAAGTTGA  
TTTCTAAACTTGGTGCTAAACATATCAAGGATTGGGATCACTTAGAAGAGTTTCAGAAGATCCCTTTGTGATGTT  
GCAAATTCGTTGAACAACTGTGCGTATTACACGCAGTTGGACGACGCTGTGAGTGAGGTCCATAAAACCGCAC  
CCCCGGGTTGTTTTGTATATAAAAGTTTAGTTAAATATCTGTCCGATAAGGTTCTTTTTAGAAGTTTGTATAG  
ATGGCTCTTGTTAAGGGTAAAGTTAATATTAATGAGTTCATAGACTTGTCAAATCAGAAAAATTTCTCCGTC  
TATGTTACACCTGTTAAGAGTGTGATCTCCAAGGTTGATAAGATATTGGTTCATGAAGATGAATCTTTGT  
CCGAAGTCAATTTACTTAAAGGTGTAAACTCATTGATGGTGGCTATGTACATCTTGCTGGTCTTGTGGTGACA  
GGTGAATGGAATTTGCCAGATAATTGTCGTGGTGGTGTGAGTGTCTGTTTGGTCGATAAGAGAATGGAGAGA  
GCGGACGAGGCAACTCTTGCTTCATACTATACCGCAGCGGCTAAGAAAAGGTTTCAGTTCAAAGTCGTTCCAA  
ATTACAACATCACTACCAAGGACGCAGAAAAGGCAGTTTGGCAAGTACTAGTTAATATTAGAAATGTTAAAT  
TGCTGCGGGTACTGTCCGCTGTCATTAGAATTTGTGTGAGTGTGATTGTTTATAAAAAATATTATAAACTCG

GTTTGAGAGAGAAAATTACGAGCGTCACGGATGGAGGGCCCATGGAACATCAGAAGAAGTTGTTGATGAG  
TTCATGGAAGAAGTCCCGATGTCTGTAAGGCTTGCAAAATTTCTGTTGGAAGACCGGGAAAAAGTTTAGTAGTA  
AAAGTGAGAATAATAGTGGTAATAATAGGCCGAAACCAACAAAAACCAAGGAAGGAAAAAGGGTTTAAAA  
GTTAGGGTTGAGAAGGATAATTTAATTGATAATGAATTGGAGACTTACGTCGCCGATTCAGATTCGTATTTAA  
TATGTCTTACACAATCGCAACTCCATCGCAATTTGTGTTTTTGTCTATCAGCATGGGCCGACCCTATAGAATTAAT  
AAATTTATGTACTAATTCAGTAGGTAATCAGTTCCAAACACAACAAGCTAGAACAACCGTTCAACGGCAATTTA  
GCGAAGTGTGGAAACCTGTCCCTCAAGTCACTGTTAGGTTTCTGACAGTGGTTTTAAGGTGTATAGGTACAA  
TGCGGTACTAGATCCTCTAGTTACTGCTTTGTTAGGAGCTTCGATACTAGAAATAGGATTATAGAAGTCGAAA  
ATCAGGCGAACCCGACAACCGCCGAAACGTTAGACGCTACTCGTAGAGTAGATGACGCAACGGTGGCTATAA  
GGAGCGCTATAAATAATTTAGTAGTAGAATTGGTCAAAGGAACAGGTTTGTACAATCAGAGCACATTTGAAA  
GTGCATCCGGTTTACAATGGTCCTCTGCACCTGCATCTTGA

#MZ323110

1

ATGGCATACACACAGACAGCTACCACATCCGCTTTGCTCGACACTGTCCGAGGTAACAATACCTTGGTCAATG  
ATCTTGCGAAGCGGCGTCTTTATGACACAGCGGTGACGAGTTCAACGCTCGTGATCGCAGGCCCAAAGTAA  
ATTTTTCCAAAGTAATAAGTGAGGAACAGACGCTTATTGCTACTAGGGCATATCCAGAATTCCAGATAACCTTC  
TATAATACGCAGAACGCCGTGCATTGCTTGCCGGTGGACTACGATCCTTAGAACTGGAATATCTAATGATGC  
AGATCCCGTATGGATCACTCACATATGATATAGGTGGGAATTTTGCATCTCATCTGTTCAAAGGACGGGCATA  
TGTTCACTGCTGTATGCCAATCTTGATGTCCGCGACATAATGCGGCACGAAGGCCAGAAAGACAGTATAGAA  
TTATACCTTTCCAGGCTTGAGCGGGGCAACAAAGTTGTCCCAAATTTCCAAAGGAAGCTTTTGACAGATACG  
CTGAAACGCCAGACGAAGTTGTCTGTACAGTACCTTCCAAACGTGTACGCACCAGCAGGTGGAAAACACAG  
GCAGAGTGTATGCTATTGCATTGCACAGTATATACGATATACCTGCTGATGAATTCGGAGCGGCACTTTTAAG  
GAAAAATGTCCATGTTTGTACGCCGCCTTCCACTTTTCCGAGAATTTACTTCTCGAAGATTCACACGTCAACCT  
TGACGAAATCAACGCGTGTTTTTCGCGTGATGGAGACAAGCTGACTTTTTCTTTCGCATCTGAGAGCACTTTAA  
ATTATTGTCATAGTTATTCTAATATTTTAAAATACGTGTGCAAACTTACTTCCCGGCATCTAATAGAGAGGTCT  
ACATGAAGGAGTTTTTGGTCACCAGGGTTAACACCTGGTTTTGTAAGTTTTCTAGGATAGACACTTTTTTATTA  
TACAAGGGGGTAGCCCAAAAGGTGTAAATAGTGAGCAATTTTACAGCGCAATGGAAGATGCATGGCACTAC  
AAAAAGACTCTTGCAATGTGTAACAGCGAGAGGATTCTTCTGAAGATTCCTCATCGGTCAATTACTGGTTCCC  
AAAAATGAGAGATATGGTCATAGTTCTCTATTTCGACATATCTCTCGACACCAGTAAAGGACCCGCAAAGAA  
GTCTTAGTGTCAAAGGATTTTGTATTACAGTTTTTAAATCACATTTCGCACTTATCAAGCCAAGGCACTTACATAC  
TCCAATGTTTTATCCTTTGTGCAATCAATTCGTTCAAGGGTAATTATCAACGGAGTGACTGCCAGGTCTGAGTG  
GGATGTTGACAAATCTCTTTGCAATCCTTGTCATGACATTTTTCTTGCACTAAGCTTGCCGTTTTAAAGA  
CGAATTGTTAATCAGCAAGTTTAGTTTGGGGCCAAATCAGTAAGCCAGCATGTATGGGATGAGATTTCCCTG  
GCTTTTGGAACGCATTTCCATCGATCAAGGAGAGACTGCTAAATCGGAACTAATTAAGTGTCGGGAGAC  
GCATTAGAAATCAGGGTGCCTGATTTATATGTGACTTTTACGATAGATTAGTGACTGAGTACAAAACATCGG  
TGGATATGCCAGTGCTTGATATCAGAAAGAGAATGGAGGAGACTGAGGTTATGTACAATGCATTGTCTGAGC  
TATCTGTGCTCAAGGAGTCGGACAAGTTGACGTTGATGTTTTTCCCGATGTGCCAGACTTTGGAGGTTGA  
CCCAATGACTGCAGCAAAGGTTATTGTGGCAGTGATGAGCAACGAGAGCGGACTGACTCTTACATTGCAACA  
GCCAATGAAGCAAATGTCGATTGGCACTTAAAGATTAGAAAAAGCCTCTGAGGGTGCCTAGTGGTTACT  
TCTAGAGATGTTGAAGAACCATCCATGAAGGGTTCAATGGCAAGAGGAGATTACAATTGGCCGGTCTGTCT  
GGAGACCAACCAGAGTCTTCTATACTCGGAACGAGGAAATAGAGTCATTAGAGCAATTCACATGGCAACG  
GCTAGTTGTTAATTCGGAACAGATGAGTTGATTGTACACGGGCCCCATTAAGTTTCAAGCAATGAAAA  
ACTTTATTGATAGCCTGGTAGCATCACTCTCTGCTGCGGTGTGCAACCTAGTCAAGATCCTAAAGGATACAGCT



GCTATAGATCTCGAAACCCGTCAGAAGTTTGGAGTCTTAGATGTTGCAACCAAAAGATGGTTAATTAACCTTT  
AGCCAAGAATCACGCATGGGGCGTTATTGAAACACATGCTAGGAAGTACCACGTTGCACTTTTGGAGTATGAT  
GAGCATGGAGTGGTAACTTGCGACAGTTGGAGAAGGGTGGCCGTGAGTTCTGAGTCAATGGTTTATTCTGAT  
ATGGCAAAGCTCAGAACACTGAGGAGATTATTAAGAGATGGTGAGCCTCATGTCAGCAGTGCTAAAGTCGTC  
CTAGTCGACGGTGTCCCGGGTTGTGGAAAGACAAAAGAGATTCTCTCGAAAGTAAATTTTGAGGAAGATCTA  
ATCTTAGTACCGGGTAAGCAGGCTGCTGAAATGATAAAGAGGCGTGCTAATGCGTCAGGAATAATTCAAGCC  
ACAAGAGATAATGTTCTGACTGTTGATTCATTTATAATGAATTACGGTAAAGGAACACGCTGTCAGTTCAAAA  
GGTTATTTATCGACGAAGGTCTGATGTTGCACACTGGTTGTGTGAATTTCTTGTTTCTATGTCTCTGTGCGAA  
ATTGCATATGTTTATGGAGACACACAACAAATTCATACATCAACAGAGTATCCGGTTTTCCGTACCCTGCACA  
TTTTGCAAAAATAGAGGTTGATGAGGTGGAACTCGCAGAACTACGCTGCGTTGTCCAGCCGACATTACCCAC  
TATCTTAACAGAAGGTACGAAGGATATGTCATGTGTACATCGTCGGTTAAAAAGTCAGTTTCTCAGGAAATGG  
TGAGCGGGGCCGAATGATCAATCCTGTATCTAAGCCATTGAATGGGAAAGTTTTGACTTTCACTCAGTCTGA  
TAAAGAGGCGCTGCTTCTCGAGGATATACGGACGTCCATACAGTACATGAGGTACAAGGTGAGACATATGC  
AGATGTGTCGTTGGTCAGATTGACTCCGACACCTGTATCTATCATCGCAGGAGATAGTCCGCACGTTCTCGTA  
GCTTTGTCAAGGCATACCCAAACATTGAAGTATTACACCGTAGTGATGGATCCTCTTGTAAGTATAATTAGGG  
ATTTAGAAAACTTAGTTCTTACTTGTTAGATATGTATAAAGTAGATGCAGGGACCCAATAGCAATTACAGGT  
AGACTCCGTGTTTAAAGGTTCTAATCTTTTTGTTGCAGCACCAAAGACTGGAGATATCTCAGATATGCAATTTT  
ACTATGATAAGTGTCTCCAGGTAATAGCACCATGTTAATAACTATGATGCTGTTACCATGAGGTTGACTGAC  
ATTTCTCTAATGTCAAAGATTGCATATTGGATTTCTCTAAGTCTGTGGCTGCACCGAAGGATCCGATCAAACC  
ACTGATTCCAATGGTACGAACAGCGGCAGAAATGCCACGCCAGACTGGACTATTGGAAAATTTGGTGCGAT  
GATCAAAAAGAACTTTAATTCACCGGAGTTATCAGGAATAATCGACATTGAAAATACTGCATCTTAGTAGTA  
GATAAATTTTTGATAGTTACTTGCTTAAAGAAAAAGAAAACCAAATAAAAAATGTTTCTTTATTTGTAGAGA  
GTCTCTCAATAGATGGTTAGAGAAGCAGGAGCAAGTGACCATTGGTCAGCTTGACAGTTTTGATTTGTGGAT  
CTTCAGCCGTTGATCAGTACAGGCATATGATTAAGCGCAACCTAAGCAGAAGCTGGATACATCAATTCAAA  
GCGAATATCCGGCCTTGACAGCATTGTGTATCATTCGAAAAAGATCAACGCAATCTTCGGTCTTTGTTCACT  
GAGCTCACAAGGCAAATGCTCGAAAGCATAGACTCAAGTAAGTTTTTGTCTTTACAAGGAAGACGCCAGCTC  
AAATTGAGGATTTCTTCGGAGATCTCGATAGCCATGTCCCTATGGATATCTTGGAGTTGGATATTTGAAAGTAT  
GACAAATCTCAGAACGAGTTCCACTGTGCAGTAGAGTATGAAATATGGAGAAGACTTGGATTAGAAGATTTTC  
TGGGAGAAGTTTGGAAACAAGGCCACAGGAAAACCTACTCTTAAAGATTACACAGCTGGTATTAACCGTGT  
ATGGTACCAGAGAAAGAGTGGGGACGTTACAACATTCATCGGTAATACGGTGATTATTGCTGCTTGTAGCT  
TCCATGTTGCCATGGAGAAAATAATCAAAGGTGCATTTTTCGGAGATGACAGTTTACTATACTTCCCAAAG  
GTTGTGAGTTTCTGACATACAGCATACAGCCAACCTTATGTGGAATTTGAGGCTAAGCTATTCAGAAAGCA  
GTATGGTTATTTCTGTGGAAGGTACGTGATACATCATGACAGAGGGTGTATTGTTTATTATGACCCTTTGAAGT  
TGATTTCTAACTTGGTGCTAAACACATCAAGGATTGGGATCACTTAGAAGAGTTCAGAAGATCCCTTTGTGAT  
GTTGCAAAATCGTTGAACAACTGTGCGTATTACACGCAGTTGGACGACGCTGTGAGTGAGGTCCATAAAACCG  
CACCCCGGGTTCGTTTGTATATAAAAGTTTGTAAATATCTGTCCGATAAGGTTCTTTTGAAGTTTGT  
TAGATGGCTCTTGTTAAGGGTAAAGTCAATATTAATGAGTTCATAGACTTGTCAAAATCAGAAAAATTTCTCC  
GTCTATGTTACACCTGTTAAGAGTGTGATCTCCAAGGTTGATAAGATATTGGTTCATGAAGATGAATCTT  
TGTCCGAAGTCAATTTACTCAAAGGTGTAAACTCATTGATGGTGGCTATGTACACCTTGCTGGTCTGTGGT  
ACAGGTGAATGGAATTTGCCAGATAATTGTCGTGGTGGTGTGAGTGTCTGTTTGGTCGATAAGAGAATGGAG  
AGAGCGGACGAGGCAACTCTGCTTCATACTATACCGCAGCGGCTAAGAAAAGTTTCAGTTCAAAGTCGTT  
CAAATTACAACATCACTACCAAGGACGCAGAAAAGGCAGTTTGGCAAGTACTAGTTAATATTAGAAATGTTAA  
AATTGCTGCGGGTACTGTCCGCTGTCATTAGAAATTTGTGTCAGTGTGTATTGTTTATAAAAATATTATAAAC  
TCGGTTTGAGAGAGAAAATTACGAGCGTCACGGATGGAGGGCCCATGGAAGTATCAGAAGAAGTTGTTGATG  
AGTTCATGGAAGAAGTCCCGATGTCTGTAAGGCTTGCAAAATTCGTTTGAAGACCGGAAAAAGTTTAGTAG  
TAAAAGTGAGAATAATAGTGGTAATAATAGGCCGAAACCAGACAAAAACCAAAGGAAGGGAAAGGGTTTAA  
AAGTTAGGGTTGAGAAGGATAATTTAATTGATAATGAATTGGAGACTTACGTCGCCGATTGAGATTCGTATTA  
AATATGTCTTACACAATCGCAACTCCATCGCAATTTGTGTTTTTGTATCAGCATGGGCCGACCCTATAGAATTA

ATAAATTTATGTACTAATTCAGTGTCCAAACACAACAAGCTAGAACAAACGTTCAACGGCAATT  
TAGCGAAGTGTGGAAACCTGTCCCTCAAGTCACTGTTAGGTTTCTGACAGTGGTTTAAAGGTGTATAGGTAC  
AATGCGGTACTAGATCCTCTAGTTACTGCTTTGTTAGGAGCTTCGATACTAGAAATAGGATTATAGAAGTCGA  
AAATCAGGCGAACCCGACAACCGCCGAAACGTTAGACGCTACTCGTAGAGTAGATGACGCAACGGTGGCTAT  
AAGGAGCGCTATAAATAATTTAGTAGTAGAATTGGTCAAAGGAACAGGTTTGTACAATCAGAGCACATTTGA  
AAGTGCATCCGGTTTACAATGGTCCTCTGCACCTGCATCTTGA

#MZ438228

1

ATGGCATAACACAGACAGCTACCACATCCGCTTTGCTCGACACTGTCCGAGGTAACAATACCTTGGTCAATG  
ATCTTGCGAAGCGGCGTCTTTATGACACAGCGGTGACGAGTTCAACGCTCGTGATCGCAGGCCCAAAGTAA  
ATTTTTCCAAAGTAATAAGTGAGGAACAGACGCTTATTGCTACTAGGGCATATCCAGAATTCCAGATAACCTC  
TATAATACGCAGAACGCCGTGCATTGCTTGGCGGTGGACTACGATCCTTAGAACTGGAATATCTAATGATGC  
AGATCCCGTATGGATCACTCACATATGATATAGGTGGGAATTTTGCATCTCATCTGTTCAAAGGACGGGCATA  
TGTTCACTGCTGTATGCCAATCTTGATGTCCGCGACATAATGCGGCACGAAGGCCAGAAAGACAGTATAGAA  
TTATACCTTTCCAGGCTTGAGCGGGGCAACAAAGTTGTCCCAAATTTCCAAAAGGAAGCTTTTGACAGATACG  
CTGAAACGCCAGACGAAGTTGTCTGTCACAGTACCTTCCAAACGTGTACGCACCAGCAGGTGGAAAACACAG  
GCAGAGTGTATGCTATTGCATTGCACAGTATATACGATATACCTGCTGATGAATTCGGAGCGGCACTTTTAA  
GAAAAATGTCCATGTTTGTACGCCGCCTTCCACTTTTCCGAGAATTTACTTCTCGAAGATTCACACGTCAACCT  
TGACGAAATCAACGCGTGTTTTTCGCGTGATGGAGACAAGCTGACTTTTTCTTTCGCATCTGAGAGCACTTTAA  
ATTATTGTCATAGTTATTCTAATATTTTAAAATACGTGTGCAAACTTACTTCCCGGCATCTAATAGAGAGGTCT  
ACATGAAGGAGTTTTTGGTCACCAGGGTTAACACCTGGTTTTGTAAGTTTTCTAGGATAGATACTTTTTTATTAT  
ACAAGGGGGTAGCCCAAAAGGTGTAAATAGTGAGCAATTTTACAGCGCAATGGAAGATGCATGGCACTACA  
AAAAGACTCTTGCAATGTGTAAACAGCGAGAGGATTCTTCTGAAGATTCCTCATCGGTCAATTACTGGTTCCCA  
AAAATGAGAGATATGGTCATAGTTCTCTATTGACATATCTCTCGACACCAGTAAAAGGACCCGCAAGAAG  
TCTTAGTGTCAAAGGATTTTGTATTACAGTTTTTAAATCACATTCGCACTTATCAAGCCAAGGCATTACATACT  
CCAATGTTTTATCCTTTGTGAATCAATTCGTTCAAGGGTAATTATCAACGGAGTGACTGCCAGGTCTGAGTGG  
GATGTTGACAAATCTTTTTGCAATCCTTGTCATGACATTTTTCTTGCACTAAGCTTGCCGTTTTAAAAGAC  
GAATTGTTAATCAGCAAGTTTAGTTTGGGGCCAAAATCAGTAAGCCAGCATGTATGGGATGAGATTTCCCTGG  
CTTTTGAAACGCATTTCCATCGATCAAGGAGAGACTGCTAAATCGGAACTAATTAAGTGTCGGGAGACGC  
ATTAGAAATCAGGGTGCCTGATTTATATGTGACTTTTACGATAGATTAGTGACTGAGTACAAAACATCGGTG  
GATATGCCAGTGCTTGATATCAGAAAGAGAATGGAGGAGACTGAGGTTATGTACAATGCATTGTCTGAGCTA  
TCTGTGCTCAAGGAGTCGGACAAGTTGACGTTGATGTTTTTCCCGGATGTGCCAGACTTTGGAGGTTGACC  
CAATGACTGCAGCAAAGGTTATTGTGGCAGTGATGAGCAACGAGAGCGGACTGACTCTTACATTGCAACAGC  
CAACTGAAGCAAATGTCGATTGGCACTTAAAGATTGAGAAAAAGCCTCTGAGGGTGCACTAGTGGTTACTTC  
TAGAGATGTTGAAGAACCATCCATGAAGGGTTCAATGGCAAGAGGAGATTACAATTGGCCGGTCTGTCTGG  
AGACCAACCAGAGTCTTCTATACTCGGAACGAGGAAATAGAGTCATTAGAGCAATTCACATGGCAACGGCT  
AGTTCGTTAATTCGAAACAGATGAGTTCGATTGTGTACACGGGCCCATTAAGTTGAGCAATGAAAACT  
TTATTGATAGCCTGGTAGCATCACTCTCTGCTGCGGTGTGCAACCTAGTCAAGATCCTAAAGGATACAGCTGCT  
ATAGATCTCGAAACCCGTCAGAAGTTTGGAGTCTTAGATGTTGCAACCAAAGATGGTTAATTAAACCTTTAG  
CCAAGAATCACGCATGGGGCGTTATTGAAACACATGCTAGGAAGTACCACGTTGCACTTTTGGAGTATGATGA  
GCATGGAGTGGTAACTTGCGACAGTTGGAGAAGGGTGGCCGTGAGTTCTGAGTCAATGGTTTATTCTGATAT  
GGCAAAGCTCAGAACTGAGGAGATTATTAAGAGATGGTGAGCCTCATGTCAGCAGTGCTAAAGTCGTCT  
AGTCGACGGTGTCCCGGGTTGTGGAAAGACAAAAGAGATTCTCTCGAAAGTAAATTTGAGGAAGATCTAAT

CTTAGTACCGGGTAAGCAGGCTGCTGAAATGATAAAGAGGCGTGCTAATGCGTCAGGAATAATTCAAGCCAC  
AAGAGATAATGTTCTGACTGTTGATTCAATTTATAATGAATTACGGTAAAGGAACACGCTGTCAGTTCAAAAGG  
TTATTTATCGACGAAGGTCTGATGTTGCACACTGGTTGTGTGAATTTCTGTTTCTATGTCTCTGTGCGAAATT  
GCATATGTTTATGGAGACACACAACAAATTCATACATCAACAGAGTATCCGGTTTTCCGTACCCTGCACATTT  
TGCAAAAATAGAGGTTGATGAGGTGGAAGTCTGCAGAACTACGCTGCGTTGTCCAGCCGACATTACCCACTAT  
CTTAACAGAAGGTACGAAGGATATGTCATGTGTACATCGTCGGTTAAAAAGTCAGTTTCTCAGGAAATGGTGA  
GCGGGGCCGCAATGATCAATCCTGTATCTAAGCCATTGAATGGGAAAGTTTTGACTTTCACTCAGTCTGATAA  
AGAGGCGCTGCTTCTCGAGGATATACGGACGTCCATACAGTACATGAGGTACAAGGTGAGACATATGCAGA  
TGTGTCGTTGGTCAGATTGACTCCGACACCTGTATCTATCATCGCAGGAGATAGTCCGCACGTTCTCGTAGCTT  
TGTCAAGGCATACCCAAACATTGAAGTATTACACCGTAGTGATGGATCCTCTTGTAAGTATAATTAGGGATTTA  
GAAAACTTAGTTCTTACTTGTTAGATATGTATAAAGTAGATGCAGGGACCCAATAGCAATTACAGGTAGACT  
CCGTGTTTAAAGGTTCTAATCTTTTTGTTGCAGCACCAAAGACTGGAGATATCTCAGATATGCAATTTTACTAT  
GATAAGTGCTCCCAGGTAATAGCACCATGTTAAATACTATGATGCTGTTACCATGAGGTTGACTGACATTTT  
TCTTAATGTCAAAGATTGCATATTGGATTTTTCTAAGTCTGTGGCTGCACCGAAGGATCCGATCAAACCACTGA  
TTCCAATGGTACGAACAGCGGCAGAAATGCCACGCCAGACTGGACTATTGGAAAATTTGGTGGCGATGATCA  
AAAGAACTTTAATTCACCGGAGTTATCAGGAATAATCGACATTGAAAATACTGCATCTTTAGTAGTAGATAA  
ATTTTTGATAGTTACTTGCTTAAAGAAAAAGAAAACCAAATAAAAATGTTTCTTTATTTGTAGAGAGTCTCT  
CAATAGATGGTTAGAGAAGCAGGAGCAAGTGACCATTGGTCAGCTTGCAGATTTTGATTTGTGGATCTTCCA  
GCCGTTGATCAGTACAGGCATATGATTAAGCGCAACCAAAGCAGAAGCTGGATACATCAATTCAAAGCGAA  
TATCCGGCCTTGAGACGATTGTGTATCATTCGAAAAAGATCAACGCAATCTTCGGTCTTTGTTGAGTGAGCT  
CACAAGGCAAATGCTCGAAAGCATAGACTCAAGTAAGTTTTGTTCTTTACAAGGAAGACGCCAGCTCAAATT  
GAGGATTTCTTCGAGATCTCGATAGCCATGTCCCTATGGATATCTTGGAGTTGGATATTTGAAAGTATGACA  
AATCTCAGAACGAGTTCCACTGTGCAGTAGAGTATGAAATATGGAGAAGACTTGGATTAGAAGATTTTCTGG  
GAGAAGTTTGGAACAAGGCCACAGGAAAACACTCTTAAAGATTACACAGCTGGTATTTAAACGTGTTTATG  
GTACCAGAGAAAGAGTGGGGACGTTACAACATTCATCGTAATACGGTGATTATTGCTGCTTGTAGCTTCC  
ATGTTGCCCATGGAGAAAATAATCAAAGGTGCATTTTGCGGAGATGACAGTTTACTATACTTCCAAAAGGTT  
GTGAGTTTCTGACATACAGCATAACGCCAACCTTATGTGGAATTTGAGGCTAAGCTATTCAGAAAGCAGTA  
TGTTATTTCTGTGGAAGGTACGTGATACATCATGACAGAGGGTGTATTGTTTATTATGACCTTTGAAGTTGA  
TTTCTAAACTTGGTGCTAAACACATCAAGGATTGGGATCACTTAGAAGAGTTCAGAAGATCCCTTTGTGATGTT  
GCAAATTCGTTGAACAACTGTGCGTATTACACGCAGTTGGACGACGCTGTGAGTGAGGTCCATAAAACCGCAC  
CCCCGGTTTCGTTTGTATATAAAAGTTTAGTTAAATATCTGTCCGATAAGGTTCTTTTGAAGTTTGTATAG  
ATGGCTCTTGTTAAGGGTAAAGTCAATATTAATGAGTTCATAGACTTGTCAAATCAGAAAAATATCTCCGTC  
TATGTTACACCTGTTAAGAGTGTCATGATCTCCAAGGTTGATAAGATATTGGTTCATGAAGATGAATCTTTGT  
CCGAAGTCAATTTACTCAAAGGTGTAAACTCATTGATGGTGGCTATGTACACCTTGCTGGTCTTGTGGTGACA  
GGTGAATGGAATTTGCCAGATAAATGTCGTGGTGGTGTGAGTGTCTGTTTGGTCGATAAGAGAATGGAGAGA  
GCGGACGAGGCAACTCTTGCTTCACTATACCGCAGCGGCTAAGAAAAGGTTTCAGTTCAAAGTCGTTCCAA  
ATTACAACATCACTACCAAGGACGCAGAAAAGGCAGTTTGGCAAGTACTAGTTAATATTAGAAATGTTAAAT  
TGCTGCGGGTTACTGTCCGCTGTCATTAGAATTTGTGTGAGTGTGATTGTTTATAAAAAATATTATAAACTCG  
GTTTGAGAGAGAAAATTACGAGCGTCACGGATGGAGGGCCCATGGAACATCAGAAGAAGTTGTTGATGAG  
TTCATGGAAGAAGTCCCGATGTCTGTAAGGCTTGCAAAATTTGTTTGAAGACCGGAAAAAGTTTAGTAGTA  
AAAGTGAGAATAATAGTGGAATAATAGGCCGAAACCAGACAAAAACCAAAGGAAGGGAAGGGTTTAAAA  
GTTAGGGTTGAGAAGGATAATTTAATTGATAATGAATTGGAGACTTACGTCGCCGATTGAGATTCGTATTAAA  
TATGTCTTACACAATCGCAACTCCATCGCAATTTGTGTTTTGTGTCATCAGCATGGGCCGACCCTATAGAATTAAT  
AAATTTATGTACTAATTCAGTGGTAATCAGTTCCAAACACAACAAGCTAGAACAACCGTTCAACGGCAATTTA  
GCGAAGTGTTGGAACCTGTCCCTCAAGTCACTGTTAGGTTTCTGACAGTGGTTTTAAGGTGTATAGGTACAA  
TGCGGTACTAGATCCTCTAGTTACTGCTTTGTTAGGAGCTTTGATACTAGAAATAGGATTATAGAAGTCGAAA  
ATCAGGCGAACCCGACAACCGCCGAAACGTTAGACGCTACTCGTAGAGTAGATGACGCAACGGTGGCTATAA

GGAGCGCTATAAATAATTTAGTAGTAGAATTGGTCAAAGGAACAGGTTTGTACAATCAGAGCACATTTGAAA  
GTGCATCCGGTTTACAATGGTCCTCTGCACCTGCATCTTGA

#MZ945420

1

ATGGCATACACACAGACAGCTACCACATCCGCTTTGCTCGACACTGTCCGAGGTAACAATACCTTGGTCAACG  
ATCTTGCGAAGCGGCGTCTTTATGACACAGCGGTGCGACGAGTTCAACGCTCGTGATCGCAGGCCCAAAGTAA  
ATTTTTCCAAAGTAATAAGTGAGGAACAGACGCTTATTGCTACTAGGGCATATCCTGAATTCCAGATAACCTTC  
TATAATACGCAGAACGCCGTGCATTGCTTGGTGGACTACGATCCTTAGAACTGGAATATCTAATGATGC  
AGATCCCGTACGGATCACTCACATATGATATAGGTGGGAATTTGCATCTCATCTGTTCAAAGGACGGGCATA  
TGTTCACTGCTGTATGCCCAATCTTGATGTCCGCGACATAATGCGGCACGAAGGCCAGAAAGACAGTATAGAA  
TTATACCTTTCCAGGCTTGAGCGGGGCAACAAAGTTGTCCCAAATTTCCAAAAGGAAGCTTTTGACAGATACG  
CTGAAACGCCAGACGAAGTTGTCTGTACAGTACCTTCCAAACGTGTACGCACCAGCAGGTGGAAAACACAG  
GCAGGGTGTATGCTATTGCATTGCACAGTATATACGATATACCTGCTGATGAATTCGGAGCGGCACTTTTAAG  
GAAAAATGTCCATGTTTGTACGCCGCTTCCACTTTTCCGAGAATTTACTTCTCGAAGATTCACACGTCAACCT  
TGACGAAATCAACGCGTGTTTTTCGCGTGATGGAGACAAGCTGACTTTTTCTTTCGCATCTGAGAGCACTTTAA  
ATTATTGTCATAGTTATTCTAATATTTTAAAATACGTGTGCAAACTTACTTCCCGGCATCTAATAGAGAGGTCT  
ACATGAAGGAGTTTTTGGTCACCAGGGTTAACACCTGGTTTTGTAAGTTTTCTAGGATAGATACTTTTTTATTAT  
ACAAGGGGGTAGCCCAAAAGGTGTAAATAGTGAGCAATTTTACAGCGCAATGGAAGATGCATGGCACTACA  
AAAAGACTCTTGCAATGTGTAAACAGCGAGAGGATTCTTCTGAAGATTCCTCATCGGTCAATTACTGGTTCCCA  
AAAATGAGAGATATGGTCATAGTTCTCTATTGACATATCTCTCGACACTAGTAAAAGGACCCGCAAAGAAG  
TCTTAGTGTCAAAGGATTTTGTATTACAGTTTTAAATCACATTCGCACTTATCAAGCCAAGGCACTTACATACT  
CCAATGTTTTATCCTTTGTGAATCAATTCGTTCAAGGGTAATTATCAACGGAGTGACTGCCAGGTCTGAGTGG  
GATGTTGACAAATCTTTTTGCAATCCTTGTCATGACATTTTTCTTGCATACTAAGCTTGCCGTTTTAAAAGAC  
GAATTGTTAATCAGCAAGTTTAGTTTGGGGCCAAAATCAGTAAGCCAGCATGTATGGGATGAGATTTCCCTGG  
CTTTTGAAACGCATTTCCATCGATCAAGGAGAGACTGCTAAATCGGAACTAATTAAGTGTCGGGAGACGC  
ATTAGAAATCAGGGTGCCTGATTTATATGTGACTTTTCACGATAGATTAGTGACTGAGTACAAAACATCGGTG  
GATATGCCAGTGCTTGATATCAGAAAGAGAATGGAGGAGACTGAGGTTATGTACAATGCATTGTCTGAGCTA  
TCTGTGCTCAAGGAGTCGGACAAGTTCGACGTTGATGTTTTTTCCCGGATGTGCCAGACTTTGGAGGTAGACC  
CAATGACTGCAGCAAAGGTTATTGTGGCAGTGATGAGCAACGAGAGCGGACTGACTCTTACATTGCAACAGC  
CAACTGAAGCAAATGTGCGATTGGCACTTAAAGATTGAGAAAAAGCCTCTGAGGGTGCCTAGTGGTTACTTC  
TAGAGATGTTGAAGAACCATCCATGAAGGGTTCAATGGCAAGAGGAGAGTTACAATTGGCCGGTCTGTCTGG  
AGACCAACCAGAGTCTTCTATACTCGGAACGAGGAAATAGAGTCGTTAGAGCAATTCACATGGCAACGGC  
TGGTTCGTTAATTCGGAAACAGATGAGTTCGATTGTGTACACGGGCCCCATTAAAGTTCAGCAAATGAAAAAC  
TTTATTGATAGCCTGGTAGCATCACTCTCTGCTGCGGTGTGCAACCTAGTCAAGATCCTAAAGGATACAGCTGC  
TATAGATCTCGAAACCCGTCAGAAGTTTGGAGTCTTAGATGTTGCGACCAAAGATGGTTAATTAACCTTTA  
GCCAAGAATCACGCATGGGGCGTTATTGAAACACATGCTAGGAAGTACCACGTTGCACTTTTGGAGTATGATG  
AGCATGGAGTGGTAACCTGCGACAGTTGGAGAAGGGTGGCCGTGAGTTCTGAGTCAATGGTTTATTCTGATA  
TGGCAAAGCTCAGAACACTGAGGAGATTATTAAGAGATGGTGAGCCTCATGTCAGCAGTGCTAAAGTCGTCC  
TAGTTGACGGTGTCCCGGGTTGTGGAAGACAAAAGAGATTCTCTCGAAAGTAAATTTTGGAGGAAGATCTAA  
TCTTAGTACCGGGTAAGCAGGCTGCTGAAATGATAAAGAGGCGTGCTAATGCGTCAGGAATAATTCAAGCCA  
CAAGAGATAATGTTGCTACTGTTGATTCAATTTATAATGAATTACGGTAAAGGAACACGCTGTCAGTTCAAAG  
GTTATTTATCGACGAAGGTCTGATGTTGCACACTGGTTGTGTGAATTTTCTGTTTCTATGTCTCTGTGCGAAAT  
TGCATATGTTTATGGAGACACACAACAAATTCCATACATCAACAGAGTATCCGGTTTTCCGTACCCTGCACATT

TTGCAAAAATAGAGGTTGATGAGGTGGAACTCGCAGAACTACGCTGCGTTGTCCAGCCGACATTACCCACTA  
TCTTAACAGAAGGTACGAAGGACATGTCATGTGTACATCGTCGGTTAAAAAGTCAGTTTCTCAGGAAATGGTG  
AGCGGGGCCGCAATGATCAATCCTGTATCTAAGCCATTGAATGGGAAAGTTTTGACTTTCTACTCAGTCTGATA  
AAGAGGCGCTGCTTCTCGAGGATATACGGACGTCCATACAGTACATGAGGTACAAGGTGAGACATATGCAG  
ATGTGTCGTTGGTCAGATTGACTCCGACACCTATATCTATCATCGCAGGAGATAGTCCGCACGTTCTCGTAGCT  
TTGTCAAGGCATACCCAAACATTGAAGTATTACACCGTAGTGATGGATCCTCTTGTAAGTATAATTAGGGATT  
AGAAAACTTAGTTCTTACTTGTTAGATATGTATAAAGTAGATGCAGGGACCCAATAGCAATTACAGGTAGAC  
TCCGTGTTTAAAGGTTCTAATCTTTTTGTTGCAGCACCAAGACTGGAGATATCTCAGATATGCAATTTTACTAT  
GATAAGTGCTCCCAGGTAATAGCACCATGTTAAATAACTATGATGCTGTTACCATGAGGTTGACTGACATTC  
TCTTAATGTCAAAGATTGCATATTGGATTTCTCTAAGTCTGTGGCTGCACCGAAGGATCCGATCAAACCACTGA  
TTCCAATGGTACGAACGGCGGCAGAAATGCCACGCCAGACTGGACTATTGGAAAATTTGGTGGCGATGATCA  
AAAGAACTTTAATTCACCGGAGTTATCAGGAATAATCGACATTGAGAATACTGCATCTTTAGTAGTAGATAA  
ATTTTTGATAGTTACTTGCTTAAAGAAAAAGAAAAACCAATAAAAAATGTTTCTTTATTTGTAGAGAGTCTCT  
CAATAGATGGTTAGAGAAGCAGGAGCAAGTGACCATTGGTCAGCTTGCAGATTTTGATTTGTGGATCTTCT  
GCCGTTGATCAGTACAGGCATATGATTAAAGCGCAACCTAAGCAGAAGCTGGATACATCAATTCAAAGCGAAT  
ATCCGGCCTTGACAGCATTGTGTATCATTGAAAAAGATCAACGCAATCTTCGGTCCTTTGTTCAAGTACGCTC  
ACAAGGCAAATGCTCGAAAGCATAGACTCAAGTAAGTTTTTGTCTTTACAAGGAAGACGCCAGCTCAAATTG  
AGGATTTCTTCGGAGATCTCGATAGCCATGTCCCTATGGATATCTTGAGTTGGATATTTGAAGTATGACAAA  
TCTCAGAACGAGTTCCACTGTGCAGTAGAGTATGAAATATGGAGAAGACTTGGATTAGAAGATTTTCTGGGA  
GAAGTTTGAAACAAGGCCACAGGAAAACTACTCTTAAAGATTACACAGCTGGTATTAAACGTGTTTATGGT  
ACCAGAGAAAGAGTGGGGACGTTACAACATTCATCGGTAATACGGTGATTATTGCTGCTTGTAGCTTCCAT  
GTTGCCCATGGAGAAAATAATCAAAGGTGCATTTTTCGGAGATGACAGTTTACTATACTTCCCAAAGGTTGT  
GAGTTTCTGACATACAGCATACAGCCAACCTTATGTGGAATTTTCGAGGCTAAGCTATTCAGAAAGCAGTATG  
GTTATTTCTGTGGAAGGTACGTGATACATCATGACAGAGGGTGTATTGTTTATTATGACCTTTGAAGTTGATT  
TCTAACTTGGTGCTAAACACATCAAGGATTGGGATCACTTAGAAGAGTTCAGAAGATCCCTTTGTGATGTTG  
CAAATTCGTTGAACAACCTGTGCGTATTACACGCAGTTGGACGACGCTGTGAGTGAGGTCCATAAAACCGCAC  
CCCGGGTTCGTTTGTATATAAAAGTTTAGTTAAATATCTGTCCGATAAGGTTCTTTTAGAAGTTTGTATAGA  
TGGCTCTTGTTAAGGGTAAAGTCAATATTAATGAGTTCATAGACTTGTCAAATCAGAAAAATTTCTCCGTCT  
ATGTTACACCTGTTAAGAGTGTGATCTCCAAGGTTGATAAGATATTGGTTCATGAAGATGAATCTTTGTC  
CGAAGTCAATTTACTCAAAGGTGTAAGTCAATGATGGTGGCTATGTACATCTTGCTGGTCTTGTTGTTGACA  
GGTGAATGGAATTTGCCAGATAATTGTCGTGGTGGTGTGAGTGTCTGTTTGGTCGATAAAAGAATGGAGAGA  
GCGGACGAGGCAACTCTTGCTTCATACTATACCGCAGCGGCTAAGAAAAGGTTTCAGTTCAAAGTCGTTCCAA  
ATTACAACATCACTACCAAGGACGCAAAAAAGGCAGTTTGGCAAGTACTAGTTAATATTAGAAATGTTAAAT  
TGCTGCGGGTTACTGTCCGCTGTCATTAGAATTTGTGTGAGTGTGATTGTTTATAAAAAATATTATAAACTCG  
GTTTGAGAGAGAAAATTACGAGCGTAACGGATGGAGGGCCCATGGAAGTATCAGAAGAAGTTGTTGATGAG  
TTCATGGAAGAAGTCCCGATGTCTGTAAGGCTTGCAAAATTTGTTTGAAGACCGGGAAAAAGTTTAGTAGTA  
AAAGTGAGAATAATAGTGGTAATAATAGGCCGAAACCAACAAAAACCAAGGAAGGAAAAGGGTTTAAAA  
GTTAGGGTTGAGAAGGATAATTTAATTGATAATGAATTGGAGACTTACGTCGCCGATTGAGTTGATTTAAA  
TATGTCTTACACAATCGCAACTCCATCGCAATTTGTGTTTTTGTCTCAGCATGGGCCGACCCTATAGAATTAAT  
AAATTTATGTACTAATCACTAGGTAATCAATTCAAACACAACAAGCTAGAACAACCGTTCAACGGCAATTTA  
GCGAAGTGTGGAAACCTGTCCCTCAAGTCACTGTTAGGTTTCTGACAGTGGTTTTAAGGTGTATAGGTACAA  
TGCGGTACTAGATCCTCTAGTTACTGCTTTGTTAGGAGCTTTCGATACTAGAAATAGGATTATAGAAGTCGAAA  
ATCAGGCGAACCCGACAACCGCCGAAACGTTAGACGCTACTCGTAGAGTAGATGACGCAACGGTGGCTATAA  
GGAGCGCTATAAATAATTTAGTAGTAGAATTGGTCAAAGGAACAGGTTTGACAATCAGAGCACATTTGAAA  
GTGCATCCGGTTTACAATGGTCCTCTGCACCAGCATCTTGA

#NC 028478

ATGGCATAACACACAGACAGCTACCACATCCGCTTTGCTCGACACTGTCCGAGGTAACAATACCTTGGTCAACG  
ATCTTGCGAAGCGGCGTCTTTATGACACAGCGGTGACGAGTTCAACGCTCGTGATCGCAGGCCCAAAGTAA  
ATTTTTCCAAAGTAATAAGTGAGGAACAGACGCTTATTGCTACTAGGGCATATCCAGAATTCAGATAACCTTC  
TATAATACGCAGAACGCCGTGCATTGCTTGGCGGTGGACTACGATCCTTAGAACTGGAATATCTAATGATGC  
AGATCCCGTACGGATCACTCACATATGATATAGGTGGGAATTTTGCATCTCATCTGTTCAAAGGACGGGCATA  
TGTTCACTGCTGTATGCCAATCTTGATGTCCGCGACATAATGCGGCACGAAGGCCAGAAAGACAGTATAGAA  
TTATACCTTTCCAGGCTTGAGCGGGGCAACAAAGTTGTCCAAATTTCCAAAGGAAGCTTTTGACAGATACG  
CTGAAACGCCAGACGAAGTTGTCTGTACAGTACCTTCCAAACGTGTACGCACCAGCAGGTGGAAAACACAG  
GCAGGGTGTATGCTATTGCATTGCACAGTATATACGATATACCTGCTGATGAATTCGGAGCGGCACTTTTAAG  
GAAAAATGTCCATGTTTGTACGCCGCTTCCACTTTTCCGAGAATTTACTTCTCGAAGATTCACACGTCAACCT  
TGACGAAATCAACGCGTGTTTTTGCCTGATGGAGACAAGCTGACTTTTTCTTTCGCATCTGAGAGCACTTTAA  
ATTATTGTCATAGTTATTCTAATATTTAAAATACGTGTGCAAACTTACTTCCCGGCATCTAATAGAGAGGTCT  
ACATGAAGGAGTTTTTGGTCACCAGGGTTAACACCTGGTTTTGTAAGTTTTCTAGGATAGATACTTTTTTATTAT  
ACAAGGGGGTAGCCCAAAAGGTGTAAATAGTGAGCAATTTTACAGCGCAATGGAAGATGCATGGCACTACA  
AAAAGACTCTTGCAATGTGTAACAGCGAGAGGATTCTTCTGAAGATTCCTCATCGGTCAATTACTGGTCCCA  
AAAATGAGAGATATGGTCATAGTTCTCTATTGACATATCTCTCGACACCAGTAAAAGGACCCGCAAAGAAG  
TCTTAGTGCAAAGGATTTTGTATTACAGTTTTAAATCACATTCGCACTTATCAAGCCAAGGCATTACATACT  
CCAATGTTTTATCCTTTGTGAATCAATTCGTTCAAGGGTAATTATCAACGGAGTGACTGCCAGGTCTGAGTGG  
GATGTTGACAAATCTTTTTGCAATCCTTGTCATGACATTTTTCTTGCATACTAAGCTTGCCGTTTTAAAAGAC  
GAATTGTTAATCAGCAAGTTTAGTTTGGGGCCAAAATCAGTAAGCCAGCATGTATGGGATGAGATTTCCCTGG  
CTTTTGAAACGCATTTCCATCGATCAAGGAGAGACTGCTAAATCGGAACTAATTAAGTGTCGGGAGACGC  
ATTAGAAATCAGGGTGCCTGATTTATATGTGACTTTTACGATAGATTAGTGACTGAGTACAAAACATCGGTG  
GATATGCCAGTGCTTGATATCAGAAAGAGAATGGAGGAGACTGAGGTTATGTACAATGCATTGTCTGAGCTA  
TCTGTGCTCAAGGAGTCGGACAAGTTGACGTTGATGTTTTTCCCGGATGTGCCAGACTTTGGAGGTAGACC  
CAATGACTGCAGCAAAGGTTATTGTGGCAGTGATGAGCAACGAGAGCGGACTGACTCTTACATTGCAACAGC  
CAACTGAAGCAAATGTCGATTGGCACTTAAAGATTGAGAAAAAGCCTCTGAGGGTGCCTAGTGTTACTTC  
TAGAGATGTTGAAGAACCATCCATGAAGGGTTCAATGGCAAGAGGAGATTACAATTGGCCGGTCTGTCTGG  
AGACCAACCAGAGTCTTCTATACTCGGAACGAGGAAATAGAGTCATTAGAGCAATTCCACATGGCAACGGCT  
AGTTCGTTAATTCGGAACAGATGAGTTCGATTGTGTACACGGGCCCATTAAGTTGAGCAAATGAAAACT  
TTATTGATAGCCTGGTAGCATCACTCTCTGCTGCGGTGTGCAACCTAGTCAAGATCCTAAAGGATACAGCTGCT  
ATAGATCTCGAAACCCGTCAGAAGTTTGGAGTCTTAGATGTTGCGACCAAAGATGGTTAATTAACCTTTAG  
CCAAGAATCACGCATGGGGCGTTATTGAAACACATGCTAGGAAGTACCAGTTGCACTTTTGGAGTATGATGA  
GCATGGAGTGGTAACTTGCGACAGTTGGAGAAGGGTGGCCGTGAGTTCTGAGTCAATGGTTTATTCTGATAT  
GGCAAAGCTCAGAACTGAGGAGATTATTAAGAGATGGTGAGCCTCATGTCAGCAGTGCTAAAGTCGTCT  
AGTTGACGGTGTCCCGGGTTGTGGAAAGACAAAAGAGATTCTCTCGAAAGTAAATTTGAGGAAGATCTAAT  
CTTAGTACCGGGTAAGCAGGCTGCTGAAATGATAAAGAGGCGTGCTAATGCGTCAGGAATAATTCAAGCCAC  
AAGAGATAATGTTCTGACTGTTGATTCAATTTATAATGAATTACGGTAAAGGAACACGCTGTCAGTTCAAAGG  
TTATTTATCGACGAAGGTCTGATGTTGCACACTGGTTGTGTGAATTTCTTGTCTATGTCTCTGTGCGAAATT  
GCATATGTTTATGGAGACACACAACAAATTCATACATCAACAGAGTATCCGGTTTTCCGTACCCTGCACATTT  
TGCAAAAATAGAGGTTGATGAGGTGGAACTCGCAGAACTACGCTGCGTTGTCCAGCCGACATTACCACTAT  
CTTAACAGAAGGTACGAAGGATATGTCATGTGTACATCGTCGGTTAAAAAGTCAGTTTCTCAGGAATGGTGA  
GCGGGGCCGCAATGATCAATCCTGTATCTAAGCCATTGAATGGGAAGTTTTGACTTTCAGTCTGATAA  
AGAGGCGCTGCTTCTCGAGGATATACGGACGTCCATACAGTACATGAGGTACAAGGTGAGACATATGCAGA  
TGTGTGCTTGGTCAGATTGACTCCGACACCTGTATCTATCATCGCAGGAGATAGTCCGCACGTTCTCGTAGCTT  
TGTCAAGGCATACCCAAACATTGAAGTATTACACCGTAGTGATGGATCCTCTTGAAGTATAATTAGGGATTTA

GAAAACTTAGTTCCTTACTTGTTAGATATGTATAAAGTAGATGCAGGGACCCAATAGCAATTACAGGTAGACT  
CCGTGTTTAAAGGTTCTAATCTTTTTGTTGCAGCACCAAGACTGGAGATATCTCAGATATGCAATTTTACTAT  
GATAAGTGTCTCCCAGGTAATAGCACCATGTTAAATACTATGATGCTGTTACCATGAGGTTGACTGACATTC  
TCTTAATGTCAAAGATTGCATATTGGATTTCTCTAAGTCTGTGGCTGCACCGAAGGATCCGATCAAACCACTGA  
TTCCGATGGTACGAACGGCGGCAGAAATGCCACGCCAGACTGGACTATTGGAAAATTTGGTGGCGATGATCA  
AAAGAACTTTAATTCACCGGAGTTATCAGGAATAATCGACATTGAGAATACTGCATCTTAGTAGTAGATAA  
ATTTTTGATAGTTACTTGCTTAAAGAAAAAGAAAACCAAATAAAAATGTTTCTTTATTTGTAGAGAGTCTCT  
CAATAGATGGTTAGAGAAGCAGGAGCAAGTGACCATTGGTCAGCTTGCAGATTTTGATTTGTGGATCTTCTCT  
GCCGTTGATCAGTACAGGCATATGATTAAAGCGCAACCTAAGCAGAAGCTGGATACATCAATTCAAAGCGAAT  
ATCCGGCCTTGCAGACGATTGTGTATCATTGAAAAAGATCAACGCAATCTTCGGTCTTTGTTTCAGTGAGCTC  
ACAAGGCAAATGCTCGAAAGCATAGACTCAAGTAAGTTTTGTTCTTTACAAGGAAGACGCCAGCTCAAATTG  
AGGATTTCTTCGGAGATCTCGATAGCCATGTCCCTATGGATATCTTGAGTTGGATATTTCGAAGTATGACAAA  
TCTCAGAACGAGTTCCACTGTGCAGTAGAGTATGAAATATGGAGAAGACTTGGATTAGAAGATTTTCTGGGA  
GAAGTTTGAAACAAGGCCACAGGAAAACCTACTCTTAAAGATTACACAGCTGGTATTAACCGTGTTTATGGT  
ACCAGAGAAAAGAGTGGGGACGTTACAACATTCATCGGTAATACGGTGATTATTGCTGCTTGTTAGCTTCCAT  
GTTGCCCATGGAGAAAATAATCAAAGGTGCATTTTGCAGGAGATGACAGTTTACTATACTTCCAAAAGGTTGT  
GAGTTTCTTGACATACAGCATACAGCCAACCTTATGTGGAATTTGAGGCTAAGCTATTCAGAAAGCAGTATG  
GTTATTTCTGTGGAAGGTACGTGATACATCATGACAGAGGGTGTATTGTTTATTATGACCTTTGAAGTTGATT  
TCTAAACTTGGTGCTAAACACATCAAGGATTGGGATCACTTAGAAGAGTTCAGAAGATCCCTTTGTGATGTTG  
CAAATTCGTTGAACAACTGTGCGTATTACACGCAGTTGGACGACGCTGTGAGTGAGGTCCATAAAACCGCACC  
CCCGGGTTCGTTTGATATAAAAGTTAGTTAAATATCTGTCCGATAAGGTTCTTTTAGAAGTTTGTATAGA  
TGGCTCTTGTTAAGGGTAAAGTCAATATTAATGAGTTCATAGACTTGTCAAAATCAGAAAAATTTCTTCCGTCT  
ATGTTACACCTGTTAAGAGTGTGATGATCTCCAAGGTTGATAAGATATTGGTTCATGAAGATGAATCTTTGTC  
CGAAGTCAATTTACTCAAAGGTGTAAACTCATTGATGGTGGCTATGTACATCTTGCTGGTCTTGTTGGTGACA  
GGTGAATGGAATTTGCCAGATAATTGTCGTGGTGGTGTGAGTGTCTGTTTGGTCGATAAGAGAATGGAGAGA  
GCGGACGAGGCAACTCTTGCTTCACTATACCGCAGCGGCTAAGAAAAGGTTTCAGTTCAAAGTCGTTCCAA  
ATTACAACATCACTACCAAGGACGCAGAAAAGGCAGTTTGGCAAGTACTAGTTAATATTAGAAATGTTAAAT  
TGCTGCGGGTACTGTCCGCTGTCATTAGAATTTGTGTGAGTGTGATTGTTTATAAAAATATTATAAACTCG  
GTTTGAGAGAGAAAATTACGAGCGTCACGGATGGAGGGCCCATGGAAGTATCAGAAGAAGTTGTTGATGAG  
TTCATGGAAGAAGTCCCGATGTCTGTAAGGCTTGCAAAATTTGTTTGAAGACCGGAAAAAAGTTTAGTAGTA  
AAAGTGAGAATAATAGTGGTAATAATAGGCCGAAACCAGACAAAAACCAAAGGAAGGAAAAGGGTTTAAAA  
GTTAGGGTTGAGAAGGATAATTTAATTGATAATGAATTGGAGACTTACGTCGCCGATTCAGATTCGTATTA  
TATGTCTTACACAATCGCAACTCCATCGCAATTTGTGTTTTGTGTCATCAGCATGGGCCGACCCTATAGAATTA  
AAATTTATGTACTAATTCCTAGGTAATCAGTTCCAAACACAACAAGCTAGAACAACCGTTCAACGCAATTTA  
GCGAAGTGTGGAACCTGTCCCTCAAGTCACTGTTAGGTTTCTGACAGTGGTTTAAAGGTGTATAGGTACAA  
TGCGGTACTAGATCCTCTAGTTACTGCTTTGTTAGGAGCTTCGATACTAGAAATAGGATTATAGAAGTCGAAA  
ATCAGGCGAACCCGACAACCGCCGAAACGTTAGACGCTACTCGTAGAGTAGATGACGCAACGGTGGCTATAA  
GGAGCGCTATAAATAATTTAGTAGTAGAATTGGTCAAAGGAACAGGTTTGTACAATCAGAGCACATTTGAAA  
GTGCATCCGGTTACAATGGTCCTCTGCACCTGCATCTTGA

#OK339579

ATGGCATACACACAGACAGCTACCACATCCGCTTTGCTCGACACTGTCCGAGGTAACAATACCTTGGTCAACG  
ATCTTGCGAAGCGGCGTCTTTATGACACAGCGGTGACGAGTTCAACGCTCGTGATCGCAGGCCCAAAGTAA

ATTTTCCAAAGTAATAAGTGAGGAACAGACGCTTATTGCTACTAGGGCATATCCAGAATTCCAGATAACCTTC  
TATAATACGCAGAACGCCGTGCATTGCTTGGCGGTGGACTACGATCCTTAGAACTGGAATATCTAATGATGC  
AGATCCCGTACGGATCACTCACATATGATATAGGTGGGAATTTGCATCTCATCTGTTCAAAGGACGGGCATA  
TGTTCACTGCTGTATGCCAATCTTGATGTCCGCGACATAATGCGGCACGAAGGCCAGAAAGACAGTATAGAA  
TTATACCTTTCCAGGCTTGAGCGGGGCAACAAAGTTGTCCCAAATTTCCAAAAGGAAGCTTTTGACAGATACG  
CTGAAACGCCAGACGAAGTTGTCTGTACAGTACCTTCCAAACGTGTACGCACCAGCAGGTGGAAAACACAG  
GCAGGGTGTATGCTATTGCATTGCACAGTATATACGATATACCTGCTGATGAATTCGGAGCGGCACTTTTAAG  
GAAAAATGTCCATGTTTGTACGCCGCTTCCACTTTTCCGAGAATTTACTTCTCGAAGATTCACACGTCAACCT  
TGACGAAATCAACGCGTGTTTTTCGCGTGATGGAGACAAGCTGACTTTTTCTTTCGCATCTGAGAGCACTTTAA  
ATTATTGTCATAGTTATTCTAATATTTTAAAATACGTGTGCAAACTTACTTCCCGGCATCTAATAGAGAGGTCT  
ACATGAAGGAGTTTTTGGTCACCAGGGTTAACACCTGGTTTTGTAAAGTTTTCTAGGATAGATACTTTTTATTAT  
ACAAGGGGGTAGCCCAAAAGGTGTAAATAGTGAGCAATTTTACAGCGCAATGGAAGATGCATGGCACTACA  
AAAAGACTCTTGCAATGTGTAAACAGCGAGAGGATTCTTCTGAAGATTCCTCATCGGTCAATTACTGGTTCCTCA  
AAAATGAGAGATATGGTCATAGTTCTCTATTGACATATCTCTCGACACCAGTAAAAGGACCCGCAAAGAAG  
TCTTAGTGTCAAAGGATTTTGTATTACAGTTTTAAATCACATTCGCACTTATCAAGCCAAGGCACTTACATACT  
CCAATGTTTTATCCTTTGTGCAATCAATTCGTTCAAGGGTAATTATCAACGGAGTGACTGCCAGGTCTGAGTGG  
GATGTTGACAAATCTTTTTGCAATCCTTGTCATGACATTTTTCTGCATACTAAGCTTGCCGTTTTAAAAGAC  
GAATTGTTAATCAGCAAGTTTAGTTAGGGCCAAAATCAGTAAGCCAGCATGTATGGGATGAGATTTCCCTGG  
CTTTGGAAACGCATTTCCATCGATCAAGGAGAGACTGCTAAATCGGAACTAATTAAGTGTCGGGAGACGC  
ATTAGAAATCAGGGTGCCTGATTTATATGTGACTTTTACGATAGATTAGTGACTGAGTACAAAACATCGGTG  
GATATGCCAGTGCTTGATATCAGAAAGAGAATGGAGGAGACTGAGGTTATGTACAATGCATTGTCTGAGCTA  
TCTGTGCTCAAGGAGTCGGACAAGTTCGACGTTGATGTTTTTCCCGGATGTGCCAGACTTTGGAGGTAGACC  
CAATGACTGCAGCAAAGGTTATTGTGGCAGTGATGAGCAACGAGAGCGGACTGACTCTTACATTCGAACAGC  
CAACTGAAGCAAATGTGCGATTGGCACTTAAAGATTGAGAAAAAGCCTCTGAGGGTGCCTAGTGTTACTTC  
TAGAGATGTTGAAGAACCATCCATGAAGGGTCAATGGCAAGAGGAGATTACAATTGGCCGGTCTGTCTGG  
AGACCAACCAGAGTCTTCTATACTCGGAACGAGGAAATAGAGTCATTAGAGCAATTCACATGGCAACGGCT  
AGTTCGTTAATTCGGAAACAGATGAGTTCGATTGTGTACACGGGCCCCATTAAAGTTCAGCAAATGAAAACT  
TTATTGATAGCCTGGTAGCATCACTCTCTGCTGCGGTGTCGAACCTAGTCAAGATCCTAAAGGATACAGCTGCT  
ATAGATCTCGAAACCCGTCAGAAGTTTGGAGTCTTAGATGTTGCGACCAAAGATGGTTAATTAACCTTTAG  
CCAAGAATCACGCATGGGGCGTTATTGAAACACATGCTAGGAAGTACCACGTTGCACTTTGGAGTATGATGA  
GCATGGAGTGGTAACTTGCGACAGTTGGAGAAGGGTGGCCGTGAGTCTGAGTCAATGGTTTATTCTGATAT  
GGCAAAGCTCAGAACTGAGGAGATTATTAAGGGATGGTGAGCCTCATGTCAGCAGTGCTAAAGTCGTCTT  
AGTTGACGGTGTCCGGGTTGTGGAAAAGACAAAAGAGATTCTCTCGAAAGTAAATTTGAGGAAGATCTAAT  
CTTAGTACCGGTAAAGCAGGCTGCTGAAATGATAAAGAGGCGTGCTAATGCGTCAGGAATAATTCAAGCCAC  
AAGAGATAATGTTCTGACTGTTGATTCAATTATAATGAATTACGGTAAAGGAACACGCTGTCAGTTCAAAGG  
TTATTTATCGACGAAGGTCTGATGTTGCACACTGGTTGTGTGAATTTCTTGTTTCTATGTCTCTGTGCGAAATT  
GCATATGTTTATGGAGACACACAACAAATTCCATACATCAACAGAGTATCCGGTTTTCCGTACCCTGCACATTT  
TGCAAAAATAGAGGTTGATGAGGTGGAACTCGCAGAACTACGCTGCGTTGTCCAGCCGACATTACCCACTAT  
CTTAACAGAAGGTACGAAGGACATGTCATGTGTACATCGTCGGTTAAAAGTCAGTTTCTCAGGAAATGGTGA  
GCGGGGCCGCAATGATCAATCCTGTATCTAAGCCACTGAATGGGAAAGTTTGACTTTCACTCAGTCTGATAA  
AGAGGCGCTGCTTCTCGAGGATATACGGACGTCCATACAGTACATGAGGTACAAGGTGAGACATATGCAGA  
TGTGTCGTTGGTCAGATTGACTCCGACACCTGTATCTATCATCGCAGGAGATAGTCCGCACGTTCTCGTAGCTT  
TGTCAGGCATACCCAAACATTGAAGTATTACACCGTAGTGATGGATCCTCTTGTAAGTATAATTAGGGATTAA  
GAAAACTTAGTTCTTACTTGTTAGATATGTATAAAGTAGATGCAGGAACCCAATAGCAATTACAGGTAGACT  
CCGTGTTTAAAGGTTCTAATCTTTTTGTTGCAGCACCAAGACTGGAGATATCTCAGATATGCAATTTTACTAT  
GATAAGTGTCTCCAGGTAATAGCACCATGTTAAATAACTATGATGCTGTTACCATGAGGTTGACTGACATTTT  
TCTTAATGTCAAAGATTGCATATTGGATTTCTCTAAGTCTGTGGCTGCACCGAAGGATCCGATCAAACCACTGA  
TTCCAATGGTACGAACGGCGGCAGAAATGCCACGCCAGACTGGACTATTGGAAAATTTGGTGGCGATGATCA



AAAGAACTTTAATTCACCGGAGTTATCAGGAATAATCGACATTGAGAATACTGCATCTTTAGTAGTAGATAA  
ATTTTTTGATAGTTACTTGCTTAAAGAAAAAGAAAACCAAATAAAAATGTTTCTTTATTTGTAGAGAGTCTCT  
CAATAGATGGTTAGAGAAGCAGGAGCAAGTGACCATTGGTCAGCTTGCAGATTTTGATTTGTGGATCTTCCT  
GCCGTTGATCAGTACAGGCATATGATTAAAGCGCAACCTAAGCAGAAGCTGGATACATCAATTCAAAGCGAAT  
ATCCGGCCTTGCAGACGATTGTGTATCATTGAAAAAGATCAACGCAATCTTCGGTCCTTTGTTTCAGTGAGCTC  
ACAAGGCAAATGCTCGAAAGCATAGACTCAAGTAAGTTTTTGTCTTTACAAGGAAGACGCCAGCTCAAATTG  
AGGATTTCTTCGGAGATCTCGATAGCCATGTCCCTATGGATATCTTGGAGTTGGATATTTGGAAGTATGACAAA  
TCTCAGAACGAGTTCCACTGTGCAGTAGAGTATGAAATATGGAGAAGACTTGGATTAGAAGATTTTCTGGGA  
GAAGTTTGGAACAAGGCCACAGGAAAACCTACTCTTAAAGATTACACAGCTGGTATAAAAACGTGTTTGTGGT  
ACCAGAGAAAAGAGTGGGGACGTTACAACATTCATCGGTAATACGGTGATTATTGCTGCTTGTGTTAGCTTCCAT  
GTTGCCCATGGAGAAAATAATCAAAGGTGCATTTTGGGAGATGACAGTTTACTATACTTCCAAAAGGTTGT  
GAGTTTCTGACATACAGCATAACAGCCAACCTTATGTGGAATTTTCGAGGCTAAGCTATTCAGAAAGCAGTATG  
GTTATTTCTGTGGAAGGTACGTGATACATCATGACAGAGGGTGTATTGTTTATTATGACCTTTGAAGTTGATT  
TCTAACTTGGTGCTAAACACATCAAGGATTGGGATCACTTAGAAGAGTTCAGAAGATCCCTTTGTGATGTTG  
CAAATTCGTTGAACAACTGTGCGTATTACATGCAGTTGGACGACGCTGTGAGTGAGGTCCATAAAACCGCACC  
CCCGGGTTCGTTTGTGTATAAAAGTTTAGTTAAATATCTGTCCGATAAGGTTCTTTTTAGAAGTTTGTGTTATAGA  
TGGCTCTTGTTAAGGGTAAAGTCAATATTAATGAGTTCATAGACTTGTCAAATCAGAAAAATTTCTTCCGTCT  
ATGTTACACCTGTTAAGAGTGTGATGATCTCAAGGTTGATAAGATATTGGTTCATGAAGATGAATCTTTGTC  
CGAAGTCAATTTACTCAAAGGTGTAAACTCATTGATGGTGGCTATGTACATCTTGCTGGTCTTGTGGTGACA  
GGTGAATGGAATTTGCCAGATAATTGTCGTGGTGGTGTGAGTGTCTGTTTGGTCGATAAGAGAATGGAGAGA  
GCGGACGAGGCAACTCTTGCTTCACTATACCGCAGCGGCTAAGAAAAGGTTTCAGTTCAAAGTCGTTCCAA  
ATTACAACATCACTACCAAGGACGCAGAAAAGGCAGTTTGGCAAGTACTAGTTAATATTAGAAATGTTAAAT  
TGCTGCGGGTACTGTCCGCTGTCATTAGAATTTGTGTGAGTGTGATTGTTTATAAAAATATTATAAACTCG  
GTTTGAGAGAGAAAATTACGAGCGTCACGGATGGAGGGCCCATGGAAGTATCAGAAGAAGTTGTTGATGAG  
TTCATGGAAGAAGTCCCGATGTCTGTAAGGCTTGCAAAATTTGTTTGAAGACCGGAAAAAAGTTTAGTAGTA  
AAAGTGAGAATAATAGTGGTAATAATAGGCCGAAACCAAACAAAAACCAAAGGAAGGAAAAGGGTTAAAA  
GTTAGGGTTGAGAAGGATAATTTAATTGATAATGAATTGGAGACTTACATCGCCGATTCAGATTCGTATTAAA  
TATGTCTTACACAATCGCAACTCCATCGCAATTTGTGTTTTTGTATCAGCATGGGCCGACCCTATAGAATTAAT  
AAATTTATGTACTAATTCCTAGGAAATCAGTTCCAAACACAACAAGCTAGAACAACCGTTCAACGGCAATTTA  
GCGAAGTGTGGAACCTGTCCCTCAAGTCACTGTTAGGTTTCTGACAGTGGTTTTAAGGTGTATAGGTACAA  
TGCGGTACTAGATCCTCTAGTTACTGCTTTGTTAGGAGCTTTCGATACTAGAAATAGGATTATAGAAGTCGAAA  
ATCAGGCGAACCCGACAACCGCCGAAACGTTAGACGCTACTCGTAGAGTAGATGACGCAACGGTGGCTATAA  
GGAGCGCTATAAATAATTTAGTAGTAGAATTGGTCAAAGGAACAGGTTTGTACAATCAGAGCACATTTGAAA  
GTGCATCCGGTTTACAATGGTCCTCTGCACCTGCATCTTGA

#OK624678

1

ATGGCATACACACAGACAGCTACCACATCCGCTTTGCTCGACACTGTCCGAGGTAACAATACCTTGGTCAACG  
ATCTTGCGAAGCGGCGTCTTTATGACACAGCGGTCGACGAGTTCAACGCTCGTGATCGCAGGCCCAAAGTAA  
ATTTTCCAAAGTAATAAGTGAGGAACAGACGCTTATTGCTACTAGGGCATATCCAGAATTCAGATAACCTTC  
TATAATACGCAGAACGCCGTGCATTCGCTTGCCGGTGGACTACGATCCTTAGAACTGGAATATCTAATGATGC  
AGATCCCGTACGGATCACTCACATATGATATAGGTGGGAATTTGCATCTCATCTGTTCAAAGGACGGGCATA  
TGTTCACTGCTGTATGCCAATCTTGATGTCCGCGACATAATGCGGCACGAAGGCCAGAAAGACAGTATAGAA  
TTATACCTTTCCAGGCTTGAGCGGGGCAACAAAGTTGTCCCAAATTTCCAAAAGGAAGCTTTTACAGATACG

CTGAAACGCCAGACGAAGTTGTCTGTACAGTACCTTCCAAACGTGTACGCACCAGCAGGTGAAAAACACAG  
GCAGGGTGTATGCTATTGCATTGCACAGTATATACGATATACCTGCTGATGAATTCGGAGCGGCACTTTTAAG  
GAAAAATGTCCATGTTTGTACGCCCTTCCACTTTTCCGAGAATTTACTTCTCGAAGATTCACACGTCAACCT  
TGACGAAATCAACGCGTGTTTTTCGCGTGATGGAGACAAGCTGACTTTTTCTTTCGCATCTGAGAGCACTTTAA  
ATTATTGTCATAGTTATTCTAATATTTTAAAATACGTGTGCAAACTTACTTCCCGGCATCTAATAGAGAGGTCT  
ACATGAAGGAGTTTTTGGTCACCAGGGTTAACACCTGGTTTTGTAAGTTTTCTAGGATAGATACTTTTTTATTAT  
ACAAGGGGGTAGCCCAAAAGGTGTAAATAGTGAGCAATTTTACAACGCAATGGAAGATGCATGGCACTACA  
AAAAGACTCTTGCAATGTGTAACAGCGAGAGGATTCTTCTGAAGATTCCTCATCGGTCAATTACTGGTCCCCA  
AAAATGAGAGATATGGTCATAGTTCTCTATTTCGACATATCTCTCGACACCAGTAAAAGGACCCGCAAAGAAG  
TCTTAGTGTCAAAGGATTTTGTATTACAGTTTTAAATCACATTCGCACTTATCAAGCCAAGGCACTTACATACT  
CCAATGTTTTATCCTTTGTGCAATCAATTCGTTCAAGGGTAATTATCAACGGAGTGACTGCCAGGTCTGAGTGG  
GATGTTGACAAATCTTTTTGCAATCCTTGTCATGACATTTTTCTGCATACTAAGCTTGCCGTTTTAAAAGAC  
GAATTGTTAATCAGCAAGTTTAGTTTGGGGCCAAAATCAGTAAGCCAGCATGTATGGGATGAGATTTCCCTGG  
CTTTTGAAACGCATTTCCATCGATCAAGGAGAGACTGCTAAATCGGAACTAATTAAGTGTCGGGAGACGC  
ATTAGAAATCAGGGTGCCTGATTTATATGTGACTTTCCACGATAGATTAGTGACTGAGTACAAAACATCGGTG  
GATATGCCAGTGCTTGATATCAGAAAGAGAATGGAGGAGACTGAGGTTATGTACAATGCATTGTCTGAGCTA  
TCTGTGCTCAAGGAGTCGGACAAGTTCGACGTTGATGTTTTTTCCCGGATGTGCCAGACTTTGGAGGTAGACC  
CAATGACTGCAGCAAAGTTATTGTGGCAGTGATGAGCAACGAGAGCGGACTGACTCTTACATTCGAACAGC  
CAACTGAAGCAAATGTGCGATTGGCACTTAAAGATTGAGAAAAAGCCTCTGAGGGTGCCTAGTGGTTACTTC  
TAGAGATGTTGAAGAACCATCCATGAAGGGTCAATGGCAAGAGGAGAGTTACAATTGGCCGGTCTGTCTGG  
AGACCAACCAGAGTCTTCTATACTCGGAACGAGGAAATAGAGTCATTAGAGCAATTCCACATGGCAACGGCT  
AGTTGTTAATTCGGAAACAGATGAGTTCGATTGTGTACACGGGCCCCATTAAAGTTCAGCAAATGAAAACT  
TTATTGATAGCCTGGTAGCATCACTCTCTGCTGCGGTGTCGAACCTAGTCAAGATCCTAAAGGATACAGCTGCT  
ATAGACCTCGAAACCCGTCAGAAGTTTGGAGTCTTAGATGTTGCGACCAAAGATGGTTAATTAACCTTTAG  
CCAAGAATCACGCATGGGGCGTTATTGAAACACATGCTAGGAAGTACCACGTTGCACTTTTGGAGTATGATGA  
GCATGGAGTGGTAAGTTCGACAGTTGGAGAAGGGTGGCCGTGAGTTCTGAGTCAGTGGTTTATTCTGATAT  
GGCAAAGCTCAGAACTGAGGAGATTATTAAGAGATGGTGAGCCTCATGTCAGCAGTGCTAAAGTCGTCTCT  
AGTTGACGGTGTCCCGGGTGTGGAAAAGACAAAAGAGATTCTCTCGAAAGTAAATTTTGGAGGAAGATCTAAT  
CTTAGTACCGGTAAAGCAGGCTGCTGAAATGATAAAGAGGCGTGCTAATGCGTCAGGAATAATTCAAGCCAC  
AAGAGATAATGTTCTGACTGTTGATTCAATTATAATGAATTACGGTAAAGGAACACGCTGTCAGTTCAAAAGG  
TTATTTATCGACGAAGGTCTGATGTTGCACACTGGTTGTGTGAATTTCTTGTCTATGTCTCTGTGCGAAATT  
GCATATGTTTATGGAGACACACAACAAATTCCATACATCAACAGAGTATCCGGTTTTCCGTACCCTGCACATTT  
TGCAAAAATAGAGGTTGATGAGGTGGAACTCGCAGAACTACGCTGCGTTGTCCAGCCGACATTACCCACTAT  
CTTAACAGAAGGTACGAAGGACATGTCATGTGTACATCGTCGGTTAAAAAGTCAGTTTCTCAGGAAATGGTGA  
GCGGGGCCGCAATGATCAATCCTGTATCTAAGCCACTGAATGGGAAAGTTTTGACTTTCACTCAGTCTGATAA  
AGAGGCGCTGCTTCTCGAGGATATACGGACGTCCATACAGTACATGAGGTACAAGGTGAGACATATGCAGA  
TGTGTCGTTGGTCAGATTGACTCCGACACCTGTATCTATCATCGCAGGAGATAGTCCACACGTTCTCGTAGCTT  
TGTCAAGGCATACCCAAACATTGAAGTATTACACCGTAGTGATGGATCCTCTTGTAAGTATAATTAGGGATTTA  
GAAAACTTAGTTCTTACTTGTTAGATATGTATAAAGTAGATGCAGGGACCCAATAGCAATTACAGGTAGACT  
CCGTGTTTAAAGGTTCTAATCTTTTTGTTGCAGCACCAAGACTGGAGATATCTCAGATATGCAATTTTACTAT  
GATAAGTGTCTCCAGGTAATAGCACCATGTTAAATAACTATGATGCTGTTACCATGAGGTTGACTGACATTTT  
TCTTAATGTCAAAGATTGCATATTGGATTTCTCTAAGTCTGTGGCTGCACCGAAGGATCCGATCAAACCACTGA  
TTCCAATGGTACGAACGGCGGCAGAAATGCCACGCCAGACTGGACTATTGGAAAATTTGGTGGCGATGATCA  
AAAGAACTTTAATTCACCGGAGTTATCAGGAATAATCGACATTGAGAATACTGCATCTTTAGTAGTAGATAA  
ATTTTTGATAGTTACTTGCTTAAAGAAAAAGAAAACCAAATAAAAATGTTTCTTTATTTGTAGAGAGTCTCT  
CAATAGATGGTTAGAGAAGCAGGAGCAAGTGACCATTGGTCAGCTTGCAAGTTTTGATTTTGTGGATCTTCCT  
GCCGTTGATCAGTACAGGCATATGATTAAGCGCAACCTAAGCAGAAGCTGGATACATCAATTCAAAGCGAAT  
ATCCGGCCTTGACAGACGATTGTGTATCATTGAAAAAGATCAACGCAATCTTCGGTCCTTTGTTCAAGTGAGCTC

ACAAGGCAAATGCTCGAAAGCATAGACTCAAGTAAGTTTTTGTCTTTACAAGGAAGACGCCAGCTCAAATTG  
AGGATTTCTTCGGAGATCTCGATAGCCATGTCCCTATGGATATCTTGAGTTGGATATTTGGAAGTATGACAAA  
TCTCAGAACGAGTTCCACTGTGCAGTAGAGTATGAAATATGGAGAAGACTTGGATTAGAAGATTTTCTGGGA  
GAAGTTTGAAAACAAGGCCACAGGAAAACCTACTCTTAAAGATTACACAGCTGGTATTAACCGTGTATGCT  
ACCAGAGAAAAGAGTGGGGACGTTACAACATTCATCGGTAATACGGTGATTATTGCTGCTTGTATAGCTTCCAT  
GTTGCCCATGGAGAAAATAATCAAAGGTGCATTTTTCGGGAGATGACAGTTTACTATACTTCCAAAAGGTTGT  
GAGTTTCTGACATACAGCATACAGCCAACCTTATGTGGAATTTTCGAGGCTAAGCTATTCAGAAAGCAGTATG  
GTTATTTCTGTGGAAGGTACGTGATACATCATGACAGAGGGTGTATTGTTTATTATGACCTTTGAAGTTGATT  
TCTAAACTTGGTGCTAAACACATCAAGGATTGGGATCACTTAGAAGAGTTCAGAAGATCCCTTTGTGATGTTG  
CAAATTCGTTGAACAACTGTGCGTATTACACGCAGTTGGACGACGCTGTGAGTGAGGTCCATAAAACCGCACC  
CCCGGGTTCGTTTGTGTATAAAAGTTTAGTTAAATATCTGTCCGATAAGGTTCTTTTAGAAGTTTGTATAGA  
TGGCTCTTGTAAAGGGTAAAGTCAATATTAATGAGTTCATAGACTTGTCAAATCAGAAAAATTTCTCCGTCT  
ATGTTACACCTGTTAAGAGTGTCTGATCTCCAAGGTTGATAAGATATTGGTTCATGAAGATGAATCTTTGTC  
CGAAGTCAATTTACTCAAAGGTGTAAACTCATTGATGGTGGCTATGTACATCTTGCTGGTCTTGTGGTGACA  
GGTGAATGGAATTTGCCAGATAATTGTCGTGGTGGTGTGAGTGTCTGTTTGGTCGATAAGAGAATGGAGAGA  
GCGGACGAGGCAACTCTTGCTTCACTATACCGCAGCGGCTAAGAAAAGGTTTCAGTTCAAAGTCGTTCCAA  
ATTACAACATCACTACCAAGGACGCAGAAAAGGCAGTTTGGCAAGTACTAGTTAATATTAGAAATGTTAAAT  
TGCTGCGGGTACTGTCCGCTGTCATTAGAATTTGTGTGAGTGTGATTGTTTATAAAAATATTATAAACTCG  
GTTTGAGAGAGAAAATTACGAGCGTCACGGATGGAGGGCCCATGGAAGTATCAGAAGAAGTTGTTGATGAG  
TTCATGGAAGAAGTCCCGATGTCTGTAAGGCTTGCAAAATTTGTTTCGAAGACCGGAAAAAGTTTAGTAGTA  
AAAGTGAGAATAATAGTGGTAATAATAGGCCGAAACCAACAAAAACCAAGGAAGGAAAAGGGTTAAAA  
GTTAGGGTTGAGAAGGATAATTTAATTGATAATGAATTGGAGACTTACATCGCCGATTGAGATTCGTATTAA  
TATGTCTTACACAATCGCAACTCCATCGCAATTTGTGTTTTTGTATCAGCATGGGCCGACCCTATAGAATTA  
AAATTTATGTACTAATTCAGTGAATCAGTTCCAAACACAACAAGCTAGAACAACCGTTCAACGGCAATTTA  
GCGAAGTGTGGAACCTGTCCCTCAAGTCACTGTTAGGTTTCTGACAGTGGTTTAAAGGTGTATAGGTACAA  
TGCGGTACTAGATCCTCTAGTTACTGCTTTGTAGGAGCTTCGATACTAGAAATAGGATTATAGAAGTCGAAA  
ATCAGGCGAACCCGACAACCGCCGAAACGTTAGACGCTACTCGTAGAGTAGATGACGCAACGGTGGCTATAA  
GGAGCGCTATAAATAATTTAGTAGTAGAATTGGTCAAAGGAACAGGTTTGTACAATCAGAGCACATTTGAAA  
GTGCATCCGGTTTACAATGGTCCTCTGCACCTGCATCTTGA

#OM515232

1

ATGGCATACACACAGACAGCTACCACATCCGCTTTGCTCGACACTGTCCGAGGTAACAATACCTTGGTCAATG  
ATCTTGCGAAGCGGCGTCTTTATGACACAGCGGTGACGAGTTCAACGCTCGTGATCGCAGGCCAAAAGTAA  
ATTTTCCAAAGTAATAAGTGAGGAACAGACGCTTATTGCTACTAGGGCATATCCAGAATTCAGATAACCTTC  
TATAATACGCAGAACGCCGTGCATTGCTTCCCGGTGGACTACGATCCTTAGAACTGGAATATCTAATGATGC  
AGATCCCGTACGGATCACTCACATATGATATAGGTGGGAATTTGCATCTCATCTGTTCAAAGGACGGGCATA  
TGTTCACTGCTGTATGCCAATCTTGATGTCCGCGACATAATGCGGCACGAAGGCCAGAAAGACAGTATAGAA  
TTATACCTTTCCAGGCTTGAGCGGGGCAACAAAGTTGTCCCAAATTTCCAAAAGGAAGCTTTTGACAGATACG  
CTGAAACGCCAGACGAAGTTGTCTGTACAGTACCTTCCAAACGTGTACGCACCAGCAGGTGGAAAACACAG  
GCAGGGTGTATGCTATTGCATTGCACAGTATATACGATATACCTGCTGATGAATTCGGAGCGGCACTTTTAAG  
GAAAAATGTCCATGTTTGTACGCCGCTTCCACTTTTCCGAGAATTTACTTCTCGAAGATTCACACGTCAACCT  
TGACGAAATCAACGCGTGTTCGCGTGATGGAGACAAGCTGACTTTTCTTTCGCATCTGAGAGCACTTTAA  
ATTATTGTCATAGTTATTCTAATATTTTAAAAATACGTGTGCAAACTTACTTCCCGGCATCTAATAGAGAGGTCT

ACATGAAGGAGTTTTTGGTCACCAGGGTTAACACCTGGTTTTGTAAGTTTTCTAGGATAGATACTTTTTTATTAT  
ACAAGGGGGTAGCCCAAAAGGTGTAAATAGTGAGCAATTTTACAGCGCAATGGAAGATGCATGGCACTACA  
AAAAGACTCTTGCAATGTGTAAACAGCGAGAGGATTCTTCTGAAGATTCTCATCGGTCAATTACTGGTTCCCA  
AAAATGAGAGATATGGTCATAGTTCTCTATTTCGACATATCTCTCGACACCAGTAAAAGGACCCGCAAAGAAG  
TCTTAGTGTCAAAGGATTTTGTATTACAGTTTTTAAATCACATTGCACTTATCAAGCCAAGGCACTTACATACT  
CCAATGTTTTATCCTTTGTGCAATCAATTCGTTCAAGGGTAATTATCAACGGAGTGACTGCCAGGTCTGAGTGG  
GATGTTGACAAATCTCTTTTGAATCCTTGTCATGACATTTTTCTGCATACTAAGCTTGCCGTTTTAAAAGAC  
GAATTGTTAATCAGCAAGTTTGTGTTGGGGCCAAAATCAGTAAGCCAGCATGTATGGGATGAGATTTCCCTGG  
CTTTTGAAACGCATTTCCATCGATCAAGGAGAGACTGCTAAATCGGAACTAATTAAGTGTCGGGAGACGC  
ATTAGAAATCAGGGTGCCTGATTTATATGTGACTTTTCACGATAGATTAGTGACTGAGTACAAAACATCGGTG  
GATATGCCAGTGCTTGATATCAGAAAGAGAATGGAGGAGACTGAGGTTATGTACAATGCATTGTCTGAGCTA  
TCTGTGCTCAAGGAGTCGGACAAGTTCGACGTTGATGTTTTTTCCCGGATGTGCCAGACTTTGGAGGTAGACC  
CAATGACTGCAGCAAAGGTTATTGTGGCAGTGATGAGCAACGAGAGCGGACTGACTCTTACATTGGAACAGC  
CAACTGAAGCAAATGTGCGATTGGCACTTAAAGATTGAGAAAAAGCCTCTGAGGGTGCCTAGTGGTTACTTC  
TAGAGATGTTGAAGAACCATCCATGAAGGGTCAATGGCAAGAGGAGAGTTACAATTGGCCGGTCTGTCTGG  
AGACCAACCAGAGTCTTCTATACTCGGAACGAGGAAATAGAGTCATTAGAGCAATTCCACATGGCAACGGCT  
AGTTGTTAATTCGGAAACAGATGAGTTCGATTGTGTACACGGGCCCCATTAAAGTTCAGCAAATGAAAACT  
TTATTGATAGCCTGGTAGCATCACTCTCTGCTGCGGTGTCGAACCTAGTCAAGATCCTAAAGGATACAGCTGCT  
ATAGACCTCGAAACCCGTCAGAAGTTTGGAGTCTTAGATGTTGCGACCAAAGATGGTTAATTAACCTTTAG  
CCAAGAATCACGCATGGGGCGTTATTGAAACACATGCTAGGAAGTACCACGTTGCACTTTTGGAGTATGATGA  
GCATGGAGTGGTAACTTGCGACAGTTGGAGAAGGGTGGCCGTGAGTTCTGAGTCAGTGGTTTATTCTGATAT  
GGCAAAGCTCAGAACACTGAGGAGATTATTAAGAGATGGTGAGCCTCATGTCAGCAGTGCTAAAGTCGTCTT  
AGTTGACGGTGTCCCGGTTGTGGAAAAGACAAAAGAGATTCTCTCGAAAGTAAATTTTGGAGGAAGATCTAAT  
CTTAGTACCGGTAAGCAGGCTGCTGAAATGATAAAGAGGCGTGCTAATGCGTCAGGAATAATTCAAGCCAC  
AAGAGATAATGTTCTGACTGTTGATTCAATTATAATGAATTACGGTAAAGGAACACGCTGTCAGTTCAAAAGG  
TTATTTATCGACGAAGGTCTGATGTTGCACACTGGTTGTGTGAATTTTCTGTTTCTATGTCTCTGTGCGAAATT  
GCATATGTTTATGGAGACACACAACAAATTCCATACATCAACAGAGTATCCGGTTTTCCGTACCCTGCACATTT  
TGCAAAAATAGAGGTTGATGAGGTGGAACTCGCAGAACTACGCTGCGTTGTCCAGCCGACATTACCCACTAT  
CTTAACAGAAGGTACGAAGGACATGTCATGTGTACATCGTCGGTTAAAAAGTCAGTTTCTCAGGAAATGGTGA  
GCGGGGCCGCAATGATCAATCCTGTATCTAAGCCACTGAATGGGAAAGTTTTGACTTTCACTCAGTCTGATAA  
AGAGGCGCTGCTTCTCGAGGATATACGGACGTCCATACAGTACATGAGGTACAAGGTGAGACATATGCAGA  
TGTGTCGTTGGTCAGATTGACTCCGACACCTGTATCTATCATCGCAGGAGATAGTCCGCACGTTCTCGTAGCTT  
TGTCAAAGGCATACCCAAACATTGAAGTATTACACCGTAGTGATGGATCCTCTTGTAAGTATAATTAGGGATTGA  
GAAAACTTAGTTCTTACTTGTTAGATATGTATAAAGTAGATGCAGGGACCCAATAGCAATTACAGGTAGACT  
CCGTGTTTAAAGGTTCTAATCTTTTTGTTGCAGCACCAAGACTGGAGATATCTCAGATATGCAATTTTACTAT  
GATAAGTGTCTCCAGGTAATAGCACCATGTTAAATAACTATGATGCTGTTACCATGAGGTTGACTGACATTTT  
TCTTAATGTCAAAGATTGCATATTGGATTTCTCTAAGTCTGTGGCTGCACCGAAGGATCCGATCAAACCACTGA  
TTCCAATGGTACGAACGGCGGCAGAAATGCCACGCCAGACTGGACTATTGGAAAATTTGGTGGCGATGATCA  
AAAGAACTTTAATTCACCGGAGTTATCAGGAATAATCGACATTGAGAATACTGCATCTTTAGTAGTAGATAA  
ATTTTTGATAGTTACTTGCTTAAAGAAAAAGAAAAACCAAATAAAAATGTTTCTTTATTTTGTAGAGAGTCTCT  
CAATAGATGGTTAGAGAAGCAGGAGCAAGTGACCATTGGTCAGCTTGCGAGTTTTGATTTTGTGGATCTTCTT  
GCCGTTGATCAGTACAGGCATATGATTAAGCGCAACCTAAGCAGAAGCTGGATACATCAATTCAAAGCGAAT  
ATCCGGCCTTGACAGACGATTGTGTATCATTCGAAAAAGATCAACGCAATCTTCGGTCTTTGTTTCACTGAGCTC  
ACAAGGCAAATGCTCGAAAGCATAGACTCAAGTAAGTTTTTGTCTTTACAAGGAAGACGCCAGCTCAAATTG  
AGGATTTCTTCGGAGATCTCGATAGCCATGTCCCTATGGATATCTTGAGTTGGATATTTGGAAGTATGACAAA  
TCTCAGAACGAGTTCCACTGTGCAGTAGAGTATGAAATATGGAGAAGACTTGGATTAGAAGATTTTCTGGGA  
GAAGTTTGGAACAAGGCCACAGGAAAACACTCTTAAAGATTACACAGCTGGTATTAAACGTGTTTATGGT  
ACCAGAGAAAGAGTGGGGACGTTACAACATTCATCGGTAATACGGTGATTATTGCTGCTTGTTTAGCTTCCAT

GTTGCCCATGGAGAAAATAATCAAAGGTGCATTTTGC GGAGATGACAGTTTACTATACTTCCAAAAGGTTGT  
GAGTTTCTGACATACAGCATACAGCCAACCTTATGTGGAATTTGAGGGCTAAGCTATTCAGAAAGCAGTATG  
GTTATTTCTGTGGAAGGTACGTGATACATCATGACAGAGGGTGTATTGTTTATTATGACCCTTTGAAGTTGATT  
TCTAAACTTGGTGCTAAACACATCAAGGATTGGGATCACTTAGAAGAGTTCAGAAGATCCCTTTGTGATGTTG  
CAAATTCGTTGAACAACTGTGCGTATTACACGCAGTTGGACGACGCTGTGAGTGAGGTCCATAAAACCGCACC  
CCCGGGTTCGTTTGTGTATAAAAGTTTAGTTAAATATCTGTCCGATAAGGTTCTTTTAGAAGTTTGTATAGA  
TGGCTCTTGTTAAGGGTAAAGTCAATATTAATGAGTTCATAGACTTGTCAAATCAGAAAAATTTCTTCCGTCT  
ATGTTACACCTGTTAAGAGTGTGATGATCTCCAAGGTTGATAAGATATTGGTTCATGAAGATGAATCTTTGTC  
CGAAGTCAATTTACTCAAAGGTGTAAACTCATTGATGGTGGCTATGTACATCTTGCTGGTCTTGTTGGTGACA  
GGTGAATGGAATTTGCCAGATAATTGTCGTGGTGGTGTGAGTGTCTGTTTGGTCGATAAGAGAATGGAGAGA  
GCGGACGAGGCAACTCTTGCTTCATACTATACCGCAGCGGCTAAGAAAAGGTTTCAGTTCAAAGTCGTTCCAA  
ATTACAACATCACTACCAAGGACGCAGAAAAGGCAGTTTGGCAAGTACTAGTTAATATTAGAAATGTTAAAT  
TGCTGCGGGTACTGTCCGCTGTCATTAGAATTTGTGTGAGTGTGTATTGTTTATAAAAATATTATAAACTCG  
GTTTGAGAGAGAAAATTACGAGCGTCACGGATGGAGGGCCCATGGAATATCAGAAGAAGTTGTTGATGAG  
TTCATGGAAGAAGTCCCGATGTCTGTAAGGCTTGCAAAATTTGTTTGAAGACCGGAAAAAAGTTTAGTAGTA  
AAAGTGAGAATAATAGTGGTAATAATAGGCCGAAACCAACAAAAACCAAGGAAGGAAAAGGGTTTAAAA  
GTTAGGGTTGAGAAGGATAATTTAATTGATAATGAATTGGAGACTTACATCGCCGATTGAGATTGATTTAA  
TATGTCTTACACAATCGCAACTCCATCGCAATTTGTGTTTTTGTGATCAGCATGGGCCGACCCTATAGAATTAAT  
AAATTTATGTACTAATTCAGTGTCCAAACACAACAAGCTAGAACAACCGTTCAACGGCAATTTA  
GCGAAGTGTGGAACCTGTCCCTCAAGTCACTGTTAGGTTTCTGACAGTGGTTTAAAGGTGTATAGGTACAA  
TGCGGTACTAGATCCTCTAGTTACTGCTTTGTTAGGAGCTTCGATACTAGAAATAGGATTATAGAAGTCGAAA  
ATCAGGCGAACCCGACAACCGCCGAAACGTTAGACGCTACTCGTAGAGTAGATGACGCAACGGTGGCTATAA  
GGAGCGCTATAAATAATTTAGTAGTAGAATTGGTCAAAGGAACAGGTTTGTACAATCAGAGCACATTTGAAA  
GTGCATCCGGTTTACAATGGTCCTCTGCACCTGCATCTTGA

#OM515233

1

ATGGCATACACACAGACAGCTACCACATCCGCTTTGCTCGACACTGTCCGAGGTAACAATACCTTGGTCAATG  
ATCTTGCGAAGCGGCGTCTTTATGACACAGCGGTGACGAGTTCAACGCTCGTGATCGCAGGCCCAAAGTAA  
ATTTTCCAAAGTAATAAGTGAGGAACAGACGCTTATTGCTACTAGGGCATATCCAGAATTCAGATAACCTTC  
TATAATACGCAGAACGCCGTGCATTGCTTGGCGGTGGACTACGATCCTTAGAACTGGAATATCTAATGATGC  
AGATCCCGTACGGATCACTCACATATGATATAGGTGGGAATTTGCATCTCATCTGTTCAAAGGACGGGCATA  
TGTTCACTGCTGTATGCCAATCTTGATGTCCGCGACATAATGCGGCACGAAGGCCAGAAAGACAGTATAGAA  
TTATACCTTTCCAGGCTTGAGCGGGGCAACAAAGTTGTCCCAAATTTCCAAAAGGAAGCTTTTGACAGATACG  
CTGAAACGCCAGATGAAGTTGTCTGTACAGTACCTTCCAAACGTGTACGCACCAGCAGGTGGAAAACACAG  
GCAGGGTGTATGCTATTGCATTGCACAGTATATACGATATACCTGCTGATGAATTCGGAGCGGCACTTTTAA  
GAAAAATGTCCATGTTTGTACGCCGCTTCCACTTTTCCGAGAATTTACTTCTCGAAGATTCACACGTCAACCT  
TGACGAAATCAACGCGTGTTCGCGTGATGGAGACAAGCTGACTTTTCTTTCGCATCTGAGAGCACTTTAA  
ATTATTGTCATAGTTATTCTAATATTTTAAAAACGTGTGCAAACTTACTTCCCGGCATCTAATAGAGAGGTCT  
ACATGAAGGAGTTTTTAGTCACCAGGGTTAACACCTGGTTTTGTAAGTTTTCTAGGATAGATACTTTTTATTAT  
ACAAGGGGGTAGCCCAAAAGGTGTAAATAGTGAGCAATTTTACAGCGCAATGGAAGATGCATGGCACTACA  
AAAAGACTCTTGCAATGTGTAACAGCGAGAGGATTCTTCTGAAGATTCCTCATCGGTCAATTACTGGTCCCA  
AAAATGAGAGATATGGTCATAGTTCTCTATTGACATATCTCTCGACACCAGTAAAAGGACCCGCAAGAAG  
TCTTAGTGTCAAAGGATTTTGTATTACAGTTTTAAATCACATTCGCACTTATCAAGCCAAGGCACTTACATACT

CCAATGTTTTATCCTTTGTCGAATCAATTCGTTCAAGGGTAATTATCAACGGAGTGACTGCCAGGTCTGAGTGG  
GATGTTGACAAATCTCTTTTGAATCCTTGTCATGACATTTTTCTGCATACTAAGCTTGCCGTTTTAAAGAC  
GAATTGTTAATCAGCAAGTTTAGTTTGGGGCCAAAATCAGTAAGCCAGCATGTATGGGATGAGATTTCCCTGG  
CTTTTGAAACGCATTTCCATCGATCAAGGAGAGACTGCTAAATCGGAACTAATTAAGTGTCTGGGAGACGC  
ATTAGAAATCAGGGTGCCTGATTTATATGTGACTTTTCACGATAGATTAGTGACTGAGTACAAAACATCGGTG  
GATATGCCAGTGCTTGATATCAGAAAGAGAATGGAGGAGACTGAGGTTATGTACAATGCATTGTCTGAGCTA  
TCTGTGCTCAAGGAGTCGGACAAGTTCGACGTTGATGTTTTTTCCCGGATGTGCCAGACTTTGGAGGTAGACC  
CAATGACTGCAGCAAAGGTTATAGTGGCAGTGATGAGCAACGAGAGCGGACTGACTCTTACATTGCAACAGC  
CAACTGAAGCAAATGTGCGATTGGCACTTAAGATTAGAAAAAGCCTCTGAGGGTGCCTAGTGGTTACTTC  
TAGAGATGTTGAAGAACCATCCATGAAGGGTCAATGGCAAGAGGAGAGTTACAATTGGCCGGTCTGTCTGG  
AGACCAACCAGAGTCTTCTATACTCGGAACGAGGAAATAGAGTCATTAGAGCAATTCCACATGGCAATGGCT  
AGTTCGTTAATTCGGAAACAGATGAGTTCGATTGTGTACACGGGCCCATTAAGTTCAGCAAATGAAAACT  
TTATTGATAGCCTGGTAGCATCACTCTCTGCTGCGGTGTGCAACCTAGTCAAGATCCTAAAGGATACAGCTGCT  
ATAGATCTCGAAACCCGTCAGAAGTTTGGAGTCTTAGATGTTGCGACCAAAGATGGTTAATTAACCTTTAG  
CCAAGAATCACGCATGGGGCGTTATTGAAACACATGCTAGGAAGTACCACGTTGCACTTTTGGAGTATGATGA  
GCATGGAGTGGTAACTTGCGACAGTTGGAGAAGAGTGGCCGTGAGTCTGAGTCAATGGTTTATTCTGATAT  
GGCAAAGCTCAGAACACTGAGGAGATTATTAAGAGATGGTGAGCCTCATGTCAGCAGTGCTAAAGTCGTCT  
AGTTGACGGTGTCCCGGTTGTGGAAAGACAAAAGAGATTCTCTCGAAAGTAAATTTGAGGAAGATCTAAT  
CTTAGTACCGGTAAGCAGGCTGCTGAAATGATAAAGAGGCGTGCTAATGCGTCAGGAATAATTCAAGCCAC  
AAGAGATAATGTTCTGACTGTTGATTCAATTATAATGAATTACGGTAAAGGAACACGCTGTCAGTTCAAAAGG  
TTATTTATCGACGAAGGTCTGATGTTGCACACTGGTTGTGTGAATTTCTTGTCTATGTCTCTGTGCGAAATT  
GCATATGTTTATGGAGACACACAACAAATTCCATACATCAACAGAGTATCCGGTTTTCCGTACCCTGCACATTT  
TGCAAAAATAGAGTTGATGAGGTGGAACTCGCAGAACTACGCTGCGTTGTCCAGCCGACATTACCCACTAT  
CTTAACAGAAGGTACGAAGGACATGTCATGTGTACATCGTCGGTTAAAAAGTCAGTTTCTCAGGAAATGGTGA  
GCGGGGCCGAATGATCAATCCTGTATCTAAGCCATTGAATGGGAAAGTTTTGACTTTCACTCAGTCTGATAA  
AGAGGCGCTGCTTCTCGAGGATATACGGACGTCCATACAGTACATGAGGTACAAGGTGAGACATATGCAGA  
TGTGTCGTTGGTCAGATTGACTCCGACACCTGTATCTATCATCGCAGGAGATAGTCCGCACGTTCTCGTAGCTT  
TGTCAAGGCATACCCAAACATTGAAGTATTACACCGTAGTGATGGATCCTCTTGTAAGTATAATTAGGGATTGA  
GAAAACTTAGTTCTTACTTGTTAGATATGTATAAAGTAGATGCAGGGACCCAATAGCAATTACAGGTAGACT  
CCGTGTTTAAAGTTCTAATCTTTTTGTTGCAGCACCAAGACTGGAGATATCTCAGATATGCAATTTTACTAT  
GATAAGTGTCTCCAGGTAATAGCACCATGTTAAATACTATGATGCTGTTACCATGAGGTTGACTGACATTTT  
TCTTAATGTCAAAGATTGCATATTGGATTTCTCTAAGTCTGTGGCTGCACCGAAGGATCCGATCAAACCACTGA  
TTCCAATGGTACGAACGGCGGCAGAAATGCCACGCCAGACTGGACTATTGGAAAATTTGGTGGCGATGATCA  
AAAGAACTTTAATTCACCGGAGTTATCAGGAATAATCGACATTGAGAATACTGCATCTTTAGTAGTAGATAA  
ATTTTTGATAGTTACTTGCTTAAAGAAAAAAGAAAAACCAATAAAAAATGTTTCTTTATTTGTAGAGAGTCTCT  
CAATAGATGGTTAGAGAAGCAGGAGCAAGTGACCATTGGTCAGCTTGCGAGTTTTGATTTTGTGGATCTTCCT  
GCCGTTGATCAGTACAGGCATATGATTAAGCGCAACCTAAGCAGAAGCTGGATACATCAATTCAAAGCGAAT  
ATCCGGCCTTGCGAGACGATTGTGTATCATTCGAAAAAGATCAACGCAATCTTCGGTCCTTTGTTCAAGTGAGCTC  
ACAAGGCAAATGCTCGAAAGCATAGACTCAAGTAAGTTTTTGTCTTTACAAGGAAGACGCCAGCTCAAATTG  
AGGATTTCTTCGGAGATCTCGATAGCCATGTCCCTATGGATATCTTGAGTTGGATATTTGCAAGTATGACAAA  
TCTCAGAACGAGTTCCACTGTGCAGTAGAGTATGAAATATGGAGAAGACTTGGATTAGAAGATTTTCTGGGA  
GAAGTTTGAAACAAGGCCACAGAAAACTACTCTTAAAGATTACACAGCTGGTATTAAAACGTGTTTATGGT  
ACCAGAGAAAAGAGTGGGGACGTTACAACATTATCGGTAATACGGTGATTATTGCTGCTTGTTAGCTTCCAT  
GTTGCCCATGGAGAAAATAATCAAAGGTGCATTTTTCGGAGATGACAGTTTGCTATACTTCCAAAAGGTTGT  
GAGTTTCTGACATACAGCATAACGCCAACCCTTATGTGGAATTTGAGGCTAAGCTATTCAGAAAGCAGTATG  
GTTATTTCTGTGGAAGGTACGTGATACATCATGACAGAGGGTGTATTGTTTATTACGACCCTTTGAAGTTGATT  
TCTAACTTGGTGCTAAACACATCAAGGATTGGGATCACTTAGAAGAGTTCAGAAGATCCCTTTGTGATGTTG  
CAATTCGTTGAACAACTGTGCGTATTACACGCGAGTTGGACGACGCTGTGAGTGAGGTCCATAAAACCGCACC

CCCGGGTTCGTTTGTATAAAAGTTTAGTTAAATATCTGTCCGATAAGGTTCTTTTTAGAAGTTTGTATAGA  
TGGCTCTTGTTAAGGGTAAAGTCAATATTAATGAGTTCATAGACTTGTCAAATCAGAAAAATTTCTCCGTCT  
ATGTTACACCTGTTAAGAGTGTCTGATCTCCAAGGTTGATAAGATATTGGTTCATGAAGATGAATCTTTGTC  
CGAAGTCAATTTACTCAAAGGTGTAAACTCATTGATGGTGGCTATGTACATCTTGCTGGTCTTGTTGGTGACA  
GGTGAATGGAATTTGCCAGATAATTGTCGTGGTGGTGTGAGTGTCTGTTTGGTCGATAAGAGAATGGAGAGA  
GCGGACGAGGCAACTCTTGCTTCATACTATACCGCAGCGGCTAAGAAAAGGTTTCAGTTCAAAGTCGTTCCAA  
ATTACAACATCACTACCAAGGACGCAGAAAAGGCAGTTTGGCAAGTACTAGTTAATATTAGAAATGTTAAAT  
TGCTGCGGGTACTGTCCGCTGTCATTAGAATTTGTGTGAGTGTGATTGTTTATAAAAATATTATAAACTCG  
GTTTGAGAGAGAAAATTACGAGCGTCACGGATGGAGGGCCCATGGAATATCAGAAGAAGTTGTTGATGAG  
TTCATGGAAGAAGTCCCGATGTCTGTAAGGCTTGCAAAATTTGTTTGAAGACCGGAAAAAGTTTAGTAGTA  
AAAGTGAGAATAATAGTGGTAATAATAGGCCGAAACCAGACAAAAACCAAGGAAGGAAAAGGGTTTAAAA  
GTTAGGGTTGAGAAGGATAATTTAATTGATAATGAATTGGAGACTTACGTCGCCGATTGAGATTGCTATTAAA  
TATGTCTTACACAATCGCAACTCCATCGCAATTTGTGTTTTTGTATCAGCATGGGCCGACCCTATAGAATTAAT  
AAATTTATGTACTAATTCAGTGAATCAGTTCCAAACACAACAAGCTAGAACAAACGTTCAACGGCAATTTA  
GCGAAGTGTGGAAACCTGTCCCTCAAGTCACTGTTAGGTTTCTGACAGTGGTTTAAAGGTGTATAGGTACAA  
CGCGGTACTAGATCCTCTAGTTACTGCTTTGTTAGGAGCTTCGATACTAGAAATAGGATTATAGAAGTCGAA  
AATCAGGCGAACCCGACAACCGCCGAAACGTTAGACGCTACTCGTAGAGTAGATGACGCAACGGTGGCTATA  
AGGAGCGCTATAAATAATTTAGTAGTAGAATTGGTCAAAGGAACAGGTTTGTACAATCAAAGCACATTTGAAA  
GTGCATCTGGTTTACAATGGTCTCTGCACCTGCATCTTGA

#OM515235

1

ATGGCATACACACAGACAGCTACCACATCCGCTTTGCTCGACACTGTCCGAGGTAACAATACCTTGGTCAATG  
ATCTTGCGAAGCGGCGTCTTTATGACACAGCGGTCGACGAGTTCAACGCTCGTGATCGCAGGCCCAAAGTAA  
ATTTTCCAAAGTAATAAGTGAGGAACAGACGCTTATTGCTACTAGGGCATATCCAGAATTCAGATAACCTTC  
TATAATACGCAGAACGCCGTGCATTGCTTGCCGGTGGACTACGATCCTTAGAACTGGAATATCTAATGATGC  
AGATCCCGTACGGATCACTCACATATGATATAGGTGGGAATTTGATCTCATCTGTTCAAAGGACGGGCATA  
TGTTCACTGCTGTATGCCAATCTTGATGTCCGCGACATAATGCGGCACGAAGGCCAGAAAGACAGTATAGAA  
TTATACCTTTCCAGGCTTGAGCGGGGCAACAAAGTTGTCCCAAATTTCAAAGGAAGCTTTTACAGATACG  
CTGAAACGCCAGACGAAGTTGTCTGTACAGTACCTTCAAACGTGTACGCACCAGCAGGTGGAAAACCTCAG  
GCAGGGTGTATGCTATTGCATTGCACAGTATATACGATATACCTGCTGATGAATTCGGAGCGGCACTTTTAA  
GAAAAATGTCCATGTTTGTACGCCGCTTCCACTTTTCCGAGAATTTACTTCTCGAAGATTCACACGTCAACCT  
TGACGAAATCAACGCGTGTGTTTTCGCGTGATGGAGACAAGCTGACTTTTCTTTCGCATCTGAGAGCACTTTAA  
ATTATTGTCATAGTTATTCTAATATTTTAAAAATACGTGTGCAAACTTACTTCCCGGCATCTAATAGAGAGGTCT  
ACATGAAGGAGTTTTTAGTCACCAGGGTTAACACCTGGTTTTGTAAGTTTTCTAGGATAGATACTTTTTATTAT  
ACAAGGGGGTAGCCCAAAAGGTGTAAATAGTGAGCAATTTTACAGCGCAATGGAAGATGCATGGCACTACA  
AAAAGACTCTTGCAATGTGTAAACAGCGAGAGGATTCTTCTGAAGATTCCTCATCGGTCAATTACTGGTCCCA  
AAAATGAGAGATATGGTCATAGTTCTCTATTGACATATCTCTCGACACCAGTAAAAGGACCCGCAAGAAG  
TCTTAGTGTCAAAGGATTTTGTATTACAGTTTTTAAATCACATTCGCATTATCAAGCCAAGGCACTTACATACT  
CCAATGTTTTATCCTTTGTGCAATCAATTCGTTCAAGGGTAATTATCAACGGAGTGACTGCCAGGTCTGAGTGG  
GATGTTGACAAATCTTTTTGCAATCCTTGCCATGACATTTTTCTTGCTACTAAGCTTGCCGTTTTAAAAGAC  
GAATTGTTAATCAGCAAGTTTAGTTTGGGGCCAAAATCAGTAAGCCAGCATGTATGGGATGAGATTTCCCTGG  
CTTTTGAAACGCATTTCCATCGATCAAGGAGAGACTGCTAAATCGGAACTAATTAAGTGTGGGAGACGC  
ATTAGAAATCAGGGTGCCTGATTTATATGTGACTTTTACGATAGATTAGTGACTGAGTACAAAACATCGGTG

GATATGTCAGTGCTTGATATCAGAAAGAGAATGGAGGAGACTGAGGTTATGTACAATGCATTGTCTGAGCTA  
TCTGTGCTCAAGGAGTCGGACAAGTTTCGACGTTGATGTTTTTTCCCGGATGTGCCAGACTTTGGAGGTAGACC  
CAATGACTGCAGCAAAGGTTATAGTGGCAGTGATGAGCAACGAGAGCGGACTGACTCTTACATTCGAACAGC  
CAACTGAAGCAAATGTCGCATTGGCACTTAAAGATTGAGAAAAAGCCTCTGAGGGTGCAGTAGTGGTTACTTC  
TAGAGATGTTGAAGAACCATCCATGAAGGGTTCATGGCAAGAGGAGAGTTACAATTGGCCGGTCTGTCTGG  
AGACCAACCAGAGTCTTCCTATACTCGGAACGAGGAAATAGAGTCATTAGAGCAATTCACATGGCAACGGCT  
AGTTCGTTAATTCGGAAACAGATGAGTTCGATTGTGTACACGGGCCCCATTAAAGTTCAGCAAATGAAAACT  
TTATTGATAGCCTGGTAGCATCACTCTCTGCTGCGGTGTCGAACCTAGTCAAGATCCTAAAGGATACAGCTGCT  
ATAGATCTCGAAACCCGTCAGAAGTTTGGAGTCTTAGATGTTGCGACCAAAGATGGTTAATTAACCTTTAG  
CCAAGAATCACGCATGGGGCGTTATTGAAACACATGCTAGGAAGTACCACGTTGCACTTTTGGAGTATGATGA  
GCATGGAGTGGTAACTTGCGACAGTTGGAGAAGGGTGGCCGTGAGTCTGAGTCAATGGTTTATTCTGATAT  
GGCAAAGCTCAGAACACTGAGGAGATTATTAAGAGATGGTGAGCCTCATGTCAGCAGTGCTAAAGTCGTCCT  
AGTTGACGGTGTCCCGGGTTGTGGAAAGACAAAAGAGATTCTCTCGAAAGTAAATTTTGAGGAAGATCTAAT  
CTTAGTACCGGTAAGCAGGCTGCTGAAATGATAAAGAGGCGTGCTAATGCGTCAGGAATAATTCAAGCCAC  
AAGAGATAATGTTCTGACTGTTGATTCAATTTATAATGAACTACGGTAAAGGAACACGCTGTCAGTTCAAAAGG  
TTATTTATCGACGAAGGTCTGATGTTGCACACTGGTTGTGTGAATTTCTTGTCTCTATGTCTCTGTGCGAAATT  
GCATATGTTTATGGAGACACACAACAAATTCCATACATCAACAGAGTATCCGGTTTTCCGTACCCTGCACATTT  
TGCAAAAATAGAGGTTGATGAGGTGGAACTCGCAGAACTACGCTGCGTTGTCCAGCCGACATTACCCACTAT  
CTTAACAGAAGGTACGAAGGACATGTCATGTGTACATCGTCGGTTAAAAAGTCAGTTTCTCAGGAAATGGTGA  
GCGGGGCCGCAATGATCAATCCTGTATCTAAGCCATTGAATGGGAAAGTTTTGACTTTCACTCAGTCTGATAA  
AGAGGTGCTGCTTCTCGAGGATATACGGACGTCCATACAGTACATGAGGTACAAGGTGAGACATATGCAGA  
TGTGTCGTTGGTCAGATTGACTCCGACACCTGTATCTATCATCGCAGGAGATAGTCCGCACGTTCTCGTAGCTT  
TGTC AAGGCATACCCAAACATTGAAGTATTACACCGTAGTGATGGATCCTCTTGTAAGTATAATTAGGGATTGA  
GAAAACTTAGTTCTTACTTGTTAGATATGTATAAAGTAGATGCAGGGACCCAATAGCAATTACAGGTAGACT  
CCGTGTTTAAAGGTTCTAATCTTTTTGTTGCAGCACCAAAGACTGGAGATATCTCAGATATGCAATTTTACTAT  
GATAAGTGCTCTCCAGGTAATAGCACCATGTTAAATAACTATGATGCTGTTACCATGAGGTTGACTGACATTTT  
TCTTAATGTCAAAGATTGCATATTGGATTTCTCTAAGTCTGTGGCTGCACCGAAGGATCCGATCAAACCACTGA  
TTCCAATGGTACGAACGGCGGCAGAAATGCCACGCCAGACTGGACTATTGGAAAATTTGGTGGCGATGATCA  
AAAGAACTTTAATTCACCGGAGTTATCAGGAATAATCGACATTGAGAATACTGCATCTTTAGTAGTAGATAA  
ATTTTTGATAGTTACTTGCTTAAAGAAAAAAGAAAACCAAATAAAAAATGTTTCTTTATTTGTAGAGAGTCTCT  
CAATAGATGGTTAGAGAAGCAGGAGCAAGTGACCATTGGTCAGCTTGCGGATTTTGATTTGTGGATCTTCCT  
GCCGTTGATCAGTACAGGCATATGATTAAGCGCAACCTAAGCAGAAGCTGGATACATCAATTCAAAGCGAAT  
ATCCGGCCTTGACAGCAGATTGTGTATCATTCGAAAAAGATCAACGCAATCTTCGGTCCTTTGTTCAGTGAGCTC  
ACAAGGCAAATGCTCGAAAGCATAGACTCAAGTAAGTTTTTGTCTTTACAAGGAAGACGCCAGCTCAAATTG  
AGGATTTCTTCGGAGATCTCGATAGCCATGTCCCTATGGATATCTTGAGTTGGATATTTGCAAGTATGACAAA  
TCTCAGAACGAGTTCCTGTGAGTAGAGTATGAAATATGGAGAAGACTTGGATTAGAAGATTTTCTGGGA  
GAAGTTTGAAACAAGGCCACAGAAAACTACTCTTAAAGATTACACAGCTGGTATTAAAACGTGTTTATGGT  
ACCAGAGAAAAGAGTGGGGACGTTACAACATTATCGGTAATACGGTGATTATTGCTGCTTGTTTAGCTTCCAT  
GTTGCCCATGGAGAAAATAATCAAAGGTGCATTTTGCGGAGATGACAGTTTACTATACTTCCCAAAGGTTGT  
GAGTTTCTGACATACAGCATACAGCCAACCTTATGTGGAATTTGAGGCTAAGCTATTGAGAAAGCAGTATG  
GTTATTTCTGTGGAAGGTACGTGATACATCATGACAGAGGGTGTATTGTTTATTATGACCTTTGAAGTTGATT  
TCTAACTTGGTGCTAAACACATCAAGGATTGGGATCACTTAGAAGAGTTCAGAAGATCCCTTTGTGATGTTG  
CAATTCGTTGAACAACCTGTGCGTATTACACGCAAGTTGGACGACGCTGTGAGTGAGGTCCATAAAACCGCACC  
CCCGGGTTCGTTTGTATAAAAGTTTGTGTTAAATATCTGTCCGATAAGGTTCTTTTTAGAAAGTTTGTATAGA  
TGGCTCTTGTTAAGGGTAAAGTCAATATTAATGAGTTCATAGACTTGTCAAATCAGAAAAATTTCTCCGTCT  
ATGTTACACCTGTTAAGAGTGTGATCTCCAAGGTTGATAAGATATTGGTTCATGAAGATGAATCTTTGTC  
CGAAGTCAATTTACTCAAAGGTGTAAACTCATTGATGGTGGCTATGTACATCTTGCTGGTCTTGTTGGTGACA  
GGTGAATGGAATTTGCCAGATAATTGTCGTGGTGGTGTGAGTGTCTGTTTGGTCGATAAGAGAATGGAGAGA



GCGGACGAGGCAACTCTTGCTTCATACTATACCGCAGCGGCTAAGAAAAGGTTTCAGTTCAAAGTCGTTCCAA  
ATTACAACATCACTACCAAGGACGCAGAAAAGGCAGTTTGCCAAGTACTAGTTAATATTAGAAATGTTAAAAT  
TGCTGCGGGTTACTGTCCGCTGTCATTAGAATTTGTGTCAAGTGTGTATTGTTTATAAAAATATTATAAACTCG  
GTTTGAGAGAGAAAATTACGAGCGTTACGGATGGAGGGCCCATGGAATATCAGAAGAAGTTGTTGATGAGT  
TCATGGAAGAAGTCCCGATGTCTGTAAGGCTTGCAAAATTCGTTTGAAGACCGGAAAAAAGTTTAGTAGTAA  
AAGTGAGAATAATAGTGGTAATAATAGGCCGAAGCCAGGCAAAAACCAAAGGAAGGAAAAGGGTTTAAAAG  
TTAGGGTTGAGAAGGATAATTTAATTGATAATGAATTGGAGACTTACGTGCGCGATTAGATTTCGTATTAAAT  
ATGTCTTACACAATCGCAACTCCATCGCAATTTGTGTTTTGTATCAGCATGGGCCGACCCTATAGAATTAATA  
AATTTATGTACTAATTCAGTAGGTAATCAGTTCCAAACACAACAAGCTAGAACAAACCGTTCAACGGCAATTTAG  
CGAAGTGTGGAAACCTGTCCCTCAAGTCACTGTTAGGTTTCTGACAGTGGTTTTAAGGTGTATAGGTACAAT  
GCGGTACTAGATCCTCTAGTTACTGCTTTGTTAGGAGCTTCGATACTAGAAATAGGATTATAGAAGTCGAAA  
ATCAGGCGAACCCGACAACCGCCGAAACGTTAGACGCTACTCGTAGAGTAGATGACGCAACGGTGGCTATAA  
GGAGCGCTATAAATAATTTAGTAGTAGAATTGGTCAAAGGAACAGGTTTGTACAATCAGAGCACATTTGAAA  
GTGCATCCGGTTTACAATGGTCCTCTGCACCTGCATCTTGA

#OM515248

1

ATGGCATACACACAGACAGCTACCACATCCGCTTTGCTCGACACTGTCCGAGGTAACAATACCTTGGTCAACG  
ATCTTGCGAAGCGGCGTCTTTATGACACAGCGGTGCGAGGTTCAACGCTCGTGATCGCAGGCCCAAAGTAA  
ATTTTTCCAAAGTAATAAGTGAGGAACAGACGCTTATTGCTACTAGGGCATATCCAGAATTCAGATAACCTTC  
TATAATACGCAGAACGCCGTGCATTGCTTGCCGGTGGACTACGATCCTTAGAACTGGAATATCTAATGATGC  
AGATCCCGTACGGATCACTCACATATGATATAGGTGGGAATTTGCATCTCATCTGTTCAAAGGACGGGCATA  
TGTTCACTGCTGTATGCCAATCTTGATGTCCGCGACATAATGCGGCACGAAGGCCAGAAAGACAGTATAGAA  
TTATACCTTTCCAGGCTTGAGCGGGGCAACAAAGTTGTCCCAAATTTCCAAAAGGAAGCTTTTGACAGATACG  
CTGAAACGCCAGACGAAGTTGTCTGTACAGTACCTTTCAAACGTGTACGCACCAGCAGGTGGAAAACACAG  
GCAGGGTGTATGCTATTGCATTGCACAGTATATACGATATACCTGCTGATGAATTCGGAGCGGCACTTTTAAG  
GAAAAATGTCCATGTTTGTACGCCGCCTTCCACTTTTCCGAGAATTTACTTCTCGAAGATTCACACGTCAACCT  
TGACGAAATCAACGCGTGTCTTTCGCGTGATGGAGACAAGCTGACTTTTTCTTTCGCATCTGAGAGCACTTTAA  
ATTATTGTCATAGTTATTCTAATATTTTAAAATACGTGTGCAGAACTTACTTCCCGGCATCTAATAGAGAGGTCT  
ACATGAAGGAGTTTTTGGTCACCAGGGTTAACACCTGGTTTTGTAAGTTTTCTAGGATAGATACTTTTTTATTAT  
ACAAGGGGGTAGCCCAAAAGGTGTAAATAGTGAGCAATTTTACAGCGCAATGGAAGATGCATGGCACTACA  
AAAAGACTCTTGCAATGTGTAAACAGCGAGAGGATTCTTCTGAAGATTCCTCATCGGTCAATTACTGGTCCCA  
AAAATGAGAGATATGGTCATAGTTCTCTATTGACATATCTCTCGACACCAGTAAAAGGACCCGCAAAGAAG  
TCTTAGTGTCAAAGGATTTTGTATTACAGTTTTTAAATCACATTCGCACCTTATCAAGCCAAGGCACTTACATACT  
CCAATGTTTTATCCTTTGTGCAATCAATTCGTTCAAGGGTAATTATCAACGGAGTGACTGCCAGGTCTGAGTGG  
GATGTTGACAAATCTCTTTTGAATCCTTGTCCATGACATTTTTCTTGCATACTAAGCTTGCCGTTTTAAAAGAC  
GAATTGTTAATCAGCAAGTTTAGTTTGGGGCCAAAATCAGTAAGCCAGCATGTATGGGATGAGATTTCCCTGG  
CTTTTGAAACGCATTTCCATCGATCAAGGAGAGACTGCTAAATCGGAACTAATTAAGTGTGCGGAGACGC  
ATTAGAAATCAGGGTGCCTGATTTATATGTGACTTTTACGATAGATTAGTGACTGAGTACAAAACATCGGTG  
GATATGCCAGTGCTTGATATCAGAAAGAGAATGGAGGAGACTGAGGTTATGTACAATGCACTGTCTGAGCTA  
TCTGTGCTCAAGGAGTCGGACAAGTTGACGTTGATGTTTTTCCCGGATGTGCCAGACTTTGGAGGTAGACC  
CAATGACTGCAGCAAAGGTTATTGTGGCAGTGATGAGCAACGAGAGCGGACTGACTCTTACATTGCAACAGC  
CAACTGAAGCAAATGTGCAATTGGCACTTAAAGATTAGAAAAAGCCTCTGAGGGTGAAGTGTGTTACTTC  
TAGAGATGTTGAAGAACCGTCCATGAAGGGTTCAATGGCAAGAGGAGAGTTACAATTGGCCGGTCTGTCTGG

AGACCAACCAGAGTCTTCCTATACTCGGAACGAGGAAATAGAGTCATTAGAGCAATTCCACATGGCAACGGCT  
AGTTCGTTAATTCGGAACAGATGAGTTCGATTGTGTACACGGGCCCATTAAGTTCAGCAAATGAAAACT  
TTATTGATAGCCTGGTAGCATCACTCTCTGCTGCGGTGTCGAACCTAGTCAAGATCCTAAAGGATACAGCTGCT  
ATAGATCTCGAAACCCGTCAGAAGTTTGGAGTCTTAGATGTTGCGACCAAAGATGGTTAATTAACCTTTAG  
CCAAGAATCACGCATGGGGCGTTATTGAAACACATGCTAGGAAGTACCACGTTGCACTTTTGGAGTATGATGA  
GCATGGAGTGGTAACTTGCACAGTTGGAGAAGGGTGGCCGTGAGTTCTGAGTCAATGGTTTATTCTGATAT  
GGCAAAGCTCAGAACACTGAGGAGATTATTAAGGGATGGTGAGCCTCATGTGAGCAGTGCTAAAGTCGTCT  
AGTTGACGGTGTCCCGGGTTGTGGAAAGACAAAAGAGATTCTCTCAAAGTAAATTTTGAGGAAGATCTAAT  
CTTAGTACCGGTAAGCAGGCTGCTGAAATGATAAAGAGGCGTGCTAATGCGTCAGGAATAATTCAAGCCAC  
AAGAGATAATGTTCTGACTGTTGATTCAATTTATAATGAATTACGGTAAAGGAACACGCTGTGAGTTCAAAAGG  
TTATTTATCGACGAAGGTCTGATGTTGCACACTGGTTGTGTGAATTTCTGTTTCTATGTCTCTGTGCGAAATT  
GCATATGTTTATGGAGACACACAACAAATTCATACATCAACAGAGTATCCGGTTTTCCGTACCCTGCACATTT  
TGCAAAAATAGAGGTTGATGAGGTGGAACTCGCAGAACTACGCTGCGTTGCCAGCCGACATTACCCACTAT  
CTTAACAGAAGGTACGAAGGACATGTCATGTGTACATCGTCGGTTAAAAAGTCAGTTTCTCAGGAAATGGTGA  
GCGGGGCCGCAATGATCAATCCTGTATCTAAGCCACTGAATGGGAAAGTTTTGACTTTCACTCAGTCTGATAA  
AGAGGCGCTGCTTCTCGAGGATATACGGACGTCCATACAGTACATGAGGTACAAGGTGAGACATATGCAGA  
TGTGTCGTTGGTCAGATTGACTCCGACACCTGTATCTATCATCGCAGGAGATAGTCCGCACGTTCTCGTAGCTT  
TGTCAAGGCATACCCAAACATTGAAGTATTACCCGTAGTGATGGATCCTCTTGTAAGTATAATTAGGGATTTA  
GAAAACTTAGTTCTTACTTGTTAGATATGTATAAAGTAGATGCAGGGACCCAATAGCAATTACAGGTAGACT  
CCGTGTTTAAAGGTTCTAATCTTTTTGTTGCAGCACCAAAGACTGGAGATATCTCAGATATGCAATTTTACTAT  
GATAAGTGCTCTCCAGGTAATAGCACCATGTTAAATACTATGATGCTGTTACCATGAGGTTGACTGACATTTT  
TCTTAATGTCAAAGATTGCATATTGGATTTCTCTAAGTCTGTGGCTGCACCGAAGGATCCGATCAAACCACTGA  
TTCCAATGGTACGAACGGCGGCAGAAATGCCACGCCAGACTGGACTATTGGAAAATTTGGTGGCGATGATCA  
AAAGAACTTTAATTCACCGGAGTTATCAGGAATAATCGACATTGAGAATACTGCATCTTTAGTAGTAGATAA  
ATTTTTGATAGTTACTTGCTTAAAGAAAAAGAAAACCAAATAAAAATGTTTCTTTATTTAGTAGAGAGTCTC  
TCAATAGATGGTTAGAGAAGCAGGAGCAAGTGACCATTGGTCAGCTTGCAGATTTTGATTTTGTGGATCTTCC  
TGCCGTTGATCAGTACAGGCATATGATTAAAGCGCAACCTAAGCAGAAGCTGGATACATCAATTCAAAGCGAA  
TATCCGGCCTTGACAGCATTGTGTATCATTCGAAAAAGATCAACGCAATCTTCGGTCTTTGTTCAAGTACGCT  
CACAAGGCAAATGCTCGAAAGCATAGACTCAAGTAAGTTTTGTTCTTTACAAGGAAGACGCCAGCTCAAATT  
GAGGATTTCTTCGAGATCTCGATAGCCATGTCCCTATGGATATCTTGAGTGGATATTTGAAAGTATGACA  
AATCTCAGAACGAGTTCCACTGTGCAGTAGAGTATGAAATATGGAGAAGACTTGGATTAGAAGATTTTCTGG  
GAGAAGTTTGGAAACAAGGCCACAGGAAAACACTCTTAAAGATTACACAGCTGGTATTTAAACGTGTTTATG  
GTACCAGAGAAAAGAGTGGGGACGTTACAACATTATCGGTAATACGGTGATTATTGCTGCTTGTGTTAGCTTCC  
ATGTTGCCCATGGAGAAAATAATCAAAGGTGCATTTTTCGGAGATGACAGTTTACTATACTTCCCAAAGGTT  
GTGAGTTTCTGACATACAGCATAACGCCAACCTTATGTGGAATTTGAGGCTAAGCTATTCAGAAAGCAGTA  
TGTTATTTCTGTGGAAGGTACGTGATACATCATGACAGAGGGTGTATTGTTTATTATGACCTTTGAAGTTGA  
TTTCTAACTTGGTGCTAAACACATCAAGGATTGGGATCACTTAGAAGAGTTCAGAAGATCCCTTTGTGATGTT  
GCAAATTCGTTGAACAACTGTGCGTATTACACGCAGTTGGACGACGCTGTGAGTGAGGTCCATAAAACCGCAC  
CCCCGGGTTGTTTTGTGTATAAAAGTTTAGTTAAATATCTGTCCGATAAGGTTCTTTTGAAGTTTGTGTTATG  
ATGGCTCTTGTTAAGGGTAAAGTCAATATTAATGAGTTCATAGACTTGTCAAATCAGAAAAATTTCTTCCGTC  
TATGTTACACCTGTTAAGAGTGTGATGATCTCCAAGGTTGATAAGATATTGGTTCATGAAGATGAATCTTTGT  
CCGAAGTCAATTTACTCAAAGGTGTAAACTCATTGATGGTGGCTATGTACATCTTGCTGGTCTTGTTGGTGACA  
GGTGAATGGAATTTGCCAGATAATTGTCGTGGTGGTGTGAGTGTCTGTTTGGTCGATAAGAGAATGGAGAGA  
GCGGACGAGGCAACTCTTGCTTCATACTATACCGCAGCGGCTAAGAAAAGGTTTCAGTTCAAAGTCGTTCCAA  
ATTACAACATCACTACCAAGGACGCAGAAAAGGCAGTTTGGCAAGTACTAGTTAATATTAGAAATGTTAAAT  
TGCTGCGGGTACTGTCCGCTGTCATTAGAATTTGTGTGAGTGTGATTGTTTATAAAAATATTATAAAACTCG  
GTTTGAGAGAGAAAATTACGAGCGTCACGGATGGAGGGCCCATGGAATATCAGAAGAAGTTGTTGATGAG  
TTCATTGAAGAAGTCCCGATGTCTGTGAGGCTTGCAAAATTTGTTTCAAGACCGGAAAAAGTTTAGTAGTA

AAAGTGAGAATAATAGTGGTAATAATAGGTCGAAACCAAACAAAAACCAAAGGAAGGAAAAGGGTTTAAAA  
GTTAGGGTTGAGAAGGATAATTTAATTGATAATGAATTGGAGACTTACATCGCCGATTGAGATTCGTATTAAA  
TATGTCTTACACAATCGCAACTCCATCGCAATTTGTGTTTTTGTATCAGCATGGGCCGACCCTATAGAATTAAT  
AAATTTATGTACTAATTCAGTGGTAATCAGTTCCAAACACAACAAGCTAGAACAAACCGTTCAACGGCAATTTA  
GCGAAGTGTGGAAACCTGTCCCTCAAGTCACTGTTAGGTTTCCTGACAGTGGTTTTAAGGTGTATAGGTACAA  
TGCGGTACTAGATCCTCTAGTTACTGCTTTGTTAGGAGCTTCGATACTAGAAATAGGATTATAGAAGTCGAAA  
ATCAGGCGAACCCGACAACCGCCGAAACGTTAGACGCTACTCGTAGAGTAGATGACGCAACGGTGGCTATAA  
GGAGCGCTATAAATAATTTAGTAGTAGAATTGGTCAAAGGAACAGGTTTGTACAATCAGAGCACATTTGAAA  
GTGCATCCGGTTTACAATGGTCCTCTGCACCTGCATCTTGA

#OM515258

1

ATGGCATACACACAGACAGCTACCACATCCGCTTTGCTCGACACTGTCCGAGGTAACAATACCTTGGTCAATG  
ATCTTGCGAAGCGGCGTCTTTATGACACAGCGGTGCGAGGTTCAACGCTCGTGATCGCAGGCCCAAAGTAA  
ATTTTTCCAAAGTAATAAGTGAGGAACAGACGCTTATTGCTACTAGGGCATATCCAGAATTCAGATAACCTTC  
TATAATACGCAGAACGCCGTGCATTGCTTGCCGGTGGACTACGATCCTTAGAACTGGAATATCTAATGATGC  
AGATCCCGTACGGATCACTCACATATGATATAGGTGGGAATTTTGCATCTCATCTGTTCAAAGGACGGGCATA  
TGTTCACTGCTGTATGCCAATCTTGATGTCCGCGACATAATGCGGCACGAAGGCCAGAAAGACAGTATAGAA  
TTATACCTTTCCAGGCTTGAGCGGGGCAACAAAGTTGTCCCAAATTTCCAAAGGAAGCTTTTGACAGATACG  
CTGAAACGCCAGACGAAGTTGTCTGTACAGTACCTTCCAAACGTGTACGCACCAGCAGGTGGAAAACACAG  
GCAGGGTGTATGCTATTGCATTGCACAGTATATACGATATACCTGCTGATGAATTCGGAGCGGCACTTTTAAG  
GAAAAATGTCCATGTTTGTACGCCGCCTTCCACTTTTCCGAGAATTTACTTCTCGAAGATTCACACGTCAACCT  
TGACGAAATCAACGCGTGTTCGCGTGATGGAGACAAGCTGACTTTTCTTTCGCATCTGAGAGCACTTTTAA  
ATTATTGTCATAGTTATTCTAATATTTTAAAATACGTGTGCAAACTTACTTCCCGGCATCTAATAGAGAGGTCT  
ACATGAAGGAGTTTTTAGTCACCAGGGTTAACACCTGGTTTTGTAAGTTTTCTAGGATAGATACTTTTTATTAT  
ACAAGGGGGTAGCCCAAAAGGTGTAAATAGTGAGCAATTTTACAGCGCAATGGAAGATGCATGGCACTACA  
AAAAGACTCTTGCAATGTGTAAACAGCGAGAGGATTCTTCTGAAGATTCCTCATCGGTCAATTACTGGTTCCCA  
AAAATGAGAGATATGGTCATAGTTCTCTATTGACATATCTCTCGACACCAGTAAAAGGACCCGCAAAGAAG  
TCTTAGTGTCAAAGGATTTTGTATTACAGTTTTAAATCACATTGCACTTATCAAGCCAAGGCACTTACATACT  
CCAATGTTTTATCCTTTGTGCAATCAATTCGTTCAAGGGTAATTATCAACGGAGTGACTGCCAGGTCTGAGTGG  
GATGTTGACAAATCTCTTTTGAATCCTTGTCATGACATTTTCTTGCATACTAAGCTTGCCGTTTTAAAAGAC  
GAATTGTTAATCAGCAAGTTTAGTTTGGGGCCAAAATCAGTAAGCCAGCATGTATGGGATGAGATTTCCCTGG  
CTTTTGAAACGCATTTCCATCGATCAAGGAGAGACTGCTAAATCGGAACTAATTAAGTGTGCGGAGACGC  
ATTAGAAATCAGGGTGCCTGATTTATATGTGACTTTTACGATAGATTAGTGACTGAGTACAAAACATCGGTG  
GATATGCCAGTGCTTGATATCAGAAAGAGAATGGAGGAGACTGAGGTTATGTACAATGCATTGTCTGAGCTA  
TCTGTGCTCAAGGAGTCGGACAAGTTGACGTTGATGTTTTTCCCGGATGTGCCAGACTTTGGAGGTAGACC  
CAATGACTGCAGCAAAGGTTATAGTGGCAGTGATGAGCAACGAGAGCGGACTGACTCTTACATTGCAACAGC  
CAACTGAAGCAAATGTCGATTGGCACTTAAAGATTGAGAAAAAGCCTCTGAGGGTGAAGTGTGTTACTTC  
TAGAGATGTTGAAGAACCATCCATGAAGGGTTCAATGGCAAGAGGAGAGTTACAATTGGCCGGTCTGTCTGG  
AGACCAACCAGAGTCTTCTATACTCGGAACGAGGAAATAGAGTCATTAGAGCAATTCACATGGCAACGGCT  
AGTTCGTTAATTCGGAAACAGATGAGTTGATTGTGTACACGGGCCCATTAAGTTGAGCAATGAAAACT  
TTATTGATAGCCTGGTAGCATCACTCTCTGCTGCGGTGTGCAACCTAGTCAAGATCCTAAAGGATACAGCTGCT  
ATAGATCTCGAAACCCGTCAGAAGTTTGGAGTCTTAGATGTTGCGACCAAAGATGGTTAATTAACCTTTAG  
CCAAGAATCACGCATGGGGCGTTATTGAAACACATGCTAGGAAGTACCACGTTGCACTTTTGGAGTATGATGA

GCATGGAGTGGTAACTTGCGACAGTTGGAGAAGGGTGGCCGTGAGTTCTGAGTCAATGGTTTATTCTGATAT  
GGCAAAGCTCAGAACACTGAGGAGATTATTAAGAGATGGTGAGCCTCATGTCAGCAGTGCTAAAGTCGTCT  
AGTTGACGGTGTCCCGGGTTGTGGAAAGACAAAAGAGATTCTCTCGAAAGTAAATTTTGAGGAAGATCTAAT  
CTTAGTACCGGGTAAGCAGGCTGCTGAAATGATAAAGAGGCGTGCTAATGCGTCAGGAATAATTCAAGCCAC  
AAGAGATAATGTTCTGACTGTTGATTCAATTTATAATGAACTACGGTAAAGGAACACGCTGTCAGTTCAAAAGG  
TTATTTATCGACGAAGGTCTGATGTTGCACACTGGTTGTGTGAATTTTCTGTTTCTATGTCTCTGTGCGAAATT  
GCATATGTTTATGGAGACACACAACAAATTCCATACATCAACAGAGTATCCGGTTTTCCGTACCCTGCACATTT  
TGCAAAAATAGAGGTTGATGAGGTGGAACCTCGCAGAACTACGCTGCGTTGTCCAGCCGACATTACCCACTAT  
CTTAACAGAAGGTACGAAGGACATGTCATGTGTACATCGTCGGTTAAAAAGTCAGTTTCTCAGGAAATGGTGA  
GCGGGGCCGCAATGATCAATCCTGTATCTAAGCCATTGAATGGGAAAGTTTTGACTTTCACTCAGTCTGATAA  
AGAGGCGCTGCTTTCTCGAGGATATACGGACGTCCATACAGTACATGAGGTACAAGGTGAGACATATGCAGA  
TGTGTCGTTGGTCAGATTGACTCCGACACCTGTATCTATCATCGCAGGAGATAGTCCGCACGTTCTCGTAGCTT  
TGTC AAGGCATACCCAAACATTGAAGTATTACCCGTAGTGATGGATCCTCTTGTAAGTATAATTAGGGATTTA  
GAAAACTTAGTTCTTACTTGTTAGATATGTATAAAGTAGATGCAGGGACCCAATAGCAATTACAGGTAGACT  
CCGTGTTTAAAGGTTCTAATCTTTTTGTTGCAGCACCAAAGACTGGAGATATCTCAGATATGCAATTTTACTAT  
GATAAGTGTCTCCAGGTAATAGCACCATGTTAAATACTATGATGCTGTTACCATGAGGTTGACTGACATTTT  
TCTTAATGTCAAAGATTGCATATTGGATTTCTCTAAGTCTGTGGCTGCACCGAAGGATCCGATCAAACCACTGA  
TTCCAATGGTACGAACGGCGGCAGAAATGCCACGCCAGACTGGACTATTGGAAAATTTGGTGGCGATGATCA  
AAAGAACTTTAATTCACCGGAGTTATCAGGAATAATCGACATTGAGAATACTGCATCTTTAGTAGTAGATAA  
ATTTTTGATAGTTACTTGCTTAAAGAAAAAGAAAACCAAATAAAAAATGTTTCTTTATTTGTAGAGAGTCTCT  
CAATAGATGGTTAGAGAAGCAGGAGCAAGTGACCATTGGTCAGCTTGACAGATTTTGATTTTGTGGATCTTCCT  
GCCGTTGATCAGTACAGGCATATGATTAAAGCGCAACCTAAGCAGAAGCTGGATACATCAATTCAAAGCGAAT  
ATCCGGCCTTGACAGACGATTGTGTATCATTGAAAAAGATCAACGCAATCTTCGGTCCTTTGTT CAGTGAGCTC  
ACAAGGCAAATGCTCGAAAGCATAGACTCAAGTAAGTTTTTGTCTTTACAAGGAAGACGCCAGCTCAAATTG  
AGGATTTCTTCGGAGATCTCGATAGCCATGTCCCTATGGATATCTTGAGTTGGATATTTGCAAGTATGACAAA  
TCTCAGAACGAGTTCCACTGTGCAGTAGAGTATGAAATATGGAGAAGACTTGGAATAGAAGATTTTCTGGGA  
GAAGTTTGAAACAAGGCCACAGAAAACTACTCTTAAAGATTACACAGCTGGTATTAAAACGTGTTTATGGT  
ACCAGAGAAAAGAGTGGGGACGTTACAACATTATCGGTAATACGGTGATTATTGCTGCTTGTTTAGCTTCCAT  
GTTGCCCATGGAGAAAATAATCAAAGGTGCATTTTGCGGAGATGACAGTTTACTATACTTCCAAAAGGTTGT  
GAGTTTCTGACATACAGCATAACAGCCAACCTTATGTGGAATTTGAGGCTAAGCTATTCAGAAAGCAGTATG  
GTTATTTCTGTGGAAGGTACGTGATACATCATGACAGAGGGTGTATTGTTTATTACGACCCTTTGAAGTTGATT  
TCTAACTTGGTGCTAAACACATCAAGGATTGGGATCACTTAGAAGAGTTCAGAAGATCCCTTTGTGATGTTG  
CAATTTCTGTTGAACAACTGTGCGTATTACACGCAGTTGGACGACGCTGTGAGTGAGGTCCATAAAACCGCACC  
CCCGGGTTCGTTTGTTTATAAAAGTTTAGTTAAATATCTGTCCGATAAGGTTCTTTTTAGAAAGTTTGTTTATAGA  
TGGCTCTTGTTAAGGGTAAAGTCAATATTAATGAGTTCATAGACTTGCAAAATCAGAAAAATTTCTCCGTCT  
ATGTTACACCTGTTAAGAGTGTGATCTCCAAGGTTGATAAGATATTGGTTCATGAAGATGAATCTTTGTC  
CGAAGTCAATTTACTCAAAGGTGTAAACTCATTGATGGTGGCTATGTACATCTTGCTGGTCTTGTTGGTGACA  
GGTGAATGGAATTTGCCAGATAATTGTCGTGGTGGTGTGAGTGTCTGTTTGGTCGATAAGAGAATGGAGAGA  
GCGGACGAGGCAACTCTTGCTTACTATACCGCAGCGCTAAGAAAAGGTTTCAGTTCAAAGTCGTTCCAA  
ATTACAACATCACTACCAAGGACGCAGAAAAGGCAGTTTGGCAAGTACTAGTTAATATTAGAAATGTTAAAT  
TGCTGCGGGTTACTGTCCGCTGTCATTAGAATTTGTGTGAGTGTGATTGTTTATAAAAATATTATAAACTCG  
GTTTGAGAGAGAAAATTACGAGCGTCACGGATGGAGGGCCCATGGAATATCAGAAGAAGTTGTTGATGAG  
TTCATGGAAGAAGTCCCGATGTCTGTAAGGCTTGCAAAATTTGTTTCGAAGACCGGAAAAAGTTTAGTAGTA  
AAAGTGAGAATAATAGTGGTAATAATAGGCCGAAGCCAGGCAAAAACCAAAGGAAGGAAAAGGGTTTAAAA  
GTTAGGGTTGAGAAGGATAATTTAATTGATAATGAATTGGAGACTTACGTCGCCGATTGAGATTCGTATTAAA  
TATGTCTTACACAATCGCAACTCCATCGCAATTTGTGTTTTTGTATCAGCATGGGCCGACCCTATAGAATTAAT  
AAATTTATGTACTAATTCAGTATGTAATCAGTTCCAAACACAACAAGCTAGAACAACCGTTCAACGGCAATTTA  
GCGAAGTGTGGAAACCTGTCCCTCAAGTCACTGTTAGGTTTCTGACAGTGGTTTTAAGGTGTATAGGTACAA

TGCGGTACTAGATCCTCTAGTTACTGCTTTGTTAGGAGCTTTCGATACTAGAAATAGGATTATAGAAGTCGAAA  
ATCAGGCGAACCCGACAACCGCCGAAACGTTAGACGCTACTCGTAGAGTAGATGACGCAACGGTGGCTATAA  
GGAGCGCTATAAATAATTTAGTAGTAGAATTGGTCAAAGGAACAGGTTTGTACAATCAGAGCACATTTGAAA  
GTGCATCCGGTTTACAATGGTCCTCTGCACCTGCATCTTGA

#OM515261

1

ATGGCATACACACAGACAGCTACCACATCCGCTTTGCTCGACACTGTCCGAGGTAACAATACCTTGGTCAACG  
ATCTTGCGAAGCGGCGTCTTTATGATACAGCGGTGCGACGAGTTCAACGCTCGTGATCGCAGGCCCAAAGTAAA  
TTTTTCCAAAGTAATAAGTGAGGAACAGACGCTTATTGCTACTAGGGCATATCCTGAATTCAGATAACCTTCT  
ATAATACGCAGAACGCCGTGCATTGCTTGCCGGTGGACTACGATCCTTAGAACTGGAATATCTAATGATGCA  
GATCCCGTACGGATCACTCACATATGATATAGGTGGGAATTTTGCATCTCATCTGTTCAAAGGACGGGCATAT  
GTTCACTGCTGTATGCCAATCTTGATGTCCGCGACATAATGCGGCACGAAGGCCAGAAAGACAGTATAGAAT  
TATACCTTTCCAGGCTTGAGCGGGGCAACAAAGTTGTCCCAAATTTCCAAAAGGAAGCTTTTGACAGATACGC  
TGAAACGCCAGACGAAGTTGTCTGTACAGTACCTTCCAAACGTGTACACACCAGCAGGTGGAAAACACAGG  
CAGGGTGTATGCTATTGCATTGCACAGTATATACGATATACCTGCTGATGAATTCGGAGCGGCACCTTTAAGG  
AAAAATGTCCATGTTTGTACGCCGCTTCCACTTTTCCGAGAATTTACTTCTCGAAGATTCACACGTCAACCTT  
GACGAAATCAACGCGTGTTCGCGTGATGGAGACAAGCTGACTTTTTCTTCGCATCTGAGAGCACTTTAA  
TTATTGTCATAGTTATTCTAATATTTTAAAATACGTGTGCAAACTTACTTCCCGGCATCTAATAGAGAGGTCTA  
CATGAAGGAGTTTTTGGTCACCAGGGTTAACACCTGGTTTTGTAAGTTTTCTAGGATAGATACTTTTTATTATA  
CAAGGGGGTAGCCCAAAAGGTGTAAATAGTGAGCAATTTACAGCGCAATGGAAGATGCATGGCACTACAA  
AAAGACTCTTGCAATGTGTAACAGCGAGAGGATTCTTCTGAAGATTCCTCATCGGTCAATTACTGGTTCCCAA  
AAATGAGAGATATGGTCATAGTTCCTCTATTCGACATATCTCTCGACACTAGTAAAGGACCCGCAAAGAAGT  
CTTAGTGTCAAAGGATTTTGTATTCACAGTTTTTAAATCACATTTCGCACTTATCAAGCCAAGGCACTTACATACTC  
CAATGTTTTATCCTTTGTCGAATCAATTCGTTCAAGGGTAATTATCAACGGAGTGACTGCCAGGTCTGAGTGG  
GATGTTGACAAATCTTTTTGCAATCCTTGTCATGACATTTTTCTTGCACTAAGCTTGCCGTTTTAAAAGAC  
GAATTGTTAATCAGCAAGTTTAGTTTGGGGCCAAAATCAGTAAGCCAGCATGTATGGGATGAGATTTCCCTGG  
CTTTTGAAACGCATTTCCATCGATCAAGGAGAGACTGCTAAATCGGAACTAATTAAGTGTGCGGAGACGC  
ATTAGAAATCAGGGTGCCTGATTTATATGTGACTTTTCACGATAGATTAGTGACTGAGTACAAAACATCGGTG  
GATATGCCAGTGCTTGATATCAGAAAGAGAATGGAGGAGACTGAGGTTATGTACAATGCATTGTCTGAGCTA  
TCTGTGCTCAAGGAGTCGGACAAGTTCGACGTTGATGTTTTTCCCGGATGTGCCAGACTTTGGAGGTAGACC  
CAATGACTGCAGCAAAGGTTATTGTGGCAGTGATGAGCAACGAGAGCGGACTGACTCTTACATTGCAACAGC  
CAACTGAAGCAAATGTCGATTGGCACTTAAAGATTGAGAAAAAGCCTCTGAGGGTGCCTAGTGGTTACTTC  
TAGAGATGTTGAAGAACCATCCATGAAGGGTTCAATGGCAAGAGGAGAGTTACAATTGGCCGGTCTGTCTGG  
AGACCAACCAGAGTCTTCCTATACTCGGAACGAGGAAATAGAGTCATTAGAGCAATTCACATGGCAACGGCT  
GGTTCGTTAATTCGGAACAGATGAGTTCGATTGTGTACACGGGCCCATTAAGTTTCAGCAAATGAAAACT  
TTATTGATAGCCTGGTAGCATCACTCTCTGCTGCGGTGTGCAACCTAGTCAAGATCCTAAAGGATACAGCTGCT  
ATAGATCTCGAAACCCGTCAGAAGTTTGGAGTCTTAGATGTTGCGACCAAAGATGGTTAATTAACCTTTAG  
CCAAGAATCACGCATGGGGCGTTATTGAAACACATGCTAGGAAGTACCACGTTGCACTTTTGGAGTATGATGA  
GCATGGAGTGGTAACTAGCGACAGTTGGAGAAGGGTGGCCGTGAGTTCTGAGTCAATGGTTTATTCTGATAT  
GGCAAAGCTCAGAACTGAGGAGATTATTAAGAGATGGTGAGCCTCATGTCAGCAGTGCTAAAGTCGTCTCT  
AGTTGACGGTGTCCCGGGTTGTGGAAGACAAAAGAGATTCTCTCGAAAGTAAATTTGAGGAAGATCTAAT  
CTTAGTACCGGGTAAGCAGGCTGCTGAAATGATAAAGAGGCGTGCTAATGCGTCAGGAATAATTCAAGCCAC  
AAGAGATAATGTTCTGACTGTTGATTCAATTTATAATGAATTACGGTAAAGGAACACGCTGTCAAGTTCAAAGG

TTATTTATCGACGAAGGTCTGATGTTGCACACTGGTTGTGTGAATTTCTTGTTTCAATGTCTCTGTGCGAAATT  
GCATATGTTTATGGAGACACACAACAAATTCCATACATCAACAGAGTATCCGGTTTTCCGTACCCTGCACATTT  
TGCAAAAATAGAGGTTGATGAGGTGGAACTCGCAGAACTACGCTGCGTTGTCCAGCCGACATTACCCACTAT  
CTTAACAGAAGGTACGAAGGACATGTCATGTGTACATCGTCGGTTAAAAAGTCAGTTTCTCAGGAAATGGTGA  
GCGGGGCCGAATGATCAATCCTGTATCTAAGCCATTGAATGGGAAAGTTTTGACTTTCACTCAGTCTGATAA  
AGAGGCGCTGCTTTCTCGAGGATATACGGACGTCCATACAGTACATGAGGTACAAGGTGAGACATATGCAGA  
TGTGTCGTTGGTCAGATTGACTCCGACACCTGTATCTATCATCGCAGGAGATAGTCCGCACGTTCTCGTAGCTT  
TGTCAAGGCATACCCAAACATTGAAGTATTACACCGTAGTGATGGATCCTCTTGTAAGTATAATTAGGGATTTA  
GAAAACTTAGTTCTTACTTGTTAGATATGTATAAAGTAGATGCAGGGACCCAATAGCAATTACAGGTAGACT  
CCGTGTTTAAAGGTTCTAATCTTTTTGTTGCAGCACAAAGACTGGAGATATCTCAGATATGCAATTTTACTAT  
GATAAGTGTCTCCAGGTAATAGCACCATGTTAAATACTATGATGCTGTTACCATGAGGTTGACTGACATTTT  
TCTTAATGTCAAAGATTGCATATTGGATTTCTCTAAGTCTGTGGCTGCACCGAAGGATCCGATCAAACCACTGA  
TTCCAATGGTACGAACGGCGGCAGAAATGCCACGCCAGACTGGACTATTGGAAAATTTGGTGGCGATGATCA  
AAAGAACTTTAATTCACCGGAGTTATCAGGAATAATCGACATTGAGAATACTGCATCTTAGTAGTAGATAA  
ATTTTTGATAGTTACTTGCTTAAAGAAAAAGAAAAACCAAATAAAAAATGTTTCTTTATTTGTAGAGAGTCTCT  
CAATAGATGGTTAGAGAAGCAGGAGCAAGTGACCATTGGTCAGCTTGCAGATTTTGATTTTGTGGATCTTCT  
GCCGTTGATCAGTACAGGCATATGATTAAAGCGCAACCTAAGCAGAAGCTGGATACATCAATTCAAAGCGAAT  
ATCCGGCCTTGACAGACGATTGTGTATCATTGAAAAAGATCAACGCAATCTTCGGTCTTTGTTTCAGTGAGCTC  
ACAAGGCAAATGCTCGAAAGCATAGACTCAAGTAAGTTTTGTTCTTTACAAGGAAGACGCCAGCTCAAATTG  
AGGATTTCTTCGGAGATCTCGATAGCCATGTCCCTATGGATATCTGGAGTTGGATATTTGGAAGTATGACAAA  
TCTCAGAACGAGTTCCACTGTGCAGTAGAGTATGAAATATGGAGAAGACTTGGATTAGAAGATTTTCTGGGA  
GAAGTTTGAAACAAGGCCACAGAAAACTACTCTTAAAGATTACACAGCTGGTATTAACCGTGTTTATGGT  
ACCAGAGAAAAGAGTGGGGACGTTACAACATTATCGGTAATACGGTGATTATTGCTGCTTGTTAGCTTCCAT  
GTTACCCATGGAGAAAATAATCAAAGGTGCATTTTGCGGAGATGACAGTTTACTATACTTCCAAAAGGTTGT  
GAGTTTCTGACATACAGCATAACAGCAACCTTATGTGGAATTTGAGGCTAAGCTATTCAGAAAGCAGTATG  
GTTATTTCTGTGGAAGGTACGTGATACATCATGACAGAGGGTGTATTGTTTATTATGACCTTTGAAGTTGATT  
TCTAACTTGGTGCTAAACACATCAAGGATTGGGATCACTTAGAAGAGTTCAGAAGATCCCTTTGTGATGTTG  
CAAATTCGTTGAACAACCTGTGCGTATTACACGCAGTTGGACGACGCTGTGAGTGAGGTCCATAAAACCGCACC  
CCCGGGTTCGTTTGATATAAAAGTTTAGTTAAATATCTGTCCGATAAGGTTCTTTTTAGAAGTTTGTATAGA  
TGGCTCTTGTTAAGGGTAAAGTCAATATTAATGAGTTCATAGACTTGTCAAATCAGAAAAATTTCTCCCGTCT  
ATGTTACACCTGTTAAGAGTGTGATCTCCAAGGTTGATAAGATATTGGTTCATGAAGATGAATCTTTGTC  
CGAAGTCAATTTACTCAAAGGTGTAAACTCATTGATGGTGGCTATGTACATCTTGCTGGTCTTGTTGGTGACA  
GGTGAATGGAATTTGCCAGATAATTGTCGTGGTGGTGTGAGTGTCTGTTTGGTCGATAAAGAATGGAGAGA  
GCGGACGAGGCAACTCTTGCTTCATACTATACCGCAGCGGCTAAGAAAAGGTTTCAGTTCAAAGTCGTTCCAA  
ATTACAACATCACTACCAAGGACGCAGAAAAGGCAGTTTGCAAGTACTAGTTAATATTAGAAATGTTAAAA  
TGCTGCGGGTACTGTCCGCTGTCATTAGAATTTGTGTGAGTGTGATTGTTTATAAAAAATATTATAAACTCG  
GTTTGAGAGAGAAAATTACGAGCGTCACGGATGGAGGGCCCATGGAATATCAGAAGAAGTTGTTGATGAG  
TTCATGGAAGAAGTCCCGATGTCTGTAAGGCTTGCAAAATTTGTTTGAAGACCGGGAAAAAGTTTAGTAGTA  
AAAGTGAGAATAATAGTGGAATAATAGGCCGAAACCAACAAAAACCAAAGGAAGGAAAAGGGTTTAAAA  
GTTAGGGTTGAGAAGGATAATTTAATTGATAATGAATTGGAGACTTACGTCGCCGATTGAGATTCGTATTAAA  
TATGTCTTACACAATCGCAACTCCATCGCAATTTGTGTTTTTGTATCAGCATGGGCCGACCCTATAGAATTAAT  
AAATTTATGTACTAATTCCTAGGTAATCAATTCAAACACAACAAGCTAGAACACCGTTCAACGGCAATTTA  
GCGAAGTGTGGAACCTGTCCCTCAAGTCACTGTTAGGTTTCTGACAGTGGTTTTAAGGTGTATAGGTACAA  
TGCGGTACTAGATCCTCTAGTTACTGCTTTGTTAGGAGCTTTGATACTAGAAATAGGATTATAGAAGTCGAAA  
ATCAGGCGAACCCGACAACCGCCGAAACGTTAGACGCTACTCGTAGAGTAGATGACGCAACGGTGGCTATAA  
GGAGCGCTATAATAATTTAGTAGTAGAATTGGTCAAAGGAACAGGTTTGTACAATCAGAGCACATTTGAAA  
GTGCATCCGGTTTACAATGGTCCTCTGCACCTGCATCTTGA

#OM515264

1

ATGGCATACACACAGACAGCTACCACATCCGCTTTGCTCGACACTGTCCGAGGTAACAATACCTTGGTCAATG  
ATCTTGCGAAGCGGCGTCTTTATGACACAGCGGTGCGACGAGTTCAACGCTCGTGATCGCAGGCCCAAAGTAA  
ATTTTTCCAAAGTAATAAGTGAGGAACAGACGCTTATTGCTACTAGGGCATATCCAGAATTCAGATAACCTTC  
TATAATACGCAGAACGCCGTGCATTGCTTGCCGGTGGACTACGATCCTTAGAACTGGAATATCTAATGATGC  
AGATCCCGTACGGATCACTCACATATGATATAGGTGGGAATTTTGCATCACATCTGTTCAAAGGACGGGCATA  
TGTTCACTGCTGTATGCCAATCTTGATGTCCGCGACATAATGCGGCACGAAGGCCAGAAAGACAGTATAGAA  
TTATACCTTTCCAGGCTTGAGCGGGGCAACAAAGTTGTCCCAAATTTCCAAAAGGAAGCTTTTGACAGATACG  
CTGAAACGCCAGACGAAGTTGTCTGTACAGTACCTTCCAAACGTGTACGCACCAGCAGGTGGAAAACACAG  
GCAGGGTGTATGCTATTGCATTGCACAGTATATACGATATACCTGCTGATGAATTCGGAGCGGCACTTTTAAG  
GAAAAATGTCCATGTTTGTACGCCGCTTCCACTTTTCCGAGAATTTACTTCTCGAAGATTCACACGTCAACCT  
TGACGAAATCAACGCGTGTTTTTCGCGTGATGGAGACAAGCTGACTTTTTCTTTCGCATCTGAGAGCACTTTAA  
ATTATTGTCATAGTTATTCTAATATTTTAAAATACGTGTGCAAACTTACTTCCCGGCATCTAATAGAGAGGTCT  
ACATGAAGGAGTTTTTAGTCACCAGGGTTAACACCTGGTTTTGTAAGTTTTCTAGGATTGATACTTTTTTATTAT  
ACAAGGGGGTAGCCCAAAAGGTGTAAATAGTGAGCAATTTTACAGCGCAATGGAAGATGCATGGCACTACA  
AAAAGACTCTTGCAATGTGTAAACAGCGAGAGGATTCTTCTGAAGATTCCTCATCGGTCAATTACTGGTTCCCA  
AAAATGAGAGATATGGTCATAGTTCTCTATTTCGACATATCTCTCGACACCAGTAAAAGGACCCGCAAAGAAG  
TCTTAGTGTCAAAGGATTTTGTATTACAGTTTTAAATCACATTGCACTTATCAAGCCAAGGCACTTACATACT  
CCAATGTTTTATCCTTTGTCGAATCAATTCGTTCAAGGGTAATTATCAACGGAGTGACTGCTAGGTCTGAGTGG  
GATGTTGACAAATCTTTTTGCAATCCTTGTCATGACATTTTTCTTGCATACTAAGCTTGCCGTTTTAAAAGAC  
GAAATGTTAATCAGCAAGTTTAGTTTGGGGCCAAAATCAGTAAGCCAGCATGTATGGGATGAGATTTCCCTGG  
CTTTTGAAACGCATTTCCATCGATCAAGGAGAGACTGCTAAATCGGAACTAATTAAGTGTCGGGAGACGC  
ATTAGAAATCAGGGTGCCTGATTTATATGTGACTTTTCACGATAGATTAGTGACTGAGTACAAAACATCGGTG  
GATATGCCAGTGCTTGATATCAGAAAGAGAATGGAGGAGACTGAGGTTATGTACAATGCATTGTCTGAGCTA  
TCTGTGCTCAAGGAGTCGGACAAGTTTCGACGTTGATGTTTTTCCCGGATGTGCCAGACTTTGGAGGTAGACC  
CAATGACTGCAGCAAAGGTTATAGTGGCAGTGATGAGCAACGAGAGCGGACTGACTCTTACATTCGAACAGC  
CAACTGAAGCAAATGTCGATTGGCACTTAAAGATTAGAAAAAGCCTCTGAGGGTGCCTAGTGGTTACTTC  
TAGAGATGTTGAAGAACCATCCATGAAGGGTTCATGGCAAGAGGAGAGTTACAATTGGCCGGTCTGTCTGG  
AGACCAACCAGAGTCTTCTATACTCGGAACGAGGAAATAGAGTCATTAGAGCAATTCACATGGCAACGGCT  
AGTTCGTTAATTCGGAACAGATGAGTTCGATTGTGTACACGGGCCCATTAAGTTCAGCAAATGAAAACT  
TTATTGATAGCCTGGTAGCATCACTCTCTGCTGCGGTGTCGAACCTAGTCAAGATCCTAAAGGATACAGCTGCT  
ATAGATCTCGAAACCCGTCAGAAGTTTGGAGTCTTAGATGTTGCGACCAAAGATGGTTAATTAACCTTTAG  
CCAAAAATCACGCATGGGGCGTTATTGAAACACATGCTAGGAAGTACCACGTTGCACTTTTGGAGTATGATGA  
GCATGGAGTGGTAACTTGCGACAGTTGGAGAAGGGTGGCCGTGAGTCTGAGTCAATGGTTTATTCTGATAT  
GGCAAAGCTCAGAACACTGAGGAGATTATTAAGAGATGGTGAGCCTCATGTCAGCAGTGCTAAAGTCGTCCT  
AGTTGACGGTGTCCCGGGTGTGGAAAGACAAAAGAGATTCTCTCGAAAGTAAATTTGAGGAAGATCTAAT  
CTTAGTACCGGGTAAGCAGGCTGCTGAAATGATAAAGAGGCGTGCTAATGCGTCAGGAATAATTCAAGCCAC  
AAGAGATAATGTTCTGACTGTTGATTCAATTTATAATGAATTACGGTAAAGGAACACGCTGTCAAGTTCAAAGG  
TTATTTATCGACGAAGGTCTGATGTTGCACACTGGTTGTGTGAATTTCTTGTCTATGTCTGTGCGAAATT  
GCATATGTATATGGAGACACACAACAAATTCATACATCAACAGAGTATCCGTTTTCCGTACCCTGCACATTT  
TGCAAAAATAGAGGTTGATGAGGTGGAACTCGCAGAACTACGCTGCGTTGTCCAGCCGACATTACCCACTAT  
CTTAACAGAAGGTACGAAGGACATGTCATGTGTACATCGTCGGTTAAAAAGTCAGTTTCTCAGGAAATGGTGA  
GCGGGGCCGCAATGATCAATCCTGTATCTAAGCCATTGAATGGGAAAATTTTGACTTTCACTCAGTCCGATAA

AGAGGCGCTGCTTTCTCGAGGATATACGGACGTCCATACAGTACATGAGGTACAAGGTGAGACATATGCAGA  
TGTGTCGTTGGTCAGATTGACTCCGACACCTGTATCTATCATCGCAGGAGATAGTCCGCACGTTCTCGTAGCTT  
TGTCAAGGCATACCCAAACATTGAAGTATTACACCGTAGTGATGGATCCTCTTGTAAGTATAAATTAGGGATTTA  
GAAAACTTAGTTCTTACTTGTTAGATATGTATAAAGTAGATGCAGGGACCCAATAGCAATTACTGGTAGACT  
CCGTGTTTTAAAGGTTCTAATCTTTTTGTTGCAGCACCAAGACTGGAGATATCTCAGATATGCAATTTTACTAT  
GATAAGTGTCTCCAGGTAATAGCACCATGTTAAATAACTATGATGCTGTTACCATGAGGTTGACTGACATTTCT  
TCTTAATGTCAAAGATTGCATATTGGATTTCTCTAAGTCTGTGGCTGCACCGAAGGATCCGATCAAACCACTGA  
TTCCAATGGTACGAACGGCGGCAGAAATGCCACGCCAGACTGGACTATTGGAAAATTTGGTGGCAATGATCA  
AAAGAACTTTAATTCACCGGAGTTATCAGGAATAATCGACATTGAGAATACTGCATCTTTGGTAGTAGATAA  
ATTTTTGATAGTTACTTGCTTAAAGAAAAAGAAAAACCAAATAAAAAATGTTTCTTTATTTGTAGAGAGTCTCT  
CAATAGATGGTTAGAGAAGCAGGAGCAAGTGACCATTGGTCAGCTTGCAGATTTTGATTTTGTGGATCTTCCT  
GCCGTTGATCAGTACAGGCATATGATTAAAGCGCAACCTAAGCAGAAGCTGGATACATCAATTCAAAGCGAAT  
ATCCGGCCTTGACAGACGATTGTGTATCATTGAAAAAGATCAACGCAATCTTCGGTCCTTTGTTGAGTGAGCTC  
ACAAGGCAAATGCTCGAAAGCATAGACTCAAGTAAGTTTTTGTCTTTACAAGGAAGACGCCAGCTCAAATCG  
AGGATTTCTTCGGAGATCTCGATAGCCATGTCCCTATGGATATCTTGAGTTGGATATTTGGAAGTATGACAAA  
TCTCAGAACGAGTTCCACTGTGCAGTAGAGTATGAAATATGGAGAAGACTTGGATTAGAAGATTTTCTGGGA  
GAAGTTTGAAACAAGGCCACAGAAAACTACTCTTAAAGATTACACAGCTGGTATTAACCGTGTTTATGGT  
ACCAGAGAAAAGAGTGGGGACGTTACAACATTCATCGGTAATACGGTGATTATTGCTGCTTGTTTAGCTTCCAT  
GTTGCCCATGGAGAAAATAATCAAAGGTGCATTTTTCGGAGATGACAGTTTACTATACTTCCAAAAGGTTGT  
GAGTTTCCCGACATACAGCATACAGCTAACCTTATGTGGAATTTTCGAGGCTAAGCTATTCAGAAAGCAGTATG  
GTTATTTCTGTGGAAGGTACGTGATACATCATGACAGAGGGTGTATTGTTTATTACGACCTTTGAAGTTGATT  
TCTAACTTGGTGCTAAACACATCAAGGATTGGGATCACTTAGAAGAGTTCAGAAGATCCCTTTGTGATGTTG  
CAATTTCTGTTGAACAACTGTGCGTATTACACGCAGTTGGACGACGCTGTGAGTGAGGTCCATAAAACCGCACC  
CCCGGTTCTGTTTGTATAAAAGTTTAGTTAAATATCTGTCCGATAAGGTTCTTTTTAGAAAGTTTGTATAGA  
TGGCTCTTGTAAGGGTAAAGTCAATATTAATGAGTTCATAGACTTGTCAAAATCAGAAAAATTTTCCCGTCT  
ATGTTACACCTGTTAAGAGTGTGATCTCCAAGGTTGATAAGATATTGGTTCATGAAGATGAATCTTTGTC  
CGAAGTCAATTTACTCAAAGGTGTAAACTCATTAAATGGTGGCTATGTACATCTTGCTGGTCTTGATGACAG  
GTGAATGGAATTTGCCAGATAATTGTCGTGGTGGTGTGAGTGTCTGTTTGGTCGATAAGAGAATGGAGAGAG  
CGGACGAGGCAACTCTTGCTTCATACTATACCGCAGCGGCTAAGAAAAGGTTTCAGTTCAAAGTCGTTCCAAA  
TTACAACATCACTACCAAGGACGCAGAAAAGGCAGTTTGGCAAGTACTAGTTAATATTAGAAATGTTAAAT  
GCTGCGGGTTACTGTCCGCTGTCATTAGAATTTGTGTGAGTGTGATTGTTTATAAAAATATTATAAACTCGG  
TTTGAGAGAGAAAATTACGAGCGTCACGGAAGGAGGGCCCATGGAATATCAGAAGAAGTTGTTGATGAGTT  
CATGGAAGAAGTCCCGATGTCTGTAAGGCTTGCAAAATTCGTTTGAAGACCGGGAAAAAGTTTAGTAGTAA  
AAGTGAGAATAATAGTGGTAATAATAGGCCGAAACCAGACAAAAACCAAAGGAAGGAAAAGGGTTTAAAG  
TTAGGGTTGAGAAGGATAATTTAATTGATAATGAATTGGAGACTTACGTCGCCGATTGAGATTGATTAAT  
ATGTCTTACACAATCGCAACTCCATCGCAATTTGTGTTTTGTCATCAGCATGGGCCGACCCTATAGAATTAATA  
AATTTATGTAATAATTCACTAGGCAATCAGTTCCAAACACAACAAGCTAGAACAACCGTTCAACGGCAATTTAG  
CGAAGTGTGGAAACCTGTCCCTCAAGTCACTGTTAGGTTTCTGACAGTGGTTTAAAGGTGTATAGGTACAAT  
GCGGTACTAGATCCTCTAGTTACTGCTTTGTTGGGAGCTTTCGATACTAGAAATAGGATTATAGAAGTCGAAA  
ATCAGGCGAACCCGACAACCGCCGAAACGTTAGACGCTACTCGTAGAGTAGATGACGCAACGGTGGCTATAA  
GGAGCGCTATAAATAATTTAGTAGTAGAATTGGTCAAAGGAACAGGTTTGTACAATCAGAGCACATTTGAAA  
GTGCATCCGGTTTACAATGGTCCTCTGCACCTGCATCTTGA

#OM515269



ATGGCATACACACAGACAGCTACCACATCCGCTTTGCTCGACACTGTCCGAGGTAACAATACCTTGGTCAACG  
ATCTTGCGAAGCGGCGTCTTTATGACACAGCGGTGCGACGAGTTCAACGCTCGTGATCGCAGGCCCAAAGTAA  
ATTTTTCCAAAGTAATAAGTGAGGAACAGACGCTTATTGCTACTAGGGCATATCCAGAATTCCAGATAACCTTC  
TATAATACGCAGAACGCCGTGCATTGCTTGCCGGTGGACTACGATCCTTAGAACTGGAATATCTAATGATGC  
AGATCCCGTACGGATCACTCACATATGATATAGGTGGGAATTTTGCATCTCATCTGTTCAAAGGACGGGCATA  
TGTTCACTGCTGTATGCCCAATCTTGATGTCCGCGACATAATGCGGCACGAAGGCCAGAAAGACAGTATAGAA  
TTATACCTTTCCAGGCTTGAGCGGGGCAACAAAGTTGTCCCAAATTTCCAAAAGGAAGCTTTTGACAGATACG  
CTGAAACGCCAGACGAAGTTGTCTGTACAGTACCTTTCAAACGTGTACGCACCAGCAGGTGGAAAACACAG  
GCAGGGTGTATGCTATTGCATTGCACAGTATATACGATATACCTGCTGATGAATTCGGAGCGGCACTTTTAAG  
GAAAAATGTCCATGTTTGTACGCCGCCTTCCACTTTTCCGAGAATTTACTTCTCGAAGATTCACACGTCAACCT  
TGACGAAATCAACGCGTGTTTTTCGCGTGATGGAGACAAGCTGACTTTTTCTTTCGCATCTGAGAGCACTTTAA  
ATTATTGTCATAGTTATTCTAATATTTTAAAATACGTGTGCAGAAGTTACTTCCCGGCATCTAATAGAGAGGTCT  
ACATGAAGGAGTTTTTGGTCACCAGGGTTAACACCTGGTTTTGTAAGTTTTCTAGGATAGATACTTTTTTATTAT  
ACAAGGGGGTAGCCCAACAAAGGTGTAAATAGTGAGCAATTTTACAGCGCAATGGAAGATGCATGGCACTACA  
AAAAGACTCTTGCAATGTGTAAACAGCGAGAGGATTCTTCTGAAGATTCCTCATCGGTCAATTACTGGTCCCA  
AAAATGAGAGATATGGTCATAGTTCTCTATTGACATATCTCTCGACACCAGTAAAAGGACCCGCAAAGAAG  
TCTTAGTGTCAAAGGATTTTGTATTACAGTTTTTAAATCACATTCGCACCTTATCAAGCCAAGGCACTTACATACT  
CCAATGTTTTATCCTTTGTGCAATCAATTCGTTCAAGGGTAATTATCAACGGAGTGACTGCCAGGTCTGAGTGG  
GATGTTGACAAATCTTTTTGCAATCCTTGTCATGACATTTTTCTTGCACTAAGCTTGCCGTTTTAAAAGAC  
GAATTGTTAATCAGCAAGTTTAGTTGGGGCCAAAATCAGTAAGCCAGCATGTATGGGATGAGATTTCCCTGG  
CTTTTGAAACGCATTTCCATCGATCAAGGAGAGACTGCTAAATCGGAACTAATTAAGTGTCGGGAGACGC  
ATTAGAAATCAGGGTGCCTGATTTATATGTGACTTTTACGATAGATTAGTGACTGAGTACAAAACATCGGTG  
GATATGCCAGTGCTTGATATCAGAAAGAGAATGGAGGAGACTGAGGTTATGTACAATGCACTGTCTGAGCTA  
TCTGTGCTCAAGGAGTCGGACAAGTTGACGTTGATGTTTTTCCCGGATGTGCCAGACTTTGGAGGTAGACC  
CAATGACTGCAGCAAAGGTTATTGTGGCAGTGATGAGCAACGAGAGCGGACTGACTCTTACATTGCAACAGC  
CAACTGAAGCAAATGTCGATTGGCACTTAAAGATTGAGAAAAGCCTCTGAGGGTGCCTAGTGTTACTTC  
TAGAGATGTTGAAGAACCGTCCATGAAGGGTTCAATGGCAAGAGGAGAGTTACAATTGGCCGGTCTGTCTGG  
AGACCAACCAGAGTCTTCTATACTCGGAACGAGGAAATAGAGTCATTAGAGCAATTCACATGGCAACGGCT  
AGTTCGTTAATTCGGAAACAGATGAGTTCGATTGTGTACACGGGCCCATTAAGTTCAGCAAATGAAAACT  
TTATTGATAGCCTGGTAGCATCACTCTCTGCTGCGGTGTGCAACCTAGTCAAGATCCTAAAGGATACAGCTGCT  
ATAGATCTCGAAACCCGTCAGAAGTTTGGAGTCTTAGATGTTGCGACCAAAGATGGTTAATTAACCTTTAG  
CCAAGAATCACGCATGGGGCGTTATTGAAACACATGCTAGGAAGTACCACGTTGCACTTTTGGAGTATGATGA  
GCATGGAGTGGTAACTTGCGACAGTTGGAGAAGGGTGGCCGTGAGTTCTGAGTCAATGGTTTATTCTGATAT  
GGCAAAGCTCAGAACACTGAGGAGATTATTAAGGGATGGTGAGCCTCATGTCAGCAGTGCTAAAGTCGTCT  
AGTTGACGGTGTCCCGGGTTGTGGAAGACAAAAGAGATTCTCTCAAAGTAAATTTTGAGGAAGATCTAAT  
CTTAGTACCGGTAAGCAGGCTGCTGAAATGATAAAGAGGCGTGCTAATGCGTCAGGAATAATTCAAGCCAC  
AAGAGATAATGTTCTGACTGTTGATTCATTTATAATGAATTACGGTAAAGGAACACGCTGTCAGTTCAAAGG  
TTATTTATCGACGAAGGTCTGATGTTGCACACTGGTTGTGTGAATTTCTTGTTTCTATGTCTCTGTGCGAAATT  
GCATATGTTTATGGAGACACACAACAAATTCATACATCAACAGAGTATCCGGTTTTCCGTACCCTGCACATTT  
TGCAAAAATAGAGTTGATGAGGTGGAACTCGCAGAACTACGCTGCGTTGTCCAGCCGACATTACCCACTAT  
CTTAACAGAAGGTACGAAGGACATGTCATGTGTACATCGTCGGTTAAAAAGTCAGTTTCTCAGGAAATGGTGA  
GCGGGGCCGCAATGATCAATCCTGTATCTAAGCCACTGAATGGGAAAGTTTTGACTTTCACTCAGTCTGATAA  
AGAGGCGCTGCTTCTCGAGGATATACGGACGTCCATACAGTACATGAGGTACAAGGTGAGACATATGCAGA  
TGTGTGCTTGGTCAGATTGACTCCGACACCTGTATCTATCATCGCAGGAGATAGTCCGCACGTTCTCGTAGCTT  
TGTCAAGGCATACCCAAACATTGAAGTATTACACCGTAGTGATGGATCCTCTTGTAAGTATAATTAGGGATTTA  
GAAAACTTAGTTCTTACTTGTTAGATATGTATAAAGTAGATGCAGGGACCCAATAGCAATTACAGGTAGACT  
CCGTGTTTAAAGGTTCTAATCTTTTTGTTGCAGCACCAAGACTGGAGATATCTCAGATATGCAATTTTACTAT  
GATAAGTGCTCCCAGGTAATAGCACCATGTTAAATACTATGATGCTGTTACCATGAGGTTGACTGACATTC

TCTTAATGTCAAAGATTGCATATTGGATTTCTCTAAGTCTGTGGCTGCACCGAAGGATCCGATCAAACCACTGA  
TTCCAATGGTACGAACGGCGGCAGAAATGCCACGCCAGACTGGACTATTGGAAAATTTGGTGGCGATGATCA  
AAAGAACTTTAATTCACCGGAGTTATCAGGAATAATCGACATTGAGAATACTGCATCTTTAGTAGTAGATAA  
ATTTTTGATAGTTACTTGCTTAAAGAAAAAGAAAACCAAATAAAAAATGTTTCTTTATTTAGTAGAGAGTCTC  
TCAATAGATGGTTAGAGAAGCAGGAGCAAGTGACCATTGGTCAGCTTGCAGATTTTGATTTTGTGGATCTTCC  
TGCCGTTGATCAGTACAGGCATATGATTAAAGCGCAACCTAAGCAGAAGCTGGATACATCAATTCAAAGCGAA  
TATCCGGCCTTGCAGACGATTGTGTATCATTGAAAAAGATCAACGCAATCTTCGGTCCTTTGTTGAGTGAGCT  
CACAAGGCAAATGCTCGAAAGCATAGACTCAAGTAAGTTTTTGTCTTTACAAGGAAGACGCCAGCTCAAATT  
GAGGATTTCTTCGGAGATCTCGATAGCCATGTCCCTATGGATATCTTGGAGTTGGATATTTGGAAGTATGACA  
AATCTCAGAACGAGTTCCACTGTGCAGTAGAGTATGAAATATGGAGAAGACTTGGATTAGAAGATTTTCTGG  
GAGAAGTTTGGAAACAAGGCCACAGGAAACTACTCTTAAAGATTACACAGCTGGTATTAACGTTGTTTATG  
GTACCAGAGAAAGAGTGGGGACGTTACAACATTCATCGGTAATACGGTGATTATTGCTGCTTGTGTTAGCTTCC  
ATGTTGCCCATGGAGAAAATAATCAAAGGTGCATTTTGGGAGATGACAGTTTACTATACTTCCCAAAGGTT  
GTGAGTTTCTGACATACAGCATACAGCCAACCTTATGTGGAATTTGAGGCTAAGCTATTCAGAAAGCAGTA  
TGTTATTTCTGTGGAAGGTACGTGATACATCATGACAGAGGGTGTATTGTTTATTATGACCTTTGAAGTTGA  
TTTCTAACTTGGTGCTAAACACATCAAGGATTGGGATCACTTAGAAGAGTTCAGAAGATCCCTTGTGATGTT  
GCAAATTCGTTGAACAACTGTGCGTATTACACGCAGTTGGACGACGCTGTGAGTGAGGTCCATAAAACCGCAC  
CCCCGGGTTGTTTGTGTATAAAAGTTTAGTTAAATATCTGTCCGATAAGGTTCTTTTGAAGTTTGTGTTATAG  
ATGGCTCTTGTTAAGGGTAAAGTCAATATTAATGAGTTCATAGACTTGTCAAAATCAGAAAAATTTCTTCCGTC  
TATGTTACACCTGTTAAGAGTGTCTGATCTCAAGGTTGATAAGATATTGGTTCATGAAGATGAATCTTTGT  
CCGAAGTCAATTTACTCAAAGGTGTAAACTCATTGATGGTGGCTATGTACATCTTGCTGGTCTTGTTGGTGACA  
GGTGAATGGAATTTGCCAGATAATTGTCGTGGTGGTGTGAGTGTCTGTTTGGTCGATAAGAGAATGGAGAGA  
GCGGACGAGGCAACTCTTGCTTCACTATACCGCAGCGGCTAAGAAAAGGTTTCAGTTCAAAGTCGTTCCAA  
ATTACAACATCACTACCAAGGACGCAGAAAAGGCAGTTTGGCAAGTACTAGTTAATATTAGAAATGTTAAAT  
TGCTGCGGGTACTGTCCGCTGTCATTAGAATTTGTGTGAGTGTGATTGTTTATAAAAAATATTATAAACTCG  
GTTTGAGAGAGAAAATTACGAGCGTCACGGATGGAGGGCCCATGGAATATCAGAAGAAGTTGTTGATGAG  
TTCATTGAAGAAGTCCCGATGTCTGTGAGGCTTGCAAAATTTGTTTGAAGACCGGAAAAAGTTTAGTAGTA  
AAAGTGAGAATAATAGTGGTAATAATAGGCCGAAACCAAACAAAAACCAAAGGAAGGAAAAGGGTTAAAA  
GTTAGGGTTGAGAAGGATAATTTAATTGATAATGAATTGGAGACTTACATCGCCGATTGAGATTCGTATTA  
TATGTCTTACACAATCGCAACTCCATCGCAATTTGTGTTTTTGTATCAGCATGGGCCGACCCTATAGAATTA  
AAATTTATGTACTAATTCAGTAAATCAGTTCCAAACACAACAAGCTAGAACAACCGTTCAACGGCAATTTA  
GCGAAGTGTGGAACCTGTCCCTCAAGTCACTGTTAGGTTTCTGACAGTGGTTTTAAGGTGTATAGGTACAA  
TGCGGTACTAGATCCTCTAGTTACTGCTTTGTTAGGAGCTTCGATACTAGAAATAGGATTATAGAAGTCGAAA  
ATCAGGCGAACCCGACAACCGCCGAAACGTTAGACGCTACTCGTAGAGTAGATGACGCAACGGTGGCTATAA  
GGAGCGCTATAATAATTTAGTAGTAGAATTGGTCAAAGGAACAGGTTTGTACAATCAGAGCACATTTGAAA  
GTGCATCCGGTTTACAATGGTCCTCTGCACCTGCATCTTGA

#OM515270

1

ATGGCATACACACAGACAGCTACCACATCCGCTTTGCTCGACACTGTCCGAGGTAACAATACCTTGGTCAACG  
ATCTTGCGAAGCGGCGTCTTTATGATACAGCGGTGCGACGAGTTCAACGCTCGTGATCGCAGGCCCAAAGTAA  
TTTTTCAAAGTAATAAGTGAGGAACAGACGCTTATTGCTACTAGGGCATATCCTGAATTCAGATAACCTTCT  
ATAATACGCAGAACGCCGTGCATTGCTTGCCGGTGGACTACGATCCTTAGAACTGGAATATCTAATGATGCA  
GATCCCGTACGGATCACTCACATATGATATAGGTGGGAATTTGTCATCTCATCTGTTCAAAGGACGGGCATAT

GTTCACTGCTGTATGCCCAATCTTGATGTCCGCGACATAATGCGGCACGAAGGCCAGAAAGACAGTATAGAAT  
TATACCTTTCCAGGCTTGAGCGGGGCAACAAAGTTGTCCCAAATTTCCAAAAGGAAGCTTTTGACAGATACGC  
TGAAACGCCAGACGAAGTTGTCTGTACAGTACCTTCCAAACGTGTACACACCAGCAGGTGGAAAACACAGG  
CAGGGTGTATGCTATTGCATTGCACAGTATATACGATATACCTGCTGATGAATTCGGAGCGGCACTTTTAAGG  
AAAAATGTCCATGTTTGTTACGCCGCCTTCCACTTTTCCGAGAATTTACTTCTCGAAGATTCACACGTCAACCTT  
GACGAAATCAACGCGTGTTTTTCGCGTGATGGAGACAAGCTGACTTTTTCTTCGCATCTGAGAGCACTTTAA  
TTATTGTCATAGTTATTCTAATATTTTAAAATACGTGTGCAAAACTTACTTCCCGGCATCTAATAGAGAGGTCTA  
CATGAAGGAGTTTTTGGTCACCAGGGTTAACACCTGGTTTTGTAAGTTTTCTAGGATAGATACTTTTTTATTATA  
CAAGGGGGTAGCCCAAAAGGTGTAAATAGTGAGCAATTTTACAGCGCAATGGAAGATGCATGGCACTACAA  
AAAGACTCTTGCAATGTGTAACAGCGAGAGGATTCTTCTTGAAGATTCCTCATCGGTCAATTACTGGTTCCCAA  
AAATGAGAGATATGGTCATAGTTCCTCTATTCGACATATCTCTCGACACTAGTAAAAGGACCCGCAAAGAAGT  
CTTAGTGTCAAAGGATTTTGTATTACAGTTTTTAAATCACATTTCGCACTTATCAAGCCAAGGCACTTACATACTC  
CAATGTTTTATCCTTTGTCGAATCAATTCGTTCAAGGGTAATTATCAACGGAGTGACTGCCAGGTCTGAGTGG  
GATGTTGACAAATCTTTTTGCAATCCTTGTCATGACATTTTTCTTGCTACTAAGCTTGCCGTTTTAAAAGAC  
GAATTGTTAATCAGCAAGTTTAGTTTGGGGCCAAAATCAGTAAGCCAGCATGTATGGGATGAGATTTCCCTGG  
CTTTTGAAACGCATTTCCATCGATCAAGGAGAGACTGCTAAATCGGAACTAATTAAGTGTGCGGAGACGC  
ATTAGAAATCAGGGTGCCTGATTTATATGTGACTTTTACGATAGATTAGTGACTGAGTACAAAACATCGGTG  
GATATGCCAGTGCTTGATATCAGAAAGAGAATGGAGGAGACTGAGGTTATGTACAATGCATTGTCTGAGCTA  
TCTGTGCTCAAGGAGTCGGACAAGTTTCGACGTTGATGTTTTTCCCGGATGTGCCAGACTTTGGAGGTAGACC  
CAATGACTGCAGCAAAGGTTATTGTGGCAGTGATGAGCAACGAGAGCGGACTGACTCTTACATTGCAACAGC  
CAACTGAAGCAAATGTCGATTGGCACTTAAAGATTGAGAAAAAGCCTCTGAGGGTGCCTAGTGTTACTTC  
TAGAGATGTTGAAGAACCATCCATGAAGGGTTCATGGCAAGAGGAGAGTTACAATTGGCCGGTCTGTCTGG  
AGACCAACCAGAGTCTTCTATACTCGGAACGAGGAAATAGAGTCATTAGAGCAATTTACATGGCAACGGCT  
GGTTCGTTAATTCGGAACAGATGAGTTCGATTGTGTACACGGGCCCATTAAGTTTCAGCAAATGAAAACT  
TTATTGATAGCCTGGTAGCATCACTCTCTGCTGCGGTGTGCAACCTAGTCAAGATCCTAAAGGATACAGCTGCT  
ATAGATCTCGAAACCCGTCAGAAGTTTGGAGTCTTAGATGTTGCGACCAAAGATGGTTAATTAACCTTTAG  
CCAAGAATCACGCATGGGGCGTTATTGAAACACATGCTAGGAAGTACCACGTTGCACTTTTGGAGTATGATGA  
GCATGGAGTGGTAACTAGCGACAGTTGGAGAAGGGTGGCCGTGAGTCTGAGTCAATGGTTTATTCTGATAT  
GGCAAAGCTCAGAACTGAGGAGATTATTAAGAGATGGTGAGCCTCATGTCAGCAGTGCTAAAGTCGTCT  
AGTTGACGGTGTCCCGGGTTGTGGAAGACAAAAGAGATTCTCTCGAAAGTAAATTTGAGGAAGATCTAAT  
CTTAGTACCGGTAAGCAGGCTGCTGAAATGATAAAGAGGCGTGCTAATGCGTCAGGAATAATTCAAGCCAC  
AAGAGATAATGTTCTGACTGTTGATTCAATTTATAATGAATTACGGTAAAGGAACACGCTGTCAGTTCAAAGG  
TTATTTATCGACGAAGGTCTGATGTTGCACACTGGTTGTGTGAATTTCTTGTTTCAATGTCTCTGTGCGAAAT  
GCATATGTTTATGGAGACACACAACAAATTCATACATCAACAGAGTATCCGTTTTCCGTACCCTGCACATTT  
TGCAAAAATAGAGTTGATGAGGTGGAAGTCTCGAGAACTACGCTGCGTTGTCCAGCCGACATTACCACTAT  
CTTAACAGAAGGTACGAAGGACATGTCATGTGTACATCGTCGGTTAAAAAGTCAGTTTCTCAGGAAATGGTGA  
GCGGGGCCGCAATGATCAATCCTGTATCTAAGCCATTGAATGGGAAAGTTTTGACTTTCACTCAGTCTGATAA  
AGAGGCGTGCTTTCTCGAGGATATACGGACGTCCATACAGTACATGAGGTACAAGGTGAGACATATGCAGA  
TGTGTGCTTGGTCAGATTGACTCCGACACCTGTATCTATCATCGCAGGAGATAGTCCGCACGTTCTCGTAGCTT  
TGTCAAGGCATACCCAAACATTGAAGTATTACACCGTAGTGATGGATCCTCTTGTAAGTATAATTAGGGATTTA  
GAAAACTTAGTTCTTACTTGTTAGATATGTATAAAGTAGATGCAGGGACCCAATAGCAATTACAGGTAGACT  
CCGTGTTTAAAGGTTCTAATCTTTTTGTTGCAGCACCAAGACTGGAGATATCTCAGATATGCAATTTTACTAT  
GATAAGTGCTCCCAGGTAATAGCACCATGTTAAATAACTATGATGCTGTTACCATGAGGTTGACTGACATTT  
TCTTAATGTCAAAGATTGCATATTGGATTTCTCTAAGTCTGTGGCTGCACCGAAGGATCCGATCAAACCACTGA  
TTCCAATGGTACGAACGGCGGCAGAAATGCCACGCCAGACTGGACTATTGGAAAATTTGGTGGCGATGATCA  
AAAGAACTTTAATTCACCGGAGTTATCAGGAATAATCGACATTGAGAATACTGCATCTTTAGTAGTAGATAA  
ATTTTTGATAGTTACTTGCTTAAAGAAAAAAGAAAAACCAATAAAAAATGTTTCTTTATTTGTAGAGAGTCTCT  
CAATAGATGGTTAGAGAAGCAGGAGCAAGTGACCATTGGTCAGCTTGCAATTTTGATTTTGTGGATCTTCTCT

GCCGTTGATCAGTACAGGCATATGATTAAAGCGCAACCTAAGCAGAAGCTGGATACATCAATTCAAAGCGAAT  
ATCCGGCCTTGACAGACGATTGTGTATCATTGAAAAAGATCAACGCAATCTTCGGTCCTTTGTTTCAGTGAGCTC  
ACAAGGCAAATGCTCGAAAGCATAGACTCAAGTAAGTTTTTGTCTTTACAAGGAAGACGCCAGCTCAAATTG  
AGGATTTCTTCGGAGATCTCGATAGCCATGTCCCTATGGATATCTTGGAGTTGGATATTTGCAAGTATGACAAA  
TCTCAGAACGAGTTCCACTGTGCAGTAGAGTATGAAATATGGAGAAGACTTGGATTAGAAGATTTTCTGGGA  
GAAGTTTGAAACAAGGCCACAGAAAACTACTCTTAAAGATTACACAGCTGGTATTAACGTTGTTTATGGT  
ACCAGAGAAAGAGTGGGGACGTTACAACATTCATCGGTAATACGGTGATTATTGCTGCTTGTGTTAGCTTCCAT  
GTTACCCATGGAGAAAATAATCAAAGGTGCATTTTGCGGAGATGACAGTTTACTATACTTCCCAAAGGTTGT  
GAGTTTCTGACATACAGCATACAGCCAACCTTATGTGGAATTTGAGGCTAAGCTATTCAGAAAGCAGTATG  
GTTATTTCTGTGGAAGGTACGTGATACATCATGACAGAGGGTGTATTGTTTATTATGACCTTTGAAGTTGATT  
TCTAACTTGGTGCTAAACACATCAAGGATTGGGATCACTTAGAAGAGTTCAGAAGATCCCTTTGTGATGTTG  
CAAATTCGTTGAACAACTGTGCGTATTACACGCAGTTGGACGACGCTGTGAGTGAGGTCCATAAAACCGCACC  
CCCGGGTTCGTTTGTATATAAAAGTTAGTTAAATATCTGTCCGATAAGGTTCTTTTAGAAGTTTGTGTTATAGA  
TGGCTCTTGTTAAGGGTAAAGTCAATATTAGTGAGTTCATAGACTTGTCAAAATCAGAAAAATTTCTCCCGTCT  
ATGTTACACCTGTTAAGAGTGTGATGATCTCCAAGGTTGATAAGATATTGGTTCATGAAGATGAATCTTTGTC  
CGAAGTCAATTTACTCAAAGGTGTAACCTCATTGATGGTGGCTATGTACATCTTGCTGGTCTTGTTGGTGACA  
GGTGAATGGAATTTGCCAGATAATTGTCGTGGTGGTGTGAGTGTCTGTTTGGTCGATAAAAGAATGGAGAGA  
GCGGACGAGGCAACTCTTGCTTCATACTATACCGCAGCGGCTAAGAAAAGGTTTCAGTTCAAAGTCGTTCCAA  
ATTACAACATCACTACCAAGGACGCAGAAAAGGCAGTTTGGCAAGTACTAGTTAATATTAGAAATGTTAAAT  
TGCTGCGGGTACTGTCCGCTGTCATTAGAATTTGTGTGAGTGTGATTGTTTATAAAAATATTATAAACTCG  
GTTTGAGAGAGAAAATTACGAGCGTCACGGATGGAGGGCCCATGGAATATCAGAAGAAGTTGTTGATGAG  
TTCATGGAACAAGTCCCGATGTCTGTAAGGCTTGCAAAATTTGTTTGAAGACCGGGAAAAAGTTTAGTAGTA  
AAAGTGAGAATAATAGTGGTAATAATAGGCCGAAACCAAACAAAAACCAAAGGAAGGAAAAGGGTTTAAAA  
GTTAGGGTTGAGAAGGATAATTTAATTGATAATGAATTGGAGACTTACGTCGCCGATTGAGATTCGTATTTAA  
TATGTCTTACACAATCGCAACTCCATCGCAATTTGTGTTTTTGTGTCAGCATGGGCCGACCCTATAGAATTAAT  
AAATTTATGTACTAATTCAGTAAATCAATTCAAACACAACAAGCTAGAACAAACGTTCAACGGCAATTTA  
GCGAAGTGTGGAACCTGTCCCTCAAGTCACTGTTAGGTTTCTGACAGTGGTTTTAAGGTGTATAGGTACAA  
TGCGGTACTAGATCCTCTAGTTACTGCTTTGTTAGGAGCTTTCGATACTAGAAATAGGATTATAGAAGTCGAAA  
ATCAGGCGAACCCGACAACCGCCGAAACGTTAGACGCTACTCGTAGAGTAGATGACGCAACGGTGGCTATAA  
GGAGCGCTATAAATAATTTAGTAGTAGAATTGGTCAAAGGAACAGGTTTGTACAATCAGAGCACATTTGAAA  
GTGCATCCGGTTTACAATGGTCCTCTGCACCTGCATCTTGA

#OM515272

1

ATGGCATACACACAGACAGCTACCACATCCGCTTTGCTCGACACTGTCCGAGGTAACAATACCTTGGTCAACG  
ATCTTGCGAAGCGGCGTCTTTATGACACAGCGGTGCGAGGTTCAACGCTCGTGATCGCAGGCCCAAAGTAA  
ATTTTTCAAAGTAATAAGTGAGGAACAGACGCTTATTGCTACTAGGGCATATCCAGAATTCCAGATAACCTTC  
TATAATACGCAGAACGCCGTGCATTGCTTGCCGGTGGACTACGATCCTTAGAACTGGAATATCTAATGATGC  
AGATCCCGTACGGATCACTCACATATGATATAGGTGGGAATTTTGCATCTCATCTGTTCAAAGGACGGGCATA  
TGTTCACTGCTGTATGCCAATCTTGATGTCCGCGACATAATGCGGCACGAAGGCCAGAAAGACAGTATAGAA  
TTATACCTTTCCAGGCTTGAGCGGGGCAACAAAGTTGTCCCAAATTTCCAAAAGGAAGCTTTTACAGATACG  
CTGAAACGCCAGACGAAATTGTCTGTACAGTACCTTCAAACGTGTACGCACCAGCAGGTGGAACACAG  
GCAGGGTGTATGCTATTGCATTGCACAGTATATACGATATACCTGCTGATGAATTCGGAGCGGCACTTTTAAG  
GAAAAATGTCCATGTTTGTACGCCGCTTCCACTTTTCCGAGAATTTACTTCTCGAAGATTCACACGTCAACCT

TGACGAAATCAACGCGTGTTCGCGTGATGGAGACAAGCTGACTTTTCTTCGCATCTGAGAGCACTTTAA  
ATTATTGTCATAGTTATTCTAATATTTTAAAATACGTGTGCAGAACTTACTTCCCGGCATCTAATAGAGAGGTCT  
ACATGAAGGAGTTTTTGGTCACCAGGGTTAACACCTGGTTTTGTAAGTTTTCTAGGATAGATACTTTTTATTAT  
ACAAGGGGGTAGCCCAAAAGGTGTAAATAGTGAGCAATTTTACAGCGCAATGGAAGATGCATGGCACTACA  
AAAAGACTCTTGCAATGTGTAAACAGCGAGAGGATTATTCTTGAAGATTCCTCATCGGTCAATTACTGGTTCCCA  
AAAATGAGAGATATGGTCATAGTTCCTCTATTGACATATCTCTCGACACCAGTAAAAGGACCCGCAAAGAAG  
TCTTAGTGCAAAGGATTTTGTATTACAGTTTTTAAATCACATTGCACTTATCAAGCCAAGGCACTTACATACT  
CCAATGTTTTATCCTTTGTGCAATCAATTCGTTCAAGGGTAATTATCAACGGAGTGACTGCCAGGTCTGAGTGG  
GATGTTGACAAATCTCTTTTGAATCCTTGTCCATGACATTTTCTTGCATACTAAGCTTGCCGTTTTAAAAGAC  
GAATTGTTAATCAGCAAGTTTAGTTTGGGGCCAAAATCAGTAAGCCAGCATGTATGGGATGAGATTTCCCTGG  
CTTTTGGAAACGCATTTCCATCGATCAAGGAGAGACTGCTAAATCGGAACTAATTAAAGTGTCGGGAGACGC  
ATTAGAAATCAGGGTGCCTGATTTATATGTGACTTTTACGATAGATTAGTGACTGAGTACAAAACATCGGTG  
GATATGCCAGTGCTTGATATCAGAAAGAGAATGGAGGAGACTGAGGTTATGTACAATGCATTGTCTGAGCTA  
TCTGTGCTCAAGGAGTCGGACAAGTTGACGTTGATGTTTTTCCCGGATGTGCCAGACTTTGGAGGTAGACC  
CAATGACTGCAGCAAAGGTTATTGTGGCAGTGATGAGCAACGAGAGCGGACTGACTCTTACATTGCAACAGC  
CAACTGAAGCAAATGTCGATTGGCACTTAAAGATTGAGAAAAAGCCTCTGAGGGTGCCTAGTGTTACTTC  
TAGAGATGTTGAAGAACCGTCCATGAAGGGTTCAATGGCAAGAGGAGAGTTACAATTGGCCGGTCTGTCTGG  
AGACCAACCAGAGTCTTCTATACTCGGAACGAGGAAATAGAGTCATTAGAGCAATTCCACATGGCAACGGCT  
AGTTCGTTAATTCGGAAACAGATGAGTTCGATTGTGTACACGGGCCCATTAAGTTTCAGCAAATGAAAACT  
TTATTGATAGCCTGGTAGCATCACTCTCTGCTGCGGTGTGCAACCTAGTCAAGATCCTAAAGGATACAGCTGCT  
ATAGATCTCGAAACCCGTCAGAAGTTTGGAGTCTTAGATGTTGCGACCAAAGATGGTTAATTAAACCTTTAG  
CCAAGAATCACGCATGGGGCGTTATTGAAACACATGCTAGGAAGTACCACGTTGCACTTTTGGAGTATGATGA  
GCATGGAGTGGTAACTTGCGACAGTTGGAGAAGGGTGGCCGTGAGTTCTGAGTCAATGGTTTATTCTGATAT  
GGCAAAGCTCAGAACTGAGGAGATTATTAAGGGATGGTGAGCCTCATGTGAGTAGTGCTAAAGTCGTCTCT  
AGTTGACGGTGTCCCGGGTTGTGAAAGACAAAAGAGATTCTCTCAAAGTAAATTTTGGAGGAAGATCTAAT  
CTTAGTACCGGGTAAGCAGGCTGCTGAAATGATAAAGAGGCGTGCTAATGCGTCAGGAATAATTCAAGCCAC  
AAGAGATAATGTTCTGACTGTTGATTCAATTATAATGAATTACGGTAAAGGAACACGCTGTGAGTTCAAAGG  
TTATTTATCGACGAAGGTCTGATGTTGCACACTGGTTGTGTGAATTTCTTGTCTATGTCTCTGTGCGAAATT  
GCATATGTTTATGGAGACACACAACAAATTCCATACATCAACAGAGTATCCGGTTTTCCGTACCCTGCACATTT  
TGCAAAAATAGAGTTGATGAGGTGGAAGTCTGCGAGAACTACGCTGCGTTGTCCAGCCGACATTACCCACTAT  
CTTAACAGAAGGTACGAAGGACATGTCATGTGTACATCGTCGGTTAAAAAGTCAGTTTCTCAGGAAATGGTGA  
GCGGGGCCGCAATGATCAATCCTGTATCTAAGCCACTGAATGGGAAAGTTTTGACTTTCACTCAGTCTGATAA  
AGAGGCGCTGCTTCTCGAGGATATACGGACGTCCATACAGTACATGAGGTACAAGGTGAGACATATGCAGA  
TGTGTGCTTGGTTCAGATTGACTCCGACACCTGTATCTATCATCGCAGGAGATAGTCCGCACGTTCTCGTAGCTT  
TGTCAAGGCATACCCAAACATTGAAGTATTACCCGTAGTGATGGATCCTCTTGTAAGTATAATTAGGGATTTA  
GAAAACTTAGTTCTTACTTGTTAGATATGTATAAAGTAGATGCAGGGACCCAATAGCAATTACAGGTAGACT  
CCGTGTTTAAAGGTTCTAATCTTTTTGTTGCAGCACCAAGACTGGAGATATCTCAGATATGCAATTTTACTAT  
GATAAGTGCTCCCAGGTAATAGCACCATGTTAAATAACTATGATGCTGTTACCATGAGGTTGACTGACATTTT  
TCTTAATGTCAAAGATTGCATATTGGATTTCTCTAAGTCTGTGGCTGCACCGAAGGATCCGATCAAACCACTGA  
TTCCAATGGTACGAACGGCGGCAGAAATGCCACGCCAGACTGGACTATTGGAAAATTTGGTGGCGATGATCA  
AAAGAACTTTAATTCACCGGAGTTATCAGGAATAATCGACATTGAGAATACTGCATCTTTAGTAGTAGATAA  
ATTTTTGATAGTTACTTGCTTAAAGAAAAAAGAAAAACCAATAAAAAATGTTTCTTTATTTAGTAGAGAGTCTC  
TTAATAGATGGTTAGAGAAGCAGGAGCAAGTGACCATTGGTCAGCTTGAGATTTTGATTTTGTGGATCTTCC  
TGCCGTTGATCAGTACAGGCATATGATTAAAGCGCAACCTAAGCAGAAGTTGGATACATCAATTCAAAGCGAA  
TATCCGGCCTTGAGACGATTGTGTATCATTCGAAAAAGATCAACGCAATCTTCGGTCTTTGTTCAGTGAGCT  
CACAAGGCAAATGCTCGAAAGCATAGACTCAAGTAAGTTTTGTTCTTTACAAGGAAGACGCCAGCTCAAATT  
GAGGATTTCTTCGGAGATCTCGATAGCCATGTCCCTATGGATATCTTGGAGTTGGATATTTGGAAGTATGACA  
AATCTCAGAACGAGTTCCTGTGAGTAGAGTATGAAATATGGAGAAGACTTGGATTAGAAGATTTTCTGG

GAGAAGTTTGGAAACAAGGCCACAGGAAACTACTCTTAAAGATTACACAGCTGGTATTAAAACGTGTTTATG  
GTACCAGAGAAAGAGTGGGGACGTTACAACATTCATCGGTAATACGGTGATTATTGCTGCTTGTAGCTTCC  
ATGTTGCCCATGGAGAAAATAATCAAAGGTGCATTTTGGGAGATGACAGTTTACTATACTTCCCAAAGGTT  
GTGAGTTTCTGACATACAGCATACAGCCAACCTTATGTGGAATTTGAGGCTAAGCTATTCAGAAAGCAGTA  
TGTTATTTCTGTGGAAGGTACGTGATACATCATGACAGAGGGTGTATTGTTTATTATGACCTTTGAAGTTGA  
TTTCTAAACTTGGTGCTAAACACATCAAGGATTGGGATCACTTAGAAGAGTTCAGAAGATCCCTTTGTGATGTT  
GCAAATTCGTTGAACAACTGTGCGTATTACACGCAGTTGGACGACGCTGTGAGTGAGGTCCATAAAACCGCAC  
CCCCGGGTTGTTTTGTGTATAAAAGTTTAGTTAAATATCTGTCCGATAAGGTTCTTTTAGAAGTTTGTATTAG  
ATGGCTCTTGTTAAGGGTAAAGTCAATATTAATGAGTTCATAGACTTGTCAAAATCAGAAAAATTTCTCCGTC  
TATGTTACACCTGTTAAGAGTGTCTATGATCTCCAAGTTGATAAGATATTGGTTCATGAAGATGAATCTTTGT  
CCGAAGTCAATTTACTCAAAGGTGTAAACTCATTGATGGTGGCTATGTACATCTTGCTGGTCTTGTTGGTGACA  
GGTGAATGGAATTTGCCAGATAATTGTCGTGGTGGTGTGAGTGTCTGTTTGGTCGATAAGAGAATGGAGAGA  
GCGGACGAGGCAACTCTTGCTTCATACTATACCGCAGCGGCTAAGAAAAGGTTTCAGTTCAAAGTCGTTCCAA  
ATTACAACATCACTACCAAGGACGCAGAAAAGGCAGTTTGGCAAGTACTAGTTAATATTAGAAATGTTAAAT  
TGCTGCGGGTACTGTCCGCTGTCATTAGAATTTGTGTGAGTGTGATTGTTTATAAAAATATTATAAACTCG  
GTTTGAGAGAGAAAATTACGAGCGTCACGGATGGAGGGCCCATGGAATATCAGAAGAAGTTGTTGATGAG  
TTCATTGAAGAAGTCCCGATGTCTGTAAGGCTTGCAAGATTTGTTTGAAGACCGGAAAAAGTTTAGTAGTA  
AAAGTGAGAATAATAGTGGTAATAATAGGCCGAAACCAAACAAAAACCAAAGGAAGGAAAAGGGTTTAAAA  
GTTAGGGTTGAGAAGGATAATTTAATTGATAATGAATTGGAGACTTACATCGCCGATTGAGATTCGTATTA  
TATGTCTTACACAATCGCAACTCCATCGCAATTTGTGTTTTTGTGTCAGCATGGGCCGACCCTATAGAATTA  
AAATTTATGTACTAATTCAGTGGTAATCAGTTCCAAACACAACAAGCTAGAACAACCGTTCAACGGCAATTTA  
GCGAAGTGTGGAAACCTGTCCCTCAAGTCACTGTTAGGTTTCTGACAGTGGTTTTAAGGTGTATAGGTACAA  
TGCGGTACTAGATCCTCTAGTTACTGCTTTGTTAGGAGCTTCGATACTAGAAATAGGATTATAGAAGTCGAAA  
ATCAGGCGAACCCGACAACCGCCGAAACGTTAGACGCTACTCGTAGAGTAGATGACGCAACGGTGGCTATAA  
GGAGCGCTATAAATAATTTAGTAGTAGAATTGGTCAAAGGAACAGGTTGTACAATCAGAGCACATTTGAAA  
GTGCATCCGGTTTACAATGGTCCTCTGCACCTGCATCTTGA

#OM718704

1

ATGGCATACACACAGACAGCTACCACATCCGCTTTGCTCGACACTGTCCGAGGTAACAATACCTTGGTCAACG  
ATCTTGCGAAGCGGCGTCTTTATGACACAGCGGTGCGAGGTTCAACGCTCGTGATCGCAGGCCCAAAGTAA  
ATTTTTCAAAGTAATAAGTGAGGAACAGACGCTTATTGCTACTAGGGCATATCCAGAATTCCAGATAACCTTC  
TATAATACGCAGAACGCCGTGCATTGCTTGGCGGTGGACTACGATCCTTAGAACTGGAATATCTAATGATGC  
AGATCCCGTACGGATCACTCACATATGATATAGGTGGGAATTTTGCATCTCATCTGTTCAAAGGACGGGCATA  
TGTTCACTGCTGTATGCCAATCTTGATGTCCGCGACATAATGCGGCACGAAGGCCAGAAAGACAGTATAGAA  
TTATACCTTTCCAGGCTTGAGCGGGGCAACAAAGTTGTCCCAAATTTCCAAAAGGAAGCTTTTGACAGATACG  
CTGAAACGCCAGACGAAGTTGTCTGTACAGTACCTTCCAAACGTGTACGCACCAGCAGGTGGAAAACACAG  
GCAGGGTGTATGCTATTGCATTGCACAGTATATACGATATACCTGCTGATGAATTCGGAGCGGCACTTTTAAG  
GAAAAATGTCCATGTTTGTACGCCGCTTCCACTTTTCCGAGAATTTACTTCTCGAAGATTCACACGTCAACCT  
TGACGAAATCAACGCGTGTTCGCGTGATGGAGACAAGCTGACTTTTCTTCGCATCTGAGAGCACTTTTAA  
ATTATTGTCATAGTTATTCTAATATTTTAAAATACGTGTGCAGAACTTACTTCCCGGCATCTAATAGAGAGGTCT  
ACATGAAGGAGTTTTTGGTCACCAGGGTTAACACCTGGTTTTGTAAGTTTTCTAGGATAGATACTTTTTATTAT  
ACAAGGGGGTAGCCCAAAAGGTGTAGATAGTGAGCAATTTTACAGCGCAATGGAAGATGCATGGCACTACA  
AAAAGACTCTTGCAATGTGTAACAGCGAGAGGATTATTCTTGAAGATTCCTCATCGGTCAATTAAGTTCCCA

AAAATGAGAGATATGGTCATAGTTCCTCTATTTCGACATATCTCTCGACACCAGTAAAAGGACCCGCAAAGAAG  
TCTTAGTGTCAAAGGATTTTGTATTACAGTTTTAAATCACATTCGCACTTATCAAGCCAAGGCATTACATACT  
CCAATGTTTTATCCTTTGTGAATCAATTCGTTCAAGGGTAATTATCAACGGAGTGACTGCCAGGTCTGAGTGG  
GATGTTGACAAATCTCTTTTGAATCCTTGTCCATGACATTTTCTTGCACTAAGCTTGCCGTTTTAAAAGAC  
GAATTGTTAATCAGCAAGTTTAGTTTGGGGCCAAAATCAGTAAGCCAGCATGTATGGGATGAGATTTCCCTGG  
CTTTTGAAACGCATTTCCATCGATCAAGGAGAGACTGCTAAATCGGAAACTAATTAAAGTGTGCGGAGACGC  
ATTAGAAATCAGGGTGCCTGATTTATATGTGACTTTTCACGATAGATTAGTGACTGAGTACAAAACATCGGTG  
GATATGCCAGTGCTTGATATCAGAAAGAGAATGGAGGAGACTGAGGTTATGTACAATGCATTGTCTGAGCTA  
TCTGTGCTCAAGGAGTCGGACAAGTTCGACGTTGATGTTTTTCCCGGATGTGCCAGACTTTGGAGGTAGACC  
CAATGACTGCAGCAAAGGTTATTGTGGCAGTGATGAGCAACGAGAGCGGACTGACTCTTACATTGCAACAGC  
CAACTGAAGCAAATGTCGATTGGCACTTAAAGATTGAGAAAAAGCCTCTGAGGGTGCAGTGTGTTACTTC  
TAGAGATGTTGAAGAACCGTCCATGAAGGGTTCAATGGCAAGAGGAGAGTTACAATTGGCCGGTCTGTCTGG  
AGACCAACCAGAGTCTTCCTATACTCGGAACGAGGAAATAGAGTCATTAGAGCAATTCCACATGGCAACGGCT  
AGTTCGTTAATTCGGAAACAGATGAGTTCGATTGTGTACACGGGCCCATTAAGTTTCAGCAAATGAAAACT  
TTATTGATAGCCTGGTAGCATCACTCTCTGCTGCGGTGTGCAACCTAGTCAAGATCCTAAAGGATACAGCTGCT  
ATAGATCTCGAAACCCGTCAGAAGTTTGGAGTCTTAGATGTTGCGACCAAAGATGGTTAATTAACCTTTAG  
CCAAGAATCACGCATGGGGCGTTATTGAAACACATGCTAGGAAGTACCACGTTGCACTTTTGGAGTATGATGA  
GCATGGAGTGGTAACTTGCGACAGTTGGAGAAGGGTGGCCGTGAGTTCTGAGTCAATGGTTTATTCTGATAT  
GGCAAAGCTCAGAACTGAGGAGATTATTAAGGGATGGTGAGCCTCATGTCAGCAGTGCTAAAGTCGTCTCT  
AGTTGACGGTGTCCCGGGTTGTGGAAAGACAAAAGAGATTCTCTCAAAGTAAATTTTGAGGAAGATCTAAT  
CTTAGTACCGGTAAGCAGGCTGCTGAAATGATAAAGAGGCGTGCTAATGCGTCAGGAATAATTCAAGCCAC  
AAGAGATAATGTTCTGACTGTTGATTCAATTATAATGAATTACGGTAAAGGAACACGCTGTCAGTTCAAAGG  
TTATTTATCGACGAAGGTCTGATGTTGCACACTGGTTGTGTGAATTTCTTGTCTATGTCTCTGTGCGAAATT  
GCATATGTTTATGGAGACACACAACAATTCCATACATCAACAGAGTATCCGGTTTTCCGTACCCTGCACATTT  
TGCAAAAATAGAGTTGATGAGGTGGAACTCGCAGAACTACGTCGTTGTCCAGCCGACATTACCCACTAT  
CTTAACAGAAGGTACGAAGGACATGTCATGTGTACATCGTCGGTTAAAAAGTCAGTTTCTCAGGAAATGGTGA  
GCGGGGCCGCAATGATCAATCCTGTATCTAAGCCACTGAATGGGAAAGTTTTGACTTTCACTCAGTCTGATAA  
AGAGGCGCTGCTTCTCGAGGATATACGGACGTCCATACAGTACATGAGGTACAAGGTGAGACATATGCAGA  
TGTGTGCTTGGTCAGATTGACTCCGACACCTGTATCTATCATCGCAGGAGATAGTCCGCACGTTCTCGTAGCTT  
TGTCAAGGCATACCCAAACATTGAAGTATTACACCGTAGTGATGGATCCTCTTGTAAGTATAATTAGGGATTTA  
GAAAACTTAGTTCTTACTTGTTAGATATGTATAAAGTAGATGCAGGGACCCAATAGCAATTACAGGTAGACT  
CCGTGTTTAAAGGTTCTAATCTTTTTGTTGCAGCACCAAAGACTGGAGATATCTCAGATATGCAATTTTACTAT  
GATAAGTGTCTCCAGGTAATAGCACCATGTTAAATACTATGATGCTGTTACCATGAGGTTGACTGACATTTCT  
TCTTAATGTCAAAGATTGCATATTGGATTTCTCTAAGTCTGTGGCTGCACCGAAGGATCCGATCAAACCACTGA  
TTCCAATGGTACGAACGGCGGCAGAAATGCCACGCCAGACTGGACTATTGGAAAATTTGGTGGCGATGATCA  
AAAGAACTTTAATTCACCGGAGTTATCAGGAATAATCGACATTGAGAATACTGCATCTTTAGTAGTAGATAA  
ATTTTTGATAGTTACTTGCTTAAAGAAAAAGAAAACCAAATAAAAATGTTTCTTTATTTAGTAGAGAGTCTC  
TCAATAGATGGTTAGAGAAGCAGGAGCAAGTGACCATTGGTCAGCTTGAGATTTTGATTTTGTGGATCTTCC  
TGCCGTTGATCAGTACAGGCATATGATTAAAGCACAACTAAGCAGAAGTTGGATACATCAATTCAAAGCGAA  
TATCCGGCCTTGACAGCATTGTGTATCATTCGAAAAAGATCAACGCAATCTTCGGTCTTTGTTGAGTGAGCT  
CACAAGGCAAATGCTCGAAAGCATAGACTCAAGTAAGTTTTGTTCTTTACAAGGAAGACGCCAGCTCAAATT  
GAGGATTTCTTCGAGATCTCGATAGCCATGTCCCTATGGATATCTTGGAGTTGGATATTTGGAAGTATGACA  
AATCTCAGAACGAGTTCCACTGTGCAGTAGAGTATGAAATATGGAGAAGACTTGGATTAGAAGATTTTCTGG  
GAGAAGTTTGGAAACAAGGCCACAGGAAAACACTCTTAAAGATTACACAGCTGGTATTTAAACGTGTTTATG  
GTACCAGAGAAAGAGTGGGGACGTTACAACATTCATCGTAATACGGTGATTATTGCTGCTTGTGTTAGCTTCC  
ATGTTGCCCATGGAGAAAATAATCAAAGGTGCATTTTTCGGAGATGACAGTTTACTATACTTCCAAAAGGTT  
GTGAGTTTCTGACATACAGCACAGCCAACCTTATGTGGAATTCGAGGCTAAGCTATTCAGAAAGCAGTA  
TGTTATTTCTGTGGAAGGTACGTGATACATCATGACAGAGGGTGTATTGTTTATTATGACCTTTGAAGTTGA

TTTCTAACTTGGTGCTAAACACATCAAGGATTGGGATCACTTAGAAGAGTTCAGAAGATCCCTTTGTGATGTT  
GCAAATTCGTTGAACAACTGTGCGTATTACACGCAGTTGGACGACGCTGTGAGTGAGGTCCATAAAACCGCAC  
CCCCGGGTTGTTTTGTGTATAAAAGTTTAGTTAAATATCTGTCCGATAAGGTTCTTTTAGAAGTTTGTATTAG  
ATGGCTCTTGTTAAGGGTAAAGTCAATATTAATGAGTTCATAGACTTGTCAAAATCAGAAAAATTTCTTCCGTC  
TATGTTACACCTGTTAAGAGTGTCTGATCTCCAAGGTTGATAAGATATTGGTTCATGAAGATGAATCTTTGT  
CCGAAGTCAATTTACTCAAAGGTGTAAACTCATTGATGGTGGCTATGTACATCTTGCTGGTCTTGTTGGTGACA  
GGTGAATGGAATTTGCCAGATAATTGTCGTGGTGGTGTCAAGTGTCTGTTTGGTCGATAAGAGAATGGAGAGA  
GCGGACGAGGCAACTCTTGCTTCATACTATACCGCAGCGGCTAAGAAAAGGTTTCAGTTCAAAGTCGTTCCAA  
ATTACAACATCACTACCAAGGACGCAGAAAAGGCAGTTTGGCAAGTACTAGTTAATATTAGAAATGTTAAAT  
TGCTGCGGGTACTGTCCGCTGTCATTAGAATTTGTGTCAAGTGTGATTGTTTATAAAAAATATTATAAACTCG  
GTTTGAGAGAGAAAATTACGAGCGTCACGGATGGAGGGCCCATGGAATATCAGAAGAAGTTGTTGATGAG  
TTCATTGAAGAAGTCCCGATGTCTGTAAGGCTTGCAAATTTGTTTGAAGACCGGAAAAAAGTTTAGTAGTA  
AAAGTGAGAATAATAGTGGAATAATAGGCCGAAACCAAACAAAAACCAAAGGAAGGAAAAGGGTTTAAAA  
GTTAGGGTTGAGAAGGATAATTTAATTGATAATGAATTGGAGACTTACATCGCCGATTGAGATTCGTATTA  
TATGTCTTACACAATCGCAACTCCATCGCAATTTGTGTTTTTGTCTCAGCATGGGCCGACCCTATAGAATTA  
AAATTTATGTACTAATTCAGTAAATCAGTTCCAAACACAACAAGCTAGAACAACCGTTCAACGGCAATTTA  
GCGAAGTGTGGAAACCTGTCCCTCAAGTCACTGTTAGGTTTCTGACAGTGGTTTTAAGGTGTATAGGTACAA  
TGCGGTACTAGATCCTCTAGTTACTGCTTTGTTAGGAGCTTCGATACTAGAAATAGGATTATAGAAGTCGAAA  
ATCAGGCGAACCCGACAACCGCCGAAACGTTAGACGCTACTCGTAGAGTAGATGACGCAACGGTGGCTATAA  
GGAGCGCTATAAATAATTTAGTAGTAGAATTGGTCAAAGGAACAGGTTTGTACAATCAGAGCACATTTGAAA  
GTGCATCCGGTTTACAATGGTCCTCTGCACCTGCATCTTGA

#OM892671

1

ATGGCATACACACAGACAGCTACCACATCCGCTTTGCTCGACACTGTCCGAGGTAACAATACCTTGGTCAACG  
ATCTTGCGAAGCGGCGTCTTTATGACACAGCGGTGACGAGTTCAACGCTCGTGATCGCAGGCCCAAAGTAA  
ATTTTTCCAAAGTAATAAGTGAGGAACAGACGCTTATTGCTACTAGGGCATATCCAGAATTCCAGATAACCTTC  
TATAATACGCAGAACGCCGTGCATTGCTTGCCGGTGGACTACGATCCTTAGAACTGGAATATCTAATGATGC  
AGATCCCGTACGGATCACTCACATATGATATAGGTGGGAATTTTGCATCTCATCTGTTCAAAGGACGGGCATA  
TGTTCACTGCTGTATGCCAATCTTGATGTCCGCGACATAATGCGGCACGAAGGCCAGAAAGACAGTATAGAA  
TTATACCTTTCCAGGCTTGAGCGGGGCAACAAAGTTGTCCCAAATTTCCAAAAGGAAGCTTTTGACAGATACG  
CTGAAACGCCAGACGAAGTTGTCTGTACAGTACCTTCCAAACGTGTACGCACCAGCAGGTGGAAAACACAG  
GCAGGGTGTATGCTATTGCATTGCACAGTATATACGATATACCTGCTGATGAATTCGGAGCGGCACTTTTAAG  
GAAAAATGTCCATGTTTGTACGCCGCTTCCACTTTTCCGAGAATTTACTTCTCGAAGATTCACACGTCAACCT  
TGACGAAATCAACGCGTGTTCGCGTGATGGAGACAAGCTGACTTTTTCTTCGCATCTGAGAGCACTTTAA  
ATTATTGTCATAGTTATTCTAATATTTTAAAATACGTGTGCAAACTTACTTCCCGGCATCTAATAGAGAGGTCT  
ACATGAAGGAGTTTTTGGTCACCAGGGTTAACACCTGGTTTTGTAAGTTTTCTAGGATAGATACTTTTTATTAT  
ACAAGGGGGTAGCCCAAAAGGTGTAAATAGTGAGCAATTTTACAGCGCAATGGAAGATGCATGGCACTACA  
AAAAGACTCTTGCAATGTGTAACAGCGAGAGGATTCTTCTGAAGATTCCTCATCGGTCAATTACTGGTTCCCA  
AAAATGAGAGATATGGTCATAGTTCTCTATTTCGACATATCTCTCGACACCAGTAAAAGGACCCGCAAAGAAG  
TCTTAGTGCAAAGGATTTTGTATTACAGTTTTTAAATCACATTCGCACTTATCAAGCCAAGGCACTTACATACT  
CCAATGTTTTATCCTTTGTGAATCAATTCGTTCAAGGGTAATTATCAACGGAGTGACTGCCAGGTCTGAGTGG  
GATGTTGACAAATCTTTTGAATCCTTGTCATGACATTTTCTTGCACTAAGCTTGCCGTTTTAAAAGAC  
GAATTGTTAATCAGCAAGTTTAGTTTGGGGCCAAAATCAGTAAGCCAGCATGTATGGGATGAGATTTCCCTGG



CTTTTGGAACGCATTTCCATCGATCAAGGAGAGACTGCTAAATCGGAACTAATTAAAGTGTCGGGAGACGC  
ATTAGAAATCAGGGTGCCTGATTTATATGTGACTTTTCACGATAGATTAGTGAAGTACAAAACATCGGTG  
GATATGCCAGTGCTTGATATCAGAAAGAGAATGGAGGAGACTGAGGTTATGTACAATGCATTGTCTGAGCTA  
TCTGTGCTCAAGGAGTCGGACAAGTTTCGACGTTGATGTTTTTCCCGGATGTGCCAGACTTTGGAGGTAGACC  
CAATGACTGCAGCAAAGGTTATTGTGGCAGTGATGAGCAACGAGAGCGGACTGACTCTTACATTGCAACAGC  
CAACTGAAGCAAATGTCGATTGGCACTTAAAGATTGAGAAAAAGCCTCTGAGGGTGCCTAGTGGTTACTTC  
TAGAGATGTTGAAGAACCATCCATGAAGGGTTCAATGGCAAGAGGAGAGTTACAATTGGCCGGTCTGTCTGG  
AGACCAACCAGAGTCTTCCTATACTCGGAACGAGGAAATAGAGTCATTAGAGCAATTCCACATGGCAACGGCT  
AGTTCGTTAATTCGGAAACAGATGAGTTGATTGTGTACACGGGCCCATTAAGTTGAGCAAATGAAAACT  
TTATTGATAGCCTGGTAGCATCACTCTCTGCTGCGGTGTGCAACCTAGTCAAGATCCTAAAGGATACAGCTGCT  
ATAGATCTCGAAACCCGTCAGAAGTTTGGAGTCTTAGATGTTGCGACCAAAAGATGGTTAATTAAACCTTTAG  
CCAAGAATCACGCATGGGGCGTTATTGAAACACATGCTAGGAAGTACCACGTTGCACTTTTGGAGTATGATGA  
GCATGGAGTGGTAACTTGCAGAGTTGGAGAAGGGTGGCCGTGAGTTCTGAGTCAATGGTTTATTCTGATAT  
GGCAAAGCTCAGAACACTGAGGAGATTATTAAGGGATGGTGAGCCTCATGTCAGCAGTGCTAAAGTCGTCT  
AGTTGACGGTGTCCCGGGTTGTGGAAAGACAAAAGAGATTCTCTCGAAAGTAAATTTGAGGAAGATCTAAT  
CTTAGTACCGGGTAAGCAGGCTGCTGAAATGATAAAGAGGCGTGCTAATGCGTCAGGAATAATTCAAGCCAC  
AAGAGATAATGTTCTGACTGTTGATTCAATTATAATGAATTACGGTAAAGGAACACGCTGTCAGTTCAAAGG  
TTATTTATCGACGAAGGTCTGATGTTGCACACTGGTTGTGTGAATTTCTTGTCTATGTCTCTGTGCGAAATT  
GCATATGTTTATGGAGACACACAACAAATTCCATACATCAACAGAGTATCCGGTTTTCCGTACCCTGCACATTT  
TGCAAAAATAGAGTTGATGAGGTGGAACTCGCAGAACTACGCTGCGTTGTCCAGCCGACATTACCCACTAT  
CTTAACAGAAGGTACGAAGGATATGTCATGTGTACATCGTCGGTTAAAAAGTCAGTTTCTCAGGAAATGGTGA  
GCGGGGCCGCAATGATCAATCCTGTATCTAAGCCACTGAATGGGAAAGTTTTGACTTTCACTCAGTCTGATAA  
AGAGGCGCTGCTTCTCGAGGATATACGGACGTCCATACAGTACATGAGGTACAAGGTGAGACATATGCAGA  
TGTGTGCTTGGTCAGATTGACTCCGACACCTGTATCTATCATCGCAGGAGATAGTCCGCACGTTCTCGTAGCTT  
TGTCAAGGCATACCCAAACATTGAAGTATTACACCGTAGTGATGGATCCTCTTGTAAGTATAATTAGGGATTTA  
GAAAACTTAGTTCTTACTTGTTAGATATGTATAAAGTAGATGCAGGGACCCAATAGCAATTACAGGTAGACT  
CCGTGTTTAAAGGTTCTAATCTTTTTGTTGCAGCACCAAGACTGGAGATATCTCAGATATGCAATTTTACTAT  
GATAAGTGCTCCCAGGTAATAGCACCATGTTAAATAACTATGATGCTGTTACCATGAGGTTGACTGACATTTCT  
TCTAATGTCAAAGATTGCATATTGGATTTCTCTAAGTCTGTGGCTGCACCGAAGGATCCGATCAAACCACTGA  
TTCCAATGGTACGAACGGCGGCAGAAATGCCACGCCAGACTGGACTATTGGAAAATTTGGTGGCGATGATCA  
AAAGAACTTTAATTCACCGGAGTTATCGGGAATAATCGACATTGAGAATACTGCATCTTTAGTAGTAGATAA  
ATTTTTGATAGTTACTTGCTTAAAGAAAAAGAAAAACCAATAAAAAATGTTTCTTTATTTGTAGAGAGTCTCT  
CAATAGATGGTTAGAGAAGCAGGAGCAAGTGACCATTTGGTCAGCTTGCAGATTTTGATTTTGTGGATCTTCT  
GCCGTTGATCAGTACAGGCATATGATTAAGCGCAACCTAAGCAGAAGCTGGATACATCAATTCAAAGCGAAT  
ATCCGGCCTTGACAGCAGATTGTGTATCATTGAAAAAGATCAACGCAATCTTCGGTCTTTGTTGAGTGAGCTC  
ACAAGGCAAATGCTCGAAAGCATAGACTCAAGTAAGTTTTTGTCTTTACAAGGAAGACGCCAGCTCAAATTG  
AGGATTTCTTCGGAGATCTCGATAGCCATGTCCCTATGGATATCTTGGAGTTGGATATTTGAAAGTATGACAAA  
TCTCAGAACGAGTTCCACTGTGCAGTAGAGTATGAAATATGGAGAAGACTTGGATTAGAAGATTTTCTGGGA  
GAAGTTTGAAACAAGGCCACAGGAAAACACTCTTAAAGATTACACAGCTGGTATTAACCGTGTTTATGGT  
ACCAGAGAAAGAGTGGGGACGTTACAACATTATCGGTAATACGGTGATTATTGCTGCTTGTAGCTTCCAT  
GTTGCCCATGGAGAAAATAATCAAAGGTGCATTTTTCGGAGATGACAGTTTACTATACTTCCAAAAGGTTGT  
GAGTTTCTGACATACAGCATACAGCCAACCTTATGTGGAATTTGAGGCTAAGCTATTCAGAAAGCAGTATG  
GTTATTTCTGTGGAAGGTACGTGATACATCATGACAGAGGGTGTATTGTTTATTATGACCTTTGAAGTTGATT  
TCTAAACTTGGTGCTAAACACATCAAGGATTGGGATCACTTAGAAGAGTTCAGAAGATCCCTTTGTGATGTTG  
CAAATTCGTTGAACAACTGTGCGTATTACACGCAGTTGGACGACGCTGTGAGTGAGGTCCATAAAACCGCACC  
CCCGGGTTCGTTTGTGTATAAAAGTTTAGTTAAATATCTGTCCGATAAGGTTCTTTTTAGAAGTTTGTATAGA  
TGGCTCTTGTTAAGGGTAAAGTCAATATTAATGAGTTCATAGACTTGTCAAATCAGAAAAATTTCTCCGTCT  
ATGTTACACCTGTTAAGAGTGTGATGATCTCAAGGTTGATAAGATATTGGTTCATGAAGATGAATCTTTGTC

CGAAGTCAATTTACTCAAAGGTGTAAACTCATTGATGGTGGCTATGTACATCTTGCTGGTCTTGTTGGTGACA  
GGTGAATGGAATTTGCCAGATAATTGTCGTGGTGGTGTCAAGTGTCTGTTTGGTCGATAAGAGAATGGAGAGA  
GCGGACGAGGCAACTCTTGCTTCATACTATACCGCAGCGGCTAAGAAAAGGTTTCAGTTCAAAGTCGTTCCAA  
ATTACAACATCACTACCAAGGACGCAGAAAAGGCAGTTTGGCAAGTACTAGTTAATATTAGAAATGTTAAAT  
TGCTGCGGGTTACTGTCCGCTGTCATTAGAATTTGTGTCAAGTGTGATTGTTTATAAAAAATATTATAAACTCG  
GTTTGAGAGAGAAAATTACGAGCGTCACGGATGGAGGGCCCATGGAAGTATCAGAAGAAGTTGTTGATGAG  
TTCATGGAAGAAGTCCCGATGTCTGTAAGGCTTGCAAAATTTCTGTTGAAGACCGGAAAAAAGTTTAGTAGTA  
AAAGTGAGAATAATAGTGGTAATAATAGGCCGAAACCAACAAAAACCAAGGAAGGAAAAAGGGTTTAAAA  
GTTAGGGTTGAGAAGGATAATTTAATTGATAATGAATTGGAGACTTACATCGCCGATTGAGATTCGTATTAAA  
TATGTCTTACACAATCGCAACTCCATCGCAATTTGTGTTTTTGTGCATCAGCATGGGCCGACCCTATAGAATTAAT  
AAATTTATGTACTAATTCAGTAGGTAATCAGTTCCAAACACAACAAGCTAGAACAACCGTTCAACGGCAATTTA  
GCGAAGTGTGGAAACCTGTCCCTCAAGTCACTGTTAGGTTTCTGACAGTGGTTTAAAGGTGTATAGGTACAA  
TGCGGTACTAGATCCTCTAGTTACTGCTTTGTTAGGAGCTTCGATACTAGAAATAGGATTATAGAAGTCGAAA  
ATCAGGCGAACCCGACAACCGCCGAAACGTTAGACGCTACTCGTAGAGTAGATGACGCAACGGTGGCTATAA  
GGAGCGCTATAAATAATTTAGTAGTAGAATTGGTCAAAGGAACAGGTTTGTACAATCAGAGCACATTTGAAA  
GTGCATCCGGTTTACAATGGTCCTCTGCACCTGCATCTTGA

#OM892672

1

ATGGCATACACACAGACAGCTACCACATCCGCTTTGCTCGACACTGTCCGAGGTAACAATACCTTGGTCAACG  
ATCTTGCGAAGCGGCGTCTTTATGACACAGCGGTGACGAGTTCAACGCTCGTGATCGCAGGCCCAAAGTAA  
ATTTTTCCAAAGTAATAAGTGAGGAACAGACGCTTATTGCTACTAGGGCATATCCAGAATTCCAGATAACCTTC  
TATAATACGCAGAACGCCGTGCATTGCTTGCCGGTGGACTACGATCCTTAGAACTGGAATATCTAATGATGC  
AGATCCCGTACGGATCACTCACATATGATATAGGTGGGAATTTTGCATCTCATCTGTTCAAAGGACGGGCATA  
TGTTCACTGCTGTATGCCAATCTTGATGTCCGCGACATAATGCGGCACGAAGGCCAGAAAGACAGTATAGAA  
TTATACCTTTCCAGGCTTGAGCGGGGCAACAAAGTTGTCCCAAATTTCCAAAAGGAAGCTTTTGACAGATACG  
CTGAAACGCCAGACGAAGTTGTCTGTACAGTACCTTCCAAACGTGTACGCACCAGCAGGTGGAAAACACAG  
GCAGGGTGTATGCTATTGCATTGCACAGTATATACGATATACCTGCTGATGAATTCGGAGCGGCACTTTTAAAG  
GAAAAATGTCCATGTTTGTACGCCGCCTTCCACTTTTCCGAGAATTTACTTCTCGAAGATTCACACGTCAACCT  
TGACGAAATCAACGCGTGTTTTTCGCGTGATGGAGACAAGCTGACTTTTTCTTTCGCATCTGAGAGCACTTTAA  
ATTATTGTCATAGTTATTCTAATATTTTAAAATACGTGTGCAAACTTACTTCCCGGCATCTAATAGAGAGGTCT  
ACATGAAGGAGTTTTTGGTCACCAGGGTTAACACCTGGTTTTGTAAGTTTTCTAGGATAGATACTTTTTTATTAT  
ACAAGGGGGTAGCCCAAAAGGTGTAAATAGTGAGCAATTTTACAGCGCAATGGAAGATGCATGGCACTACA  
AAAAGACTCTTGCAATGTGTAACAGCGAGAGGATTCTTCTTGAAGATTCCTCATCGGTCAATTACTGGTTCCCA  
AAAATGAGAGATATGGTCATAGTTCCTCTATTTCGACATATCTCTCGACACCAGTAAAAGGACCCGCAAAGAAG  
TCTTAGTGTCAAAGGATTTTGTATTACAGTTTTTAAATCACATTCGCACTTATCAAGCCAAGGCACTTACATACT  
CCAATGTTTTATCCTTTGTGAATCAATTCGTTCAAGGGTAATTATCAACGGAGTGACTGCCAGGTCTGAGTGG  
GATGTTGACAAATCTTTTTGCAATCCTTGCCATGACATTTTTCTTGCACTAAGCTTGCCGTTTTTAAAGAC  
GAATTGTTAATCAGCAAGTTTAGTTTGGGGCCAAAATCAGTAAGCCAGCATGTATGGGATGAGATTTCACTGG  
CTTTTGAAACGCATTTCCATCGATCAAGGAGAGACTGCTAAATCGGAACTAATTAAGTGTCGGGAGACGC  
ATTAGAAATCAGGGTGCCTGATTTATATGTGACTTTTACGATAGATTAGTGACTGAGTACAAAACATCGGTG  
GATATGCCAGTGCTTGATATCAGAAAGAGAATGGAGGAGACTGAGGTTATGTACAATGCATTGTCTGAGCTA  
TCTGTGCTCAAGGAGTCGGACAAGTTTCGACGTTGATGTTTTTCCCGGATGTGCCAGACTTTGGAGGTAGACC  
CAATGACTGCAGCAAAGGTTATTGTGGCAGTGATGAGCAACGAGAGCGGACTGACTCTTACATTGCAACAGC

CAACTGAAGCAAATGTCGCATTGGCACTTAAAGATTGAGAAAAAGCCTCTGAGGGTGCAGTGGTACTTC  
TAGAGATGTTGAAGAACCATCCATGAAGGGTCAATGGCAAGAGGAGAGTTACAATTGGCCGGTCTGTCTGG  
AGACCAACCAGAGTCTTCCTATACTCGGAACGAGGAAATAGAGTCATTAGAGCAATCCACATGGCAACGGCT  
AGTTCGTTAATTCGGAACAGATGAGTTCGATTGTGTACACGGGCCCATTAAGTTCAGCAAATGAAAACT  
TTATTGATAGCCTGGTAGCATCACTCTCTGCTGCGGTGTGCAACCTAGTCAAGATCCTAAAGGATACAGCTGCT  
ATAGATCTCGAAACCCGTCAGAAGTTTGGAGTCTTAGATGTTGCGACCAAAGATGGTTAATTAACCTTTAG  
CCAAGAATCACGCATGGGGCGTTATTGAAACACATGCTAGGAAGTACCACGTTGCACTTTTGGAGTATGATGA  
GCATGGAGTGGTAACTTGCACAGTTGGAGAAGGGTGGCCGTGAGTTCTGAGTCAATGGTTTATTCTGATAT  
GGCAAAGCTCAGAACACTGAGGAGATTATTAAGGGATGGTGAGCCTCATGTCAGCAGTGCTAAAGTCGTCT  
AGTTGACGGTGTCCCGGGTTGTGGAAAGACAAAAGAGATTCTCTCGAAAGTAAATTTGAGGAAGATCTAAT  
CTTAGTACCGGGTAAGCAGGCTGCTGAAATGATAAAGAGGCGTGCTAATGCGTCAGGAATAATTCAAGCCAC  
AAGAGATAATGTTCTGACTGTTGATTCAATTTATAATGAATTACGGTAAAGGAACACGCTGTCAGTTCAAAGG  
TTATTTATCGACGAAGGTCTGATGTTGCACACTGGTTGTGTGAATTTCTTGTTTCTATGTCTCTGTGCGAAAT  
GCATATGTTTATGGAGACACACAACAAATCCATACATCAACAGAGTATCCGGTTTTCCGTACCCTGCACATTT  
TGCAAAAATAGAGTTGATGAGGTGGAACTCGCAGAACTACGCTGCGTTGTCCAGCCGACATTACCCACTAT  
CTTAACAGAAGGTACGAAGGACATGTCATGTGTACATCGTCGGTTAAAAAGTCAGTTTCTCAGGAAATGGTGA  
GCGGGGCCGCAATGATCAATCCTGTATCTAAGCCACTGAATGGGAAAGTTTTGACTTTCACTCAGTCTGATAA  
AGAGGCGCTGCTTCTCGAGGATATACGGACGTCCATACAGTACATGAGGTACAAGGTGAGACATATGCAGA  
TGTGTGCTTGGTCAGATTGACTCCGACACCTGTATCTATCATCGCAGGAGATAGTCCGCACGTTCTCGTAGCTT  
TGTCAAGGCATACCCAAACATTGAAGTATTACACCGTAGTGATGGATCCTCTTGTAAGTATAATTAGGGATTTA  
GAAAACTTAGTTCTTACTTGTTAGATATGTATAAAGTAGATGCAGGGACCCAATAGCAATTACAGGTAGACT  
CCGTGTTTAAAGGTTCTAATCTTTTTGTTGCAGCACCAAAGACTGGAGATATCTCAGATATGCAATTTTACTAT  
GATAAGTGCTCCCAGGTAATAGCACCATGTTAAATACTATGATGCTGTTACCATGAGGTTGACTGACATTTCT  
TCTTAATGTCAAAGATTGCATATTGGATTTCTCTAAGTCTGTGGCTGCACCGAAGGATCCGATCAAACCACTGA  
TTCCAATGGTACGAACGGCGGCAGAAATGCCACGCCAGACTGGACTATTGGAAAATTTGGTGGCGATGATAA  
AAAGAACTTTAATTCACCGGAGTTATCAGGAATAATCGACATTGAGAATACTGCATCTTTAGTAGTAGATAA  
ATTTTTGATAGTTACTTGCTTAAAGAAAAAGAAAAACCAAATAAAAAATGTTTCTTTATTTGTAGAGAGTCTCT  
CAATAGATGGTTAGAGAAGCAGGAGCAAGTGACCATTGGTCAGCTTGCAGATTTTGATTTTGTGGATCTTCTCT  
GCCGTTGATCAGTACAGGCATATGATTAAGCGCAACCTAAGCAGAAGCTGGATACATCAATTCAAAGCGAAT  
ATCCGGCCTTGCAGACGATTGTGTATCATTGAAAAAGATCAACGCAATCTTCGGTCTTTGTTTCAGTGAGCTC  
ACAAGGCAAATGCTCGAAAGCATAGACTCAAGTAAGTTTTGTTCTTTACAAGGAAGACGCCAGCTCAAATTG  
AGGATTTCTTCGGAGATCTCGATAGCCATGTCCCTATGGATATCTTGGAGTTGGATATTTGGAAGTATGACAAA  
TCTCAAACGAGTTCCACTGTGCAGTAGAGTATGAAATATGGAGAAGACTTGGATTAGAAGATTTTCTGGGA  
GAAGTTTGAAACAAGGCCACAGAAAACTACTCTTAAAGATTACACAGCTGGTATTAACCGTGTATGTTGTT  
ACCAGAGAAAGAGTGGGGACGTTACAACATTCGGAATACGGTGATTATTGCTGCTTGTGTTAGCTTCCAT  
GTTGCCCATGGAAAAATAATCAAAGGTGCATTTTGGGAGATGACAGTTTACTATACTTCCAAAAGGTTGT  
GAGTTTCTGACATACAGCATACAGCCAACCTTATGTGGAATTTGAGGCTAAGCTATTCAGAAAGCAGTATG  
GTTATTTCTGTGGAAGGTACGTGATACATCATGACAGAGGGTGTATTGTTTATTATGACCTTTGAAGTTGATT  
TCTAAACTTGGTGCTAAACACATCAAGGATTGGGATCACTTAGAAGAGTTCAGAAGATCCCTTTGTGATGTTG  
CAAATTCGTTGAACAACTGTGCGTATTACACGCAGTTGGACGACGCTGTGAGTGAGGTCCATAAAACCGCACC  
CCCGGGTTCGTTTGTGTATAAAAGTTTAGTTAAATATCTGTCCGATAAGGTTCTTTTGAAGTTTGTGTTATAGA  
TGGCTCTTGTTAAGGGTAAAGTCAATATTAATGAGTTCATAGACTTGTCAAATCAGAAAAATTTCTCCGTCT  
ATGTTACACCTGTTAAGAGTGTGATGATCTCAAGGTTGATAAGATATTGGTTCATGAAGATGAATCTTTGTC  
CGAAGTCAATTTACTCAAAGGTGTAAACTCATTGATGGTGGCTATGTACATCTTGCTGGTCTTGTGGTGACA  
GGTGAATGGAATTTGCCAGATAATTGTCGTGGTGGTGTGAGTGTCTGTTTGGTCGATAAGAGAATGGAGAGA  
GCGGACGAGGCAACTCTTGCTTCATACTATACCGCAGCGGCTAAGAAAAGGTTTCAGTTCAAAGTCGTTCCAA  
ATTACAACATCACTACCAAGGACGCAGAAAAGGCAGTTTGGCAAGTACTAGTTAATATTAGAAATGTTAAAT  
TGCTGCGGGTACTGTCCGCTGTCATTAGAATTTGTGTGAGTGTGATTGTTTATAAAAAATATTATAAACTCG

GTTTGAGAGAGAAAATTACGAGCGTCACGGATGGAGGGCCCATGGAATATCAGAAGAAGTTGTTGATGAG  
TTCATGGAAGAAGTCCCGATGTCTGTAAGGCTTGCAAAATTTCTGTTGAAGACCGGAAAAAAGTTTAGTAGTA  
AAAGTGAGAATAATAGTGGTAATAATAGGCCGAAACCAACAAAAACCAAAGGAAGGAAAAAGGGTTTAAAA  
GTTAGGGTTGAGAAGGATAATTTAATTGATAATGAATTGGAGACTTACATCGCCGATTGAGATTCGTATTAAA  
TATGTCTTACACAATCGCAACTCCATCGCAATTTGTGTTTTTGTCTATCAGCATGGGCCGACCCTATAGAATTAAT  
AAATTTATGTACTAATTCAGTAGGTAATCAGTTCCAAACACAACAAGCTAGAACAACCGTTCAACGGCAATTTA  
GCGAAGTGTGGAAACCTGTCCCTCAAGTCACTGTTAGGTTTCTGACAGTGGTTTTAAGGTGTATAGGTACAA  
TGCGGTACTAGATCCTCTAGTTACTGCTTTGTTAGGAGCTTCGATACTAGAAATAGGATTATAGAAGTCGAAA  
ATCAGGCGAACCCGACAACCGCCGAAACGTTAGACGCTACTCGTAGAGTAGATGACGCAACGGTGGCTATAA  
GGAGCGCTATAAATAATTTAGTAGTAGAATTGGTCAAAGGAACAGGTTTGTACAATCAGAGCACATTTGAAA  
GTGCATCCGGTTTACAATGGTCCTCTGCACCTGCATCTTGA

#OM892674

1

ATGGCATACACACAGACAGCTACCACATCCGCTTTGCTCGACACTGTCCGAGGTAACAATACCTTGGTCAATG  
ATCTTGCGAAGCGGCGTCTTTATGACACAGCGGTGACGAGTTCAACGCTCGTGATCGCAGGCCCAAAGTAA  
ATTTTTCCAAAGTAATAAGTGAGGAACAGACGCTTATTGCTACTAGGGCATATCCAGAATTCCAGATAACCTTC  
TATAATACGCAGAACGCCGTGCATTGCTTGCCGGTGGACTACGATCCTTAGAACTGGAATATCTAATGATGC  
AGATCCCGTACGGATCACTCACATATGATATAGGTGGGAATTTTGCATCTCATCTGTTCAAAGGACGGGCATA  
TGTTCACTGCTGTATGCCAATCTTGATGTCCGCGACATAATGCGGCACGAAGGCCAGAAAGACAGTATAGAA  
TTATACCTTTCCAGGCTTGAGCGGGGCAACAAAGTTGTCCCAAATTTCCAAAGGAAGCTTTTGACAGATACG  
CTGAAACGCCAGACGAAGTTGTCTGTACAGTACCTTCCAAACGTGTACGCACCAGCAGGTGGAAAACACAG  
GCAGGGTGTATGCTATTGCATTGCACAGTATATACGATATACCTGCTGATGAATTCGGAGCGGCACTTTTAAG  
GAAAAATGTCCATGTTTGTACGCCGCCTTCCACTTTTCCGAGAATTTACTTCTCGAAGATTCACACGTCAACCT  
TGACGAAATCAACGCGTGTTTTTCGCGTGATGGAGACAAGCTGACTTTTTCTTTCGCATCTGAGAGCACTTTAA  
ATTATTGTCATAGTTATTCTAATATTTTAAAATACGTGTGCAAACTTACTTCCCGGCATCTAATAGAGAGGTCT  
ACATGAAGGAGTTTTTAGTCACCAGGGTTAACACCTGGTTTTGTAAGTTTTCTAGGATAGATACTTTTTTATTAT  
ACAAGGGGGTAGCCCAAAAGGTGTAATAGTGAGCAATTTTACAGCGCAATGGAAGATGCATGGCACTACA  
AAAAGACTCTTGCAATGTGTAACAGCGAGAGGATTCTTCTGAAGATTCCTCATCGGTCAATTACTGGTTCCCA  
AAAATGAGAGATATGGTCATAGTTCTCTATTGACATATCTCTCGACACCAGTAAAAGGACCCGCAAAGAAG  
TCTTAGTGTCAAAGGATTTTGTATTACAGTTTTTAAATCACATTCGCACTTATCAAGCCAAGGCATTACATACT  
CCAATGTTTTATCCTTTGTGAATCAATTCGTTCAAGGGTAATTATCAACGGAGTGACTGCCAGGTCTGAGTGG  
GATGTTGACAAATCTTTTGCAATCCTTGCCATGACATTTTCTTGCACTAAGCTTGCCGTTTTAAAAGAC  
GAATTGTTAATCAGCAAGTTTAGTTTGGGGCCAAAATCAGTAAGCCAGCATGTATGGGATGAGATTTCCCTGG  
CTTTTGAAACGCATTTCCATCGATCAAGGAGAGACTGCTAAATCGGAACTAATTAAGTGTCGGGAGACGC  
ATTAGAAATCAGGGTGCCTGATTTATATGTGACTTTTACGATAGATTAGTGACTGAGTACAAAACATCGGTG  
GATATGTCAGTGCTTGATATCAGAAAGAGAATGGAGGAGACTGAGGTTATGTACAATGCATTGTCTGAGCTA  
TCTGTGCTCAAGGAGTCGGACAAGTTGACGTTGATGTTTTTCCCGGATGTGCCAGACTTTGGAGGTAGACC  
CAATGACTGCAGCAAAGGTTATAGTGGCAGTGATGAGCAACGAGAGCGGACTGACTCTTACATTGGAACAGC  
CAACTGAAGCAAATGTCGATTGGCACTTAAAGATTGAGAAAAAGCCTCTGAGGGTGCCTAGTGGTTACTTC  
TAGAGATGTTGAAGAACCATCCATGAAGGGTTCAATGGCAAGAGGAGAGTTACAATTGGCCGGTCTGTCTGG  
AGACCAACCAGAGTCTTCTATACTCGGAACGAGGAAATAGATTATTAGAGCAATTCCACATGGCAACGGCT  
AGTTCGTTAATTCGGAACAGATGAGTTGATTGTGTACACGGGCCCATTAAGTTGAGCAATGAAAACT  
TTATTGATAGCCTGGTAGCATCACTCTCTGCTGCGGTGTCGAACCTAGTCAAGATCCTAAAGGATACAGCTGCT

ATAGATCTCGAAACCCGTCAGAAGTTTGGAGTCTTAGATGTTGCGACCAAAGATGGTTAATTAACCTTTAG  
CCAAGAATCACGCATGGGGCGTTATTGAAACACATGCTAGGAAGTACCACGTTGCACTTTTGGAGTATGATGA  
GCATGGAGTGGTAACTTGCGACAGTTGGAGAAGGGTGGCCGTGAGTTCTGAGTCAATGGTTTATTCTGATAT  
GGCAAAGCTCAGAACTGAGGAGATTATTAAGAGATGGTGAGCCTCATGTCAGCAGTGCTAAAGTCGTCT  
AGTTGACGGTGTCCCGGTTGTGGAAAGACAAAAGAGATTCTCTCGAAAGTAAATTTTGAGGAAGATCTAAT  
CTTAGTACCGGTAAAGCAGGCTGCTGAAATGATAAAGAGGCGTGCTAATGCGTCAGGAATAATTCAAGCCAC  
AAGAGATAATGTTCTGACTGTTGATTCAATTATAATGAACTACGGTAAAGGAACACGCTGTCAGTTCAAAAGG  
TTATTTATCGACGAAGGTCTGATGTTGCACACTGGTTGTGTGAATTTTCTGTTTCTATGTCTCTGTGCGAAATT  
GCATATGTTTATGGAGACACACAACAAATTCATACATCAACAGAGTATCCGGTTTTCCGTACCCTGCACATTT  
TGCAAAAATAGAGGTTGATGAGGTGGAACTCGCAGAACTACGCTGCGTTGTCCAGCCGACATTACCCACTAT  
CTTAACAGAAGGTACGAAGGACATGTCATGTGTACATCGTCGGTTAAAAAGTCAGTTTCTCAGGAAATGGTGA  
GCGGGGCCGCAATGATCAATCCTGTATCTAAGCCATTGAATGGGAAAGTTTTGACTTTCACTCAGTCTGATAA  
AGAGGCGCTGCTTCTCGAGGATATACGGACGTCCATACAGTACATGAGGTACAAGGTGAGACATATGCAGA  
TGTGTCGTTGGTCAGATTGACTCCGACACCTGTATCTATCATCGCAGGAGATAGTCCGCACGTTCTCGTAGCTT  
TGTCAAGGCATACCCAAACATTGAAGTATTACACCGTAGTGATGGATCCTCTTGTAAGTATAATTAGGGATTTA  
GAAAACTTAGTTCTTACTTGTTAGATATGTATAAAGTAGATGCAGGGACCCAATAGCAATTACAGGTAGACT  
CCGTGTTTAAAGGTTCTAATCTTTTTGTTGCAGCACCAAAGACTGGAGATATCTCAGATATGCAATTTTACTAT  
GATAAGTGCTCCCAGGTAATAGCACCATGTTAAATACTATGATGCTGTTACCATGAGGTTGACTGACATTTT  
TCTTAATGTCAAAGATTGCATATTGGATTTCTCTAAGTCTGTGGCTGCACCGAAGGATCCGATCAAACCACTGA  
TTCCAATGGTACGAACGGCGGCAGAAATGCCACGCCAGACTGGACTATTGGAAAATTTGGTGGCGATGATCA  
AAAGAACTTTAATTCACCGGAGTTATCAGGAATAATCGACATTGAGAATACTGCATCTTAGTAGTAGATAA  
ATTTTTGATAGTTACTTGCTTAAAGAAAAAGAAAACCAAATAAAAATGTTTCTTTATTTGTAGAGAGTCTCT  
CAATAGATGGTTAGAGAAGCAGGAGCAAGTGACCATTGGTCAGCTTGCGGATTTTGATTTGTGGATCTTCTT  
GCCGTTGATCAGTACAGGCATATGATTAAGCGCAACCTAAGCAGAAGCTGGATACATCAATTCAAAGCGAAT  
ATCCGGCCTTGACAGCAGATTGTGTATCATTGAAAAAGATCAACGCAATCTTCGGTCTTTGTTTCAGTGAGCTC  
ACAAGGCAAATGCTCGAAAGCATAGACTCAAGTAAGTTTTTGTCTTTACAAGGAAGACGCCAGCTCAAATTG  
AGGATTTCTTCGGAGATCTCGATAGCCATGTCCCTATGGATATCTTGGAGTTGGATATTTGAAAGTATGACAAA  
TCTCAGAACGAGTTCCACTGTGCAGTAGAGTATGAAATATGGAGAAGACTTGGATTAGAAGATTTTCTGGGA  
GAAGTTTGAAACAAGGCCACAGAAAACTACTCTTAAAGATTACACAGCTGGTATTAACCGTGTTTATGGT  
ACCAGAGAAAGAGTGGAGACGTTACAACATTCATCGGTAATACGGTGATTATTGCTGCATGTTTAGCTTCCAT  
GTTGCCCATGGAGAAAATAATCAAAGGTGCATTTTGCGGAGATGACAGTTTACTATACTTCCAAAAGGTTGT  
GAGTTTCTGACATACAGCATAACAGCCAACCTTATGTGGAATTTGAGGCTAAGCTATTCAGAAAGCAGTATG  
GTTATTTCTGTGGAAGGTACGTGATACATCATGACAGAGGGTGTATTGTTTATTATGACCTTTGAAGTTGATT  
TCTAAACTTGGTGCTAAACACATCAAGGATTGGGATCACTTAGAAGAGTTCAGAAGATCCCTTTGTGATGTTG  
CAATTTGTTGAACAACTGTGCGTATTACACGCAGTTGGACGACGCTGTGAGTGAGGTCCATAAAACCGCACC  
CCCGGTTGCTTTGTTTATAAAAGTTTGTAAATATCTGTCCGATAAGGTTCTTTTGAAGTTTGTATAGA  
TGGCTCTTGTTAAGGGTAAAGTCAATATTAATGAGTTCATAGACTTGTCAAAATCAGAAAAATTTCTCCGTCT  
ATGTTACACCTGTTAAGAGTGTGATGATCTCCAAGGTTGATAAGATATTGGTTCATGAAGATGAATCTTTGTC  
CGAAGTCAATTTACTCAAAGGTGTAAACTCATTGATGGTGGCTATGTACATCTTGCTGGTCTTGTTGTTGACA  
GGTGAATGGAATTTGCCAGATAATTGTCGTGGTGGTGTGAGTGTCTGTTTGGTCGATAAGAGAATGGAGAGA  
GCGGACGAGGCAACTCTTGCTTCATACTATACCGCAGCGGCTAAGAAAAGGTTTCAGTTCAAAGTCGTTCCAA  
ATTACAACATCACTACCAAGGACGCAGAAAAGGCAGTTTGGCAAGTACTAGTTAATATTAGAAATGTTAAAT  
TGCTGCGGGTTACTGTCCGCTGTCATTAGAATTTGTGTGAGTGTGATTGTTTATAAAAATATTATAAACTCG  
GTTTGAGAGAGAAAATTACGAGCGTCACGGATGGAGGGCCCATGGAATATCAGAAGAAGTTGTTGATGAG  
TTCATGGAAGAAGTCCCGATGTCTGTAAGGCTTGCAAAATTTGTTTGAAGACCGGAAAAAGTTTAGTAGTA  
AAAGTGAGAATAATAGTGGTAATAATAGGCCGAAGCCAGGCAAAAACCAAAGGAAGGAAAAGGGTTTAAAA  
GTTAGGGTTGAGAAAGATAATTTAATTGATAATGAATTGGAGACTTACGTCGCCGATTGAGATTCGATTTAAA  
TATGTCTTACACAATCGCAACTCCATCGCAATTTGTGTTTTGTGTCATCAGCATGGGCCGACCCTATAGAATTAAT

AAATTTATGTACTAATTCAGTACTAGGTAATCAGTTCCAAACACAACAAGCTAGAACAAACCGTTCAACGGCAATTTA  
GCGAAGTGTGGAAACCTGTCCCTCAAGTCACTGTTAGGTTTCTGACAGTGGTTTTAAGGTGTATAGGTACAA  
TGCGGTACTAGATCCTCTAGTTACTGCTTTGTTAGGAGCTTCGATACTAGAAATAGGATTATAGAAGTCGAAA  
ATCAGGCGAACCCGACAACCGCCGAAACGTTAGACGCTACTCGTAGAGTAGATGACGCAACGGTGGCTATAA  
GGAGCGCTATAAATAATTTAGTAGTAGAATTGGTCAAAGGAACAGGTTTGTACAATCAGAGCACATTTGAAA  
GTGCATCCGGTTTACAATGGTCCCCTGCACCTGCATCTTGA

#OM892675

1

ATGGCATAACACAGACAGCTACCACATCCGCTTTGCTCGACACTGTCCGAGGTAACAATACCTTGGTCAACG  
ATCTTGCGAAGCGGCGTCTTTATGACACAGCGGTGACGAGTTCAACGCTCGTGATCGCAGGCCCAAAGTAA  
ATTTTTCCAAAGTAATAAGTGAGGAACAGACGCTTATTGCTACTAGGGCATATCCAGAATTCCAGATAACCTC  
TATAATACGCAGAACGCCGTGCATTGCTTGGCGGTGGACTACGATCCTTAGAACTGGAATATCTAATGATGC  
AGATCCCGTACGGATCACTCACATATGATATAGGTGGGAATTTTGCATCTCATCTGTTCAAAGGACGGGCATA  
TGTTCACTGCTGTATGCCAATCTTGATGTCCGCGACATAATGCGGCACGAAGGCCAGAAAGACAGTATAGAA  
TTATACCTTTCCAGGCTTGAACGGGGCAACAAAGTTGTCCCAAATTTCCAAAAGGAAGCTTTTGACAGATACG  
CTGAAACGCCAGACGAAGTTGTCTGTCACAGTACCTTCCAAACGTGTACGCACCAGCAGGTGGAAAACACAG  
GCAGGGTGTATGCTATTGCATTGCACAGTATATACGATATACCTGCTGATGAATTCGGAGCGGCACTTTTAAG  
GAAAAATGTCCATGTTTGTACGCCGCCTTCCACTTTTCCGAGAATTTACTTCTCGAAGATTCACACGTCAACCT  
TGACGAAATCAACGCGTGTTTTTCGCGTGATGGAGACAAGCTGACTTTTTCTTTCGCATCTGAGAGCACTTTAA  
ATTATTGTCATAGTTATTCTAATATTTTAAAATACGTGTGCAAACTTACTTCCCGGCATCTAATAGAGAGGTCT  
ACATGAAGGAGTTTTTGGTCACCAGGGTTAACACCTGGTTTTGTAAGTTTTCTAGAATAGATACTTTTTTATTAT  
ACAAGGGGGTAGCCCAACAAAGGTGTAATAGTGAGCAATTTTACAGCGCAATGGAAGATGCATGGCACTACA  
AAAAGACTCTTGCAATGTGTAAACAGCGAGAGGATTCTTCTGAAGATTCCTCATCGGTCAATTACTGGTTCCCA  
AAAATGAGAGATATGGTCATAGTTCTCTATTGACATATCTCTCGACACCAGTAAAAGGACCCGCAAGAAG  
TCTTAGTGTCAAAGGATTTTGTATTACAGTTTTTAAATCACATTCGCACTTATCAAGCCAAGGCATTACATACT  
CCAATGTTTTATCCTTTGTGAATCAATTCGTTCAAGGGTAATTATCAACGGAGTGACTGCCAGGTCTGAGTGG  
GATGTTGACAAATCTTTTTGCAATCCTTGTCATGACATTTTTCTTGCACTAAGCTTGCCGTTTTAAAAGAC  
GAATTGTTAATCAGCAAGTTTAGTTTGGGGCCAAAATCAGTAAGCCAGCATGTATGGGATGAGATTTCCCTGG  
CTTTTGAAACGCATTTCCATCGATCAAGGAGAGACTGCTAAATCGGAACTAATTAAGTGTCGGGAGACGC  
ATTAGAAATCAGGGTGCCTGATTTATATGTGACTTTTACGATAGATTAGTGACTGAGTACAAAACATCGGTG  
GATATGCCAGTGCTTGATATCAGAAAGAGAATGGAGGAGACTGAGGTTATGTACAATGCATTGTCTGAGCTA  
TCTGTGCTCAAGGAGTCGGACAAGTTGACGTTGATGTTTTTCCCGGATGTGCCAGACTTTGGAGGTAGACC  
CAATGACTGCAGCAAAGGTTATTGTGGCAGTGATGAGCAACGAGAGCGGACTGACTCTTACATTGCAACAGC  
CAACTGAAGCAAATGTCGATTGGCACTTAAAGATTGAGAAAAAGCCTCTGAGGGTGCACTAGTGGTTACTTC  
TAGAGATGTTGAAGAACCATCCATGAAGGGTTCAATGGCAAGAGGAGATTACAATTGGCCGGTCTGTCTGG  
AGACCAACCAGAGTCTTCTATACTCGGAACGAGGAAATAGAGTCATTAGAGCAATTCCACATGGCAACGGCT  
AGTTCGTTAATTCGAAACAGATGAGTTCGATTGTGTACACGGGCCCATTAAGTTGAGCAATGAAAACT  
TTATTGATAGCCTGGTAGCATCACTCTCTGCTGCGGTGTGCAACCTAGTCAAGATCCTAAAGGATACAGCTGCT  
ATAGATCTCGAAACCCGTCAGAAGTTTGGAGTCTTAGATGTTGCGACCAAAGATGGTTAATTAAACCTTTAG  
CCAAGAATCACGCATGGGGCGTTATTGAAACACATGCTAGGAAGTACCACGTTGCACTTTTGGAGTATGATGA  
GCATGGAGTGGTAACTTGCGACAGTTGGAGAAGGGTGGCCGTGAGTTCTGAGTCAATGGTTTATTCTGATAT  
GGCAAAGCTCAGAACACTGAGGAGATTATTAAGGGATGGTGAGCCTCATGTCAGCAGTGCTAAAGTCGTCT  
AGTTGACGGTGTCCCGGGTTGTGGAAAGACAAAAGAGATTCTCTCGAAAGTAAATTTGAGGAAGATCTAAT

CTTAGTACCGGGTAAGCAAGCTGCTGAAATGATAAAGAGGCGTGCTAATGCGTCAGGAATAATTCAAGCCAC  
AAGAGATAATGTTCTGACTGTTGATTCAATTATAATGAATTACGGTAAAGGAACACGCTGTCAGTTCAAAAGG  
TTATTTATCGACGAAGGTCTGATGTTGCACACTGGTTGTGTGAATTTCTGTTTCTATGTCTCTGTGCGAAATT  
GCATATGTTTATGGAGACACACAACAAATTCCATACATCAACAGAGTATCCGGTTTTCCGTACCCTGCACATTT  
TGCAAAAATAGAGGTTGATGAGGTGGAAGTCTGCAGAACTACGCTGCGTTGTCCAGCCGACATTACCCACTAT  
CTTAACAGAAGGTACGAAGGACATGTCATGTGTACATCGTCGGTTAAAAAGTCAGTTTCTCAGGAAATGGTGA  
GCGGGGCCGCAATGATCAATCCTGTATCTAAGCCACTGAATGGGAAAGTTTTGACTTTCACTCAGTCTGATAA  
AGAGGCGCTGCTTCTCGAGGATATACGGACGTCCATACAGTACATGAGGTACAAGGTGAGACATATGCAGA  
TGTGTGCTTGGTCAGATTGACTCCGACACCTGTATCTATCATCGCAGGAGATAGTCCGCACGTTCTCGTAGCTT  
TGTCAAGGCATACCCAAACATTGAAGTATTACACCGTAGTGATGGATCCTCTTGTAAGTATAATTAGGGATTTA  
GAAAACTTAGTTCTTACTTGTTAGATATGTATAAAGTAGATGCAGGGACCCAATAGCAATTACAGGTAGACT  
CCGTGTTTAAAGGTTCTAATCTTTTTGTTGCAGCACCAAAGACTGGAGATATCTCAGATATGCAATTTTACTAT  
GATAAGTGTCTCCAGGTAATAGCACCATGTTAAATACTATGATGCTGTTACCATGAGGTTGACTGACATTTT  
TCTTAATGTCAAAGATTGCATATTGGATTTCTCTAAGTCTGTGGCTGCACCGAAGGATCCGATCAAACCACTGA  
TTCCAATGGTACGAACGGCGGCAGAAATGCCACGCCAGACTGGACTATTGGAAAATTTGGTGGCGATGATCA  
AAAGAACTTTAATTCACCGGAGTTATCAGGAATAATCGACATTGAGAATACTGCATCTTTAGTAGTAGATAA  
ATTTTTGATAGTTACTTGCTTAAAGAAAAAGAAAACCAAATAAAAATGTTTCTTTATTTGTAGAGAGTCTCT  
CAATAGATGGTTAGAGAAGCAGGAGCAAGTGACCATTGGTCAGCTTGCAGATTTTGATTTGTGGATCTTCT  
GCCGTTGATCAGTACAGGCATATGATTAAGCGCAACCTAAGCAGAAGCTGGATACATCAATTCAAAGCGAAT  
ATCCGGCCTTGCAGACGATTGTGTATCATTGAAAAAGATCAACGCAATCTTCGGTCCTTTGTTTCAGTGAGCTC  
ACAAGGCAAATGCTCGAAAGCATAGACTCAAGTAAGTTTTTGTCTTTACAAGGAAGACGCCAGCTCAAATTG  
AGGATTTCTTCGGAGATCTCGATAGCCATGTCCCTATGGATATCTTGGAGTTGGATATTTGAAAGTATGACAAA  
TCTCAAACGAGTTCCACTGTGCAGTAGAGTATGAAATATGGAGAAGACTTGGATTAGAAGATTTTCTGGGA  
GAAGTTTGAAACAAGGCCACAGAAAACTACTCTTAAAGATTACACAGCTGGTATTAACCGTGTTTATGGT  
ACCAGAGAAAGAGTGGGGACGTTACAACATTCATCGTAATACGGTGATTATTGCTGCTTGTAGCTTCCAT  
GTTGCCCATGGAGAAAATAATCAAAGGTGCATTTTGCAGGAGATGACAGTTTACTATACTTCCAAAAGGTTGT  
GAGTTTCTGACATACAGCATACAGCCAACCTTATGTGGAATTTGAGGCTAAGCTATTCAGAAAGCAGTATG  
GTTATTTCTGTGGAAGGTACGTGATACATCATGACAGAGGGTGTATTGTTTATTATGACCTTTGAAGTTGATT  
TCTAAACTTGGTGCTAAACACATCAAGGATTGGGATCACTTAGAAGAGTTCAGAAGATCCCTTTGTGATGTTG  
CAAATTCGTTGAACAACTGTGCGTATTACACGCAGTTGGACGACGCTGTGAGTGAGGTCCATAAAACCGCACC  
CCCGGGTTCGTTTGTGTATAAAAGTTTAGTTAAATATCTGTCCGATAAGGTTCTTTTAGAAGTTTGTATAGA  
TGGCTCTTGTTAAGGGTAAAGTCAATATTAATGAGTTCATAGACTTGTCAAATCAGAAAAATTTCTCCGTCT  
ATGTTACACCTGTTAAGAGTGTGATGATCTCCAAGGTTGATAAGATATTGGTTCATGAAGATGAATCTTTGTC  
CGAAGTCAATTTACTCAAAGGTGTAAACTCATTGATGGTGGCTATGTACATCTTGCTGGTCTCGTGGTGACA  
GGTGAATGGAATTTGCCAGATAATTGTCGTGGTGGTGTGAGTGTCTGTTTGGTCGATAAGAGAATGGAGAGA  
GCGGACGAGGCAACTCTTGCTTCACTATACCGCAGCGGCTAAGAAAAGGTTTCAGTTCAAAGTCGTTCCAA  
ATTACAACATCACTACCAAGGACGCAGAAAAGGCAGTTTGGCAAGTACTAGTTAATATTAGAAATGTTAAAT  
TGCTGCGGGTACTGTCCGCTGTCATTAGAATTTGTGTGAGTGTGATTGTTTATAAAAAATATTATAAACTCG  
GTTTGAGAGAGAAAATTACGAGCGTCACGGATGGAGGGCCCATGGAAGTATCAGAAGAAGTTGTTGATGAG  
TTCATGGAAGAAGTCCCGATGTCTGTAAGGCTTGCAAAATTTGTTTGAAGACCGGAAAAAGTTTAGTAGTA  
AAAGTGAGAATAATAGTGGAATAATAGGCCGAAACCAAACAAAAACCAAAGGAAGGAAAAGGGTTAAAA  
GTTAGGGTTGAGAAGGATAATTAATTGATAATGAATTGGAGACTTACATCGCCGATTGAGATTCGATTAAA  
TATGTCTTACACAATCGCAACTCCATCGCAATTTGTGTTTTGTGTCATCAGCATGGGCCGACCCTATAGAATTA  
AAATTTATGTACTAATCACTAGGTAATCAGTTCCAAACACAACAAGCTAGAACAACCGTTCAACGGCAATTA  
GCGAAGTGTGGAACCTGTCCCTCAAGTCACTGTTAGGTTTCTGACAGTGGTTTTAAGGTGTATAGGTACAA  
TGCGGTACTAGATCCTCTAGTTACTGCTTTGTTAGGAGCTTTGATACTAGAAATAGGATTATAGAAGTCGAAA  
ATCAGGCGAACCCGACAACCGCCGAAACGTTAGACGCTACTCGTAGAGTAGATGACGCAACGGTGGCTATAA

GGAGCGCTATAAATAATTTAGTAGTAGAATTGGTCAAAGGAACAGGTTTGTACAATCAGAGCACATTTGAAA  
GTGCATCCGGTTTACAATGGTCCTCTGCACCTGCATCTTGA

#OM892676

1

ATGGCATACACACAGACAGCTACCACATCCGCTTTGCTCGACACTGTCCGAGGTAACAATACCTTGGTCAATG  
ATCTTGCGAAGCGGCGTCTTTATGACACAGCGGTGCGACGAGTTCAACGCTCGTGATCGCAGGCCCAAAGTAA  
ATTTTTCCAAAGTAATAAGTGAGGAACAGACGCTTATTGCTACTAGGGCATATCCAGAATTCCAGATAACCTTC  
TATAATACGCAGAACGCCGTGCATTGCTTGCCGGTGGACTACGATCCTTAGAACTGGAATATCTAATGATGC  
AGATCCCGTACGGATCACTCACATATGATATAGGTGGGAATTTTGCATCTCATCTGTTCAAAGGACGGGCATA  
TGTTCACTGCTGTATGCCTAATCTTGATGTCCGCGACATAATGCGGCACGAAGGCCAGAAAGACAGTATAGAA  
TTATACCTTTCCAGGCTTGAGCGGGGCAACAAAGTTGTCCCAAATTTCCAAAAGGAAGCTTTTGACAGATACG  
CTGAAACGCCAGACGAAGTTGTCTGTACAGTACCTTCCAAACGTGTACGCACCAGCAGGTGGAAAACACAG  
GCAGGGTGTATGCTATTGCATTGCACAGTATATACGATATACCTGCTGATGAATTCGGAGCGGCACTTTTAAG  
GAAAAATGTCCATGTTTGTACGCCCTTCCACTTTTCCGAGAATTTACTTCTCGAAGATTCACACGTCAACCT  
TGACGAAATCAACGCGTGTTTTTCGCGTGATGGAGACAAGCTGACTTTTTCTTTCGCATCTGAGAGCACTTTAA  
ATTATTGTCATAGTTATTCTAATATTTTAAAATACGTGTGCAAACTTACTTCCCGGCATCTAATAGAGAGGTCT  
ACATGAAGGAGTTTTTAGTCACCAGGGTTAACACCTGGTTTTGTAAGTTTTCTAGGATAGATACTTTTTTATTAT  
ACAAGGGGGTAGCCCAAAAGGTGTAAATAGTGAGCAATTTTACAGCGCAATGGAAGATGCATGGCACTACA  
AAAAGACTCTTGCAATGTGTAAACAGCGAGAGGATTCTTCTGAAGATTCCTCATCGGTCAATTACTGGTTCCCA  
AAAATGAGAGATATGGTCATAGTTCTCTATTGACATATCTCTCGACACCAGTAAAAGGACCCGCAAAGAAG  
TCTTAGTGCAAAGGATTTTGTATTACAGTTTTTAAATCACATTGCACTTATCAAGCCAAGGCACTTACATACT  
CCAATGTTTTATCCTTTGTGAATCAATTCGTTCAAGGGTAATTATCAACGGAGTGACTGCCAGGTCTGAGTGG  
GATGTTGACAAATCTTTTTGCAATCCTTGTCATGACATTTTTCTTGCATACTAAGCTTGCCGTTTTAAAAGAC  
GAATTGTTAATCAGCAAGTTTAGTTTGGGGCCAAAATCAGTAAGCCAGCATGTATGGGATGAGATTTCCCTGG  
CTTTTGAAACGCATTTCCATCGATCAAGGAGAGACTGCTAAATCGGAACTAATTAAGTGTCGGGAGACGC  
ATTAGAAATCAGGGTGCCTGATTTATATGTGACTTTTACGATAGATTAGTGACTGAGTACAAAACATCGGTG  
GATATGCCAGTGCTTGATATCAGAAAGAGAATGGAGGAGACTGAGGTTATGTACAATGCATTGTCTGAGCTA  
TCTGTGCTCAAGGAGTCGGACAAGTTCGACGTTGATGTTTTTTCCCGGATGTGCCAGACTTTGGAGGTAGACC  
CAATGACTGCAGCAAAGGTTATAGTGGCAGTGATGAGCAACGAGAGCGGACTGACTCTTACATTGCAACAGC  
CAACTGAAGCAAATGTGCGATTGGCACTAAAAGATTGAGAAAAAGCCTCTGAGGGTGCCTAGTGGTTACTTC  
TAGAGATGTTGAAGAACCATCCATGAAGGGTTCAATGGCAAGAGGAGAGTTACAATTGGCCGGTCTGTCTGG  
AGACCAACCAGAGTCTTCTATACTCGGAACGAGGAAATAGAGTCATTAGAGCAATTCCACATGGCAACGGCT  
AGTTCGTTAATTCGGAAACAGATGAGTTCGATTGTGTACACGGGCCCATTAAGTTCAGCAAATGAAAACT  
TTATTGATAGCCTGGTAGCATCACTCTCTGCTGCGGTGTGCAACCTAGTCAAGATCCTAAAGGATACAGCTGCT  
ATAGATCTCGAAACCCGTCAGAAGTTTGGAGTCTTAGATGTTGCGACCAAAGATGGTTAATTAACCTTTAG  
CCAAAAATCACGCATGGGGCGTTATTGAAACACATGCTAGGAAGTACCACGTTGCACTTTTGAGATATGATGA  
GCATGGAGTGGTAACCTGCGACAGTTGGAGAAGGGTGGCCGTGAGTCTGAGTCAATGGTTTATTCTGATAT  
GGCAAAGCTCAGAACTGAGGAGATTATTAAGAGATGGTGAGCCTCATGTCAGCAGTGCTAAAGTCGTCCT  
AGTTGACGGTGTCCGGGTTGTGGAAAGACAAAAGAGATTCTCTCGAAAGTAAATTTGAGGAAGATCTAAT  
CTTAGTACCGGGTAAGCAGGCTGCTGAAATGATAAAGAGGCGTGCTAATGCGTCAGGAATAATTCAAGCCAC  
AAGAGATAATGTTCTGACTGTTGATTATTATAATGAATTACGGTAAAGGAACACGCTGTCAAGTTCAAAGG  
TTATTTATCGACGAAGGTCTGATGTTGCACACTGGTTGTGTGAATTTCTTGTCTATGTCTGTGCGAAATT  
GCATATGTATATGGAGACACACAACAAATTCATACATCAACAGAGTATCCGTTTTCCGTACCCTGCACATTT



TGCAAAAATAGAGGTTGATGAGGTGGAACACGCAGAACTACGCTGCGTTGTCCAGCCGACATTACCCACTA  
TCTTAACAGAAGGTACGAAGGACATGTCATGTGTACATCGTCGGTTAAAAAGTCAGTTTCTCAGGAAATGGTG  
AGCGGGGCCGCAATGATCAATCCTGTATCTAAGCCATTGAATGGGAAAGTTTTGACTTTCTACTCAGTCTGATA  
AAGAGGCGCTGCTTCTCGAGGATATACGGACGTCCATACAGTACATGAGGTACAAGGTGAGACATATGCAG  
ATGTGTCGTTGGTCAGATTGACTCCGACACCTGTATCTATCATCGCAGGAGATAGTCCGCACGTTCTCGTAGCT  
TTGTCAAGGCATACCCAAACATTGAAGTATTACACTGTAGTGATGGATCCTCTTGTAAGTATAATTAGGGATTT  
AGAAAACTTAGTTCTTACTTGTTAGATATGTATAAAGTAGATGCAGGGACCCAATAGCAATTACAGGTAGAC  
TCCGTGTTTAAAGGTTCTAATCTTTTTGTTGCAGCACCAAGACTGGAGATATCTCAGATATGCAATTTTACTAT  
GATAAGTGCTCCCAGGTAATAGCACCATGTTAAATAACTATGATGCTGTTACCATGAGGTTGACTGACATTC  
TCTTAATGTCAAAGATTGCATATTGGATTTCTCTAAGTCTGTGGCTGCACCGAAGGATCCGATCAAACCACTGA  
TTCCAATGGTACGAACGGCGGCAGAAATGCCACGCCAGACTGGACTATTGGAAAATTTGGTGGCGATGATCA  
AAAGAACTTTAATTCACCGGAGTTATCAGGAATAATCGACATTGAGAATACTGCATCTTTAGTAGTAGATAA  
ATTTTTGATAGTTACTTGCTTAAAGAAAAAGAAAAACCAAATAAAAAATGTTTCTTTATTTGTAGAGAGTCTCT  
CAATAGATGGTTAGAGAAGCAGGAGCAAGTGACCATTGGTCAGCTTGCAGATTTTGATTTGTGGATCTTCTCT  
GCCGTTGATCAGTACAGGCATATGATTAAAGCGCAACCTAAGCAGAAGCTGGATACATCAATTCAAAGCGAAT  
ATCCGGCCTTGACAGCATTGTGTATCATTGAAAAAGATCAACGCAATCTTCGGTCCTTTGTTTCAGTGAGCTC  
ACAAGGCAAATGCTCGAAAGCATAGACTCAAGTAAGTTTTTGTCTTTACAAGGAAGACGCCAGCTCAAATTG  
AGGATTTCTTCGGAGATCTCGATAGCCATGTCCCTATGGATATCTTGGAGTTGGATATTTCAAAGTATGACAAA  
TCTCAGAACGAGTTCCACTGTGCAGTAGAGTATGAAATATGGAGAAGACTTGGATTAGAAGATTTTCTGGGA  
GAAGTTTGAAACAAGGCCACAGAAAACTACTCTTAAAGATTACACAGCTGGTATTAAACGTGTTTATGGT  
ACCAGAGAAAGAGTGGGGACGTTACAACATTATCGGTAATACGGTGATTATTGCTGCTTGTTAGCTTCCAT  
GTTGCCCATGGAGAAAATAATCAAAGGTGCATTTTTCGGAGATGACAGTTTACTATACTTCCCAAAGGTTGT  
GAGTTTCTGACATACAGCATACAGCTAACCTTATGTGGAATTTTCGAGGCTAAGCTATTCAGAAAGCAGTATG  
GTTATTTCTGTGGAAGGTACGTGATACATCATGACAGAGGGTGTATTGTTTATTATGACCTTTGAAGTTGATT  
TCTAAACTTGGTGCTAAACACATCAAGGATTGGGATCACTTAGAAGAGTTCAGAAGATCCCTTTGTGATGTTG  
CAATTTGTTGAACAACGTGTCGTATTACACGCAGTTGGACGACGCTGTGAGTGAGGTCCATAAAACCGCACC  
CCCGGGTTCGTTTGTTTATAAAAGTTTAGTTAAATATCTGTCCGATAAGGTTCTTTTTAGAAAGTTGTTTATAGA  
TGGCTCTTGTTAAGGGTAAAGTCAATATTAATGAGTTCATAGACTTGTCAAATCAGAAAAATTTCTTCCGTCT  
ATGTTACACCTGTTAAGAGTGTGATCTCCAAGGTTGATAAGATATTGGTTCATGAAGATGAATCTTTGTC  
CGAAGTCAATTTACTCAAAGGTGTAAGTCACTTATGATGGTGGCTATGTACATCTTGCTGGTCTGTAGTGACAG  
GTGAATGGAATTTGCCAGATAATTGTCGTGGTGGTGTGAGTGTCTGTTTGGTCGATAAGAGAATGGAGAGAG  
CGGACGAGGCAACTCTTGCTTCATACTATACCGCAGCGGCTAAGAAAAGGTTTCAGTTCAAAGTCGTACCAAA  
TTACAACATCACTACCAAGGACGCAGAAAAGGCAGTTTGGCAAGTACTAGTTAATATTAGGAATGTTAAAATT  
GCTGCGGGTTACTGTCCGCTGTCATTAGAATTTGTGTGAGTGTGATTGTTTATAAAAATATTATAAACTCGG  
TTTGAGAGAGAAAATTACGAGCGTCACGGATGGAGGGCCCATGGAAGTATCAGAAGAAGTTGTTGATGAGTT  
CATGGAAGAAGTCCCGATGTCTGTAAGGCTTGCAAAATTCGTTTGAAGACCGGGAAAAAGTTTAGTAGTAA  
AAGTGAGAATAATAGTGTAATAATAGGCCGAAACCAGACAAAAACCAAAGGAAGGAAAAGGGTTTAAAG  
TTAGGGTTGAGAAGGATAATTTAATTGATAATGAATTGGAGACTTACGTCGCCGATTAGATTGCTATTAAAT  
ATGTCTTACACAATCGCAACTCCATCGCAATTTGTGTTTTGTATCAGCATGGGCCGACCCTATAGAATTAATA  
AATTTATGTACTAATTCAGTAGGTAATCAGTTCCAAACACAACAAGCTAGAACAACCGTTCAACGGCAATTTAG  
CGAAGTGTGGAACCTGTCCCTCAAGTCACTGTTAGGTTTCTGACAGTGGTTTTAAGGTGTATAGGTACAAT  
GCGGTACTAGATCCTCTAGTTACTGCTTTGTTAGGAGCTTTCGATACTAGAAATAGGATTATAGAAGTCGAAA  
ATCAGGCGAACCCGACAACCGCCGAAACGTTAGACGCTACTCGTAGAGTAGATGACGCAACGGTGGCTATAA  
GGAGCGCTATGAATAATTTAGTAGTAGAATTGGTCAAAGGAACAGGTTTGTACAATCAGAGCACATTTGAAA  
GTGCATCCGGTTTACAATGGTCCTCTGCACCTGCATCTTGA

#OM892678

ATGGCATAACACACAGACAGCTACCACATCCGCTTTGCTCGACACTGTCCGAGGTAACAATACCTTGGTCAATG  
ATCTTGCGAAGCGGCGTCTTTATGACACAGCGGTGACGAGTTCAACGCTCGTGATCGCAGGCCCAAAGTAA  
ATTTTTCCAAAGTAATAAGTGAGGAACAGACGCTTATTGCTACTAGGGCATATCCAGAATTCAGATAACCTTC  
TATAATACGCAGAACGCCGTGCATTGCTTGGCGGTGGACTACGATCCTTAGAACTGGAATATCTAATGATGC  
AGATCCCGTACGGATCACTCACATATGATATAGGTGGGAATTTTGCATCTCATCTGTTCAAAGGACGGGCATA  
TGTTCACTGCTGTATGCCTAATCTTGATGTCCGCGACATAATGCGGCACGAAGGCCAGAAAGACAGTATAGAA  
TTATACCTTTCCAGGCTTGAGCGGGGCAACAAAGTTGTCCCAAATTTCCAAAAGGAAGCTTTTGACAGATACG  
CTGAAACGCCAGACGAAGTTGTCTGTACAGTACCTTCCAAACGTGTACGCACCAGCAGGTGGAAAACACAG  
GCAGGGTGTATGCTATTGCATTGCACAGTATATACGATATACCTGCTGATGAATTCGGAGCGGCACTTTTAAG  
GAAAAATGTCCATGTTTGTACGCCGCTTCCACTTTTCCGAGAATTTACTTCTCGAAGATTCACACGTCAACCT  
TGACGAAATCAACGCGTGTTCCTGCGTGTATGGAGACAAGCTGACTTTTTCTTTCGCATCTGAGAGCACTTTAA  
ATTATTGTCATAGTTATTCTAATATTTAAAATACGTGTGCAAACTTACTTCCCGGCATCTAATAGAGAGGTCT  
ACATGAAGGAGTTTTTAGTCACCAGGGTTAACACCTGGTTTTGTAAGTTTTCTAGGATAGATACTTTTTTATTAT  
ACAAGGGGGTAGCCACAAAGGTGTAAATAGTGAGCAATTTTACAGCGCAATGGAAGATGCATGGCACTACA  
AAAAGACTCTTGCAATGTGTAACAGCGAGAGGATTCTTCTGAAGATTCCTCATCGGTCAATTACTGGTCCCA  
AAAATGAGAGATATGGTCATAGTTCTCTATTGACATATCTCTCGACACCAGTAAAAGGACCCGCAAAGAAG  
TCTTAGTGCAAAGGATTTGTATTACAGTTTTAAATCACATTCGCACTTATCAAGCCAAGGCACTTACATACT  
CCAATGTTTTATCCTTTGTGAATCAATTGTTCAAGGGTAATTATCAACGGAGTGACTGCCAGGTCTGAGTGG  
GATGTTGACAAATCTTTTTGCAATCCTTGTCATGACATTTTTCTTGCATACTAAGCTTGCCGTTTTAAAAGAC  
GAATTGTTAATCAGCAAGTTTAGTTTGGGGCCAAAATCAGTAAGCCAGCATGTATGGGATGAGATTTCCCTGG  
CTTTTGAAACGCATTTCCATCGATCAAGGAGAGACTGCTAAATCGGAACTAATTAAGTGTCGGGAGACGC  
ATTAGAAATCAGGGTGCCTGATTTATATGTGACTTTTACGATAGATTAGTGACTGAGTACAAAACATCGGTG  
GATATGCCAGTGCTTGATATCAGAAAGAGAATGGAGGAGACTGAGGTTATGTACAATGCATTGTCTGAGCTA  
TCTGTGCTCAAGGAGTCGGACAAGTTGACGTTGATGTTTTTCCCGGATGTGCCAGACTTTGGAGGTAGACC  
CAATGACTGCAGCAAAGGTTATAGTGGCAGTGATGAGCAACGAGAGCGGACTGACTCTTACATTGCAACAGC  
CAACTGAAGCAAATGTCGATTGGCACTAAAAGATTGAGAAAAGCCTCTGAGGGTGCCTAGTGGTTACTTC  
TAGAGATGTTGAAGAACCATCCATGAAGGGTTCAATGGCAAGAGGAGATTACAATTGGCCGGTCTGTCTGG  
AGACCAACCAGAGTCTTCTATACTCGGAACGAGGAAATAGAGTCATTAGAGCAATTCCACATGGCAACGGCT  
AGTTCGTTAATTCGGAACAGATGAGTTCGATTGTGTACACGGGCCCATTAAGTTGAGCAAATGAAAACT  
TTATTGATAGCCTGGTAGCATCACTCTCTGCTGCGGTGTGCAACCTAGTCAAGATCCTAAAGGATACAGCTGCT  
ATAGATCTCGAAACCCGTCAGAAGTTTGGAGTCTTAGATGTTGCGACCAAAGATGGTTAATTAACCTTTAG  
CCAAAAATCACGCATGGGGCGTTATTGAAACACATGCTAGGAAGTACCAGTTGCACTTTTGAGTATGATGA  
GCATGGAGTGGTAACCTTGCACAGTTGGAGAAGGGTGGCCGTGAGTTCTGAGTCAATGGTTTATTCTGATAT  
GGCAAAGCTCAGAACTGAGGAGATTATTAAGAGATGGTGAGCCTCATGTCAGCAGTGCTAAAGTCGTCT  
AGTTGACGGTGTCCCGGGTTGTGGAAAGACAAAAGAGATTCTCTCGAAAGTAAATTTTGAGGAAGATCTAAT  
CTTAGTACCGGGTAAGCAGGCTGCTGAAATGATAAAGAGGCGTGCTAATGCGTCAGGAATAATTCAAGCCAC  
AAGAGATAATGTTCTGACTGTTGATTCAATTTATAATGAATTACGGTAAAGGAACACGCTGTGAGTTCAAAGG  
TTATTTATCGACGAAGGTCTGATGTTGCACACTGGTTGTGTGAATTTTCTGTTTCTATGTCTCTGTGCGAAAT  
GCATATGTATATGGAGACACACAACAAATTCATACATCAACAGAGTATCCGGTTTTCCGTACCCTGCACATTT  
TGCAAAAAATAGAGGTTGATGAGGTGGAAACACGCAGAACTACGCTGCGTTGTCCAGCCGACATTACCCACTA  
TCTTAACAGAAGGTACGAAGGACATGTCATGTGTACATCGTCGGTTAAAAGTCAGTTTCTCAGGAAATGGTG  
AGCGGGGCCGCAATGATCAATCCTGTATCTAAGCCATTGAATGGGAAAGTTTTGACTTTCACTCAGTCTGATA  
AAGAGGCGCTGCTTTCTGAGGATATACGGACGTCCATACAGTACATGAGGTACAAGGTGAGACATATGCAG  
ATGTGTCGTTGGTCAGATTGACTCCGACACCTGTATCTATCATCGCAGGAGATAGTCCGCACGTTCTCGTAGCT  
TTGTCAAGGCATACCCAAACATTGAAGTATTACACTGTAGTGATGGATCCTCTTGTAAGTATAATTAGGGATTT

AGAAAACTTAGTTCTTACTTGTTAGATATGTATAAAGTAGATGCAGGGACCCAATAGCAATTACAGGTAGAC  
TCCGTGTTTAAAGGTTCTAATCTTTTTGTTGCAGCACCAAAGACTGGAGATATCTCAGATATGCAATTTTACTAT  
GATAAGTGTCTCCCAGGTAATAGCACCATGTTAAATACTATGATGCTGTTACCATGAGGTTGACTGACATTC  
TCTTAATGTCAAAGATTGCATATTGGATTTCTCTAAGTCTGTGGCTGCACCGAAGGATCCGATCAAACCACTGA  
TTCCAATGGTACGAACGGCGGCAGAAATGCCACGCCAGACTGGACTATTGGAAAATTTGGTGGCGATGATCA  
AAAGAACTTTAATTCACCGGAGTTATCAGGAATAATCGACATTGAGAATACTGCATCTTTAGTAGTAGATAA  
ATTTTTGATAGTTACTTGCTTAAAGAAAAAGAAAACCAAATAAAAATGTTTCTTTATTTGTAGAGAGTCTCT  
CAATAGATGGTTAGAGAAGCAGGAGCAAGTGACCATTGGTCAGCTTGCAGATTTTGATTTGTGGATCTTCCT  
GCCGTTGATCAGTACAGGCATATGATTAAAGCGCAACCTAAGCAGAAGCTGGATACATCAATTCAAAGCGAAT  
ATCCGGCCTTGCAGACGATTGTGTATCATTGAAAAAGATCAACGCAATCTTCGGTCTTTGTTTCAGTGAGCTC  
ACAAGGCAAATGCTCGAAAGCATAGACTCAAGTAAGTTTTTGTCTTTACAAGGAAGACGCCAGCTCAAATTG  
AGGATTTCTTCGGAGATCTCGATAGCCATGTCCCTATGGATATCTTGAGTTGGATATTTCAAAGTATGACAAA  
TCTCAGAACGAGTTCCACTGTGCAGTAGAGTATGAAATATGGAGAAGACTTGGATTAGAAGATTTTCTGGGA  
GAAGTTTGAAACAAGGCCACAGAAAACTACTCTTAAAGATTACACAGCTGGTATTAAACGTGTTTATGGT  
ACCAGAGAAAAGAGTGGGGACGTTACAACATTCATCGGTAATACGGTGATTATTGCTGCTTGTTAGCTTCCAT  
GTTGCCCATGGAGAAAATAATCAAAGGTGCATTTTGGGAGATGACAGTTTACTATACTTCCAAAAGGTTGT  
GAGTTTCTTGACATACAGCATACAGCTAACCTTATGTGGAATTTGAGGCTAAGCTATTCAGAAAGCAGTATG  
GTTATTTCTGTGGAAGGTACGTGATACATCATGACAGAGGGTGTATTGTTTATTATGACCTTTGAAGTTGATT  
TCTAAACTTGGTGCTAAACACATCAAGGATTGGGATCACTTAGAAGAGTTCAGAAGATCCCTTTGTGATGTTG  
CAATTTGTTGAACAACTGTGCGTATTACACGCAGTTGGACGACGCTGTGAGTGAGGTCCATAAAACCGCACC  
CCCGGGTTCGTTTGTTTATAAAAGTTTAGTTAAATATCTGTCCGATAAGGTTCTTTTAGAAGTTTGTTTATAGA  
TGGCTCTTGTTAAGGGTAAAGTCAATATTAATGAGTTCATAGACTTGTCAAAATCAGAAAAATTTCTTCCGTCT  
ATGTTACACCTGTTAAGAGTGTGATGATCTCCAAGGTTGATAAGATATTGGTTCATGAAGATGAATCTTTGTC  
CGAAGTCAATTTACTCAAAGGTGTAAACTCATTGATGGTGGCTATGTACATCTTGCTGGTCTTGTAAGTACAG  
GTGAATGGAATTTGCCAGATAATTGTCGTGGTGGTGTGAGTGTCTGTTGGTCGATAAGAGAATGGAGAGAG  
CGGACGAGGCAACTCTTGCTTCACTATACCGCAGCGGCTAAGAAAAGGTTTCAGTTCAAAGTCGTACCAAA  
TTACAACATCACTACCAAGGACGCAGAAAAGGCAGTTTGGCAAGTACTAGTTAATATTAGGAATGTTAAATTT  
GCTGCGGGTACTGTCCGCTGTCATTAGAATTTGTGTCAGTGTGTATTGTTTATAAAAATATTATAAACTCGG  
TTTGAGAGAGAAAATTACGAGCGTCACGGATGGAGGGCCCATGGAAGTATCAGAAGAAGTTGTTGATGAGTT  
CATGGAAGAAGTCCCGATGTCTGTAAGGCTTGCAAAATTCGTTGGAAGACCGGGAAAAAGTTTAGTAGTAA  
AAGTGAGAATAATAGTGGTAATAATAGGCCGAAACCAGACAAAAACCAAAGGAAGGAAAAGGGTTTAAAG  
TTAGGGTTGAGAAGGATAATTTAATTGATAATGAATTGGAGACTTACGTCGCCGATTGAGATTCGTATTAAAT  
ATGTCTTACACAATCGCAACTCCATCGCAATTTGTGTTTTGTCATCAGCATGGGCCGACCCTATAGAATTAATA  
AATTTATGTACTAATTCAGTAAATCAGTTCCAAACACAACAAGCTAGAACAAACCGTTCAACGGCAATTTAG  
CGAAGTGTGGAAACCTGTCCCTCAAGTCACTGTTAGGTTTCTGACAGTGGTTTAAAGGTGTATAGGTACAAT  
GCGGTACTAGATCCTCTAGTTACTGCTTTGTTAGGAGCTTTCGATACTAGAAATAGGATTATAGAAGTCGAAA  
ATCAGGCGAACCCGACAACCGCCGAAACGTTAGACGCTACTCGTAGAGTAGATGACGCAACGGTGGCTATAA  
GGAGCGCTATGAATAATTTAGTAGTAGAATTGGTCAAAGGAACAGGTTTGTACAATCAGAGCACATTTGAAA  
GTGCATCCGGTTTACAATGGTCCTCTGCACCTGCATCTTGA

#OM892679

ATGGCATACACAGACAGCTACCACATCCGCTTTGCTCGACACTGTCCGAGGTAACAATACCTTGGTCAACG  
ATCTTGCGAAGCGGCGTCTTTATGACACAGCGGTGACGAGTTCAACGCTCGTGATCGCAGGCCCAAAGTAA

ATTTTCCAAAGTAATAAGTGAGGAACAGACGCTTATTGCTACTAGGGCATATCCAGAATTCCAGATAACCTTC  
TATAATACGCAGAACGCCGTGCATTGCTTGGCGGTGGACTACGATCCTTAGAACTGGAATATCTAATGATGC  
AGATCCCGTACGGATCACTCACATATGATATAGGTGGGAATTTGTCATCTCATCTGTTCAAAGGACGGGCATA  
TGTTCACTGCTGTATGCCAATCTTGATGTCCGCGACATAATGCGGCACGAAGGCCAGAAAGACAGTATAGAA  
TTATACCTTTCCAGGCTTGAGCGGGGCAACAAAGTTGTCCCAAATTTCCAAAAGGAAGCTTTTGACAGATACG  
CTGAAACGCCAGACGAAGTTGTCTGTACAGTACCTTCCAAACGTGTACGCACCAGCAGGTGGAAAACACAG  
GCAGGGTGTATGCTATTGCATTGCACAGTATATACGATATACCTGCTGATGAATTCGGAGCGGCACTTTTAAG  
GAAAAATGTCCATGTTTGTACGCCGCTTCCACTTTTCCGAGAATTTACTTCTCGAAGATTCACACGTCAACCT  
TGACGAAATCAACGCGTGTTTTTCGCGTGATGGAGACAAGCTGACTTTTTCTTTCGCATCTGAGAGCACTTTAA  
ATTATTGTCATAGTTATTCTAATATTTTAAAATACGTGTGCAAACTTACTTCCCGGCATCTAATAGAGAGGTCT  
ACATGAAGGAGTTTTTGGTCACCAGGGTTAACACCTGGTTTTGTAAGTTTTCTAGGATAGATACTTTTTATTAT  
ACAAGGGGGTAGCCCAAAAGGTGTAAATAGTGAGCAATTTTACAGCGCAATGGAAGATGCATGGCACTACA  
AAAAGACTCTTGAATGTGTAAACAGCGAGAGGATTCTTCTGAAGATTCCTCATCGGTCAATTACTGGTTCCTCA  
AAAATGAGAGATATGGTCATAGTTCTCTATTGACATATCTCTCGACACCAGTAAAAGGACCCGCAAAGAAG  
TCTTAGTGTCAAAGGATTTTGTATTACAGTTTTAAATCACATTCGCACTTATCAAGCCAAGGCACTTACATACT  
CCAATGTTTTATCCTTCGTCGAATCAATTCGTTCAAGGGTAATTATCAACGGAGTGACTGCCAGGTCTGAGTGG  
GATGTTGACAAATCTTTTTGCAATCCTTGTCATGACATTTTTCTTGCATACTAAGCTTGCCGTTTTAAAAGAC  
GAATTGTTAATCAGCAAGTTTAGTTTGGGGCCAAAATCAGTAAGCCAGCATGTATGGGATGAGATTTCCCTGG  
CTTTTGAAACGCATTTCCATCGATCAAGGAGAGACTGCTAAATCGGAACTAATTAAGTGTCGGGAGACGC  
ATTAGAAATCAGGGTGCCTGATTTATATGTGACTTTTACGATAGATTAGTGACTGAGTACAAAACATCGGTG  
GATATGCCAGTGCTTGATATCAGAAAGAGAATGGAGGAGACTGAGGTTATGTACAATGCATTGTCTGAGCTA  
TCTGTGCTCAAGGAGTCGGACAAGTTCGACGTTGATGTTTTTCCCGGATGTGCCAGACTTTGGAGGTAGACC  
CAATGACTGCAGCAAAGGTTATTGTGGCAGTGATGAGCAACGAGAGCGGACTGACTCTTACATTGCAACAGC  
CAACTGAAGCAAATGTGCGATTGGCACTTAAAGATTGAGAAAAAGCCTCTGAGGGTGCCTAGTGTTACTTC  
TAGAGATGTTGAAGAACCATCCATGAAGGGTCAATGGCAAGAGGAGATTACAATTGGCCGGTCTGTCTGG  
AGACCAACCAGAGTCTTCTATACTCGGAACGAGGAAATAGAGTCATTAGAGCAATTCACATGGCAACGGCT  
AGTTCGTTAATTCGGAAACAGATGAGTTCGATTGTGTACACGGGCCCCATTAAAGTTCAGCAAATGAAAACT  
TTATTGATAGCCTGGTAGCATCACTCTCTGCTGCGGTGTCGAACCTAGTCAAGATCCTAAAGGATACAGCTGCT  
ATAGATCTCGAAACCCGTCAGAAGTTTGGAGTCTTAGATGTTGCGACCAAAGATGGTTAATTAACCTTTAG  
CCAAGAATCACGCATGGGGCGTTATTGAAACACATGCTAGGAAGTACCACGTTGCACTTTGGAGTATGATGA  
GCATGGAGTGGTAAGTTCGACAGTTGGAGAAGGGTGGCCGTGAGTCTGAGTCAATGGTTTATTCTGATAT  
GGCAAAGCTCAGAACTGAGGAGATTATTAAGGGATGGTGAGCCTCATGTCAGCAGTGCTAAAGTCGTCTCT  
AGTTGACGGTGTCCCGGGTTGTGGAAAAGACAAAAGAGATTCTCTCGAAAGTAAATTTGAGGAAGATCTAAT  
CTTAGTACCGGTAAAGCAGGCTGCTGAAATGATAAAGAGGCGTGCTAATGCGTCAGGAATAATTCAAGCCAC  
AAGAGATAATGTTGCTACTGTTGATTCAATTTATAATGAATTACGGTAAAGGAACACGCTGTCAGTTCAAAGG  
TTATTTATCGACGAAGGTCTGATGTTGCACACTGGTTGTGTGAATTTCTTGTCTATGTCTCTGTGCGAAATT  
GCATATGTTTATGGAGACACACAACAAATTCCATACATCAACAGAGTATCCGGTTTTCCGTACCCTGCACATTT  
TGGAAAAATAGAGGTTGATGAGGTGGAACTCGCAGAACTACGCTGCGTTGTCCAGCCGACATTACCCACTA  
TCTTAACAGAAGGTACGAAGGATATGTCATGTGTACATCGTCGGTTAAAAAGTCAGTTTCTCAGGAAATGGTG  
AGCGGGGCCGCAATGATCAATCCTGTATCTAAGCCACTGAATGGGAAAGTTTTGACTTTCACTCAGTCTGATA  
AAGAGGCGCTGCTTCTCGAGGATATACGGACGTCCATACAGTACATGAGGTACAAGGTGAGACATATGCAG  
ATGTGTCGTTGGTCAGATTGACTCCGACACCTGTATCTATCATCGCAGGAGATAGTCCGCACGTTCTCGTAGCT  
TTGTCAAGGCATACCCAAACATTGAAGTATTACACCGTAGTGATGGATCCTCTTGAAGTATAATTAGGGATT  
AGAAAACTTAGTTCTTACTTGTAGATATGTATAAAGTAGATGCAGGGACCCAATAGCAATTACTGGTAGAC  
TCCGTGTTTAAAGGTTCTAATCTTTTTGTTGCAGCACCAAAGACTGGAGATATCTCAGATATGCAATTTTACTAT  
GATAAGTGTCTCCAGGTAATAGCACCATGTTAAATAACTATGATGCTGTTACCATGAGGTTGACTGACATTTT  
TCTTAATGTCAAAGATTGCATATTGGATTTCTCTAAGTCTGTGGCTGCACCGAAGGATCCGATCAAACCACTGA  
TTCCAATGGTACGAACGGCGGCAGAAATGCCACGCCAGACTGGACTATTGGAAAATTTGGTGGCGATGATCA

AAAGAACTTTAATTCACCGGAGTTATCAGGAATAATCGACATTGAGAATACTGCATCTTTAGTAGTAGATAA  
ATTTTTGATAGTTACTTGCTTAAAGAAAAAGAAAACCAAATAAAAATGTTTCTTTATTTGTAGAGAGTCTCT  
CAATAGATGGTTAGAGAAGCAGGAGCAAGTGACCATTGGTCAGCTTGCAGATTTTGATTTGTGGATCTTCCT  
GCCGTTGATCAGTACAGGCATATGATTAAAGCGCAACCTAAGCAGAAGCTGGATACATCAATTCAAAGCGAAT  
ATCCGGCCTTGCAGACGATTGTGTATCATTGAAAAAGATCAACGCAATCTTCGGTCCTTTGTTCACTGAGCTC  
ACAAGGCAAATGCTCGAAAGCATAGACTCAAGTAAGTTTTTGTCTTTACAAGGAAGACGCCAGCTCAAATTG  
AGGATTTCTTCGGAGATCTCGATAGCCATGTCCCTATGGATATCTGGAGTTGGATATTTGGAAGTATGACAAA  
TCTCAGAACGAGTTCCACTGTGCAGTAGAGTATGAAATATGGAGAAGACTTGGATTAGAAGATTTTCTGGGA  
GAAGTTTGGAACAAGGCCACAGGAAAACCTACTCTTAAAGATTACACAGCTGGTATTAACCGTGTTTATGGT  
ACCAGAGAAAAGAGTGGGGACGTTACAACATTCATCGGTAATACGGTGATTATTGCTGCTTGTAGCTTCCAT  
GTTGCCCATGGAGAAAATAATCAAAGGTGCATTTTGGGAGATGACAGTTTACTATACTTCCAAAAGGTTGT  
GAGTTTCTGACATACAGCATACAGCCAACCTTATGTGGAATTTGAGGCTAAGCTATTCAGAAAGCAGTATG  
GTTATTTCTGTGGAAGGTACGTGATACATCATGACAGAGGGTGTATTGTTTATTATGACCTTTGAAGTTGATT  
TCTAAACTTGGTGCTAAACACATCAAGGATTGGGATCACTTAGAAGAGTTCAGAAGATCCCTTTGTGATGTTG  
CAAATTCGTTGAACAACTGTGCGTATTACACGCAGTTGGACGACGCTGTGAGTGAGGTCCATAAACCGCACC  
CCCGGGTTCGTTTGTGTATAAAAGTTTAGTTAAATATCTGTCCGATAAGGTTCTTTTGAAGTTTGTATAGA  
TGGCTCTTGTTAAGGGTAAAGTCAATATTAATGAGTTCATAGACTTGTCAAATCAGAAAAATTTCTCCGTCT  
ATGTTACACCTGTTAAGAGTGTGATGATCTCAAGGTTGATAAGATATTGGTTCATGAAGATGAATCTTTGTC  
CGAAGTCAATTTACTCAAAGGTGTAAACTCATTGATGGTGGCTATGTACATCTTGCTGGTCTTGTTGGTGACA  
GGTGAATGGAATTTGCCAGATAATTGTCGTGGTGGTGTGAGTGTCTGTTTGGTCGATAAGAGAATGGAGAGA  
GCGGACGAGGCAACTCTTGCTTCACTATACCGCAGCGGTAAGAAAAGGTTTCAGTTCAAAGTCGTTCCAA  
ATTACAACATCACTACCAAGGACGCAGAAAAGACAGTTTGGCAAGTACTAGTTAATATTAGAAATGTTAAAT  
TGCTGCGGGTACTGTCCGCTGTCATTAGAATTTGTGTGAGTGTGATTGTTTATAAAAATATTATAAACTCG  
GTTTGAGAGAGAAAATTACGAGCGTCACGGATGGAGGGCCCATGGAAGTATCAGAAGAAGTTGTTGATGAG  
TTCATGGAAGAAGTCCCGATGTCTGTAAGGCTTGCAAAATTTGTTTGAAGACCGGAAAAAGTTTAGTAGTA  
AAAGTGAGAATAATAGTGGTAATAATAGGCCGAAACCAAACAAAAACCAAAGGAAGGAAAAGGGTTAAAA  
GTTAGGGTTGAGAAGGATAATTTAATTGATAATGAATTGGAGACTTACATCGCCGATTCAGATTCGTATTA  
TATGTCTTACACAATCGCAACTCCATCGCAATTTGTGTTTTGTGTCATCAGCATGGGCCGACCCTATAGAATTA  
AAATTTATGTACTAATTCAGTGGTAATCAGTTCCAAACACAACAAGCTAGAACAACCGTTCAACGGCAATTA  
GCGAAGTGTGGAACCTGTCCCTCAAGTCACTGTTAGGTTTCTGACAGTGGTTTAAAGGTGTATAGGTACAA  
TGCGGTACTAGATCCTCTAGTTACTGCTTTGTTAGGAGCTTCGATACTAGAAATAGGATTATAGAAGTCGAAA  
ATCAGGCGAACCCGACAACCGCCGAAACGTTAGACGCTACTCGTAGAGTAGATGACGCAACGGTGGCTATAA  
GGAGCGCTATAAATAATTTAGTAGTAGAATTGGTCAAAGGAACAGGTTTGTACAATCAGAGCACATTTGAAA  
GTGCATCCGGTTTACAATGGTCCTCTGCACCTGCATCTTGA

#OM892682

1

ATGGCATACACACAGACAGCTACCACATCCGCTTTGCTCGACACTGTCCGAGGTAACAATACCTTGGTCAACG  
ATCTTGCGAAGCGGCGTCTTTATGACACAGCGGTCGACGAGTTCAACGCTCGTGATCGCAGGCCCAAAGTAA  
ATTTTCCAAAGTAATAAGTGAGGAACAGACGCTTATTGCTACTAGGGCATATCCAGAATTCAGATAACCTTC  
TATAATACGCAGAACGCCGTGCATTCGCTTGCCGGTGGACTACGATCCTTAGAACTGGAATATCTAATGATGC  
AGATCCCGTACGGATCACTCACATATGATATAGGTGGGAATTTGCATCTCATCTGTTCAAAGGACGGGCATA  
TGTTCACTGCTGTATGCCAATCTTGATGTCCGCGACATAATGCGGCACGAAGGCCAGAAAGACAGTATAGAA  
TTATACCTTTCCAGGCTTGAGCGGGGCAACAAAGTTGTCCCAAATTTCCAAAAGGAAGCTTTTACAGATACG

CTGAAACGCCAGACGAAGTTGTCTGTACAGTACCTTCCAAACGTGTACGCACCAGCAGGTGGAAAACACAG  
GCAGGGTGTATGCTATTGCATTGCACAGTATATACGATATACCTGCTGATGAATTCGGAGCGGCACTTTTAAG  
GAAAAATGTCCATGTTTGTACGCCCTTCCACTTTTCCGAGAATTTACTTCTCGAAGATTCACACGTCAACCT  
TGACGAAATCAACGCGTGTTTTTCGCGTGATGGAGACAAGCTGACTTTTTCTTTCGCATCTGAGAGCACTTTAA  
ATTATTGTCATAGTTATTCTAATATTTTAAAATACGTGTGCAAACTTACTTCCCGGCATCTAATAGAGAGGTCT  
ACATGAAGGAGTTTTTGGTCACCAGGGTTAACACCTGGTTTTGTAAGTTTTCTAGGATAGATACTTTTTATTAT  
ACAAGGGGGTAGCCCAAAAGGTGTAAATAGTGAGCAATTTTACAGCGCAATGGAAGATGCATGGCACTACA  
AAAAGACTCTTGCAATGTGTAAACAGCGAGAGGATTCTTCTGAAGATTCCTCATCGGTCAATTACTGGTCCCA  
AAAATGAGAGATATGGTCATAGTTCCTCTATTGACATATCTCTCGACACCAGTAAAAGGACCCGCAAAGAAG  
TCTTAGTGTCAAAGGATTTTGTATTACAGTTCTAAATCACATTCGCACTTATCAAGCCAAGGCACTTACATACT  
CCAATGTTTTATCCTTTGTGAATCAATTCGTTCAAGGGTAATTATCAACGGAGTGACTGCCAGGTCTGAGTGG  
GATGTTGACAAATCTTTTTGCAATCCTTGTCATGACATTTTTCTGCATACTAAGCTTGCCGTTTTAAAAGAC  
GAATTGTTAATCAGCAAGTTTAGTTTGGGGCCAAAATCAGTAAGCCAGCATGTATGGGATGAGATTTCCCTGG  
CTTTTGAAACGCATTTCCATCGATCAAGGAGAGACTGCTAAATCGGAACTAATTAAGTGTCGGGAGACGC  
ATTAGAAATCAGGGTGCCTGATTTATATGTGACTTTTACGATAGATTAGTGACTGAGTACAAAACATCGGTG  
GATATGCCAGTGCTTGATATCAGAAAGAGAATGGAGGAGACTGAGGTTATGTACAATGCATTGTCTGAGCTA  
TCTGTGCTCAAGGAGTCGGACAAGTTCGACGTTGATGTTTTTCCCGGATGTGCCAGACTTTGGAGGTAGACC  
CAATGACTGCAGCAAAGTTATTGTGGCAGTGATGAGCAACGAGAGCGGACTGACTCTCACATTCGAACAGC  
CAACTGAAGCAAATGTGCGATTGGCACTTAAAGATTGAGAAAAAGCCTCTGAGGGTGCCTAGTGGTTACTTC  
TAGAGATGTTGAAGAACCATCCATGAAGGGTCAATGGCAAGAGGAGAGTTACAATTGGCCGGTCTGTCTGG  
AGACCAACCAGAGTCTTCTATACTCGGAACGAGGAAATAGAGTCATTAGAGCAATTCCACATGGCAACGGCT  
AGTTCGTTAATTCGGAAACAGATGAGTTCGATTGTGTACACGGGCCCCATTAAAGTTCAGCAAATGAAAACT  
TTATTGATAGCCTGGTAGCATCACTCTCTGCTGCGGTGTCGAACCTAGTCAAGATCCTAAAGGATACAGCTGCT  
ATAGATCTCGAAACCCGTCAGAAGTTTGGAGTCTTAGATGTTGCGACCAAAGATGGTTAATTAACCTTTAG  
CCAAGAATCACGCATGGGGCGTTATTGAAACACATGCTAGGAAGTACCACGTTGCACTTTTGGAGTATGATGA  
GCATGGAGTGGTAAGTTCGACAGTTGGAGAAGGGTGGCCGTGAGTCTGAGTCAATGGTTTATTCTGATAT  
GGCAAAGCTCAGAACACTGAGGAGATTATTAAGAGATGGTGAGCCTCATGTCAGCAGTGCTAAAGTCGTCT  
AGTTGACGGTGTCCCGGGTGTGGAAAAGACAAAAGAGATTCTCTCGAAAGTAAATTTGAGGAAGATCTAAT  
CTTAGTACCGGTAAAGCAGGCTGCTGAAATGATAAAGAGGCGTGCTAATGCGTCAGGAATAATTCAAGCCAC  
AAGAGATAATGTTCTGACTGTTGATTCAATTATAATGAATTACGGTAAAGGAACACGCTGTCAGTTCAAAAGG  
TTATTTATCGACGAAGGTCTGATGTTGCACACTGGTTGTGTGAATTTCTTGTCTATGTCTCTGTGCGAAATT  
GCATATGTTTATGGAGACACACAACAAATTCCATACATCAACAGAGTATCCGGTTTTCCGTACCCTGCACATTT  
TGCAAAAATAGAGGTTGATGAGGTGGAACTCGCAGAACTACGCTGCGTTGTCCAGCCGACATTACCCACTAT  
CTTAACAGAAGGTACGAAGGACATGTCATGTGTACATCGTCGGTTAAAAAGTCAGTTTCTCAGGAAATGGTGA  
GCGGGGCCGCAATGATCAATCCTGTATCTAAGCCATTGAATGGGAAAGTTTTGACTTTCACTCAGTCTGACAA  
AGAGGCGCTGCTTCTCGAGGATATACGGACGTCCATACAGTACATGAGGTACAAGGTGAGACATATGCAGA  
TGTGTCGTTGGTCAGATTGACTCCGACACCTGTATCTATTATCGCAGGAGATAGTCCGCACGTTCTCGTAGCTT  
TGTCAAGGCATACCCAAACATTGAAGTATTACACCGTAGTGATGGATCCTCTTGTAAGTATAATTAGGGATTTA  
GAAAACTTAGTTCTTACTTGTTAGATATGTATAAAGTAGATGCAGGGACCCAATAGCAATTACAGGTAGACT  
CCGTGTTTAAAGGTTCTAATCTTTTTGTTGCAGCACCAAGACTGGAGATATCTCAGATATGCAATTTTACTAT  
GATAAGTGTCTCCAGGTAATAGCACCATGTTAAATAACTATGATGCTGTTACCATGAGGTTGACTGACATTTT  
TCTTAATGTCAAAGATTGCATATTGGATTTCTCTAAGTCTGTGGCTGCACCGAAGGATCCGATCAAACCACTGA  
TTCCAATGGTACGAACGGCGGCAGAAATGCCACGCCAGACTGGACTATTGGAAAATTTGGTGGCGATGATCA  
AAAGAACTTTAATTCACCGGAGTTATCAGGAATAATCGACATTGAGAATACTGCATCTTTAGTAGTAGATAA  
ATTTTTGATAGTTACTTGCTTAAAGAAAAAGAAAACCAAATAAAAATGTTTCTTTATTTGTAGAGAGTCTCT  
CAATAGATGGTTAGAGAAGCAGGAGCAAGTGACCATTGGTCAGCTTGCAAGTTTTGATTTTGTGGATCTTCCT  
GCCGTTGATCAGTACAGGCATATGATTAAGCGCAACCTAAGCAGAAGCTGGATACATCAATTCAAAGCGAAT  
ATCCGGCCTTGACAGACGATTGTGTATCATTGAAAAAGATCAACGCAATCTTCGGTCCTTTGTTCAAGTGAGCTC

ACAAGGCAAATGCTCGAAAGCATAGACTCAAGTAAGTTTTTGTCTTTACAAGGAAGACGCCAGCTCAAATTG  
AGGATTTCTTCGGAGATCTCGATAGCCATGTCCCTATGGATATCTTGAGTTGGATATTTGGAAGTATGACAAA  
TCTCAGAACGAGTTCCACTGTGCAGTAGAGTATGAAATATGGAGAAGACTTGGATTAGAAGATTTTCTGGGA  
GAAGTTTGAAAACAAGGCCACAGGAAAACCTACTCTTAAAGATTACACAGCTGGTATTAACCGTGTATGCT  
ACCAGAGAAAAGAGTGGGGACGTTACAACATTCATCGGTAATACGGTGATTATTGCTGCTTGTAGCTTCCAT  
GTTGCCCATGGAGAAAATAATCAAAGGTGCATTTTTCGGGAGATGACAGTTTACTATACTTCCAAAAGGTTGT  
GAGTTTCTGACATACAGCATACAGCCAACCTTATGTGGAATTTGAGGGCTAAGCTATTCAGAAAGCAGTATG  
GTTATTTCTGTGGAAGGTACGTGATACATCATGACAGAGGGTGTATTGTTTATTATGACCTTTGAAGTTGATT  
TCTAAACTTGGTGCTAAACACATCAAGGATTGGGATCACTTAGAAGAGTTCAGAAGATCCCTTTGTGATGTTG  
CAAATTCGTTGAACAACTGTGCGTATTACACGCAGTTGGACGACGCTGTGAGTGAGGTCCATAAAACCGCACC  
CCCGGGTTCGTTTGTATATAAAAGTTTGTAAATATCTGTCCGATAAGGTTCTTTTAGAAGTTTGTATAGA  
TGGCTCTTGTAAAGGGTAAAGTCAATATTAATGAGTTCATAGACTTGTCAAATCAGAAAAATTTCTCCGTCT  
ATGTTACACCTGTTAAGAGTGTGATGATCTCAAGGTTGATAAGATATTGGTTCATGAAGATGAATCTTTGTC  
CGAAGTCAATTTACTCAAAGGTGTAAACTCATTGATGGTGGCTATGTACATCTTGTGCTGCTTGTGGTGACA  
GGTGAATGGAATTTGCCAGATAATTGTCGTGGTGGTGTGAGTGTCTGTTTGGTCGATAAGAGAATGGAGAGA  
GCGGACGAGGCAACTCTTGCTTCACTATACCGCAGCGGCTAAGAAAAGGTTTCAGTTCAAAGTCGTTCCAA  
ATTACAACATCACTACCAAGGACGCAGAAAAGGCAGTTTGGCAAGTACTAGTTAATATTAGAAATGTTAAAT  
TGCTGCGGGTACTGTCCGCTGTCATTAGAATTTGTGTGAGTGTGATTGTTTATAAAAAATATTATAAACTCG  
GTTTGAGAGAGAAAATTACGAGCGTCACGGATGGAGGGCCCATGGAAGTATCAGAAGAAGTTGTTGATGAG  
TTCATGGAAGAAGTCCCGATGTCTGTAAGGCTTGCAAAATTTGTCGGAAGACCGGAAAAAAGTTTAGTAGTA  
AAAGTGAGAATAATAGTGGTAATAATAGGCCGAAACCAACAAAAACCAAGGAAGGAAAAGGGTTAAAA  
ATTAGGGTTGAGAAGGATAATTTAATTGATAATGAATTGGAGACTTACGTCGCCGATTGAGATTCGTATTAA  
TATGTCTTACACAATCGCAACTCCATCGCAATTTGTGTTTTTGTATCAGCATGGGCCGACCCTATAGAATTA  
AAATTTATGTACTAATTCAGTGAATCAGTTCCAAACACAACAAGCTAGAACAACCGTTCAACGGCAATTTA  
GCGAAGTGTGGAACCTGTCCCTCAAGTCACTGTTAGGTTTCTGACAGTGGTTTAAAGGTGTATAGGTACAA  
TGCGGTACTAGATCCTCTAGTTACTGCTTTGTAGGAGCTTCGATACTAGAAATAGGATTATAGAAGTCGAAA  
ATCAGGCGAACCCGACAACCGCCGAAACGTTAGACGCTACTCGTAGAGTAGATGACGCAACGGTGGCTATAA  
GGAGCGCTATAAATAATTTAGTAGTAGAATTGGTCAAAGGAACAGGTTTGTACAATCAGAGCACATTTGAAA  
GTGCATCCGGTTTACAATGGTCCTCTGCACCTGCATCTTGA

#OM892683

1

ATGGCATACACACAGACAGCTACCACATCCGCTTTGCTCGACACTGTCCGAGGTAACAATACCTTGGTCAACG  
ATCTTGCGAAGCGGCGTCTTTATGACACAGCGGTGACGAGTTCAACGCTCGTGATCGCAGGCCCAAAGTAA  
ATTTTCCAAAGTAATAAGTGAGGAACAGACGCTTATTGCTACTAGGGCATATCCAGAATTCAGATAACCTTC  
TATAATACGCAGAACGCCGTGCATTGCTTCCGCGTGGACTACGATCCTTAGAACTGGAATATCTAATGATGC  
AGATCCCGTACGGATCACTCACATATGATATAGGTGGGAATTTGCATCTCATCTGTTCAAAGGACGGGCATA  
TGTTCACTGCTGTATGCCAATCTTGATGTCCGCGACATAATGCGGCACGAAGGCCAGAAAGACAGTATAGAA  
TTATACCTTTCCAGGCTTGAGCGGGGCAACAAAGTTGTCCCAAATTTCCAAAAGGAAGCTTTTACAGATACG  
CTGAAACGCCAGACGAAGTTGTCTGTACAGTACCTTCCAAACGTGTACGCACCAGCAGGTGGAAAACACAG  
GCAGGGTGTATGCTATTGCATTGCACAGTATATACGATATACCTGCTGATGAATTCGGAGCGGCACTTTTAA  
AAAAATGTCCATGTTTGTACGCCGCTTCCACTTTTCCGAGAATTTACTTCTCGAAGATTCACACGTCAACCT  
TGACGAAATCAACGCGTGTGTTTTCGCGTGATGGAGACAAGCTGACTTTTCTTTCGCATCTGAGAGCACTTTAA  
ATTATTGTCATAGTTATTCTAATATTTTAAAAATACGTGTGCAAACTTACTTCCCGGCATCTAATAGAGAGGTCT

ACATGAAGGAGTTTTTGGTCACCAGGGTTAACACCTGGTTTTGTAAGTTTTCTAGGATAGATACTTTTTTATTAT  
ACAAGGGGGTAGCCCAAAAGGTGTAAATAGTGAGCAATTTTACAGCGCAATGGAAGATGCATGGCACTACA  
AAAAGACTCTTGCAATGTGTAAACAGCGAGAGGATTCTTCTGAAGATTCTCATCGGTCAATTACTGGTCCCA  
AAAATGAGAGATATGGTCATAGTTCTCTATTTCGACATATCTCTCGACACCAGTAAAAGGACCCGCAAAGAAG  
TCTTAGTGTCAAAGGATTTTGTATTACAGTTCTAAATCACATTGCACTTATCAAGCCAAGGCACTTACATACT  
CCAATGTTTTATCCTTTGTGCAATCAATTCGTTCAAGGGTAATTATCAACGGAGTGACTGCCAGGTCTGAGTGG  
GATGTTGACAAATCTCTTTGCAATCCTTGTCATGACATTTTTCTGCATACTAAGCTTGCCGTTTTAAAAGAC  
GAATTGTTAATCAGCAAGTTTAGTTTGGGGCCAAAATCAGTAAGCCAGCATGTATGGGATGAGATTTCCCTGG  
CTTTTGAAACGCATTTCCATCGATCAAGGAGAGACTGCTAAATCGGAACTAATTAAGTGTCGGGAGACGC  
ATTAGAAATCAGGGTGCCTGATTTATATGTGACTTTTCACGATAGATTAGTGACTGAGTACAAAACATCGGTG  
GATATGCCAGTGCTTGATATCAGAAAGAGAATGGAGGAGACTGAGGTTATGTACAATGCATTGTCTGAGCTA  
TCTGTGCTCAAGGAGTCGGACAAGTTCGACGTTGATGTTTTTTCCCGGATGTGCCAGACTTTGGAGGTAGACC  
CAATGACTGCAGCAAAGGTTATTGTGGCAGTGATGAGCAACGAGAGCGGACTGACTCTCACATTCGAACAGC  
CAACTGAAGCAAATGTGCGATTGGCACTTAAAGATTGAGAAAAAGCCTCTGAGGGTGCCTAGTGGTTACTTC  
TAGAGATGTTGAAGAACCATCCATGAAGGGTCAATGGCAAGAGGAGAGTTACAATTGGCCGGTCTGTCTGG  
AGACCAACCAGAGTCTTCTATACTCGGAACGAGGAAATAGAGTCATTAGAGCAATTCCACATGGCAACGGCT  
AGTTGTTAATTCGGAAACAGATGAGTTCGATTGTGTACACGGGCCCCATTAAAGTTCAGCAAATGAAAACT  
TTATTGATAGCCTGGTAGCATCACTCTCTGCTGCGGTGTCGAACCTAGTCAAGATCCTAAAGGATACAGCTGCT  
ATAGATCTCGAAACCCGTCAGAAGTTTGGAGTCTTAGATGTTGCGACCAAAGATGGTTAATTAACCTTTAG  
CCAAGAATCACGCATGGGGCGTTATTGAAACACATGCTAGGAAGTACCACGTTGCACTTTTGGAGTATGATGA  
GCATGGAGTGGTAACTTGCGACAGTTGGAGAAGGGTGGCCGTGAGTTCTGAGTCAATGGTTTATTCTGATAT  
GGCAAAGCTCAGAACACTGAGGAGATTATTAAGAGATGGTGAGCCTCATGTCAGCAGTGCTAAAGTCGTCT  
AGTTGACGGTGTCCCGGTTGTGGAAAGACAAAAGAGATTCTCTCGAAAGTAAATTTTGGAGGAAGATCTAAT  
CTTAGTACCGGTAAGCAGGCTGCTGAAATGATAAAGAGGCGTGCTAATGCGTCAGGAATAATTCAAGCCAC  
AAGAGATAATGTTCTGACTGTTGATTCAATTATAATGAATTACGGTAAAGGAACACGCTGTCAGTTCAAAGG  
TTATTTATCGACGAAGGTCTGATGTTGCACACTGGTTGTGTGAATTTCTTGTCTATGTCTCTGTGCGAAATT  
GCATATGTTTATGGAGACACACAACAAATTCCATACATCAACAGAGTATCCGGTTTTCCGTACCCTGCACATTT  
TGCAAAAATAGAGTTGATGAGGTAGAACTCGCAGAACTACGCTGCGTTGTCCAGCCGACATTACCCACTAT  
CTTAACAGAAGGTACGAAGGACATGTCATGTGTACATCGTCGGTTAAAAAGTCAGTTTCTCAGGAAATGGTGA  
GCGGGGCCGCAATGATCAATCCTGTATCTAAGCCATTGAATGGGAAAGTTTTGACTTTCACTCAGTCTGACAA  
AGAGGCGCTGCTTCTCGAGGATATACGGACGTCCATACAGTACATGAGGTACAAGGTGAGACATATGCAGA  
TGTGTCGTTGGTCAGATTGACTCCGACACCTGTATCTATTATCGCAGGAGATAGTCCGCACGTTCTCGTAGCTT  
TGTCAAGGCATACCCAAACATTGAAGTATTACACCGTAGTGATGGATCCTCTTGTAAGTATAATTAGGGATTGA  
GAAAACTTAGTTCTTACTTGTTAGATATGTATAAAGTAGATGCAGGGACCCAATAGCAATTACAGGTAGACT  
CCGTGTTTAAAGGTTCTAATCTTTTTGTTGCAGCACCAAAGACTGGAGATATCTCAGATATGCAATTTTACTAT  
GATAAGTGTCTCCAGGTAATAGCACCATGTTAAATAACTATGATGCTGTTACCATGAGGTTGACTGACATTTT  
TCTTAATGTCAAAGATTGCATATTGGATTTCTCTAAGTCTGTGGCTGCACCGAAGGATCCGATCAAACCACTGA  
TTCCAATGGTACGAACGGCGGCAGAAATGCCACGCCAGACTGGACTATTGGAAAATTTGGTGGCGATGATCA  
AAAGAACTTTAATTCACCGGAGTTATCAGGAATAATCGACATTGAGAATACTGCATCTTTAGTAGTAGATAA  
ATTTTTGATAGTTACTTGCTTAAAGAAAAAGAAAAACCAAATAAAAATGTTTCTTTATTTTGTAGAGAGTCTCT  
CAATAGATGGTTAGAGAAGCAGGAGCAAGTGACCATTGGTCAGCTTGCGAGTTTTGATTTTGTGGATCTTCCT  
GCCGTTGATCAGTACAGGCATATGATTAAGCGCAACCTAAGCAGAAGCTGGATACATCAATTCAAAGCGAAT  
ATCCGGCCTTGACAGACGATTGTGTATCATTCGAAAAAGATCAACGCAATCTTCGGTCTTTGTTTCACTGAGCTC  
ACAAGGCAAATGCTCGAAAGCATAGACTCAAGTAAGTTTTTGTCTTTACAAGGAAGACGCCAGCTCAAATTG  
AGGATTTCTTCGGAGATCTCGATAGCCATGTCCCTATGGATATCTTGAGTTGGATATTTTGAAGTATGACAAA  
TCTCAGAACGAGTTCCACTGTGCAGTAGAGTATGAAATATGGAGAAGACTTGGATTAGAAGATTTTCTGGGA  
GAAGTTTGAAACAAGGCCACAGGAAAACACTCTTAAAGATTACACAGCTGGTATTAAACGTGTTTATGGT  
ACCAGAGAAAGAGTGGGGACGTTACAACATTCATCGGTAATACGGTGATTATTGCTGCTTGTTTAGCTTCCAT



GTTGCCCATGGAGAAAATAATCAAAGGTGCATTTTGC GGAGATGACAGTTTACTATACTTCCCAAAGGTTGT  
GAGTTTCTGACATACAGCATACAGCCAACCTTATGTGGAATTTGAGGCTAAGCTATTCAGAAAGCAGTATG  
GTTATTTCTGTGGAAGGTACGTGATACATCATGACAGAGGGTGTATTGTTTATTATGACCCTTTGAAGTTGATT  
TCTAAACTTGGTGCTAAACACATCAAGGATTGGGATCACTTAGAAGAGTTCAGAAGATCCCTTTGTGATGTTG  
CAAATTCGTTGAACAACTGTGCGTATTACACGCAGTTGGACGACGCTGTGAGTGAGGTCCATAAAACCGCACC  
CCCGGGTTCGTTTGTATATAAAAGTTTAGTTAAATATCTGTCCGATAAGGTTCTTTTGTAGAGTTTGTATAGA  
TGGCTCTTGTTAAGGGTAAAGTCAATATTAATGAGTTCATAGACTTGTCAAATCAGAAAAATTTCTTCCGTCT  
ATGTTACACCTGTTAAGAGTGTGATGATCTCAAGGTTGATAAGATATTGGTTCATGAAGATGAATCTTTGTC  
CGAAGTCAATTTACTCAAAGGTGTAAACTCATTGATGGTGGCTATGTACATCTTGCTGGTCTTGTGGTGACA  
GGTGAATGGAATTTGCCAGATAATTGTCGTGGTGGTGTGAGTGTCTGTTTGGTCGATAAGAGAATGGAGAGA  
GCGGACGAGGCAACTCTTGCTTCATACTATACCGCAGCGGCTAAGAAAAGGTTTCAGTTCAAAGTCGTTCCAA  
ATTACAACATCACTACCAAGGACGCAGAAAAGGCAGTTTGGCAAGTACTAGTTAATATTAGAAATGTTAAAT  
TGCTGCGGGTACTGTCCGCTGTCATTAGAATTTGTGTGAGTGTGTATTGTTTATAAAAATATTATAAACTCG  
GTTTGAGAGAGAAAATTACGAGCGTCACGGATGGAGGGCCCATGGAAGTATCAGAAGAAGTTGTTGATGAG  
TTCATGGAAGAAGTCCCGATGTCTGTAAGGCTTGCAAAATTTCTGTGCAAGACCGGAAAAAAGTTTAGTAGTA  
AAAGTGAGAATAATAGTGGTAATAATAGGCCGAAACCAACAAAAACCAAGGAAGGAAAAGGGTTTAAAA  
ATTAGGGTTGAGAAGGATAATTTAATTGATAATGAATTGGAGACTTACGTCGCCGATTGAGATTGATGATTAA  
TATGTCTTACACAATCGCAACTCCATCGCAATTTGTGTTTTGTGTCATCAGCATGGGCCGACCCTATAGAATTA  
AAATTTATGTACTAATTCAGTGAATCAGTTCCAAACACAACAAGCTAGAACAAACCGTTCAACGGCAATTTA  
GCGAAGTGTGGAACCTGTCCCTCAAGTCACTGTTAGGTTTCTGACAGTGGTTTAAAGGTGTATAGGTACAA  
TGCGGTACTAGATCCTCTAGTTACTGCTTTGTTAGGAGCTTCGATACTAGAAATAGGATTATAGAAGTCGAAA  
ATCAGGCGAACCCGACAACCGCCGAAACGTTAGACGCTACTCGTAGAGTAGATGACGCAACGGTGGCTATAA  
GGAGCGCTATAAATAATTTAGTAGTAGAATTGGTCAAAGGAACAGGTTTGTACAATCAGAGCACATTTGAAA  
GTGCATCCGGTTTACAATGGTCCTCTGCACCTGCATCTTGA

#OM892686

1

ATGGCATACACACAGACAGCTACCACATCCGCTTTGCTCGACACTGTCCGAGGTAACAATACCTTGGTCAACG  
ATCTTGCGAAGCGGCGTCTTTATGACACAGCGGTGACGAGTTCAACGCTCGTGATCGCAGGCCCAAAGTAA  
ATTTTCCAAAGTAATAAGTGAGGAACAGACGCTTATTGCTACTAGGGCATATCCAGAATTCAGATAACCTTC  
TATAATACGCAGAACGCCGTGCATTGCTTGGCGGTGGACTACGATCCTTAGAACTGGAATATCTAATGATGC  
AGATCCCGTACGGATCACTCACATATGATATAGGTGGGAATTTGCATCTCATCTGTTCAAAGGACGGGCATA  
TGTTCACTGCTGTATGCCAATCTTGATGTCCGCGACATAATGCGGCACGAAGGCCAGAAAGACAGTATAGAA  
TTATACCTTTCCAGGCTTGAGCGGGGCAACAAAGTTGTCCCAAATTTCCAAAAGGAAGCTTTTGACAGATACG  
CTGAAACGCCAGACGAAGTTGTCTGTACAGTACCTTCCAAACGTGTACGCACCAGCAGGTGGAAAACACAG  
GCAGGGTGTATGCTATTGCATTGCACAGTATATACGATATACCTGCTGATGAATTCGGAGCGGCACTTTTAA  
GAAAAATGTCCATGTTTGTACGCCGCTTCCACTTTTCCGAGAATTTACTTCTCGAAGATTCACACGTCAACCT  
TGACGAAATCAACGCGTGTTCGCGTGATGGAGACAAGCTGACTTTTCTTTCGCATCTGAGAGCACTTTAA  
ATTATTGTCATAGTTATTCTAATATTTTAAAAACGTGTGCAAACTTACTTCCCGGCATCTAATAGAGAGGTCT  
ACATGAAGGAGTTTTTGGTCACCAGGGTTAACACCTGGTTTTGTAAGTTTTCTAGGATAGATACTTTTTATTAT  
ACAAGGGGGTAGCCCAAAAGGTGTAAATAGTGAGCAATTTTACAGCGCAATGGAAGATGCATGGCACTACA  
AAAAGACTCTTGCAATGTGTAAACAGCGAGAGGATTCTTCTGAAGATTCCTCATCGGTCAATTACTGGTCCCA  
AAAATGAGAGATATGGTCATAGTTCTCTATTGACATATCTCTCGACACCAGTAAAAGGACCCGCAAGAAG  
TCTTAGTGTCAAAGGATTTTGTATTACAGTTTTAAATCACATTCGCACTTATCAAGCCAAGGCACTTACATACT

CCAATGTTTTATCCTTTGTCGAATCAATTCGTTCAAGGGTAATTATCAACGGAGTGACTGCCAGGTCTGAGTGG  
GATGTTGACAAATCTCTTTTGAATCCTTGTCATGACATTTTTCTGCATACTAAGCTTGCCGTTTTAAAAGAC  
GAATTGTTAATCAGCAAGTTTAGTTTGGGGCCAAAATCAGTAAGCCAGCATGTATGGGATGAGATTTCCCTGG  
CTTTTGAAACGCATTTCCATCGATCAAGGAGAGACTGCTAAATCGGAACTAATTAAGTGTCTGGGAGACGC  
ATTAGAAATCAGGGTGCCTGATTTATATGTGACTTTTCACGATAGATTAGTGACTGAGTACAAAACATCGGTG  
GATATGCCAGTGCTTGATATCAGAAAGAGAATGGAGGAGACTGAGGTTATGTACAATGCATTGTCTGAGCTA  
TCTGTGCTCAAGGAGTCGGACAAGTTCGACGTTGATGTTTTTTCCCGGATGTGCCAGACTTTGGAGGTAGACC  
CAATGACTGCAGCAAAGGTTATTGTGGCAGTGATGAGCAACGAGAGCGGACTGACTCTTACATTCGAACAGC  
CAACTGAAGCAAACGTGCGATTGGCACTTAAGATTAGAAAAAGCCTCTGAGGGTGCAGTGTGTTACTTC  
TAGAGATGTTGAAGAACCATCCATGAAGGGTTCATGGCAAGAGGAGAGTTACAATTGGCCGGTCTGTCTGG  
AGACCAACCAGAGTCTTCTATACTCGGAACGAGGAAATAGAGTCATTAGAGCAATTCACATGGCAACGGCT  
AGTTCGTTAATTCGGAAACAGATGAGTTCGATTGTGTACACGGGCCCATTAAGTTCAGCAAATGAAAACT  
TTATTGATAGCCTGGTAGCATCACTCTCTGCTGCGGTGTCGAACCTAGTCAAGATCCTAAAGGATACAGCTGCT  
ATAGATCTCGAAACCCGTCAGAAGTTTGGAGTCTTAGATGTTGCGACCAAAGATGGTTAATTAACCTTTAG  
CCAAGAATCACGCATGGGGCGTTATTGAAACACATGCTAGGAAGTACCACGTTGCACTTTTGGAGTATGATGA  
GCATGGAGTGGTAACTTGCGACAGTTGGAGAAGGGTGGCCGTGAGTCTGAGTCAATGGTTTATTCTGATAT  
GGCAAAGCTCAGAACACTGAGGAGATTACTAAGGGATGGTGAGCCTCATGTCAGCAGTGCTAAAGTCGTCCT  
AGTTGACGGTGTCCCGGGTTGTGGAAAGACAAAAGAGATTCTCTCGAAAGTAAATTTGAGGAAGATCTAAT  
CTTAGTACCGGGTAAGCAGGCTGCTGAAATGATAAAGAGGCGTGCTAATGCGTCAGGAATAATTCAAGCCAC  
AAGAGATAATGTTCTGACTGTTGATTCAATTATAATGAATTACGGTAAAGGAACACGCTGTCAGTTCAAAAGG  
TTATTTATCGACGAAGGTCTGATGTTGCACACTGGTTGTGTGAATTTCTTGTCTATGTCTCTGTGCGAAATT  
GCATATGTTTATGGAGACACACAACAAATTCCATACATCAACAGAGTATCCGGTTTTCCGTACCCTGCACATTT  
TGCAAAAATAGAGGTTGATGAGGTGGAACTCGCAGAACTACGCTGCGTTGTCCAGCCGACATTACCCACTAT  
CTTAACAGAAGGTACGAAGGACATGTCATGTGTACATCGTCGGTTAAAAAGTCAGTTTCTCAGGAAATGGTGA  
GCGGGGCCGCAATGATCAATCCTGTATCTAAGCCACTGAATGGGAAAGTTTTGACTTTCACTCAGTCTGATAA  
AGAGGCGCTGCTTCTCGAGGATATACGGACGTCCATACAGTACATGAGGTACAAGGTGAGACATATGCAGA  
TGTGTCGTTGGTCAGATTGACTCCGACACCTGTATCTATCATCGCAGGAGATAGTCCGCACGTTCTCGTAGCTT  
TGTCAAGGCATACCCAAACATTGAAGTATTACACCGTAGTGATGGATCCTCTTGTAAGTATAATTAGGGATTGA  
GAAAACTTAGTTCTTACTTGTTAGATATGTATAAAGTAGATGCAGGGACCCAATAGCAATTACAGGTAGACT  
CCGTGTTTAAAGGTTCTAATCTTTTTGTTGCAGCACCAAGACTGGAGATATCTCAGATATGCAATTTTACTAT  
GATAAGTGTCTCCAGGTAATAGCACCATGTTAAATAACTATGATGCTGTTACCATGAGGTTGACTGACATTTT  
TCTTAATGTCAAAGATTGCATATTGGATTTCTCTAAGTCTGTGGCTGCACCGAAGGATCCGATCAAACCACTGA  
TTCCAATGGTACGAACGGCGGCAGAAATGCCACGCCAGACTGGACTATTGGAAAATTTGGTGGCGATGATCA  
AAAGAACTTTAATTCACCGGAGTTATCAGGAACAATCGACATTGAGAATACTGCATCTTTAGTAGTAGATAA  
ATTTTTGATAGTTACTTGCTTAAAGAAAAAAGAAAACCAAATAAAAAATGTTTCTTTATTTGTAGAGAGTCTCT  
CAATAGATGGTTAGAGAAGCAGGAGCAAGTGACCATTGGTCAGCTTGCGAGTTTTGATTTTGTAGATCTTCCT  
GCCGTTGATCAGTACAGACATATGATTAAAGCGCAACCTAAGCAGAAGCTGGATACATCAATTCAAAGCGAAT  
ATCCGGCCTTGCGAGACGATTGTGTATCATTCGAAAAAGATCAACGCAATCTTCGGTCCTTTGTTCAAGTGAGCTC  
ACAAGGCAAATGCTTGAAAGCATAGACTCAAGTAAGTTTTTGTCTTTACAAGGAAGACGCCAGCTCAAATTG  
AGGATTTCTTCGGAGATCTCGATAGCCATGTCCCTATGGATATCTGGAGTTGGATATTTGGAAGTATGACAAA  
TCTCAGAACGAGTTCCACTGTGCAGTAGAGTATGAAATATGGAGAAGACTTGGATTAGAAGATTTTCTGGGA  
GAAGTTTGAAACAAGGCCACAGGAAAACCTACTCTTAAAGATTACACAGCTGGTATTAAACGTGTTTATGGT  
ACCAGAGAAAAGAGTGGGGACGTTACAACATTATCGGTAATACGGTGATTATTGCTGCTTGTTTAGCTCCAT  
GTTGCCCATGGAGAAAATAATCAAAGGTGCATTTTTCGGAGATGACAGTTTACTATACTTCCAAAAGGTTGT  
GAGTTTCTGACATACAGCATAACGCCAACCCTTATGTGGAATTTTCGAGGCTAAGCTATTCAGAAAGCAGTATG  
GTTATTTCTGTGGAAGGTACGTGATACATCATGACAGAGGGTGTATTGTTTATTATGACCCTTTGAAGTTGATT  
TCTAAACTTGGTGCTAAACACATCAAGGATTGGGATCACTTAGAAGAGTTCAGAAGATCCCTTTGTGATGTTG  
CAAATTCGTTGAACAACTGTGCGTATTACACGCAGTTGGACGACGCTGTGAGTGAGGTCCATAAAACCGCAC

CCCGGGTTCGTTTGTGTATAAAAGTTTAGTTAAATATCTGTCCGATAAGGTTCTTTTTAGAAGTTTGTATAGATGGCTCTTGTTAAGGGTAAAGTCAATATTAATGAGTTCATAGACTTGTCAAATCAGAAAAATTTCTCCGTCTATGTTACACCTGTTAAGAGTGTCTGATCTCCAAGGTTGATAAGATATTGGTTCATGAAGATGAATCTTTGTCGAAGTCAATTTACTCAAAGGTGTAAACTCATTGATGGTGGCTATGTACATCTTGCTGGTCTTGTTGGTGACAGGTGAATGGAATTTGCCAGATAATTGTCGTGGTGGTGTGAGTGTCTGTTTGGTCGATAAGAGAATGGAGAGAGCGGACGAGGCAACTCTTGCTTCATACTATACCGCAGCGGCTAAGAAAAGGTTTCAGTTCAAAGTCGTTCCAAATTACAACATCACTACCAAGGACGCAGAAAAGGCAGTTTGGCAAGTACTAGTTAATATTAGAAATGTTAAATTGCTGCGGGTACTGTCCGCTGTCATTAGAATTTGTGTGAGTGTGATTGTTTATAAAAAATATTATAAACTCGTTTGAGAGAGAAAATTACGAGCGTCACGGATGGAGGGCCCATGGAAGTATCAGAAGAAGTTGTTGATGAGTTCATTGAAGAAGTCCCGATGTCTGTAAGGCTTGCAAAATTTGTTTGAAGACCGGAAAAAAGTTTAGTAGTAAAGTGAGAATAATAGTGGTAATAATAGGCCGAAACCAACAAAAACCAAGGAAGGAAAAGGGTTAAAAATTAGGGTTGAGAAGGATAATTTAATTGATAATGAATTGGAGACTTACATCGCCGATTGAGATTGCTATTAAATATGTCTTACACAATCGCAACTCCATCGCAATTTGTGTTTTTGTCTCAGCATGGGCCGACCCTATAGAATTAATAAATTTATGTACTAATTCAGTTCAGGTAATCAGTTCCAAACACAACAAGCTAGAACAAACCGTTCAACGGCAATTTAGCGAAGTGTGGAAACCTGTCCCTCAAGTCACTGTTAGGTTTCTGACAGTGGTTTAAAGGTGTATAGGTACAAATGCGGTACTAGATCCTCTAGTTACTGCTTTGTTAGGAGCTTCGATACTAGAAATAGGATTATAGAAGTCGAAATCAGGCGAACCCGACAACCGCCGAAACGTTAGACGCTACTCGTAGAGTAGATGACGCAACGGTGGCTATAAGGAGCGCTATAAATAATTTAGTAGTAGAATTGGTCAAAGGAACAGGTTGTACAATCAGAGCACATTTGAAAGTGCATCCGGTTTACAATGGTCCTCTGCACCTGCATCTTGA

#OP557566

1

ATGGCATACACACAGACAGCTACCACATCCGCTTTGCTCGACACTGTCCGAGGTAACAATACCTTGGTCAACGATCTTGCGAAGCGGcGTcTTTATGACACAGCGGTGACGAGTTCAACGCTCGTGATCGCAGGCCCAAAGTAAATTTTTCCAAAGTAATAAGTGAGGAACAGACGCTTATTGCTACTAGGGCATATCCAGAATTCAGATAaCCTTCTATAATACGCAGAACGCCGTGCATTGcTTGCCGGTGGACTACGATCCTTAGAACTGGAATATCTAATGAtGCAATGATCCCGTACGGATCACTCACAtATGATATAGGTGGGAATTTTGCATCTCATcTGTTCAAAGGACGGGCATATGTTCCTGCTGTATGCCAATcTTGATGTCCGCGACATAATGCGGCaCGAAGGCCAGAAAAGACAGTATAGAATTAATACCTTTCCAGGcTtGAGCGGGGCAACAAAGTTGTCCCAAATTTCCAAAAGGAAGCTTTTGACaGATACGCTGAAGcCCAGACGAAGTTGTcTGTCaCAGTaCCTTCCAAACGtGTACgCaCCAGCAGGtGGAAAAACaCAGGCaGGGtGTaTgCtATTGCATTGCACAGTATATACGATATACCTGCTGATGAATTTCGGAGcGGCACTTTTAAGGAAAAATGTCCATGTTTGTACgCCgCCTTCCaCTTTCCGAGAATTTACTTCTCGAAgATTCaCaCGTCAACCTTGACGAAATCAACGcGtGTTTTTCGCGTGATGGAGACAAGCtGACTTTTTCTTCGCATCTGaGAGCaCTTTAAATTATTGTCAATAGTTATTcTAATATTTTAAAAATACGTGTGCAAACTTACTTCCCGGCATCTAATAGAGAGGTCTACAtGAAGGAGTTTTTGGTCACCAGGGTTAACACcTGGTTTTGTAAGTTTTCTAGGATAgATACTTTTTTaTTATACAAGGGGGTAGCCCACAAAGGTGTAAAtAGtGAGCAATTTTACAGCGCAATGGAAGATGCATGGCACTACAAAAAGACTCTTGCAATGTGTAACAGCGAGAGGATTCTTCTGAAGATTCCTCATCGGTCAATTACTGGTTCCCAAAAATGAGAGATATGGTCATAGTTCTCTATTGACATATCTCTCGACACCAGTAAAAGGACCCGCAAGAAGTCTTAGTGCTAAAGGATTTTGTATTACAGTTTTAAATCACATTCGCACTTATCAAGCCAAGGCACTTACATACTCCAATGTTTTATCCTTTGTGAATCAATTCGTTCAAGGGTAATTATCAACGGAGTGACTGCCAGGTCTGAGTGGGATGTTGACAAATCTCTTTTGAATCCTGTCCATGACATTTTTCTTGCACTAAAGCTTGCCGTTTTTAAAGACGAATTGTTATCAGCAAGTTTAGTTGGGGCCAAATCAGTAAGCCAGCATGTATGGGATGAGATTTCCCTGGCTTTTGAAACGCATTTCCATCGATCAAGGAGAGACTGCTAAATCGGAACTAATTAAAGTGTGCGGAGACGCATTAGAAATCAGAGTGCCTGATTTATATGTGACTTTTACGATAGATTAGTGGCTGAGTACAAAACATCGGTGGATATGCC

AGTGCTTGATATCAGAAAGAGAATGGAGGAGACTGAGGTTATGTACAATGCATTGTCTGAGCTATCTGTGCTC  
AAGGAATCGGACAAGTTTCGACGTTGATGTTTTTTCCCGGATGTGCCAGACTTTGGAGGTAGACCCAATGACTG  
CAGCAAAGGTTATTGTGGCAGTGATGAGCAACGAGAGCGGACTGACTCTTACATTGCAACAGCCAACTGAAG  
CAAATGTCGCATTGGCACTTAAAGATTAGAAAAAGCCTCTGAGGGTGCAGTGTGTTACTTCTAGAGATGT  
TGAAGAACCATCCATGAAGGGTTCAATGGCAAGAGGAGAGTTACAATTGGCCGGTCTGTCTGGAGACCAACC  
AGAGTCTTCTATACTCGGAACGAGGAAATAGAGTCATTAGAGCAATTCCACATGGCAACGGCTAGTTCGTTA  
ATTCGGAAACAGATGAGTTCGATTGTGTACACGGGCCCCACTAAAGTTCAGCAAATGAAAACTTTATTGATA  
GCCTGGTAGCATCACTCTCTGCTGCGGTGTGCAACCTAGTCAAGATCCTAAAGGATACAGCTGCTATAGATCT  
CGAAACCCGTCAGAAGTTTGGAGTCTTAGATGTTGCGACCAAAAGATGGTTAATTAACCTTTAgCCAaAATC  
aCGCaTGGGGcGTTaTTGAAACACATGCTAGGAAGTACCACGTTGCAcTTTTGGAGTATGATGAGCATGGAGt  
GGtAACTTGCgACAGTtGgAgAAGGGtGGCCGtGAGTtCTGAGTCAATGGTTTATTCTGATATGGCAAaGCTCAg  
AACACTGAGGAGATTATTAAGAGATGGTGagCCTCATGTGACGAGTGCTAAAGTCGTCCTAGTTGACGGTGTG  
CCGGGTTGTGGAAGACAAAAGAGATTCTCTCGAAgTAAATTTTGAGGAAGATCTAATCTTAGTACcGGGT  
AGCAGGCTGCTGAAATGATAAAGAGGCGTGCTAATGCGTCAGGAATAATTCAAGCCACAAGAGATAATGTT  
GTACTGTTGATTCATTTATAATGAATTACGGTAAAGGAACACGCTGTGAGTTCAAAAGGTTATTTATCGACGA  
GGTCTGATGTTGCACACTGGTTGTGTGAATTTTCTGTTTCTATGTCTCTGTGCGAAATTGCATATGTTTATGGA  
GACACACAACAAATTCATACATCAACAGAGTATCCGGTTTTCCGTACCCTGCACATTTTGCAAAAATAGAGGT  
TGATGAGGTGGAACTCGCAGAACTACGCTGCGTTGTCCAGCCGACATTACCACTATCTTAACAGAAGGTAC  
GAAGGATATGTCATGTGTACATCGTCGGTTAAAAAGTCAGTTTCTCAGGAAATGGTGAGCGGGGCCGCAATG  
ATCAATCCTGTATCTAGGCCATTGAATGGGAAAGTTTTGACTTTCACTCAGTCTGATAAAGAGGCGCTGCTTTC  
TCGAGGATATACGGACGTCCATACAGTACATGAGGTACAAGGTGAGACATATGCAGATGTGTGCTTGGTCAG  
ATTGACTCCGACACCTATATCTATCATCGCAGGAGATAGTCCGCACGTTCTCGTAGCTTTGTCAAGGCATACCC  
AAACATTGAAGTATTACACCGTAGTGATGGATCCTCTTGTAAGTATAATTAGGGATTAGAAAACTTAGTTCT  
TACTTGTTAGATATGTATAAAGTAGATGCAGGGACCCAATAGCAATTACAGGTAGACTCCGTGTTTAAAGGTT  
CTAATCTTTTTGTTGCAGCACCAAAGACTGGAGATATCTCAGATATGCAATTTTACTATGATAAGTGTCTCCCA  
GGTAATAGCACCATGTTAAATAACTATGATGCTGTTACCATGAGGTTGACTGACATTTCTCTTAATGTCAAAGA  
TTGCATATTGGATTTCTCTAAGTCTGTGGCTGCACCGAAGGATCCGATCAAACCACTGATTCCAATGGTACGAA  
CGGCGGCAGAAATGCCACGCCAGACTGGACTATTGGAATAATTTGGTGGCGATGATCAAAGAAACTTTAATT  
CACCGGAGTTATCAGGAATAATCGACATTGAGAATACTGCATCTTTAGTAGTAGATAAATTTTTTGATAGTTAC  
TTGCTTAAAGAAAAAAGAAACCAAATAAAAAATGTTCTTTATTTGTAGAGAGTCTCTCAATAGATGGTTAGA  
GAAGCAGGAGCAAGTGACCATTGGTCAGCTTGAGATTTTGATTTTGTGGATCTTCCTGCCGTTGATCAGTAC  
AGGCATATGATTAAAGCGCAACCTAAGCAGAAGCTGGATACATCAATTCAAAGCGAATATCCGGCCTTGACG  
ACGATTGTGTATCATTCGAAAAAGATCAACGCAATCTTCGGTCTTTGTTCAGTGAGCTCACAAGGCAAATGCT  
CGAAAGCATAGACTCAAGTAAGTTTTTGTCTTTACAAGGAAGACGCCAGCTCAAATTGAGGATTTCTTCGGA  
GATCTCGATAGCCATGTCCCTATGGATATCTTGAGTTGGATATTTTCAAGTATGACAAATCTCAGAACGAGTT  
CCACTGTGCAGTAGAGTATGAAATATGGAGAAGACTTGGAATTAGAAGATTTTCTGGGAGAAGTTTGGAAACA  
AGGCCACAGGAAAACCTACTCTTAAAGATTACACAGCTGGTATTAACGTTGTTTATGGTACCAGAGAAAGAGT  
GGGGACGTTACAACATTCATCGGTAATACGGTGATTATTGCTGCTTGTAGCTTCCATGTTGCCCATGGAGAA  
AATAATCAAAGGTGCATTTTTCGGGAGATGACAGTTTACTATACTTCCCAAAAGGTTGTGAGTTTCTGACATAC  
AGCATACAGCCAACCTTATGTGGAATTTTCGAGGCTAAGCTATTAGAAAGCAGTATGGTTATTTCTGTGGAAG  
GTACGTGATACATCATGACAGAGGGTGATTGTTTATTATGACCTTTGAAGTTGATTTCTAACTTGGTGCTA  
AACACATCAAGGATTGGGATCACTTAGAAGAGTTCAGAAGATCCCTTTGTGATGTTGCAAATTCGTTGAACAA  
CTGTGCGTATTACACGCAAGTTGGACGACGCTGTGAGTGAGGTCCATAAAACCGCACCCCCGGGTTGTTTGT  
TATAAAAGTTTAGTTAAATATCTGTCCGATAAGGTTCTTTTTAGAAAGTTGTTTATAGATGGCTCTTGTTAAGG  
GTAAATCAATATTAATGAGTTCATAGACTTGTCAAATCAAAAAATTTCTTCCGTCTATGTTACACCTGTTA  
AGAGTGTGATGATCTCCAAGGTTGATAAGATATTGGTTCATGAAGATGAATCTTTGTCCGAAGTCAATTTACTC  
AAAGGTGTAAACTCATTGATGGTGGCTATGTACATCTTGCTGGTCTTGTGGTGACAGGTGAATGGAATTTGC  
CAGATAATTGTCGTGGTGGTGTGAGTGTCTGTTGGTCGATAAGAGAATGGAGAGAGCGGACGAGGCAACTC

TTGCTTCATACTATACCGCAGCGGCTAAGAAAAGGTTTCAGTTCAAAGTCGTTCCAAATTACAACATCACTACC  
AAGGACGCAGAAAAGACAGTTTGGCAAGTACTAGTTAATATTAGAAATGTTAAAATTGCTGCGGGTTACTGTC  
CGCTGTCATTAGAATTTGTGTCAGTGTGTATTGTTTATAAAAAATATTATAAACTCGGTTTGAGAGAGAAAATT  
ACGAGCGTCACGGATGGAGGGCCCATGGAATATCAGAAGAAGTTGTTGATGAGTTCATGGAAGAAGTCCC  
GATGTCTGTAAGGCTTGCAAAATTTCTGTCGAAGACCGGAAAAAAGTTTAGTAGTAAAAGTGAGAATAATAG  
TGGTAATAATAGGCCGAAACCAGACAAAAACCAAAGGAAGAAAAAGGGTTTAAAAGTTAGGGTTGAGAAGG  
ATAATTTAATTGATAATGAATTGGAGACTTACGTCGCCGATTCAAGATTTCGTATTAAATATGTCTTACACAATCG  
CAACTCCATCGCAATTTGTGTTTTTGTATCAGCATGGGCAGACCCTATAGAATTAATAAATTTATGTACTAATT  
CACTAGGTAATCAGTTCCAAACACAACAAGCTAGAACAACCGTTCAACGGCAATTTAGCGAAGTGTGGAAACC  
TGTCCCTCAAGTCACTGTTAGGTTTCCTGACAGTGGTTTTAAGGTGTATAGGTACAATGCGGTACTAGATCCTC  
TAGTTACTGCTTTGTTAGGAGCTTTCGATACTAGAAATAGGATTATAGAAGTCGAAAATCAGGCGAACCCGAC  
AACCGCCGAAACGTTAGACGCTACTCGTAGAGTAGATGACGCAACGGTGGCTATAAGGAGCGCTATAAATAA  
TTTAGTAGTAGAATTGGTCAAAGGAACAGGTTTGTACAATCAGAGCACATTTGAAAGTGCATCCGGTTTACAA  
TGGTCCTCTGCACCTGCATCTTGA
